# Supplementary material for: Homeostatic Tissue Responses in Skin Biopsies from NOMID Patients with Constitutive Overproduction of IL-1β
Source: PubMed Central journal article supplement (PMC3511496; doi:10.1371/journal.pone.0049408), 2012-11-30
Supplement: pone.0049408.s014.pdf [file pone.0049408.s014.pdf]

## Clinical details

|  | Age   | Sex | Type             | Clinical Phenotype pre-treatment                                                                                                                                     | Bx site                     | Mutation | Other NOMID features                                                              | Anakinra dose at time of post treatment biopsy | Prednisone equivalent steroid dose (mg/kg) pre/post |
|--|-------|-----|------------------|----------------------------------------------------------------------------------------------------------------------------------------------------------------------|-----------------------------|----------|-----------------------------------------------------------------------------------|------------------------------------------------|-----------------------------------------------------|
|  | 11yo* | M   | lesional/post    | Generalized, scattered urticarial slightly pink eruption from head to toe.                                                                                           | R buttock/R hip             | negative | bony overgrowth, hearing and vision loss, aseptic meningitis, developmental delay | Anakinra 2mg/kg/dy                             | 0.46/0.31                                           |
|  | 9yo*  | F   | lesional/post    | Urticarial plaques scattered on head, trunk, extremities, buttocks, 10-15% TBSA.                                                                                     | buttock/ R upper buttock    | D303N    | aseptic meningitis                                                                | Anakinra 1.5mg/kg/dy                           | 0.29/0.20                                           |
|  | 8yo*  | F   | lesional/post    | face, chest, arms, back, legs, buttocks with numerous small (8mm to 1.5 cm) annular urticarial lesions                                                               | L buttock/ R buttock        | G569R    | bony overgrowth, aseptic meningitis                                               | Anakinra 1.5mg/kg/dy                           | 0.55/0.30                                           |
|  | 4yo*  | M   | lesional/post    | Diffuse pink-brown urticarial rash that is generalized from head to toe.                                                                                             | R upper back/ L buttock     | G326E    | hearing loss, aseptic meningitis                                                  | Anakinra 1.5mg/kg/dy                           | 0/0                                                 |
|  | 7yo   | M   | lesional/post    | Pink, scattered, somewhat (2mm-1cm) reticulated (or lacy) wheals on the upper chest, back, thigh, palms and soles.                                                   | R buttock/R upper buttock   | negative | bony overgrowth, aseptic meningitis                                               | Anakinra 1.5mg/kg/dy                           | 0.44/0.38                                           |
|  | 7yo*  | F   | lesional         | Scattered urticarial papules varying in size from 1 mm to more elongated lesions with a long-diameter of 1.5 cm. Erythema cheeks.                                    | Unknown                     | L264F    | bony overgrowth, hearing loss, aseptic meningitis, mild developmental delay       | N/A                                            | 1.04                                                |
|  | 8yo*  | F   | nonlesional      | Generalized reticulation on the upper trunk, knees and back. No evidence of NOMID like rash, nails have clubbed appearance.                                          | R buttock                   | A374N    | hearing loss, aseptic meningitis, severe developmental delay                      | N/A                                            | 0.83                                                |
|  | 16yo  | M   | lesional         | few discrete pink, urticarial papules varying from 6-10mm over the lower abdomen and over the gluteal area.                                                          | Abdomen left lower quadrant | F443L    | hearing loss, aseptic meningitis, mild developmental delay                        | N/A                                            | 0.16                                                |
|  | 4yo*  | F   | nonlesional/post | Scattered erythematous macules in groups. LE thighs, flanks <1% BSA                                                                                                  | R upper buttock             | negative | bony overgrowth, visual impairment, developmental delay                           | Anakinra 2mg/kg/dy                             | 0/0                                                 |
|  | 16yo* | M   | nonlesional/post | Generalized non-pruritic urticaria rash.                                                                                                                             | L arm/unknown               | T348M    | hearing loss, aseptic meningitis                                                  | Anakinra 1.5mg/kg/dy                           | 0/0                                                 |
|  | 28yo  | F   | nonlesional/post | Chest, face, arms, back, abd, legs with few pink urticarial papulae.                                                                                                 | L upper inner arm/unknown   | D303N    | hearing loss, visual impairment, aseptic meningitis, mild developmental delay     | Anakinra 1.5mg/kg/dy                           | 0/0                                                 |
|  | 18yo  | F   | post             | Erythema noted on eyelids.No rash noted today. No urticaria.                                                                                                         | Unknown                     | negative | bony overgrowth, hearing loss, aseptic meningitis, developmental delay            | Anakinra 2mg/kg/dy                             | 0.08                                                |
|  | 8yo*  | M   | lesional/post    | Irregularly shaped pink urticarial papules varying from a few mm's to 1 cm in diameter scattered on his extremities. Palms with mottled bright erythematous macules. | R buttock/R iliac crest     | L632F    | hearing loss, aseptic meningitis                                                  | Anakinra 2mg/kg/dy                             | 0.97/0.67                                           |
|  | 11yo* | F   | nonlesional/post | keratosis pilaris, lichenification antecubital fossae, Xerosis                                                                                                       | R buttock/R buttock         | V262A    | hearing loss, aseptic meningitis, mild developmental delay                        | Anakinra 1.5mg/kg/dy                           | 0/0                                                 |

\*biopsies included in the microarray analyses
