# Supplementary material for: Homeostatic Tissue Responses in Skin Biopsies from NOMID Patients with Constitutive Overproduction of IL-1β
Source: PubMed Central journal article supplement (PMC3511496; doi:10.1371/journal.pone.0049408), 2012-11-30
Supplement: pone.0049408.s015.pdf [file pone.0049408.s015.pdf]

**Table S6. Antibodies used for Immunohistochemistry and Immunofluorescence.**

| Antibody                     | Cell specificity                                                  | Source                   | Clone <sup>a</sup>   | Iso                      | Dilution |
|------------------------------|-------------------------------------------------------------------|--------------------------|----------------------|--------------------------|----------|
| CD11c                        | myeloid DC (dermal)                                               | BD Pharmingen            | B-ly6                | IgG1                     | 1:100    |
| BDCA-1 (CD1c)                | myeloid DC (dermal/resident)                                      | Miltenyi                 | AD5-8E7              | IgG2a                    | 1:100    |
| HLA-DR                       | activated lymphocytes, monocytes, macrophages and dendritic cells | BD Pharmingen            | L243                 | IgG2a                    | 1:200    |
| CD163                        | macrophages                                                       | Acris                    | 5C6-FAT              | IgG1                     | 1:500    |
| CD3                          | T lymphocytes                                                     | BD Pharmingen            | SK7                  | IgG1                     | 1:100    |
| NALP3                        | myeloid DC, keratinocytes, macrophages, monocytes                 | Acris                    | Nalpy3-b             | IgG1                     | 1:50     |
| iNOS                         | variety of cell types                                             | Santa Cruz Biotechnology | N-20                 | Affinity purified rabbit | 1:20     |
| IL-23p19                     | myeloid DC, monocytes, macrophages                                | BioLegend                | HLT2736              | IgG1                     | 1:50     |
| Neutrophil elastase          | Neutrophils                                                       | Dako                     | NP57                 | IgG1                     | 1:200    |
| Cleaved caspase-1 p20 (h297) | Activated caspase-1                                               | Santa Cruz Biotechnology | Poly-clonal goat IgG | N/A                      | 1:20     |
| IL-1Ra                       | Interleukin 1 receptor antagonist                                 | R&D Systems              | Poly-clonal goat IgG | N/A                      | 1:200    |
| IL-36Ra (IL-1F5)             | Interleukin 36 receptor antagonist (IL-1F5)                       | R&D Systems              | 190524               | IgG2b                    | 1:10     |

<sup>a</sup>All are murine monoclonals unless stated
