# Supplementary material for: Homeostatic Tissue Responses in Skin Biopsies from NOMID Patients with Constitutive Overproduction of IL-1β
Source: PLoS One. 2012 Nov 30;7(11):e49408. doi: 10.1371/journal.pone.0049408 (PMC3511496; doi:10.1371/journal.pone.0049408)
Supplement: Table S1 — DEGs for each comparison. (XLS) [file pone.0049408.s010.xls]

## Sheet: Table S3 NOMID DEGs copy.csv
NOMID differentially expressed genes (DEGs)
	LSvsNL-lgFCH	LSvsNL-FCH	LSvsNL-p	LSvsNL-FDR	LSvsNL-Status	LSvsNormal-lgFCH	LSvsNormal-FCH	LSvsNormal-p	LSvsNormal-FDR	LSvsNormal-Status	NLvsNormal-lgFCH	NLvsNormal-FCH	NLvsNormal-p	NLvsNormal-FDR	NLvsNormal-Status	PostvsLS-lgFCH	PostvsLS-FCH	PostvsLS-p	PostvsLS-FDR	PostvsLS-Status	PostvsNL-lgFCH	PostvsNL-FCH	PostvsNL-p	PostvsNL-FDR	PostvsNL-Status	PostvsNormal-lgFCH	PostvsNormal-FCH	PostvsNormal-p	PostvsNormal-FDR	PostvsNormal-Status	LS	NL	Normal	Post	Symbol	GeneName	ENTREZ	OMIM	ChromLoc
7920317	-1.15	0.44921	0.000916801	0.00290895	-1	-2.29	0.203965	6.16e-07	2.78e-06	-1	-1.14	0.454051	0.00116309	0.00519563	-1	0.91	1.87857	0.00292051	0.00456319	0	-0.24	0.843873	0.371389	0.613983	0	-1.38	0.383162	2.93e-05	0.000685624	-1	5.64028	6.79482	7.93389	6.54992	ILF2	interleukin enhancer binding factor 2, 45kDa	3608	603181	1
7955729	-1	0.498795	0.00528234	0.0114885	-1	-2.24	0.211774	1.55e-06	5.69e-06	-1	-1.24	0.424572	0.000883172	0.00426728	-1	0.7	1.62501	0.021907	0.0291285	0	-0.3	0.810546	0.29987	0.546272	0	-1.54	0.344135	1.22e-05	0.000369666	-1	4.71308	5.71656	6.95248	5.41353	MFSD5	major facilitator superfamily domain containing 5	84975	NA	12
8157270	-1.53	0.347027	0.00532249	0.0115597	-1	-3.5	0.0882633	1.01e-06	4.05e-06	-1	-1.98	0.254341	0.000548902	0.00307379	-1	0.96	1.93909	0.0368445	0.0472319	0	-0.57	0.672916	0.201224	0.441593	0	-2.55	0.17115	3.71e-06	0.00015341	-1	4.191	5.71788	7.69304	5.14638	SLC31A1	solute carrier family 31 (copper transporters), member 1	1317	603085	9
7899005	-2.1	0.232873	3.26e-07	1.56e-05	-1	-3.32	0.100318	2e-10	1.37e-08	-1	-1.21	0.430785	0.000320294	0.00209398	-1	2.48	5.57237	1.97e-09	7.84e-08	1	0.38	1.29766	0.158093	0.391983	0	-0.84	0.559011	0.00218458	0.0125947	0	4.56314	6.66553	7.88049	7.04143	TMEM50A	transmembrane protein 50A	23585	605348	1
7899361	-1.2	0.433803	0.000154494	0.000775735	-1	-2.37	0.193335	2.68e-08	2.84e-07	-1	-1.17	0.445676	0.000211233	0.00157502	-1	1.5	2.82979	1.83e-06	9.14e-06	1	0.3	1.22757	0.218769	0.46327	0	-0.87	0.547098	0.000852344	0.00673384	0	5.58147	6.78636	7.9523	7.08217	STX12	syntaxin 12	23673	606892	1
7900413	-1.13	0.456056	0.0175741	0.0307806	-1	-2.54	0.172321	1.84e-05	4.4e-05	-1	-1.4	0.377851	0.00395477	0.0125158	-1	1.3	2.45419	0.002802	0.00439625	1	0.16	1.11925	0.679326	0.834489	0	-1.24	0.422908	0.00296505	0.0155299	-1	4.23867	5.37139	6.7755	5.53392	ZMPSTE24	zinc metallopeptidase (STE24 homolog, S. cerevisiae)	10269	275210, 606480, 608612	1
7901052	-1.76	0.295257	0.00848621	0.0168936	-1	-3.25	0.105124	3.66e-05	7.92e-05	-1	-1.49	0.356044	0.0202822	0.0424478	-1	2.92	7.57117	1.27e-05	4.16e-05	1	1.16	2.23544	0.0402015	0.197079	0	-0.33	0.795914	0.519826	0.618237	0	3.66744	5.4274	6.91727	6.58796	SNORD38B	small nucleolar RNA, C/D box 38B	94163	NA	1
7901418	-1.69	0.309558	4.22e-05	0.000309125	-1	-3.36	0.097361	2.35e-09	5.86e-08	-1	-1.67	0.314516	4.16e-05	0.000546685	-1	2.18	4.54146	1.47e-07	1.46e-06	1	0.49	1.40585	0.106486	0.319149	0	-1.18	0.442162	0.00034457	0.00367822	-1	4.41344	6.10515	7.77395	6.59659	BTF3L4	basic transcription factor 3-like 4	91408	NA	1
7901513	-1.3	0.405936	0.000868462	0.00279129	-1	-2.41	0.187948	7.96e-07	3.38e-06	-1	-1.11	0.462999	0.00299534	0.0101275	-1	1.52	2.86943	3.74e-05	0.000100786	1	0.22	1.16481	0.467268	0.693083	0	-0.89	0.539304	0.00475817	0.0213337	0	3.48709	4.78776	5.89868	5.00785	SCP2	sterol carrier protein 2	6342	184755	1, 1, 1
7902367	-2.24	0.21229	9.87e-05	0.000560291	-1	-4.07	0.0596521	2.35e-08	2.61e-07	-1	-1.83	0.280994	0.000601652	0.00328139	-1	2.55	5.83984	1.75e-06	8.84e-06	1	0.31	1.23974	0.457065	0.68497	0	-1.52	0.348358	0.000651099	0.00562622	-1	3.85944	6.09533	7.92672	6.40536	ACADM	acyl-Coenzyme A dehydrogenase, C-4 to C-12 straight chain	34	201450, 607008	1
7902382	-1.65	0.317586	0.00164144	0.00456204	-1	-3.44	0.0920234	3.5e-07	1.79e-06	-1	-1.79	0.289759	0.000680827	0.00354812	-1	2.62	6.16878	1.23e-06	6.8e-06	1	0.97	1.95911	0.0252486	0.155565	0	-0.82	0.567672	0.0446186	0.10091	0	3.69779	5.35257	7.13964	6.32277	RABGGTB	Rab geranylgeranyltransferase, beta subunit	5876	179080	1
7903119	-2.17	0.221497	2.78e-07	1.39e-05	-1	-3.91	0.0665421	2.44e-11	4.01e-09	-1	-1.73	0.300419	7.01e-06	0.000179156	-1	2.86	7.27621	1.55e-10	1.57e-08	1	0.69	1.61166	0.0153213	0.121705	0	-1.05	0.484175	0.000422459	0.00419809	-1	3.26049	5.43513	7.17008	6.12368	ABCD3	ATP-binding cassette, sub-family D (ALD), member 3	5825	170995	1, 1
7903321	-1.69	0.308926	0.000127821	0.000673134	-1	-2.91	0.133395	1.65e-07	1.02e-06	-1	-1.21	0.431803	0.00291167	0.00990892	-1	2.35	5.11363	2.29e-07	1.99e-06	1	0.66	1.57973	0.052624	0.225598	0	-0.55	0.682134	0.0877412	0.165276	0	4.90801	6.60268	7.81423	7.26236	RTCD1	RNA terminal phosphate cyclase domain 1	8634	611286	1
7903404	-1.47	0.360246	0.000226709	0.00102785	-1	-2.59	0.165606	3.06e-07	1.63e-06	-1	-1.12	0.459703	0.00284016	0.00974139	-1	2.52	5.74499	2.12e-08	3.89e-07	1	1.05	2.06961	0.00182037	0.0435416	1	-0.07	0.951406	0.804367	0.853785	0	7.02974	8.50269	9.62391	9.55205	RNPC3	RNA-binding region (RNP1, RRM) containing 3	55599	NA	1
7903414	-1.35	0.391422	9.4e-05	0.000541262	-1	-2.86	0.137718	2.1e-09	5.48e-08	-1	-1.51	0.35184	1.94e-05	0.000336603	-1	2.71	6.53584	1.66e-10	1.59e-08	1	1.36	2.55827	1.75e-05	0.00504363	1	-0.15	0.900103	0.52598	0.623859	0	4.09907	5.45227	6.95928	6.80744	AMY2A	amylase, alpha 2A (pancreatic)	279	104650	1
7904853	-1.38	0.383824	0.000376994	0.00148751	-1	-2.55	0.170981	1.26e-07	8.34e-07	-1	-1.17	0.445467	0.00136413	0.005843	-1	2.19	4.56823	5.76e-08	7.69e-07	1	0.81	1.7534	0.00953305	0.0970748	0	-0.36	0.781081	0.193549	0.296398	0	4.11973	5.50121	6.66782	6.31137	GPR89C	G protein-coupled receptor 89C	728932	NA	1, 1
7904881	-1.17	0.443515	0.0139701	0.0254257	-1	-2.73	0.150618	4.27e-06	1.28e-05	-1	-1.56	0.339601	0.00142337	0.00600496	-1	1.71	3.27711	0.000146009	0.000322951	1	0.54	1.45344	0.17296	0.409226	0	-1.02	0.493592	0.00972797	0.0345876	-1	5.12945	6.30239	7.86048	6.84187	PDIA3P	protein disulfide isomerase family A, member 3 pseudogene	171423	NA	1
7904930	-1.39	0.382346	0.000162425	0.000804952	-1	-2.65	0.159517	2.46e-08	2.67e-07	-1	-1.26	0.417206	0.000340066	0.00218022	-1	2.09	4.26071	4.14e-08	6.15e-07	1	0.7	1.62907	0.0145298	0.118792	0	-0.56	0.679655	0.0363918	0.0869886	0	3.62916	5.01622	6.27738	5.72026	GPR89B	G protein-coupled receptor 89B	51463	NA	1
7907439	-2.34	0.196848	6.48e-06	8.8e-05	-1	-3.44	0.0923094	2.4e-08	2.63e-07	-1	-1.09	0.468937	0.00998696	0.0246261	-1	2.3	4.91548	8.01e-07	4.95e-06	1	-0.05	0.967604	0.892625	0.952674	0	-1.14	0.453745	0.00200734	0.0118955	-1	4.65619	7.00104	8.09357	6.95352	PRDX6	peroxiredoxin 6	9588	602316	1
7908421	-1.24	0.42439	0.000181587	0.000868939	-1	-2.53	0.173193	1.93e-08	2.31e-07	-1	-1.29	0.408098	0.000108257	0.00101488	-1	1.87	3.66352	9.32e-08	1.06e-06	1	0.64	1.55476	0.0154072	0.121705	0	-0.66	0.634495	0.0107069	0.0367233	0	4.08102	5.31756	6.61057	5.95425	TROVE2	TROVE domain family, member 2	6738	600063	1, 1, 1
7908614	-1.16	0.446653	0.00103491	0.00319565	-1	-2.42	0.186941	2.43e-07	1.36e-06	-1	-1.26	0.418538	0.000477757	0.00279121	-1	1.81	3.50347	9.76e-07	5.74e-06	1	0.65	1.56484	0.0262816	0.158458	0	-0.61	0.654943	0.029728	0.0759066	0	4.78263	5.9454	7.20197	6.59141	CAMSAP1L1	calmodulin regulated spectrin-associated protein 1-like 1	23271	NA	1
7909142	-1.64	0.321946	0.000203797	0.000947959	-1	-3.72	0.0756592	3.2e-09	7.05e-08	-1	-2.09	0.235006	9.68e-06	0.000220835	-1	2.73	6.61865	2.18e-08	3.94e-07	1	1.09	2.13085	0.00275129	0.0536361	0	-1	0.500762	0.00425601	0.0197212	0	5.3583	6.99341	9.08264	8.08484	NUCKS1	nuclear casein kinase and cyclin-dependent kinase substrate 1	64710	611912	1
7910014	-2.35	0.196131	4.79e-05	0.000337308	-1	-4.52	0.0437055	2.19e-09	5.6e-08	-1	-2.17	0.222838	7.89e-05	0.000833305	-1	2.93	7.61253	1.52e-07	1.48e-06	1	0.58	1.49305	0.166578	0.401515	0	-1.59	0.332709	0.000322255	0.0035586	-1	2.85902	5.20913	7.37506	5.7874	CNIH4	cornichon homolog 4 (Drosophila)	29097	NA	1
7910494	-1.2	0.435976	0.000126821	0.000669376	-1	-2.28	0.205406	2.85e-08	2.96e-07	-1	-1.09	0.471142	0.000329235	0.00213024	-1	1.3	2.47065	9.04e-06	3.19e-05	1	0.11	1.07715	0.642784	0.813644	0	-0.98	0.507488	0.000186203	0.00244638	0	4.39827	5.59595	6.68171	5.70316	ARV1	ARV1 homolog (S. cerevisiae)	64801	611647	1
7910520	-1.11	0.463894	9.48e-05	0.00054487	-1	-2.35	0.195903	2.63e-09	6.22e-08	-1	-1.24	0.422301	1.98e-05	0.000341093	-1	1.6	3.02642	7.33e-08	9.16e-07	1	0.49	1.40394	0.025736	0.157029	0	-0.75	0.592885	0.000868007	0.00682603	0	4.5598	5.66793	6.91159	6.15741	GNPAT	glyceronephosphate O-acyltransferase	8443	222765, 602744	1
7911989	-2.32	0.200174	9.37e-06	0.000113476	-1	-3.53	0.0863096	3.28e-08	3.23e-07	-1	-1.21	0.431172	0.00612881	0.017271	-1	2.56	5.89654	7.01e-07	4.5e-06	1	0.24	1.18033	0.518456	0.729736	0	-0.97	0.508928	0.0100881	0.0353017	0	4.19378	6.51445	7.72811	6.75364	RPL22	ribosomal protein L22	6146	180474	1
7913814	-1.55	0.341425	1.02e-07	8.13e-06	-1	-2.58	0.167566	3.97e-11	4.98e-09	-1	-1.03	0.490785	3.8e-05	0.000520316	-1	1.98	3.93884	2.18e-10	1.88e-08	1	0.43	1.34482	0.0255956	0.156639	0	-0.6	0.660017	0.00213026	0.012351	0	5.20883	6.75919	7.78603	7.1866	SYF2	SYF2 homolog, RNA splicing factor (S. cerevisiae)	25949	607090	1
7914180	-1.93	0.262634	0.00122505	0.00363986	-1	-3.55	0.0853348	1.66e-06	6.01e-06	-1	-1.62	0.324919	0.0045928	0.0139649	-1	2.02	4.04873	0.000234478	0.000487834	1	0.09	1.06333	0.848929	0.928614	0	-1.53	0.345498	0.00207267	0.0121416	-1	3.97485	5.90372	7.52557	5.99232	SPCS2	signal peptidase complex subunit 2 homolog (S. cerevisiae)	9789	NA	11
7914212	-1.1	0.466321	0.00626406	0.0132033	-1	-2.39	0.190947	2.03e-06	7.02e-06	-1	-1.29	0.409475	0.00147256	0.00614842	-1	2.09	4.26148	1.09e-06	6.19e-06	1	0.99	1.98722	0.00515218	0.0709712	0	-0.3	0.813717	0.332306	0.445151	0	5.10983	6.21043	7.49858	7.20118	SNORA61	small nucleolar RNA, H/ACA box 61	677838	NA	1
7915758	-1.74	0.298879	1.59e-05	0.000160696	-1	-2.76	0.147605	3.62e-08	3.45e-07	-1	-1.02	0.49386	0.00371651	0.0119732	-1	1.93	3.80431	5.33e-07	3.7e-06	1	0.19	1.13703	0.513475	0.72463	0	-0.83	0.561534	0.00504688	0.0221734	0	4.69435	6.43672	7.45454	6.62199	GPBP1L1	GC-rich promoter binding protein 1-like 1	60313	NA	1
7916077	-1.08	0.473147	0.00164709	0.00456969	-1	-2.33	0.198557	2.65e-07	1.45e-06	-1	-1.25	0.419652	0.000373558	0.00234272	-1	1.6	3.02417	4.37e-06	1.8e-05	1	0.52	1.43088	0.0642361	0.249437	0	-0.74	0.60047	0.00860585	0.0318344	0	5.57585	6.65549	7.90822	7.17239	NRD1	nardilysin (N-arginine dibasic convertase)	4898	602651	1
7916372	-1.02	0.494365	0.00347173	0.0081982	-1	-2.3	0.202805	3.91e-07	1.95e-06	-1	-1.29	0.410234	0.000351613	0.00223918	-1	1.26	2.39559	0.000129374	0.000292006	1	0.24	1.1843	0.381919	0.622633	0	-1.04	0.485839	0.000576653	0.00519226	-1	6.03277	7.04912	8.3346	7.29315	TMEM59	transmembrane protein 59	9528	NA	1
7916843	-1.57	0.335787	3.52e-06	6.13e-05	-1	-2.98	0.126308	2.72e-10	1.69e-08	-1	-1.41	0.376156	1.55e-05	0.000294317	-1	1.75	3.36605	8.42e-08	9.89e-07	1	0.18	1.13027	0.442234	0.67308	0	-1.23	0.42516	1.14e-05	0.000354767	-1	5.48711	7.0615	8.47209	7.23817	GNG12	guanine nucleotide binding protein (G protein), gamma 12	55970	NA	1
7917455	-1.87	0.273541	1.38e-05	0.000145011	-1	-3.09	0.117563	1.38e-08	1.83e-07	-1	-1.22	0.429783	0.00135341	0.00580732	-1	2.25	4.77135	1.26e-07	1.32e-06	1	0.38	1.30516	0.208734	0.451101	0	-0.83	0.560936	0.00751469	0.0288424	0	4.45614	6.32631	7.54463	6.71054	2012-09-15	15 kDa selenoprotein	9403	606254	1
7917604	-1.35	0.393085	6.46e-05	0.000411601	-1	-2.53	0.173434	1.98e-08	2.35e-07	-1	-1.18	0.441213	0.000290051	0.001944	-1	2.14	4.4112	8.5e-09	2.04e-07	1	0.79	1.73398	0.00330372	0.0575046	0	-0.39	0.765053	0.114592	0.201287	0	3.29903	4.64612	5.82657	5.4402	ZNF644	zinc finger protein 644	84146	NA	1, 1
7917850	-1.18	0.441587	1.03e-05	0.000120872	-1	-2.3	0.203253	1.01e-09	3.56e-08	-1	-1.12	0.460279	2.34e-05	0.000379895	-1	1.84	3.59238	2.15e-09	8.35e-08	1	0.67	1.58635	0.0016822	0.0418395	0	-0.45	0.730163	0.0209643	0.0591355	0	3.42824	4.60747	5.72689	5.27318	ARHGAP29	Rho GTPase activating protein 29	9411	610496	1
7918284	-1.6	0.329607	0.0101461	0.0195225	-1	-2.99	0.125988	4.65e-05	9.72e-05	-1	-1.39	0.382238	0.0209056	0.0435441	-1	1.9	3.7395	0.000779284	0.00139212	1	0.3	1.23257	0.550746	0.753229	0	-1.09	0.471133	0.0311458	0.0782835	0	5.37137	6.97255	8.36001	7.27422	TAF13	TAF13 RNA polymerase II, TATA box binding protein (TBP)-associated factor, 18kDa	6884	600774	1
7918345	-1.46	0.362387	0.000281286	0.00120154	-1	-3.1	0.116274	1.38e-08	1.83e-07	-1	-1.64	0.320857	6.64e-05	0.00074681	-1	1.31	2.48677	0.000179975	0.000386885	1	-0.15	0.901173	0.618718	0.797266	0	-1.79	0.289148	2.34e-06	0.000115628	-1	3.99937	5.46377	7.10376	5.31364	PSMA5	proteasome (prosome, macropain) subunit, alpha type, 5	5686	176844	1
7918825	-1.14	0.455151	0.000865509	0.00278589	-1	-2.26	0.208461	1.85e-07	1.1e-06	-1	-1.13	0.458004	0.000729423	0.00372063	-1	1.58	2.99712	2.28e-06	1.08e-05	1	0.45	1.36414	0.0952459	0.30204	0	-0.68	0.624781	0.0103018	0.0357792	0	7.21594	8.35152	9.47809	8.79951	CSDE1	cold shock domain containing E1, RNA-binding	7812	191510	1, 1, 1
7919095	-1.09	0.470653	5.69e-06	8.26e-05	-1	-2.12	0.229675	4.08e-10	2.13e-08	-1	-1.04	0.487992	1.24e-05	0.000254039	-1	1.12	2.16692	6.31e-07	4.16e-06	1	0.03	1.01987	0.862525	0.936459	0	-1.01	0.497686	2.21e-06	0.000112554	-1	4.66584	5.7531	6.78817	5.78148	NOTCH2	Notch homolog 2 (Drosophila)	4853	600275, 610205	1
7919251	-1.43	0.370742	0.000157764	0.000787092	-1	-2.6	0.165048	4.79e-08	4.17e-07	-1	-1.17	0.445184	0.000923946	0.00440264	-1	2.13	4.37624	4.72e-08	6.72e-07	1	0.7	1.62245	0.0179355	0.131194	0	-0.47	0.722291	0.0798343	0.154373	0	3.73351	5.16502	6.33255	5.8632	GPR89B	G protein-coupled receptor 89B	51463	NA	1
7921583	-1.66	0.315774	2.96e-06	5.44e-05	-1	-2.7	0.153439	2.2e-09	5.61e-08	-1	-1.04	0.485915	0.000670078	0.00351967	-1	2.08	4.23403	6.12e-09	1.68e-07	1	0.42	1.337	0.0868352	0.290008	0	-0.62	0.649666	0.0105326	0.0362736	0	4.18227	5.84531	6.88654	6.26431	COPA	coatomer protein complex, subunit alpha	1314	601924	1
7922400	-1.31	0.403437	0.0105376	0.0201048	-1	-2.67	0.157375	2.18e-05	5.09e-05	-1	-1.36	0.390087	0.007824	0.0206231	-1	1.49	2.80098	0.00164556	0.00271143	1	0.18	1.13002	0.674196	0.831803	0	-1.18	0.440805	0.00697416	0.0275613	-1	5.11381	6.4234	7.78153	6.59974	---	---	NA	NA
7922402	-1.9	0.268022	0.0274553	0.0448534	-1	-4.02	0.0617138	8.41e-05	0.000163034	-1	-2.12	0.230257	0.0133817	0.0308729	-1	3	7.97719	0.000276174	0.000562695	1	1.1	2.13806	0.133825	0.36018	0	-1.02	0.492303	0.139658	0.23218	0	3.62893	5.5285	7.64719	6.62481	SNORD47	small nucleolar RNA, C/D box 47	26802	NA	1
7923453	-1.41	0.3767	0.000164272	0.000811415	-1	-2.48	0.178729	1.49e-07	9.52e-07	-1	-1.08	0.474461	0.00203358	0.00766784	-1	1.62	3.07991	5.03e-06	2.01e-05	1	0.21	1.1602	0.441383	0.672363	0	-0.86	0.55047	0.00336739	0.0167238	0	4.39331	5.80182	6.87746	6.0162	JARID1B	jumonji, AT rich interactive domain 1B	10765	605393	1
7923503	-1.29	0.408064	7.12e-05	0.000441358	-1	-2.31	0.202241	7.05e-08	5.54e-07	-1	-1.01	0.495612	0.00104402	0.00480192	-1	1.25	2.38602	2.84e-05	8.06e-05	1	-0.04	0.973647	0.871822	0.94206	0	-1.05	0.482551	0.000163496	0.00222285	-1	5.59909	6.89223	7.90495	6.8537	ADIPOR1	adiponectin receptor 1	51094	607945	1, 1
7923974	-1.51	0.350063	0.00121738	0.00362495	-1	-2.76	0.147204	1.08e-06	4.24e-06	-1	-1.25	0.420508	0.00452799	0.0138449	-1	3.02	8.09535	1.1e-08	2.39e-07	1	1.5	2.83388	0.000331636	0.0200283	1	0.25	1.19167	0.452965	0.557699	0	3.33109	4.8454	6.09519	6.34818	hsa-mir-29c /// EU154352	hsa-mir-29c /// EU154352	NA	NA
7924351	-1.23	0.426834	0.00123617	0.00366491	-1	-2.35	0.196176	8.35e-07	3.5e-06	-1	-1.12	0.459606	0.00234056	0.00842987	-1	1.44	2.71056	4.95e-05	0.000128342	1	0.21	1.15696	0.476816	0.698925	0	-0.91	0.531745	0.00330808	0.016595	0	4.06561	5.29387	6.4154	5.5042	EPRS	glutamyl-prolyl-tRNA synthetase	2058	138295	1
7924582	-1.68	0.312662	2.14e-06	4.45e-05	-1	-3.4	0.095028	3.38e-11	4.71e-09	-1	-1.72	0.303932	1.35e-06	6.42e-05	-1	2.42	5.35224	4.3e-10	2.92e-08	1	0.74	1.67344	0.0040895	0.063061	0	-0.98	0.508612	0.000247007	0.00298347	0	3.87004	5.54736	7.26554	6.29018	WDR26	WD repeat domain 26	80232	NA	1
7925550	-1.18	0.441398	0.000846805	0.00274349	-1	-2.32	0.200527	1.87e-07	1.12e-06	-1	-1.14	0.4543	0.000880585	0.00426095	-1	1.8	3.47598	4.83e-07	3.43e-06	1	0.62	1.53429	0.0295292	0.167419	0	-0.52	0.697029	0.0474366	0.105392	0	4.45729	5.63714	6.77542	6.25471	ADSS	adenylosuccinate synthase	159	103060	1
7926207	-1.33	0.399116	0.00105569	0.00324971	-1	-2.52	0.174095	6.45e-07	2.89e-06	-1	-1.2	0.436201	0.00216944	0.0080008	-1	1.7	3.25559	1.32e-05	4.29e-05	1	0.38	1.29936	0.234	0.479577	0	-0.82	0.566781	0.0104814	0.0361656	0	5.50668	6.8318	8.02873	7.2096	CDC123	cell division cycle 123 homolog (S. cerevisiae)	8872	NA	10
7926596	-1.05	0.484341	4.71e-05	0.000333628	-1	-2.06	0.239923	2.95e-09	6.8e-08	-1	-1.01	0.495358	5.57e-05	0.00067014	-1	1.57	2.97309	1e-08	2.25e-07	1	0.53	1.43999	0.00820767	0.0900784	0	-0.49	0.713312	0.00980752	0.0347395	0	5.06091	6.10682	7.12027	6.63288	COMMD3	COMM domain containing 3	23412	NA	10
7926836	-1.27	0.413556	0.00281006	0.0069104	-1	-2.69	0.155133	1.08e-06	4.25e-06	-1	-1.41	0.375119	0.00108588	0.00493956	-1	1.88	3.68742	1.01e-05	3.46e-05	1	0.61	1.52496	0.0813367	0.280146	0	-0.81	0.57204	0.0200851	0.0573557	0	4.5305	5.80435	7.21893	6.41312	RAB18	RAB18, member RAS oncogene family	22931	602207	10
7927106	-1.42	0.372437	0.000817459	0.00266497	-1	-2.44	0.183837	2.43e-06	8.12e-06	-1	-1.02	0.493607	0.0103404	0.0253036	-1	2.34	5.08059	5.11e-07	3.58e-06	1	0.92	1.8922	0.0104726	0.101576	0	-0.1	0.934002	0.756282	0.816728	0	4.57598	6.00091	7.01948	6.92097	---	---	NA	NA
7927536	-1.32	0.399798	5.43e-05	0.000367751	-1	-2.68	0.156181	3.04e-09	6.89e-08	-1	-1.36	0.390649	3.64e-05	0.000504094	-1	1.33	2.50838	7.71e-06	2.82e-05	1	0	1.00285	0.986079	0.993024	0	-1.35	0.391762	4.43e-06	0.000176654	-1	4.48967	5.81233	7.16838	5.81643	NCOA4	nuclear receptor coactivator 4	8031	188550, 601984	10, 10, 10
7927548	-1.44	0.368805	0.00256458	0.00643411	-1	-2.74	0.149535	1.91e-06	6.7e-06	-1	-1.3	0.405458	0.00425958	0.0132416	-1	1.52	2.85914	0.000312739	0.000626798	1	0.08	1.05446	0.836971	0.921682	0	-1.23	0.427541	0.0016331	0.0104394	-1	4.08699	5.52606	6.82844	5.60257	TIMM23	translocase of inner mitochondrial membrane 23 homolog (yeast)	NA	NA
7927786	-1.5	0.352645	6.86e-05	0.000429546	-1	-2.53	0.172882	8.18e-08	6.09e-07	-1	-1.03	0.490243	0.00261258	0.00914153	-1	1.74	3.34862	1.18e-06	6.59e-06	1	0.24	1.18087	0.382143	0.622813	0	-0.79	0.578915	0.00559738	0.0236967	0	4.29641	5.80012	6.82855	6.03998	REEP3	receptor accessory protein 3	221035	609348	10
7927799	-1.64	0.320834	0.000790254	0.00259096	-1	-3.06	0.119955	7.04e-07	3.08e-06	-1	-1.42	0.373887	0.00257905	0.00906774	-1	2.34	5.05939	2.12e-06	1.02e-05	1	0.7	1.62322	0.0728164	0.266933	0	-0.72	0.606902	0.0553875	0.118158	0	4.24856	5.88866	7.30799	6.58753	REEP3	receptor accessory protein 3	221035	609348	10
7927972	-1.73	0.300611	2.2e-05	0.00020111	-1	-2.99	0.125818	1.7e-08	2.11e-07	-1	-1.26	0.41854	0.000784667	0.00391291	-1	1.88	3.68134	1.12e-06	6.35e-06	1	0.15	1.10665	0.613115	0.793507	0	-1.11	0.463178	0.000573295	0.00518277	-1	4.70207	6.4361	7.69266	6.5823	VPS26A	vacuolar protein sorting 26 homolog A (S. pombe)	9559	605506	10
7928171	-1.56	0.339219	2.56e-06	4.92e-05	-1	-2.82	0.14202	4.4e-10	2.19e-08	-1	-1.26	0.418669	4.49e-05	0.000574823	-1	1.52	2.8758	4.85e-07	3.44e-06	1	-0.04	0.975526	0.871781	0.94206	0	-1.29	0.408422	3.89e-06	0.000158734	-1	4.55723	6.11695	7.37306	6.0812	SGPL1	sphingosine-1-phosphate lyase 1	8879	603729	10
7928489	-1.68	0.311221	2.03e-05	0.000189147	-1	-3.2	0.109017	2.05e-09	5.4e-08	-1	-1.51	0.35029	6.59e-05	0.000742239	-1	2.68	6.40819	8.81e-10	4.58e-08	1	1	1.99436	0.00135469	0.039243	0	-0.52	0.698605	0.0601051	0.12543	0	2.28726	3.97125	5.48463	4.96717	---	---	NA	NA
7928671	-1.19	0.438746	0.00376905	0.00876026	-1	-2.72	0.151485	2.13e-07	1.23e-06	-1	-1.53	0.345267	0.000257901	0.00179447	-1	1.05	2.07326	0.00219936	0.00352769	1	-0.14	0.909633	0.670898	0.829497	0	-1.67	0.314067	9.89e-06	0.000314152	-1	4.20491	5.39345	6.92767	5.25681	C10orf57	chromosome 10 open reading frame 57	80195	NA	10
7928907	-1.62	0.325386	1.22e-06	3.2e-05	-1	-3.32	0.100429	9.26e-12	2.53e-09	-1	-1.7	0.308645	4.67e-07	3.07e-05	-1	2.93	7.64215	4.26e-12	2.05e-09	1	1.31	2.48665	4.34e-06	0.00249729	1	-0.38	0.767492	0.0781245	0.151953	0	4.86022	6.47999	8.17597	7.7942	---	---	NA	NA
7929132	-1.02	0.492465	0.00323235	0.00774674	-1	-2.17	0.221787	1.1e-06	4.29e-06	-1	-1.15	0.45036	0.00106861	0.00487115	-1	1.74	3.33953	1.78e-06	8.98e-06	1	0.72	1.6446	0.0150453	0.120799	0	-0.43	0.740662	0.110917	0.196761	0	3.92231	4.94422	6.09507	5.66195	PCGF5	polycomb group ring finger 5	84333	NA	10
7929201	-1.27	0.414903	0.00170426	0.00467954	-1	-2.61	0.16424	6.74e-07	2.98e-06	-1	-1.34	0.395852	0.0010227	0.00473093	-1	2.19	4.54741	5.24e-07	3.66e-06	1	0.92	1.88674	0.00791197	0.0886125	0	-0.42	0.746868	0.178149	0.278909	0	5.00518	6.27433	7.6113	7.19023	BTAF1	BTAF1 RNA polymerase II, B-TFIID transcription factor-associated, 170kDa (Mot1 homolog, S. cerevisiae)	9044	605191	10
7930454	-1.28	0.411957	8.27e-05	0.000490116	-1	-2.7	0.153642	8.91e-10	3.28e-08	-1	-1.42	0.372957	1.32e-05	0.000266953	-1	1.9	3.74237	1.92e-08	3.59e-07	1	0.62	1.5417	0.012903	0.112027	0	-0.8	0.574986	0.00111005	0.00803039	0	6.94272	8.22215	9.64507	8.84667	PDCD4	programmed cell death 4 (neoplastic transformation inhibitor)	27250	608610	10
7930882	-1.23	0.426684	2.56e-05	0.000219816	-1	-2.33	0.198974	2.8e-09	6.52e-08	-1	-1.1	0.466327	8.37e-05	0.000862707	-1	1.43	2.69631	4.69e-07	3.36e-06	1	0.2	1.15047	0.333563	0.579541	0	-0.9	0.536497	0.000138381	0.0019982	0	4.4841	5.71286	6.81345	5.91509	FAM45A	family with sequence similarity 45, member A	404636	NA	10
7931081	-1.33	0.398999	0.000245718	0.00108655	-1	-2.71	0.152755	2.56e-08	2.74e-07	-1	-1.39	0.382844	0.000138692	0.00119562	-1	2.1	4.29904	7.72e-08	9.41e-07	1	0.78	1.71531	0.00818827	0.0899557	0	-0.61	0.656698	0.0278536	0.0725788	0	4.85167	6.17721	7.56238	6.95568	PLEKHA1	pleckstrin homology domain containing, family A (phosphoinositide binding specific) member 1	59338	603075, 607772	10, 10
7931873	-1.12	0.460141	0.000710558	0.00238401	-1	-2.3	0.202665	7.26e-08	5.67e-07	-1	-1.18	0.440442	0.00030816	0.00203489	-1	1.54	2.91378	1.91e-06	9.45e-06	1	0.42	1.34075	0.102073	0.3133	0	-0.76	0.590523	0.00352226	0.0172731	0	5.35689	6.47674	7.65972	6.89978	GDI2	GDP dissociation inhibitor 2	2665	600767	10
7932616	-1.53	0.347477	4.37e-06	7.05e-05	-1	-2.93	0.131407	1.74e-10	1.22e-08	-1	-1.4	0.378176	1.09e-05	0.000235822	-1	2.05	4.13337	3.18e-09	1.07e-07	1	0.52	1.43625	0.0271591	0.160618	0	-0.88	0.543155	0.00037933	0.00390438	0	4.72687	6.25189	7.65476	6.77419	ABI1	abl-interactor 1	10006	603050	10
7932678	-1.68	0.312247	6.08e-05	0.000395862	-1	-2.89	0.134645	4.07e-08	3.75e-07	-1	-1.21	0.431214	0.00144349	0.00605014	-1	2.07	4.20772	4e-07	2.98e-06	1	0.39	1.31385	0.199201	0.439456	0	-0.82	0.566549	0.00820274	0.0307956	0	4.88394	6.56318	7.77671	6.95698	YME1L1	YME1-like 1 (S. cerevisiae)	10730	607472	10
7932911	-1.66	0.317024	2.59e-05	0.000221508	-1	-2.75	0.149137	4.58e-08	4.04e-07	-1	-1.09	0.470427	0.00217668	0.00801627	-1	2.2	4.58808	8.68e-08	1.01e-06	1	0.54	1.45453	0.0651662	0.250998	0	-0.55	0.684252	0.0551628	0.117839	0	5.5013	7.15864	8.2466	7.6992	KIF5B	kinesin family member 5B	3799	602809	10
7933582	-1.45	0.366236	2.63e-05	0.000223145	-1	-2.78	0.145345	2.05e-09	5.4e-08	-1	-1.33	0.396862	5.98e-05	0.000700667	-1	2.12	4.33204	1.26e-08	2.64e-07	1	0.67	1.58655	0.0116401	0.106357	0	-0.67	0.629642	0.00826149	0.030948	0	4.90485	6.35401	7.68729	7.0199	TIMM23	translocase of inner mitochondrial membrane 23 homolog (yeast)	10431	605034	10
7933877	-1.01	0.497146	0.00207743	0.00544044	-1	-2.54	0.172035	4.24e-08	3.84e-07	-1	-1.53	0.346045	2.54e-05	0.000397231	-1	1.82	3.52386	3.13e-07	2.5e-06	1	0.81	1.75187	0.00428489	0.0651568	0	-0.72	0.606227	0.0078966	0.0299402	0	4.10979	5.11805	6.64902	5.92695	JMJD1C	jumonji domain containing 1C	221037	604503	10, 10
7933947	-1.3	0.405594	0.00149737	0.00423487	-1	-2.92	0.13231	1.45e-07	9.38e-07	-1	-1.62	0.326212	0.000172567	0.00137789	-1	2.33	5.0365	1.96e-07	1.78e-06	1	1.03	2.04277	0.00357376	0.0600074	0	-0.59	0.666378	0.0692221	0.138813	0	3.22286	4.52475	6.14087	5.55528	HERC4	hect domain and RLD 4	26091	609248	10
7934367	-1.07	0.476113	0.00502722	0.0110435	-1	-2.22	0.214478	2.96e-06	9.5e-06	-1	-1.15	0.450478	0.00246886	0.00876205	-1	1.45	2.73876	6.67e-05	0.000164883	1	0.38	1.30396	0.216615	0.460496	0	-0.77	0.587404	0.0133609	0.0430312	0	5.25958	6.33021	7.48068	6.71311	ANXA7	annexin A7	310	186360	10
7934393	-1.25	0.419613	9.83e-06	0.000116933	-1	-2.45	0.182413	4.73e-10	2.27e-08	-1	-1.2	0.434717	1.53e-05	0.000292116	-1	1.97	3.92884	4.37e-10	2.95e-08	1	0.72	1.64859	0.00107619	0.0358896	0	-0.48	0.716672	0.0164377	0.0500084	0	3.33713	4.59	5.79185	5.31124	PPP3CB	protein phosphatase 3 (formerly 2B), catalytic subunit, beta isoform	5532	114106	10
7934852	-1.8	0.286712	5.41e-05	0.000366541	-1	-3.25	0.105455	1.73e-08	2.14e-07	-1	-1.44	0.367809	0.000515219	0.0029407	-1	2.39	5.23298	1.29e-07	1.34e-06	1	0.59	1.50036	0.0784705	0.275551	0	-0.86	0.551846	0.00941529	0.0339106	0	4.42859	6.23091	7.67388	6.81622	GLUD1	glutamate dehydrogenase 1	2746	138130, 606762	10
7935320	-1.18	0.44157	0.00196801	0.00522487	-1	-2.32	0.20092	1.46e-06	5.38e-06	-1	-1.14	0.455012	0.00244312	0.00869612	-1	1.58	2.99794	2.03e-05	6.12e-05	1	0.4	1.3238	0.184738	0.42344	0	-0.73	0.602346	0.0169718	0.0511071	0	5.34663	6.52591	7.66194	6.9306	TM9SF3	transmembrane 9 superfamily member 3	56889	NA	10
7935692	-1.34	0.396264	0.00236771	0.00604298	-1	-2.49	0.177633	4.2e-06	1.27e-05	-1	-1.16	0.448269	0.00644552	0.017899	-1	1.52	2.87684	0.000180741	0.000388226	1	0.19	1.13999	0.586036	0.776819	0	-0.97	0.511022	0.00731023	0.0284084	0	4.58755	5.92301	7.08058	6.11203	ERLIN1	ER lipid raft associated 1	10613	611604	10, 10
7935861	-1.19	0.437824	0.0124802	0.0231026	-1	-2.25	0.210277	6.69e-05	0.000133276	-1	-1.06	0.480277	0.0224477	0.0460108	-1	2.21	4.64217	5.47e-06	2.15e-05	1	1.02	2.03246	0.0136514	0.115142	0	-0.03	0.976142	0.924708	0.948572	0	3.55778	4.74936	5.80742	5.77258	---	---	NA	NA
7935910	-1.42	0.3742	0.00216292	0.0056252	-1	-2.59	0.166435	4.84e-06	1.42e-05	-1	-1.17	0.444775	0.00836429	0.0217067	-1	2.2	4.60454	3.48e-06	1.5e-05	1	0.78	1.72302	0.0401792	0.197079	0	-0.38	0.766355	0.276995	0.387142	0	5.50846	6.92658	8.09543	7.71152	MGEA5	meningioma expressed antigen 5 (hyaluronidase)	10724	604039	10
7936419	-1.15	0.450131	0.000941034	0.00296525	-1	-2.17	0.222915	8.99e-07	3.7e-06	-1	-1.01	0.495223	0.00267561	0.00930548	-1	1.62	3.08027	3.91e-06	1.65e-05	1	0.47	1.38652	0.0906975	0.295064	0	-0.54	0.686638	0.0460896	0.103197	0	5.87364	7.02523	8.03907	7.4967	C10orf118	chromosome 10 open reading frame 118	55088	NA	10
7936949	-1.05	0.482319	0.00166423	0.00459752	-1	-2.15	0.225072	6.43e-07	2.88e-06	-1	-1.1	0.466646	0.00104652	0.00481033	-1	1.37	2.58449	2.28e-05	6.75e-05	1	0.32	1.24655	0.231407	0.476727	0	-0.78	0.581697	0.00471697	0.0212137	0	4.52526	5.5772	6.6768	5.89514	DHX32	DEAH (Asp-Glu-Ala-His) box polypeptide 32	55760	607960	10
7937915	-1.04	0.485955	0.00107123	0.00328921	-1	-2.18	0.221034	2.37e-07	1.33e-06	-1	-1.14	0.454844	0.000447632	0.00265928	-1	1.19	2.27445	6.85e-05	0.000168982	1	0.14	1.10528	0.559456	0.760434	0	-0.99	0.502731	0.000363297	0.00380748	0	4.02936	5.07046	6.20702	5.21488	RRM1	ribonucleotide reductase M1	6240	180410	11
7938313	-1.13	0.455468	0.00285403	0.00700437	-1	-2.56	0.169468	2.75e-07	1.49e-06	-1	-1.43	0.372074	0.00028769	0.00193641	-1	1.94	3.84767	9.22e-07	5.51e-06	1	0.81	1.75249	0.0119103	0.107604	0	-0.62	0.652057	0.0386256	0.0907212	0	3.66428	4.79886	6.22519	5.60826	IPO7	importin 7	10527	605586	11
7938366	-1.06	0.481238	0.0135657	0.0248095	-1	-3.01	0.124462	2.59e-07	1.42e-06	-1	-1.95	0.25863	4.69e-05	0.000594694	-1	2.49	5.62918	2.61e-07	2.2e-06	1	1.44	2.70898	0.000401195	0.0225715	1	-0.51	0.700622	0.132869	0.224343	0	4.03688	5.09206	7.0431	6.52981	WEE1	WEE1 homolog (S. pombe)	7465	193525	11, 11
7938448	-1.21	0.430817	0.00154035	0.00433947	-1	-2.3	0.202599	1.94e-06	6.78e-06	-1	-1.09	0.470267	0.00367191	0.0118687	-1	1.89	3.71413	1.81e-06	9.1e-06	1	0.68	1.60011	0.0319506	0.175064	0	-0.41	0.752479	0.166219	0.264899	0	4.72633	5.94118	7.02963	6.61936	USP47	ubiquitin specific peptidase 47	55031	NA	11
7938687	-1.38	0.385177	4.17e-06	6.82e-05	-1	-2.79	0.144572	5.69e-11	6.22e-09	-1	-1.41	0.375338	2.21e-06	8.45e-05	-1	1.77	3.413	1.36e-08	2.79e-07	1	0.39	1.31461	0.0630708	0.246486	0	-1.02	0.493422	2.35e-05	0.000580314	-1	5.24138	6.61779	8.03153	7.01242	NUCB2	nucleobindin 2	4925	608020	11
7939120	-1.77	0.294111	3.93e-05	0.000294092	-1	-2.81	0.142384	1.13e-07	7.74e-07	-1	-1.05	0.484115	0.00571259	0.0163982	-1	2.47	5.5298	5.21e-08	7.21e-07	1	0.7	1.62637	0.0314183	0.173539	0	-0.34	0.787352	0.251635	0.360737	0	4.96319	6.72876	7.77534	7.43042	RCN1	reticulocalbin 1, EF-hand calcium binding domain	5954	602735	11
7939137	-1.21	0.430865	0.00517031	0.0112966	-1	-3.05	0.120801	2.17e-07	1.25e-06	-1	-1.83	0.280369	9.72e-05	0.000943175	-1	1.6	3.03708	0.000114367	0.000262857	1	0.39	1.30857	0.27211	0.520096	0	-1.45	0.366882	0.000232516	0.00284937	-1	5.51912	6.73381	8.56842	7.12181	EIF3M	eukaryotic translation initiation factor 3, subunit M	10480	609641	11
7939197	-1.26	0.41655	0.000197845	0.000926635	-1	-2.65	0.159758	9.43e-09	1.4e-07	-1	-1.38	0.383526	5.86e-05	0.000691506	-1	1.89	3.70044	8.06e-08	9.6e-07	1	0.62	1.54142	0.0192284	0.136484	0	-0.76	0.591175	0.00399265	0.0188852	0	4.8094	6.07284	7.45544	6.6971	HIPK3	homeodomain interacting protein kinase 3	10114	604424	11
7939298	-1.62	0.326336	0.000245299	0.00108513	-1	-3.05	0.121019	4.74e-08	4.14e-07	-1	-1.43	0.370842	0.000609115	0.0032954	-1	1.97	3.91917	2.09e-06	1.01e-05	1	0.35	1.27896	0.280821	0.527913	0	-1.08	0.474294	0.00162388	0.0104082	-1	4.40782	6.02339	7.45451	6.37836	CAT	catalase	847	115500	11
7939424	-1.48	0.359294	1.17e-05	0.000131041	-1	-2.56	0.169584	3.86e-09	7.98e-08	-1	-1.08	0.471991	0.00036381	0.00229475	-1	1.44	2.71075	1.62e-06	8.38e-06	1	-0.04	0.973955	0.869317	0.940788	0	-1.12	0.459698	3.52e-05	0.000774368	-1	5.11398	6.59074	7.67391	6.55267	API5	apoptosis inhibitor 5	8539	609774	11
7940028	-1.06	0.480384	0.00136371	0.00394359	-1	-2.29	0.204214	1.57e-07	9.84e-07	-1	-1.23	0.425106	0.000268547	0.00184738	-1	1.26	2.39678	5.19e-05	0.000133214	1	0.2	1.15138	0.431807	0.663427	0	-1.03	0.489457	0.000329495	0.00358379	-1	6.08336	7.1411	8.37521	7.34446	SERPING1	serpin peptidase inhibitor, clade G (C1 inhibitor), member 1	710	106100, 120790, 606860	11, 11
7940630	-1.35	0.392553	0.00286657	0.00702669	-1	-3.19	0.109952	1.98e-07	1.17e-06	-1	-1.84	0.280095	0.00014114	0.0012072	-1	1.05	2.07327	0.00699237	0.0101465	1	-0.3	0.813867	0.411058	0.646979	0	-2.13	0.22796	2.75e-06	0.000128793	-1	5.34295	6.69199	8.528	6.39485	SCGB1D2	secretoglobin, family 1D, member 2	10647	NA	11
7942553	-1.98	0.253178	0.00109869	0.00335443	-1	-3.54	0.0862598	2.32e-06	7.83e-06	-1	-1.55	0.340708	0.00704726	0.0191864	-1	2.09	4.26991	0.000189168	0.000404024	1	0.11	1.08105	0.811994	0.908207	0	-1.44	0.368321	0.00393136	0.0186784	-1	4.58885	6.57063	8.12402	6.68306	SPCS2	signal peptidase complex subunit 2 homolog (S. cerevisiae)	9789	NA	11
7942793	-1.41	0.376119	0.00564015	0.0120958	-1	-2.78	0.145619	1.14e-05	2.91e-05	-1	-1.37	0.387161	0.00679498	0.0186529	-1	1.1	2.13802	0.0104371	0.0146379	1	-0.31	0.804149	0.441394	0.672363	0	-1.68	0.311335	0.000272376	0.00323273	-1	5.9543	7.36504	8.73403	7.05057	THRSP	thyroid hormone responsive (SPOT14 homolog, rat)	7069	601926	11
7942879	-1.35	0.392893	3.52e-05	0.000273442	-1	-2.72	0.151922	1.17e-09	3.91e-08	-1	-1.37	0.386675	2.22e-05	0.000368918	-1	2	4.00917	8.96e-09	2.11e-07	1	0.66	1.57518	0.00889368	0.0936579	0	-0.72	0.609082	0.00326011	0.0164985	0	4.5431	5.89089	7.26169	6.5464	TMEM126B	transmembrane protein 126B	55863	NA	11
7943158	-3.1	0.11701	1.29e-06	3.29e-05	-1	-4.23	0.0532662	1.63e-08	2.05e-07	-1	-1.14	0.455226	0.0223754	0.0459143	-1	4.24	18.8817	5.19e-10	3.26e-08	1	1.14	2.20936	0.0110937	0.103636	0	0.01	1.00576	0.98331	0.987976	0	2.88598	5.98127	7.11662	7.1249	SCARNA9	small Cajal body-specific RNA 9	619383	NA	11
7943162	-1.07	0.475968	0.00805113	0.0161867	-1	-2.39	0.191103	3.5e-06	1.09e-05	-1	-1.32	0.401504	0.0015098	0.00624145	-1	1.56	2.95762	7.13e-05	0.000174992	1	0.49	1.40773	0.141258	0.37073	0	-0.82	0.565211	0.0144285	0.0454782	0	3.95846	5.02952	6.34604	5.5229	C11orf54	chromosome 11 open reading frame 54	28970	NA	11
7944285	-1.54	0.34278	2.6e-05	0.000221508	-1	-2.76	0.147662	8.96e-09	1.36e-07	-1	-1.21	0.430779	0.000365363	0.00230322	-1	1.94	3.82977	1.5e-07	1.47e-06	1	0.39	1.31277	0.141553	0.371326	0	-0.82	0.565513	0.00302204	0.015708	0	4.63928	6.18392	7.39891	6.57654	ARCN1	archain 1	372	600820	11
7944560	-1.52	0.348575	3.58e-05	0.000275794	-1	-2.77	0.14639	9.53e-09	1.41e-07	-1	-1.25	0.419967	0.000293908	0.00196256	-1	2.23	4.67977	1.62e-08	3.16e-07	1	0.71	1.63125	0.012509	0.110271	0	-0.55	0.685072	0.039107	0.0916672	0	5.09554	6.616	7.86765	7.32198	ARHGEF12	Rho guanine nucleotide exchange factor (GEF) 12	23365	601626, 604763	11
7944978	-1.17	0.444333	0.0148546	0.026746	-1	-2.31	0.201525	5.14e-05	0.000105903	-1	-1.14	0.453545	0.0154002	0.034313	-1	1.08	2.1161	0.00923636	0.0130933	1	-0.09	0.940253	0.82038	0.91393	0	-1.23	0.426447	0.0028967	0.0152891	-1	4.98973	6.16002	7.3007	6.07114	EI24	etoposide induced 2.4 mRNA	9538	605170	11
7946703	-1.02	0.493726	0.00355537	0.0083627	-1	-2.45	0.183272	2.33e-07	1.32e-06	-1	-1.43	0.371203	0.000135911	0.00118096	-1	1.77	3.40895	1.24e-06	6.83e-06	1	0.75	1.68309	0.0116466	0.106357	0	-0.68	0.624766	0.0174944	0.0520073	0	4.37684	5.39506	6.82478	6.14617	COPB1	coatomer protein complex, subunit beta 1	1315	600959	11, 11, 11
7947015	-1.17	0.444413	1.1e-06	3.01e-05	-1	-2.45	0.182525	1.23e-11	2.8e-09	-1	-1.28	0.41071	3.03e-07	2.27e-05	-1	1.25	2.38321	4.07e-08	6.07e-07	1	0.08	1.05913	0.597877	0.783433	0	-1.2	0.434994	7.41e-08	9.1e-06	-1	4.39915	5.56918	6.85299	5.65205	TSG101	tumor susceptibility gene 101	7251	601387	11
7950544	-1.2	0.433969	0.000370008	0.00146542	-1	-2.27	0.207252	2.15e-07	1.24e-06	-1	-1.07	0.477574	0.00116191	0.0051925	-1	1.68	3.20249	9.73e-07	5.73e-06	1	0.47	1.38978	0.073192	0.267311	0	-0.59	0.663724	0.0242561	0.0656622	0	3.39223	4.59657	5.66277	5.07142	PRKRIR	protein-kinase, interferon-inducible double stranded RNA dependent inhibitor, repressor of (P58 repressor)	5612	607374	11
7950838	-1.33	0.399086	0.00102949	0.00318342	-1	-2.55	0.171039	4.61e-07	2.21e-06	-1	-1.22	0.428577	0.00170444	0.00677253	-1	1.97	3.92119	1.16e-06	6.51e-06	1	0.65	1.56489	0.0460547	0.211345	0	-0.58	0.670678	0.0582429	0.122717	0	5.57696	6.90219	8.12456	7.54825	PICALM	phosphatidylinositol binding clathrin assembly protein	8301	601626, 603025	11
7952103	-2.16	0.223324	1.18e-05	0.000131053	-1	-3.63	0.0809605	5.03e-09	9.46e-08	-1	-1.46	0.362525	0.00073397	0.00373742	-1	2.83	7.09571	1.36e-08	2.79e-07	1	0.66	1.58464	0.0598013	0.241481	0	-0.8	0.574472	0.0182207	0.0535549	0	4.45061	6.6134	8.07725	7.27756	DDX6	DEAD (Asp-Glu-Ala-Asp) box polypeptide 6	1656	600326	11
7952305	-1.01	0.495988	0.0027169	0.00673586	-1	-2.31	0.201063	1.34e-07	8.77e-07	-1	-1.3	0.405379	0.000180109	0.00141589	-1	1.58	2.99391	1.95e-06	9.58e-06	1	0.57	1.48494	0.0383523	0.192527	0	-0.73	0.601965	0.00616643	0.0252461	0	3.37947	4.39109	5.69375	4.9615	BMPR1A	bone morphogenetic protein receptor, type IA	NA	NA
7953603	-1.01	0.496823	0.00049187	0.00181277	-1	-2.96	0.128843	6.52e-11	6.66e-09	-1	-1.95	0.259333	4.64e-08	6.51e-06	-1	1.64	3.1174	7.93e-08	9.54e-07	1	0.63	1.5488	0.00766987	0.0872418	0	-1.32	0.401655	1.45e-06	8.78e-05	-1	4.21792	5.22712	7.17424	5.85827	C1S	complement component 1, s subcomponent	716	120580	12, 12
7954503	-1.5	0.353888	0.000341976	0.00139019	-1	-2.55	0.170413	6.46e-07	2.89e-06	-1	-1.05	0.481545	0.00620796	0.0174311	-1	2.2	4.58573	3.77e-07	2.86e-06	1	0.7	1.62283	0.0351911	0.184603	0	-0.36	0.781467	0.242676	0.350978	0	4.35558	5.85422	6.90848	6.55273	MED21	mediator complex subunit 21	9412	603800	12
7954711	-1.08	0.471733	0.000952332	0.0029905	-1	-2.41	0.188762	5.94e-08	4.86e-07	-1	-1.32	0.400147	0.000109713	0.0010223	-1	2	3.9891	6.42e-08	8.34e-07	1	0.91	1.88179	0.00146597	0.0405643	0	-0.41	0.752992	0.103141	0.186785	0	4.95169	6.03565	7.35705	6.94775	C12orf35	chromosome 12 open reading frame 35	55196	NA	12
7954997	-1.37	0.387173	0.00017823	0.000859842	-1	-2.65	0.159336	2.56e-08	2.74e-07	-1	-1.28	0.411538	0.000287354	0.00193641	-1	1.88	3.6749	3.24e-07	2.56e-06	1	0.51	1.42282	0.0690326	0.259757	0	-0.77	0.585545	0.00562537	0.0237417	0	4.44116	5.8101	7.09101	6.31886	ANO6	anoctamin 6	196527	608663	12, 12, 12, 12
7955277	-2.25	0.210422	1.66e-05	0.000164691	-1	-3.26	0.104264	1.12e-07	7.66e-07	-1	-1.01	0.495502	0.0192377	0.0407534	-1	2.2	4.6085	2.47e-06	1.15e-05	1	-0.04	0.969727	0.90268	0.957783	0	-1.06	0.480502	0.00490823	0.0217566	-1	5.89188	8.14053	9.15357	8.09618	TMBIM6	transmembrane BAX inhibitor motif containing 6	7009	600748	12, 12
7955817	-1.14	0.452539	2.31e-06	4.6e-05	-1	-2.26	0.208239	1.76e-11	3.22e-09	-1	-1.12	0.460158	1.75e-06	7.36e-05	-1	1.53	2.87891	1.4e-09	6.15e-08	1	0.38	1.30282	0.0243989	0.152839	0	-0.74	0.599502	4.42e-05	0.000909164	0	6.59303	7.73692	8.85672	8.11855	PCBP2	poly(rC) binding protein 2	5094	601210	12
7956670	-1.2	0.433969	4.68e-05	0.000332783	-1	-2.62	0.162786	8.39e-10	3.15e-08	-1	-1.41	0.375109	5.67e-06	0.000155332	-1	1.91	3.76796	2.9e-09	9.96e-08	1	0.71	1.63517	0.00245407	0.0508058	0	-0.71	0.613369	0.00212136	0.0123278	0	4.34721	5.55155	6.96617	6.261	USP15	ubiquitin specific peptidase 15	9958	604731	12
7956876	-1.4	0.379434	0.000825874	0.00268735	-1	-2.56	0.16914	6.34e-07	2.85e-06	-1	-1.17	0.44577	0.00318096	0.0105913	-1	1.64	3.11711	2.86e-05	8.1e-05	1	0.24	1.18274	0.452699	0.681511	0	-0.92	0.52723	0.00521007	0.0226627	0	5.36395	6.76203	7.92765	7.00416	LLPH	LLP homolog, long-term synaptic facilitation (Aplysia)	84298	NA	12
7956937	-1.92	0.264519	7.76e-06	0.000100393	-1	-3.17	0.111004	8.24e-09	1.28e-07	-1	-1.25	0.419645	0.000968489	0.0045514	-1	2.37	5.15195	4.33e-08	6.29e-07	1	0.45	1.36279	0.140109	0.369221	0	-0.81	0.571887	0.00903834	0.0328658	0	3.04486	4.96341	6.21617	5.40997	RAP1B	RAP1B, member of RAS oncogene family	5908	179530	12
7957186	-1.2	0.436376	0.000290117	0.00122727	-1	-2.42	0.187039	5.7e-08	4.73e-07	-1	-1.22	0.428618	0.000240106	0.00171514	-1	1.82	3.54296	1.66e-07	1.58e-06	1	0.63	1.54606	0.017584	0.129638	0	-0.59	0.66267	0.0212794	0.0597462	0	4.92093	6.11729	7.33952	6.74589	TBC1D15	TBC1 domain family, member 15	64786	NA	12
7957478	-1.14	0.453482	0.00189126	0.00506464	-1	-2.99	0.125716	2.31e-08	2.58e-07	-1	-1.85	0.277223	1.04e-05	0.000230989	-1	1.82	3.52772	1.76e-06	8.89e-06	1	0.68	1.59976	0.0262391	0.158328	0	-1.17	0.44349	0.000378898	0.00390438	-1	3.59861	4.73949	6.59037	5.41735	TMTC3	transmembrane and tetratricopeptide repeat containing 3	160418	NA	12
7960221	-1.47	0.361871	0.00014369	0.000737063	-1	-2.59	0.16574	1.09e-07	7.54e-07	-1	-1.13	0.458009	0.00170783	0.00678355	-1	2.12	4.34863	1.27e-07	1.32e-06	1	0.65	1.57364	0.0294439	0.167195	0	-0.47	0.720743	0.0924219	0.171872	0	4.10371	5.57016	6.69671	6.22427	JARID1A	jumonji, AT rich interactive domain 1A	5927	180202	12
7962013	-1.24	0.423099	2.48e-05	0.000215806	-1	-2.69	0.155114	3.64e-10	1.99e-08	-1	-1.45	0.366613	3.1e-06	0.000106867	-1	1.98	3.94989	1.79e-09	7.37e-08	1	0.74	1.6712	0.00154676	0.0409693	0	-0.71	0.612682	0.00186029	0.0114241	0	3.78442	5.02535	6.47302	5.76624	ERGIC2	ERGIC and golgi 2	51290	612236	12
7962516	-1.52	0.34908	3.42e-06	6.08e-05	-1	-2.81	0.142475	1.71e-10	1.21e-08	-1	-1.29	0.408143	2.09e-05	0.000352996	-1	1.88	3.6771	8.48e-09	2.04e-07	1	0.36	1.2836	0.108587	0.321856	0	-0.93	0.523894	0.000134364	0.00195529	0	5.08149	6.59986	7.89271	6.96006	SLC38A1	solute carrier family 38, member 1	81539	608490	12
7962537	-1.89	0.270742	0.00103387	0.00319333	-1	-4.17	0.0556007	7.6e-08	5.84e-07	-1	-2.28	0.205364	0.00013245	0.00116273	-1	3.18	9.08704	2.71e-07	2.25e-06	1	1.3	2.46025	0.00730701	0.0848809	0	-0.98	0.505246	0.029247	0.0750995	0	5.75691	7.64192	9.92566	8.94072	SLC38A2	solute carrier family 38, member 2	54407	605180	12
7965436	-1.12	0.460982	4.1e-05	0.00030308	-1	-2.17	0.222629	5.88e-09	1.03e-07	-1	-1.05	0.482945	8.86e-05	0.000888035	-1	1.63	3.10243	4.89e-08	6.89e-07	1	0.52	1.43017	0.015491	0.121997	0	-0.53	0.690692	0.010426	0.0360554	0	4.51663	5.63384	6.68391	6.15003	EEA1	early endosome antigen 1	8411	605070	12
7966135	-1.25	0.419801	0.0026984	0.00670307	-1	-2.31	0.202201	6.36e-06	1.78e-05	-1	-1.05	0.481658	0.00877775	0.0224601	-1	1.59	3.01932	6.21e-05	0.000154931	1	0.34	1.26751	0.305301	0.552433	0	-0.71	0.610509	0.0326992	0.080679	0	4.74445	5.99667	7.05059	6.33868	CORO1C	coronin, actin binding protein, 1C	23603	605269	12
7967420	-1.71	0.304898	2.81e-09	9.95e-07	-1	-2.73	0.150534	1.15e-12	7.87e-10	-1	-1.02	0.493719	9.41e-06	0.000216456	-1	2.35	5.09238	6.64e-13	8.74e-10	1	0.63	1.55266	0.000617894	0.0274819	0	-0.38	0.766576	0.0197415	0.0566649	0	3.95131	5.66491	6.68315	6.29965	SBNO1	strawberry notch homolog 1 (Drosophila)	55206	NA	12
7968835	-1.11	0.462876	6.72e-07	2.25e-05	-1	-2.15	0.225618	2.18e-11	3.72e-09	-1	-1.04	0.487427	1.84e-06	7.64e-05	-1	1.66	3.16604	8.75e-11	1.15e-08	1	0.55	1.46549	0.000891908	0.0324982	0	-0.49	0.714317	0.00205597	0.0120697	0	3.76865	4.87995	5.91669	5.43133	AKAP11	A kinase (PRKA) anchor protein 11	11215	604696	13
7969003	-1.57	0.336886	0.00048737	0.0018053	-1	-2.88	0.136305	4.33e-07	2.11e-06	-1	-1.31	0.404602	0.00237823	0.00853272	-1	1.75	3.35925	3.64e-05	9.88e-05	1	0.18	1.13168	0.604194	0.787521	0	-1.13	0.457882	0.00219849	0.012635	-1	6.02774	7.59741	8.90283	7.77588	ITM2B	integral membrane protein 2B	9445	117300, 176500, 603904	13
7969493	-1.03	0.488268	0.00157153	0.00440585	-1	-3.24	0.105601	4.01e-10	2.11e-08	-1	-2.21	0.216277	9.72e-08	1e-05	-1	1.22	2.33504	9.3e-05	0.000219963	1	0.19	1.14013	0.465345	0.691802	0	-2.02	0.246583	3.43e-08	5e-06	-1	4.55448	5.58874	7.79778	5.77793	SCEL	sciellin	8796	604112	13
7969794	-1.27	0.414051	0.00886089	0.0175022	-1	-2.79	0.14419	6.15e-06	1.73e-05	-1	-1.52	0.348242	0.00226559	0.00822763	-1	1.39	2.62397	0.00137597	0.00231148	1	0.12	1.08646	0.760365	0.882892	0	-1.4	0.37835	0.00113426	0.00814094	-1	3.56705	4.83917	6.36101	4.9588	UNQ1829	FRSS1829	100132099	NA
7969796	-1.91	0.265736	2.72e-06	5.11e-05	-1	-3.46	0.0911602	1.91e-10	1.32e-08	-1	-1.54	0.343048	3.31e-05	0.000472998	-1	2.35	5.08402	7.18e-09	1.86e-07	1	0.43	1.35101	0.117936	0.336771	0	-1.11	0.463461	0.000206236	0.00263034	-1	4.41606	6.32799	7.87151	6.76203	TM9SF2	transmembrane 9 superfamily member 2	9375	604678	13
7971077	-1.7	0.307142	0.000587381	0.00206785	-1	-4.02	0.0614817	4.27e-09	8.49e-08	-1	-2.32	0.200174	1.12e-05	0.000238869	-1	2.88	7.33679	5.98e-08	7.9e-07	1	1.17	2.25344	0.00444077	0.0663143	0	-1.15	0.451079	0.00306935	0.0158784	-1	4.45404	6.15706	8.47774	7.32919	POSTN	periostin, osteoblast specific factor	10631	608777	13
7971513	-1.33	0.398515	0.00125737	0.00371266	-1	-2.8	0.144013	2.18e-07	1.25e-06	-1	-1.47	0.361375	0.00042687	0.00256945	-1	1.74	3.32975	1.39e-05	4.49e-05	1	0.41	1.32695	0.209238	0.451744	0	-1.06	0.479529	0.00196743	0.0117391	-1	4.61105	5.93834	7.40677	6.34646	ESD	esterase D/formylglutathione hydrolase	2098	133280	13
7971541	-1.19	0.438033	0.000744208	0.00247262	-1	-2.32	0.200256	3.59e-07	1.82e-06	-1	-1.13	0.457171	0.00114927	0.00515074	-1	1.73	3.3073	1.61e-06	8.34e-06	1	0.53	1.44871	0.0584942	0.238789	0	-0.59	0.662308	0.0312787	0.0784551	0	5.14211	6.33299	7.46219	6.86776	SUCLA2	succinate-CoA ligase, ADP-forming, beta subunit	8803	251880, 603921, 609560, 612073	13
7971550	-1.28	0.411444	0.000405708	0.00156873	-1	-2.45	0.182769	1.54e-07	9.72e-07	-1	-1.17	0.444214	0.000873426	0.00423639	-1	1.69	3.22107	2.52e-06	1.17e-05	1	0.41	1.32529	0.147719	0.377889	0	-0.76	0.588712	0.00743893	0.0287244	0	4.69532	5.97655	7.14723	6.38286	MED4	mediator complex subunit 4	29079	605718	13
7971996	-1.05	0.482052	0.00532113	0.0115591	-1	-2.71	0.153314	1.52e-07	9.65e-07	-1	-1.65	0.318045	6.35e-05	0.000727429	-1	2.15	4.43601	2.98e-07	2.41e-06	1	1.1	2.13839	0.00136258	0.039243	1	-0.56	0.680103	0.0648864	0.132426	0	4.82791	5.88065	7.53334	6.97717	---	---	NA	NA
7972069	-1.19	0.438836	0.000547619	0.00196392	-1	-2.8	0.144041	1.04e-08	1.5e-07	-1	-1.61	0.328234	1.66e-05	0.000307014	-1	1.93	3.81049	1.71e-07	1.61e-06	1	0.74	1.67218	0.00902601	0.0942342	0	-0.87	0.548867	0.00229373	0.013018	0	5.08213	6.27038	7.87758	7.01211	MYCBP2	MYC binding protein 2	23077	610392	13
7972888	-1.17	0.443165	0.00712607	0.014613	-1	-2.34	0.197412	1.22e-05	3.11e-05	-1	-1.17	0.445459	0.00682213	0.0187118	-1	1.86	3.62505	2.32e-05	6.84e-05	1	0.68	1.6065	0.0627804	0.246322	0	-0.48	0.715629	0.162034	0.260134	0	4.2992	5.47328	6.63992	6.1572	PCID2	PCI domain containing 2	55795	NA	13
7973936	-1.85	0.276476	5.74e-05	0.00038197	-1	-3.06	0.119509	7.31e-08	5.7e-07	-1	-1.21	0.432259	0.00322441	0.0107119	-1	1.55	2.92207	8.82e-05	0.000209955	1	-0.31	0.807881	0.357876	0.60138	0	-1.52	0.349214	6.77e-05	0.00123528	-1	5.77718	7.63196	8.84199	7.32417	PSMA6	proteasome (prosome, macropain) subunit, alpha type, 6	5687	602855	14
7974229	-1.95	0.25945	7.03e-07	2.31e-05	-1	-3.57	0.0840176	5.75e-11	6.22e-09	-1	-1.63	0.323829	8.78e-06	0.000206744	-1	2.89	7.407	6.97e-11	1.08e-08	1	0.94	1.92175	0.00106475	0.0358896	0	-0.68	0.622318	0.00978698	0.0346963	0	3.71172	5.65819	7.28489	6.60061	KLHDC2	kelch domain containing 2	23588	611280	14
7974303	-1.29	0.409005	0.000897864	0.00286306	-1	-2.75	0.148688	9.86e-08	6.93e-07	-1	-1.46	0.363537	0.000228899	0.00166536	-1	1.84	3.58358	2.08e-06	1.01e-05	1	0.55	1.4657	0.0742453	0.269269	0	-0.91	0.532836	0.00393547	0.0186784	0	4.10872	5.39854	6.85836	5.95013	TMX1	thioredoxin-related transmembrane protein 1	81542	610527	14
7974587	-1.32	0.401016	3.07e-05	0.000247623	-1	-2.35	0.196753	1.04e-08	1.5e-07	-1	-1.03	0.490636	0.000437098	0.00261517	-1	1.66	3.16563	1.18e-07	1.27e-06	1	0.34	1.26947	0.133548	0.360003	0	-0.68	0.622846	0.00375912	0.018062	0	3.42775	4.74602	5.7733	5.09024	ACTR10	actin-related protein 10 homolog (S. cerevisiae)	55860	NA	14
7974603	-1.57	0.336161	0.00136229	0.00394156	-1	-3.15	0.112917	4.88e-07	2.3e-06	-1	-1.57	0.335903	0.001159	0.00518495	-1	2.18	4.54528	7.21e-06	2.67e-05	1	0.61	1.52794	0.119491	0.33847	0	-0.96	0.513241	0.013628	0.0435962	0	5.20321	6.77598	8.34987	7.38757	PSMA3	proteasome (prosome, macropain) subunit, alpha type, 3	5684	176843	14
7974835	-1.2	0.435215	0.00128441	0.0037772	-1	-2.23	0.212815	1.57e-06	5.74e-06	-1	-1.03	0.488988	0.00405599	0.0127622	-1	1.56	2.95439	1.58e-05	4.98e-05	1	0.36	1.28579	0.218485	0.46327	0	-0.67	0.628738	0.0231677	0.0634703	0	4.55261	5.75281	6.78494	6.11547	PRKCH	protein kinase C, eta	5583	601367, 605437	14
7975224	-1.32	0.400302	0.00131932	0.00385911	-1	-2.85	0.139002	2.11e-07	1.22e-06	-1	-1.53	0.347242	0.000316682	0.00207907	-1	1.6	3.03349	3.24e-05	8.98e-05	1	0.28	1.21431	0.382003	0.622677	0	-1.25	0.42166	0.000483941	0.0046136	-1	5.29053	6.61137	8.13736	6.89151	EIF2S1	eukaryotic translation initiation factor 2, subunit 1 alpha, 35kDa	1965	603907	14
7975453	-1.07	0.477883	0.00937049	0.0182778	-1	-2.07	0.238338	2.42e-05	5.56e-05	-1	-1	0.498736	0.0119779	0.0283503	-1	1.28	2.42551	0.000694773	0.00125592	1	0.21	1.15911	0.523074	0.732739	0	-0.79	0.578091	0.018451	0.0539882	0	2.15149	3.21676	4.22041	3.42978	SNORD56B	small nucleolar RNA, C/D box 56B	319139	NA	14
7975545	-1.09	0.47107	4.78e-05	0.000337021	-1	-2.28	0.206	8.22e-10	3.11e-08	-1	-1.19	0.437301	1.08e-05	0.000234928	-1	1.51	2.84174	3.68e-08	5.67e-07	1	0.42	1.33866	0.0356175	0.18607	0	-0.77	0.585397	0.000260498	0.0031172	0	4.18391	5.26989	6.46319	5.69068	PSEN1	presenilin 1	5663	104311, 172700, 600274, 607822	14
7976621	-1.51	0.350872	6.65e-05	0.000419928	-1	-2.54	0.171765	1.48e-07	9.5e-07	-1	-1.03	0.489539	0.00311397	0.0104126	-1	1.77	3.40426	1.36e-06	7.34e-06	1	0.26	1.19446	0.355209	0.598673	0	-0.77	0.584733	0.00817831	0.0307238	0	3.87192	5.38291	6.41341	5.63926	VRK1	vaccinia related kinase 1	7443	602168	14
7978449	-1.39	0.381465	4.63e-08	5.56e-06	-1	-2.67	0.15667	2.45e-12	1.22e-09	-1	-1.28	0.410705	2.69e-07	2.11e-05	-1	1.92	3.77231	1.83e-11	4.16e-09	1	0.53	1.439	0.0022951	0.0492884	0	-0.76	0.591007	5.82e-05	0.00111726	0	4.791	6.18138	7.4652	6.70645	HECTD1	HECT domain containing 1	25831	NA	14
7979367	-1.58	0.335107	0.000405975	0.00156881	-1	-3.44	0.0922087	2.58e-08	2.75e-07	-1	-1.86	0.275162	6.59e-05	0.000742145	-1	2.63	6.21166	7.4e-08	9.21e-07	1	1.06	2.08157	0.00451729	0.0665759	0	-0.8	0.572769	0.0218034	0.0607992	0	3.22568	4.80299	6.66464	5.86066	EXOC5	exocyst complex component 5	10640	604469	14
7979473	-1.17	0.444192	0.000535589	0.00193155	-1	-2.7	0.153572	6.48e-09	1.1e-07	-1	-1.53	0.345735	1.81e-05	0.000323287	-1	1.54	2.90342	2.91e-06	1.31e-05	1	0.37	1.28968	0.160434	0.394534	0	-1.17	0.445885	6.54e-05	0.00120506	-1	3.86852	5.03927	6.57153	5.40628	DHRS7	dehydrogenase/reductase (SDR family) member 7	51635	NA	14
7979862	-1.15	0.449814	0.00299657	0.00728679	-1	-2.38	0.192605	1.67e-06	6.03e-06	-1	-1.22	0.428188	0.00171668	0.00681126	-1	1.83	3.55432	4.91e-06	1.98e-05	1	0.68	1.59878	0.0371537	0.189496	0	-0.55	0.684579	0.0760197	0.14868	0	5.53337	6.68597	7.90965	7.36294	---	---	NA	NA
7979906	-1.72	0.302618	3e-05	0.000243396	-1	-3.45	0.0912538	1.02e-09	3.56e-08	-1	-1.73	0.301548	2.22e-05	0.000368918	-1	2.02	4.05397	4.42e-07	3.21e-06	1	0.29	1.2268	0.319496	0.565665	0	-1.43	0.369941	2.96e-05	0.000689083	-1	4.96899	6.69342	8.42296	6.98832	COX16	COX16 cytochrome c oxidase assembly homolog (S. cerevisiae)	51241	NA	14
7979931	-1.01	0.495835	0.00078431	0.00257928	-1	-2.25	0.210124	6.31e-08	5.07e-07	-1	-1.24	0.423778	9.85e-05	0.000952235	-1	1.31	2.47675	1.06e-05	3.6e-05	1	0.3	1.22806	0.211203	0.454149	0	-0.94	0.520425	0.000375933	0.00388405	0	3.94876	4.96083	6.19945	5.25721	MED6	mediator complex subunit 6	10001	602984	14
7980463	-1.16	0.447853	1.17e-05	0.000131041	-1	-2.31	0.202138	4.14e-10	2.13e-08	-1	-1.15	0.45135	1.15e-05	0.00024136	-1	1.93	3.81832	3.28e-10	2.56e-08	1	0.77	1.71005	0.00031385	0.0197199	0	-0.37	0.77183	0.0429997	0.0982188	0	4.86749	6.0264	7.17408	6.80043	SNW1	SNW domain containing 1	22938	603055	14
7980680	-1.46	0.364391	4.24e-06	6.91e-05	-1	-2.48	0.179219	1.51e-09	4.55e-08	-1	-1.02	0.491831	0.000268171	0.00184628	-1	1.9	3.73475	6.2e-09	1.69e-07	1	0.44	1.36091	0.0468668	0.21318	0	-0.58	0.669336	0.00859068	0.0318106	0	3.96908	5.42552	6.44928	5.87009	FOXN3	forkhead box N3	1112	602628	14, 14
7980940	-1.64	0.320051	4.16e-05	0.000305902	-1	-2.8	0.143474	5.57e-08	4.65e-07	-1	-1.16	0.448286	0.00167119	0.00668211	-1	2.47	5.54516	1.24e-08	2.61e-07	1	0.83	1.77473	0.00801704	0.0889901	0	-0.33	0.795588	0.246516	0.355216	0	5.27588	6.91951	8.07702	7.74711	ATXN3	ataxin 3	4287	109150, 607047	14
7981192	-1.09	0.468901	0.000203451	0.000946754	-1	-2.46	0.181315	8.04e-09	1.26e-07	-1	-1.37	0.386681	1.72e-05	0.000313243	-1	1.93	3.81588	7.69e-09	1.93e-07	1	0.84	1.78927	0.000801388	0.0312268	0	-0.53	0.691876	0.0223027	0.0618915	0	4.03171	5.12436	6.49514	5.96373	ATG2B	ATG2 autophagy related 2 homolog B (S. cerevisiae)	55102	NA	14
7982935	-1.19	0.43818	0.00715067	0.0146539	-1	-2.35	0.196811	1.59e-05	3.89e-05	-1	-1.15	0.449155	0.00829712	0.0215737	-1	1.58	2.98272	0.000206304	0.000435938	1	0.39	1.30697	0.288091	0.535111	0	-0.77	0.587032	0.0344201	0.0836474	0	5.32059	6.51099	7.6657	6.89721	---	---	NA	NA
7984132	-1.15	0.451147	4.15e-05	0.000305612	-1	-2.21	0.21675	3.1e-09	6.9e-08	-1	-1.06	0.480443	8.37e-05	0.000862707	-1	1.55	2.93388	4.43e-08	6.4e-07	1	0.4	1.32361	0.051376	0.222355	0	-0.65	0.635918	0.0019059	0.0115549	0	4.96983	6.11816	7.17572	6.52264	USP3	ubiquitin specific peptidase 3	9960	604728	15
7984289	-1.13	0.455995	0.0121716	0.0226503	-1	-2.82	0.141677	1.24e-06	4.73e-06	-1	-1.69	0.310699	0.000396974	0.0024443	-1	1.65	3.1318	0.000125514	0.000284291	1	0.51	1.42808	0.169844	0.405578	0	-1.17	0.443705	0.00235841	0.0132483	-1	4.8333	5.96621	7.65262	6.48029	RAB11A	RAB11A, member RAS oncogene family	8766	605570	15
7984453	-1.08	0.471898	4.8e-05	0.000337463	-1	-2.39	0.190168	4.59e-10	2.23e-08	-1	-1.31	0.402984	3.3e-06	0.000109661	-1	1.73	3.31833	4.55e-09	1.36e-07	1	0.65	1.56592	0.00240567	0.0504393	0	-0.66	0.631039	0.00135189	0.00922212	0	5.616	6.69945	8.01066	7.34646	PIAS1	protein inhibitor of activated STAT, 1	8554	603566	15
7985166	-1.12	0.460609	0.000143913	0.000737859	-1	-2.4	0.189405	6.95e-09	1.16e-07	-1	-1.28	0.411206	2.99e-05	0.00043987	-1	1.74	3.34972	3.99e-08	5.99e-07	1	0.63	1.54291	0.00801278	0.0889901	0	-0.66	0.634454	0.00492514	0.0218051	0	3.62708	4.74546	6.02753	5.37112	IREB2	iron-responsive element binding protein 2	3658	147582	15
7985488	-1.01	0.495991	0.000698098	0.00235086	-1	-2.52	0.174426	2.07e-09	5.42e-08	-1	-1.51	0.351673	4e-06	0.000124263	-1	1.33	2.50562	3.1e-06	1.37e-05	1	0.31	1.24276	0.172841	0.409034	0	-1.19	0.437046	8.29e-06	0.000275354	-1	5.09034	6.10196	7.60965	6.41551	FAM103A1	family with sequence similarity 103, member A1	83640	NA	15
7986010	-1.57	0.337099	1.96e-09	8.26e-07	-1	-2.69	0.154972	2.03e-13	4.55e-10	-1	-1.12	0.459723	5.1e-07	3.2e-05	-1	1.97	3.91226	2.98e-12	1.92e-09	1	0.4	1.31882	0.0107031	0.102171	0	-0.72	0.606292	2.93e-05	0.000685624	0	5.7098	7.27855	8.39972	7.6778	IQGAP1	IQ motif containing GTPase activating protein 1	8826	603379	15
7986383	-1.27	0.415333	0.0199594	0.0343044	-1	-2.47	0.18009	0.000115811	0.00021625	-1	-1.21	0.433605	0.0238852	0.0484037	-1	2.11	4.33019	8.18e-05	0.000196761	1	0.85	1.79847	0.0693321	0.260326	0	-0.36	0.779825	0.404597	0.513544	0	4.33762	5.60528	6.81083	6.45205	IGF1R	insulin-like growth factor 1 receptor	3480	147370	15
7987172	-1.6	0.329291	0.00211117	0.00551426	-1	-2.91	0.1331	5.91e-06	1.67e-05	-1	-1.31	0.404202	0.00922382	0.0232639	-1	1.62	3.0693	0.000698889	0.00126232	1	0.02	1.01069	0.970343	0.987324	0	-1.29	0.408523	0.00337253	0.016728	-1	5.67666	7.27922	8.58608	7.29457	C15orf24	chromosome 15 open reading frame 24	56851	NA	15
7987369	-1.37	0.387791	0.00071413	0.00239232	-1	-2.37	0.193257	1.82e-06	6.44e-06	-1	-1	0.498354	0.00801746	0.0210165	-1	2.07	4.19838	8.32e-07	5.09e-06	1	0.7	1.62809	0.0317532	0.174507	0	-0.3	0.811367	0.317096	0.429142	0	3.34347	4.71011	5.71487	5.4133	ATPBD4	ATP binding domain 4	89978	NA	15, 15
7988605	-1.09	0.470952	0.00124731	0.00369094	-1	-2.21	0.216729	4.41e-07	2.13e-06	-1	-1.12	0.460193	0.000886139	0.00427655	-1	1.59	3.01585	2.45e-06	1.14e-05	1	0.51	1.42032	0.0616845	0.24439	0	-0.61	0.653621	0.0216204	0.0604968	0	4.47993	5.56628	6.68597	6.0725	COPS2	COP9 constitutive photomorphogenic homolog subunit 2 (Arabidopsis)	9318	604508	15
7988713	-1.18	0.440538	8.19e-05	0.000487475	-1	-2.24	0.211837	2.14e-08	2.47e-07	-1	-1.06	0.48086	0.000281545	0.00191391	-1	1.94	3.8481	5.81e-09	1.61e-07	1	0.76	1.69523	0.00185128	0.0436251	0	-0.29	0.815171	0.172732	0.272182	0	4.13864	5.3213	6.37761	6.08278	TRPM7	transient receptor potential cation channel, subfamily M, member 7	54822	105500, 605692	15
7988753	-1.49	0.355284	0.000633098	0.00219277	-1	-2.76	0.147412	3.36e-07	1.73e-06	-1	-1.27	0.414913	0.00213132	0.00790857	-1	1.83	3.55887	8.27e-06	2.98e-05	1	0.34	1.26441	0.311324	0.55697	0	-0.93	0.524619	0.00607264	0.0250077	0	4.19677	5.68972	6.95885	6.02819	SPPL2A	signal peptide peptidase-like 2A	84888	608238	15
7989128	-1.32	0.400365	0.00279763	0.00688604	-1	-2.39	0.190231	9.33e-06	2.46e-05	-1	-1.07	0.475143	0.011605	0.0276312	-1	2	3.99015	7.39e-06	2.73e-05	1	0.68	1.59752	0.0631621	0.246492	0	-0.4	0.75905	0.245109	0.353515	0	4.17673	5.49734	6.5709	6.17317	CNOT6L	CCR4-NOT transcription complex, subunit 6-like	NA	NA
7989735	-1.46	0.364396	0.000105983	0.000590049	-1	-2.72	0.151753	2.27e-08	2.55e-07	-1	-1.26	0.416451	0.000396324	0.00244238	-1	1.89	3.70398	3.41e-07	2.66e-06	1	0.43	1.34972	0.123056	0.344638	0	-0.83	0.562091	0.00368516	0.0177898	0	4.0896	5.54602	6.8098	5.97867	CLPX	ClpX caseinolytic peptidase X homolog (E. coli)	10845	NA	15
7989806	-1.06	0.480242	1.76e-05	0.000172326	-1	-2.25	0.210376	2.09e-10	1.4e-08	-1	-1.19	0.438062	2.95e-06	0.000103408	-1	1.58	2.99363	4.5e-09	1.35e-07	1	0.52	1.43767	0.00571179	0.0755011	0	-0.67	0.629788	0.00050024	0.00473296	0	3.30604	4.36421	5.555	4.88794	DPP8	dipeptidyl-peptidase 8	54878	606819	15, 15
7993999	-1.72	0.303497	0.000903026	0.00287281	-1	-2.89	0.134675	2.35e-06	7.91e-06	-1	-1.17	0.443746	0.0133215	0.0307534	-1	2.54	5.80329	9.23e-07	5.51e-06	1	0.82	1.76128	0.04795	0.214988	0	-0.36	0.781561	0.340768	0.452725	0	5.33129	7.05153	8.22373	7.86816	LOC440354	PI-3-kinase-related kinase SMG-1 pseudogene	440354	NA	16, 16
7996947	-1.65	0.318488	7.1e-07	2.31e-05	-1	-2.81	0.142572	1.5e-10	1.13e-08	-1	-1.16	0.447653	6.76e-05	0.000752584	-1	1.93	3.80018	4.46e-09	1.34e-07	1	0.28	1.21031	0.206001	0.447882	0	-0.88	0.541799	0.000221286	0.00275499	0	5.07401	6.7247	7.88425	7.00007	CYB5B	cytochrome b5 type B (outer mitochondrial membrane)	80777	611964	16
7998823	-1.5	0.352864	1.57e-06	3.67e-05	-1	-2.81	0.14294	5.92e-11	6.22e-09	-1	-1.3	0.405086	8.4e-06	0.000201693	-1	1.84	3.57146	5.37e-09	1.53e-07	1	0.33	1.26024	0.114494	0.331945	0	-0.97	0.510505	4.42e-05	0.000909164	0	6.01825	7.52107	8.82477	7.85477	PDPK1	3-phosphoinositide dependent protein kinase-1	NA	NA
7998841	-1.5	0.352864	1.57e-06	3.67e-05	-1	-2.81	0.14294	5.92e-11	6.22e-09	-1	-1.3	0.405086	8.4e-06	0.000201693	-1	1.84	3.57146	5.37e-09	1.53e-07	1	0.33	1.26024	0.114494	0.331945	0	-0.97	0.510505	4.42e-05	0.000909164	0	6.01825	7.52107	8.82477	7.85477	PDPK1	3-phosphoinositide dependent protein kinase-1	NA	NA
7999326	-1.81	0.284925	2.07e-06	4.35e-05	-1	-3.21	0.107831	3.79e-10	2.04e-08	-1	-1.4	0.378453	5.66e-05	0.000676356	-1	2.41	5.29999	2.51e-09	9.25e-08	1	0.59	1.5101	0.0271622	0.160618	0	-0.81	0.571501	0.0029304	0.0154001	0	4.84596	6.65731	8.05912	7.25195	USP7	ubiquitin specific peptidase 7 (herpes virus-associated)	7874	602519	16
7999387	-1.12	0.460008	0.00236421	0.00603719	-1	-2.61	0.164262	8.35e-08	6.15e-07	-1	-1.49	0.357085	0.000109796	0.0010223	-1	1.5	2.83317	1.65e-05	5.15e-05	1	0.38	1.30328	0.191145	0.429388	0	-1.1	0.465382	0.000405424	0.00409962	-1	7.15951	8.27978	9.76544	8.66193	EMP2	epithelial membrane protein 2	2013	602334	16
7999752	-2.81	0.142838	7.86e-06	0.000100937	-1	-3.95	0.0648026	5.12e-08	4.39e-07	-1	-1.14	0.453678	0.0233793	0.047636	-1	3.2	9.16604	7.51e-08	9.27e-07	1	0.39	1.30926	0.36559	0.608001	0	-0.75	0.593983	0.0675759	0.136286	0	3.47391	6.28146	7.42172	6.67021	ZC3H11A	zinc finger CCCH-type containing 11A	9877	NA	1
7999834	-1.85	0.278068	3.95e-05	0.000295336	-1	-3.26	0.104558	9.23e-09	1.39e-07	-1	-1.41	0.376016	0.000538179	0.00302894	-1	2.28	4.86413	1.5e-07	1.47e-06	1	0.44	1.35256	0.17821	0.416687	0	-0.98	0.508583	0.00292423	0.0153751	0	5.84688	7.69337	9.10451	8.12906	ARL6IP1	ADP-ribosylation factor-like 6 interacting protein 1	23204	607669	16
8000222	-1.72	0.303497	0.000903026	0.00287281	-1	-2.89	0.134675	2.35e-06	7.91e-06	-1	-1.17	0.443746	0.0133215	0.0307534	-1	2.54	5.80329	9.23e-07	5.51e-06	1	0.82	1.76128	0.04795	0.214988	0	-0.36	0.781561	0.340768	0.452725	0	5.33129	7.05153	8.22373	7.86816	LOC595101	PI-3-kinase-related kinase SMG-1 pseudogene	595101	NA	16
8001149	-1.02	0.494687	0.000849262	0.00274912	-1	-2.09	0.23437	1.46e-07	9.39e-07	-1	-1.08	0.473775	0.000412403	0.00250877	-1	1.38	2.59616	4.55e-06	1.86e-05	1	0.36	1.28429	0.132413	0.358788	0	-0.72	0.608464	0.00367033	0.0177681	0	4.91615	5.93157	7.00929	6.29253	VPS35	vacuolar protein sorting 35 homolog (S. cerevisiae)	55737	606931	16
8001185	-1.94	0.261321	4.67e-06	7.34e-05	-1	-3.07	0.119043	7.13e-09	1.17e-07	-1	-1.13	0.455541	0.00172061	0.00681945	-1	2.32	4.99806	4.7e-08	6.71e-07	1	0.39	1.3061	0.190554	0.428746	0	-0.75	0.594982	0.0116562	0.0391082	0	4.11945	6.05555	7.1899	6.44082	DNAJA2	DnaJ (Hsp40) homolog, subfamily A, member 2	10294	611322	16
8001211	-1.25	0.419577	0.000528247	0.00191074	-1	-2.27	0.207372	4.01e-07	1.99e-06	-1	-1.02	0.494242	0.00278582	0.00958207	-1	1.74	3.3437	1.19e-06	6.62e-06	1	0.49	1.40294	0.0838243	0.284914	0	-0.53	0.69339	0.0500858	0.109783	0	4.28554	5.53853	6.55524	6.02698	ITFG1	integrin alpha FG-GAP repeat containing 1	81533	611803	16
8001496	-1.17	0.445565	0.0118085	0.0221215	-1	-2.81	0.142689	2.7e-06	8.8e-06	-1	-1.64	0.320244	0.000747806	0.00378614	-1	1.87	3.65103	5.24e-05	0.000134133	1	0.7	1.62677	0.0742076	0.269221	0	-0.94	0.520964	0.0155532	0.048162	0	4.40098	5.56727	7.21003	6.26929	NUDT21	nudix (nucleoside diphosphate linked moiety X)-type motif 21	11051	604978	16
8001666	-1	0.499425	0.00714224	0.0146394	-1	-3.04	0.121764	2.37e-08	2.62e-07	-1	-2.04	0.243808	4.09e-06	0.000124901	-1	1.29	2.43983	0.000252578	0.000520831	1	0.29	1.21851	0.347892	0.592839	0	-1.75	0.297084	3.7e-06	0.00015341	-1	5.76619	6.76785	8.80403	7.05297	CSNK2A2	casein kinase 2, alpha prime polypeptide	1459	115442	16
8001693	-1.4	0.378561	8e-06	0.000101976	-1	-2.76	0.147742	2.8e-10	1.69e-08	-1	-1.36	0.390273	1.03e-05	0.000230457	-1	1.87	3.66103	7.82e-09	1.96e-07	1	0.47	1.38593	0.0369531	0.189124	0	-0.89	0.540889	0.000244145	0.00295871	0	4.89403	6.29543	7.65287	6.76628	CNOT1	CCR4-NOT transcription complex, subunit 1	23019	604917	16, 16
8003758	-1.54	0.34422	2.53e-05	0.000217865	-1	-3.14	0.113286	5.73e-10	2.58e-08	-1	-1.6	0.32911	1.14e-05	0.000241132	-1	2.01	4.01873	4.3e-08	6.26e-07	1	0.47	1.38333	0.0776992	0.274509	0	-1.14	0.455268	0.000101751	0.00161186	-1	4.65383	6.19242	7.79578	6.66057	PAFAH1B1	platelet-activating factor acetylhydrolase, isoform Ib, alpha subunit 45kDa	5048	247200, 601545, 607432	17
8005501	-1.21	0.433448	1.26e-06	3.26e-05	-1	-2.64	0.160884	1.15e-11	2.8e-09	-1	-1.43	0.371172	1.35e-07	1.28e-05	-1	1.94	3.83823	2.55e-11	5.3e-09	1	0.73	1.66367	0.000148497	0.0137561	0	-0.7	0.617509	0.000297536	0.00342715	0	3.94729	5.15336	6.5832	5.88773	FAM18B	family with sequence similarity 18, member B	51030	NA	17
8005765	-1.75	0.296536	1.11e-06	3.02e-05	-1	-3.42	0.0937032	6.97e-11	6.92e-09	-1	-1.66	0.315993	3.19e-06	0.000107952	-1	3.01	8.03666	1.1e-11	3.2e-09	1	1.25	2.38316	2.21e-05	0.00549234	1	-0.41	0.753061	0.0925087	0.171975	0	3.79106	5.54478	7.20682	6.79765	WSB1	WD repeat and SOCS box-containing 1	26118	610091	17
8007228	-1.83	0.281994	7.49e-09	1.9e-06	-1	-2.99	0.126066	2.41e-12	1.22e-09	-1	-1.16	0.447053	8.38e-06	0.000201693	-1	1.8	3.4793	5.53e-10	3.37e-08	1	-0.03	0.981142	0.878061	0.944693	0	-1.19	0.438622	5.52e-07	4.34e-05	-1	4.13861	5.96487	7.12635	5.9374	ATP6V0A1	ATPase, H+ transporting, lysosomal V0 subunit a1	535	192130	17
8007919	-1.04	0.48615	0.00243054	0.00615862	-1	-2.21	0.215595	4.86e-07	2.29e-06	-1	-1.17	0.443475	0.000693739	0.00359056	-1	1.96	3.89981	1.57e-07	1.51e-06	1	0.92	1.89589	0.00215404	0.0474715	0	-0.25	0.840781	0.331228	0.443979	0	5.01533	6.05585	7.22893	6.97873	LRRC37A4	leucine rich repeat containing 37, member A4 (pseudogene)	55073	NA	17
8007976	-1.71	0.305727	4.59e-07	1.81e-05	-1	-2.89	0.1346	1.32e-10	1.02e-08	-1	-1.18	0.440263	6.37e-05	0.000727429	-1	2.26	4.79735	2.82e-10	2.3e-08	1	0.55	1.46668	0.0165211	0.125902	0	-0.63	0.645725	0.00540223	0.0232173	0	4.99055	6.70023	7.8838	7.25279	NPEPPS	aminopeptidase puromycin sensitive	9520	606793	17
8007990	-2.1	0.232925	0.000227851	0.00103159	-1	-3.7	0.0768138	2.44e-07	1.36e-06	-1	-1.6	0.329778	0.00266046	0.00925869	-1	2.59	6.01593	2.99e-06	1.34e-05	1	0.49	1.40126	0.25943	0.507661	0	-1.11	0.462106	0.0113089	0.0381652	-1	3.30634	5.4084	7.00883	5.89513	---	---	NA	NA
8008834	-1.49	0.355993	3.22e-05	0.00025634	-1	-3.12	0.115262	7.45e-10	3e-08	-1	-1.63	0.323776	9.08e-06	0.000210629	-1	1.94	3.8368	6.67e-08	8.57e-07	1	0.45	1.36587	0.0858799	0.288424	0	-1.18	0.442237	6.9e-05	0.00124659	-1	4.49583	5.98591	7.61284	6.43573	CLTC	clathrin, heavy chain (Hc)	1213	118955	17
8010949	-1.09	0.468529	0.000251122	0.0011033	-1	-2.11	0.230928	5.54e-08	4.64e-07	-1	-1.02	0.492878	0.000439906	0.00262766	-1	1.21	2.3214	1.13e-05	3.8e-05	1	0.12	1.08764	0.586529	0.777039	0	-0.9	0.536074	0.00029421	0.00339958	0	4.86348	5.95727	6.97797	6.07847	GLOD4	glyoxalase domain containing 4	51031	NA	17
8011626	-1.48	0.358389	0.00022791	0.00103159	-1	-2.79	0.144234	5.35e-08	4.54e-07	-1	-1.31	0.402451	0.000606412	0.00328967	-1	1.88	3.68687	1.29e-06	7.07e-06	1	0.4	1.32133	0.184778	0.42344	0	-0.91	0.531773	0.00332926	0.016625	0	4.35805	5.83845	7.15156	6.24044	UBE2G1	ubiquitin-conjugating enzyme E2G 1 (UBC7 homolog, yeast)	7326	601569	17
8011968	-1.11	0.46321	4.35e-06	7.05e-05	-1	-2.13	0.228733	3.05e-10	1.8e-08	-1	-1.02	0.4938	1.41e-05	0.000276059	-1	1.64	3.127	5.17e-10	3.26e-08	1	0.53	1.44846	0.00303755	0.0554921	0	-0.48	0.715248	0.00534016	0.0230391	0	3.94895	5.05921	6.07721	5.59372	MED31	mediator complex subunit 31	51003	NA	17
8012110	-2.15	0.225139	3.55e-06	6.15e-05	-1	-3.26	0.104349	7.73e-09	1.23e-07	-1	-1.11	0.463487	0.00376942	0.0120868	-1	1.98	3.93889	1.3e-06	7.1e-06	1	-0.17	0.886797	0.577965	0.77149	0	-1.28	0.411019	0.000207336	0.00263533	-1	4.66154	6.81265	7.92205	6.63933	GABARAP	GABA(A) receptor-associated protein	11337	605125	17
8014664	-1.64	0.320395	0.00108417	0.0033187	-1	-2.99	0.125715	1.66e-06	6e-06	-1	-1.35	0.392375	0.00497834	0.0148157	-1	2.03	4.09818	2.33e-05	6.85e-05	1	0.39	1.31304	0.317676	0.563264	0	-0.96	0.515203	0.0165299	0.0501356	0	3.86964	5.51172	6.86141	5.90462	---	---	NA	NA
8016245	-1.01	0.494903	0.000591147	0.00207691	-1	-2.12	0.229989	6.71e-08	5.34e-07	-1	-1.11	0.464716	0.000215905	0.0016033	-1	1.9	3.74028	1.32e-08	2.75e-07	1	0.89	1.85108	0.000589543	0.0270647	0	-0.22	0.860224	0.318044	0.430147	0	5.05202	6.0668	7.17238	6.95516	LRRC37A4	leucine rich repeat containing 37, member A4 (pseudogene)	55073	NA	17
8016739	-1.06	0.477974	0.000676121	0.00229453	-1	-2.43	0.18574	1.9e-08	2.29e-07	-1	-1.36	0.388599	3.86e-05	0.000523874	-1	1.25	2.38563	1.81e-05	5.57e-05	1	0.19	1.14027	0.429795	0.661658	0	-1.17	0.443108	3.17e-05	0.000718194	-1	5.05149	6.11648	7.48013	6.30586	TOB1	transducer of ERBB2, 1	10140	605523	17
8017212	-1.64	0.319787	7.73e-05	0.00046633	-1	-2.75	0.148774	1.21e-07	8.1e-07	-1	-1.1	0.465228	0.00337697	0.0111052	-1	2.06	4.18173	5.35e-07	3.71e-06	1	0.42	1.33726	0.174563	0.411673	0	-0.68	0.622133	0.0257736	0.068715	0	3.58463	5.22944	6.33343	5.64873	USP32	ubiquitin specific peptidase 32	84669	607740	17
8017312	-1.6	0.328878	2.47e-05	0.000215268	-1	-3.03	0.12229	3.33e-09	7.2e-08	-1	-1.43	0.371839	9.32e-05	0.000916131	-1	2.21	4.62447	2.74e-08	4.64e-07	1	0.6	1.52089	0.0329844	0.178492	0	-0.82	0.565525	0.00398822	0.0188774	0	4.42578	6.03016	7.45741	6.63507	MED13	mediator complex subunit 13	9969	603808	17
8017421	-1.34	0.394531	0.000157636	0.000787092	-1	-2.66	0.157963	1.21e-08	1.67e-07	-1	-1.32	0.400381	0.00014058	0.00120513	-1	1.58	2.9902	2.09e-06	1.01e-05	1	0.24	1.17972	0.362624	0.605745	0	-1.08	0.47234	0.000184706	0.00242962	-1	5.33223	6.67402	7.99457	6.91247	CCDC47	coiled-coil domain containing 47	57003	NA	17
8017964	-1.17	0.444381	1.14e-06	3.07e-05	-1	-2.54	0.171384	2.75e-12	1.31e-09	-1	-1.37	0.385668	7.07e-08	8.22e-06	-1	2.15	4.43992	8.33e-13	9.1e-10	1	0.98	1.97302	1.9e-06	0.00138257	0	-0.39	0.76093	0.0134652	0.0433162	0	3.49233	4.66246	6.03703	5.64287	ABCA6	ATP-binding cassette, sub-family A (ABC1), member 6	23460	612504	17
8019521	-1.15	0.451975	0.0134121	0.0245615	-1	-2.2	0.217804	4.85e-05	0.000100754	-1	-1.05	0.481894	0.0185686	0.0395967	-1	1.96	3.88694	2.01e-05	6.06e-05	1	0.81	1.7568	0.0395799	0.196034	0	-0.24	0.846592	0.498113	0.598951	0	4.14523	5.29092	6.34413	6.10387	FOXK2	forkhead box K2	NA	NA
8019649	-1.64	0.320395	0.00108417	0.0033187	-1	-2.99	0.125715	1.66e-06	6e-06	-1	-1.35	0.392375	0.00497834	0.0148157	-1	2.03	4.09818	2.33e-05	6.85e-05	1	0.39	1.31304	0.317676	0.563264	0	-0.96	0.515203	0.0165299	0.0501356	0	3.86964	5.51172	6.86141	5.90462	---	---	NA	NA
8019924	-1.23	0.4256	0.000613701	0.00214051	-1	-2.47	0.180646	1.33e-07	8.73e-07	-1	-1.24	0.42445	0.000516379	0.0029414	-1	1.36	2.56258	5.3e-05	0.000135431	1	0.13	1.09064	0.650327	0.817685	0	-1.11	0.46292	0.000303179	0.00345213	-1	4.77604	6.00847	7.2448	6.13364	MYL12A	myosin, light chain 12A, regulatory, non-sarcomeric	10627	NA	18
8020129	-1.03	0.490507	0.00663045	0.0138026	-1	-2.04	0.242841	9.27e-06	2.44e-05	-1	-1.01	0.495083	0.00631146	0.0176537	-1	1.29	2.43894	0.000252436	0.000520638	1	0.26	1.19632	0.39821	0.637234	0	-0.76	0.592275	0.0144174	0.0454563	0	4.69761	5.72526	6.73952	5.98386	VAPA	VAMP (vesicle-associated membrane protein)-associated protein A, 33kDa	9218	605703	18
8021015	-1.25	0.421019	0.00112496	0.0034177	-1	-2.52	0.173854	3.92e-07	1.95e-06	-1	-1.28	0.412937	0.000857579	0.00418491	-1	1.87	3.6672	1.73e-06	8.79e-06	1	0.63	1.54396	0.0439366	0.206746	0	-0.65	0.63756	0.031424	0.0785853	0	4.11998	5.36802	6.64403	5.99466	PIK3C3	phosphoinositide-3-kinase, class 3	5289	602609	18
8023195	-1.95	0.259653	6.16e-10	4.49e-07	-1	-3.08	0.11853	8.66e-13	6.76e-10	-1	-1.13	0.456496	6.65e-06	0.000172696	-1	2.22	4.67218	1.04e-11	3.2e-09	1	0.28	1.21314	0.11306	0.329826	0	-0.85	0.553795	4.5e-05	0.0009207	0	3.74621	5.69155	6.82288	5.97031	SMAD2	SMAD family member 2	4087	601366	18, 18, 18
8023415	-1.19	0.437767	1.17e-05	0.000131041	-1	-2.33	0.198225	3.25e-10	1.86e-08	-1	-1.14	0.45281	1.43e-05	0.000279363	-1	2.32	4.9954	1.08e-11	3.2e-09	1	1.13	2.18682	3.82e-06	0.0023218	1	-0.01	0.990214	0.935795	0.955578	0	4.99842	6.19018	7.33321	7.31902	TCF4	transcription factor 4	6925	602272, 610954	18
8023561	-1.36	0.389702	5.83e-05	0.000386053	-1	-2.71	0.153343	2.64e-09	6.22e-08	-1	-1.35	0.393488	4.88e-05	0.000614359	-1	1.86	3.63301	5.65e-08	7.6e-07	1	0.5	1.41579	0.0474412	0.214112	0	-0.84	0.557097	0.00111297	0.00804431	0	4.51905	5.87861	7.22421	6.38022	LMAN1	lectin, mannose-binding, 1	3998	227300, 601567	18
8023672	-1.1	0.465764	4.33e-05	0.00031541	-1	-2.26	0.209255	2.29e-09	5.79e-08	-1	-1.15	0.449274	2.44e-05	0.000386143	-1	1.11	2.15468	8.3e-06	2.99e-05	1	0.01	1.00357	0.978838	0.990232	0	-1.15	0.450879	3.25e-06	0.000140802	-1	5.78758	6.88991	8.04424	6.89506	VPS4B	vacuolar protein sorting 4 homolog B (S. cerevisiae)	9525	609983	18
8023855	-2.79	0.14477	2.28e-11	1.24e-07	-1	-3.86	0.0687791	2.94e-13	5.35e-10	-1	-1.07	0.475092	0.000121688	0.00109931	-1	1.79	3.46902	3.01e-09	1.02e-07	1	-0.99	0.50221	4.5e-05	0.0078134	0	-2.07	0.238596	4.76e-10	2.27e-07	-1	5.05801	7.84617	8.91989	6.85253	CYB5A	cytochrome b5 type A (microsomal)	1528	250790	18
8027429	-1.28	0.412557	0.0178306	0.0311575	-1	-2.73	0.150908	3.19e-05	7.04e-05	-1	-1.45	0.365786	0.007353	0.0196902	-1	1.98	3.94545	0.000147469	0.000325653	1	0.7	1.62773	0.122574	0.343816	0	-0.75	0.595399	0.0870579	0.164642	0	3.59547	4.8728	6.32373	5.57566	---	---	NA	NA
8031646	-1.68	0.312959	0.000498589	0.0018295	-1	-2.83	0.14017	9.62e-07	3.91e-06	-1	-1.16	0.447886	0.00842281	0.0218226	-1	2.68	6.42874	1.04e-07	1.15e-06	1	1.01	2.01193	0.00998296	0.0993029	0	-0.15	0.901117	0.659992	0.741761	0	4.41524	6.0912	7.24999	7.09978	MGC9913	hypothetical protein MGC9913	386759	NA
8034342	-1.02	0.494581	0.00342889	0.00811809	-1	-2.5	0.177068	1.7e-07	1.04e-06	-1	-1.48	0.358016	8.72e-05	0.000878216	-1	1.43	2.69082	3e-05	8.4e-05	1	0.41	1.33083	0.145659	0.375497	0	-1.07	0.476458	0.000553097	0.0050532	-1	5.27326	6.28898	7.77088	6.7013	ZNF625	zinc finger protein 625	90589	NA	19
8040386	-2.05	0.241932	2.64e-07	1.38e-05	-1	-3.61	0.0816978	5.28e-11	6.01e-09	-1	-1.57	0.33769	1.44e-05	0.000279363	-1	2.7	6.48257	4.58e-10	3.03e-08	1	0.65	1.56834	0.0169379	0.126684	0	-0.92	0.529612	0.00112689	0.00810457	0	4.78814	6.83547	8.4017	7.48471	DDX1	DEAD (Asp-Glu-Ala-Asp) box polypeptide 1	1653	601257	2
8040552	-1.16	0.448742	0.000700824	0.00235642	-1	-2.2	0.217139	3.97e-07	1.97e-06	-1	-1.05	0.483884	0.00155622	0.00637595	-1	1.61	3.06139	2.5e-06	1.16e-05	1	0.46	1.37377	0.0901162	0.294223	0	-0.59	0.664746	0.0263786	0.0696646	0	4.38982	5.54586	6.59313	6.004	NCOA1	nuclear receptor coactivator 1	8648	602691	2
8041122	-1.55	0.340881	0.000633888	0.00219482	-1	-2.59	0.165562	2.43e-06	8.11e-06	-1	-1.04	0.485688	0.013013	0.03022	-1	1.99	3.96651	7.08e-06	2.63e-05	1	0.44	1.35211	0.218034	0.462693	0	-0.61	0.656702	0.0782694	0.152154	0	5.83045	7.38311	8.42501	7.81832	PPP1CB	protein phosphatase 1, catalytic subunit, beta isoform	5500	600590	2, 2
8041179	-1.02	0.491924	4.13e-05	0.000304261	-1	-2.42	0.187223	5.1e-10	2.37e-08	-1	-1.39	0.380594	1.03e-06	5.35e-05	-1	1.64	3.12004	4.9e-09	1.44e-07	1	0.62	1.53482	0.00210398	0.0470063	0	-0.78	0.584145	0.000308281	0.00348842	0	3.94161	4.9651	6.35877	5.58317	CLIP4	CAP-GLY domain containing linker protein family, member 4	79745	NA	2
8041713	-1.23	0.427438	0.000207784	0.000960871	-1	-2.28	0.206604	9.31e-08	6.6e-07	-1	-1.05	0.483354	0.0009014	0.00432918	-1	1.8	3.48764	1.77e-07	1.66e-06	1	0.58	1.49075	0.0270096	0.160196	0	-0.47	0.72056	0.0549121	0.117447	0	3.54722	4.77344	5.82228	5.34947	PPM1B	protein phosphatase 1B (formerly 2C), magnesium-dependent, beta isoform	5495	603770	2, 2, 2
8042270	-1.99	0.250885	1.77e-08	3.28e-06	-1	-3.01	0.124236	1.56e-11	3.03e-09	-1	-1.01	0.495191	0.000189707	0.0014655	-1	2.19	4.56769	1.72e-10	1.62e-08	1	0.2	1.14596	0.34317	0.589568	0	-0.82	0.567471	0.00030196	0.00344184	0	3.72486	5.71976	6.7337	5.91632	UGP2	UDP-glucose pyrophosphorylase 2	7360	191760	2, 2
8042291	-1.18	0.440034	0.000239173	0.0010671	-1	-2.3	0.20238	5.88e-08	4.84e-07	-1	-1.12	0.459919	0.000397358	0.0024443	-1	1.55	2.92689	1.48e-06	7.8e-06	1	0.37	1.28793	0.14028	0.369393	0	-0.76	0.592343	0.00335618	0.0166955	0	5.38991	6.57423	7.69478	6.93928	AFTPH	aftiphilin	54812	NA	2
8042468	-1.41	0.377372	1.79e-07	1.13e-05	-1	-2.98	0.126587	3.55e-13	5.55e-10	-1	-1.58	0.335442	1.95e-08	3.72e-06	-1	1.85	3.60191	1.03e-10	1.27e-08	1	0.44	1.35926	0.013556	0.114975	0	-1.13	0.455954	2.91e-07	2.7e-05	-1	4.71353	6.11947	7.69534	6.5623	ANXA4	annexin A4	307	106491	2
8042519	-1.68	0.311745	0.000103147	0.000579095	-1	-3.18	0.110321	1.63e-08	2.05e-07	-1	-1.5	0.353883	0.000285768	0.00192993	-1	2.04	4.11648	1.08e-06	6.15e-06	1	0.36	1.28329	0.260991	0.508536	0	-1.14	0.454136	0.000832069	0.00662867	-1	4.39758	6.07914	7.5778	6.43899	PCYOX1	prenylcysteine oxidase 1	51449	610995	2
8043820	-1.07	0.475898	0.0027793	0.00685636	-1	-2.62	0.162745	7.9e-08	5.96e-07	-1	-1.55	0.341974	5.99e-05	0.000700692	-1	1.62	3.07301	6.68e-06	2.52e-05	1	0.55	1.46244	0.0623618	0.245538	0	-1	0.500116	0.00108636	0.00791138	0	5.36118	6.43246	7.9805	6.98084	UNC50	unc-50 homolog (C. elegans)	25972	NA	2
8044161	-1.4	0.379234	0.000162448	0.000804952	-1	-2.56	0.170119	9.99e-08	7.01e-07	-1	-1.16	0.448585	0.00106379	0.0048512	-1	1.94	3.83146	3.76e-07	2.85e-06	1	0.54	1.45302	0.0603326	0.242442	0	-0.62	0.651803	0.0282982	0.0734572	0	4.89526	6.2941	7.45065	6.83316	RGPD4	RANBP2-like and GRIP domain containing 4	285190	NA	2
8044263	-1.31	0.402123	0.000443439	0.00167724	-1	-2.75	0.148458	3.47e-08	3.36e-07	-1	-1.44	0.369185	0.000142787	0.00121365	-1	2.24	4.73894	4.9e-08	6.9e-07	1	0.93	1.90563	0.00309361	0.0559685	0	-0.51	0.703531	0.0702076	0.140433	0	4.24823	5.56253	7.00011	6.4928	RANBP2	RAN binding protein 2	5903	601181	2
8044304	-1.55	0.340671	5.93e-05	0.000391265	-1	-2.57	0.168777	1.23e-07	8.2e-07	-1	-1.01	0.495424	0.0037367	0.0120241	-1	2.13	4.37852	1.06e-07	1.17e-06	1	0.58	1.49164	0.049058	0.2179	0	-0.44	0.738992	0.117097	0.204113	0	4.85636	6.4099	7.42317	6.9868	RGPD6	RANBP2-like and GRIP domain containing 6	729540	NA	2, 2
8044686	-1.28	0.412661	0.000351431	0.00141674	-1	-2.94	0.130577	5.2e-09	9.65e-08	-1	-1.66	0.316427	1.37e-05	0.000270212	-1	2.05	4.15408	6.12e-08	8.01e-07	1	0.78	1.71422	0.00746137	0.0859434	0	-0.88	0.542427	0.00208149	0.0121683	0	5.00144	6.27841	7.93847	7.05597	ACTR3	ARP3 actin-related protein 3 homolog (yeast)	10096	604222	2
8044745	-2.02	0.246766	4.64e-06	7.31e-05	-1	-3.31	0.101043	2.32e-09	5.82e-08	-1	-1.29	0.409469	0.000677817	0.00354389	-1	2.72	6.57455	2.8e-09	9.84e-08	1	0.7	1.62238	0.0260546	0.157761	0	-0.59	0.664312	0.0426432	0.0977217	0	4.66631	6.68509	7.97327	7.3832	DDX18	DEAD (Asp-Glu-Ala-Asp) box polypeptide 18	8886	606355	2
8045587	-1.44	0.367334	1.89e-06	4.14e-05	-1	-3.08	0.118069	3.83e-11	4.98e-09	-1	-1.64	0.321422	4.73e-07	3.1e-05	-1	2.21	4.63238	1.49e-10	1.56e-08	1	0.77	1.70163	0.000851366	0.03197	0	-0.87	0.546941	0.00028114	0.00331393	0	4.19485	5.63969	7.27715	6.40661	ACVR2A	activin A receptor, type IIA	92	102581	2
8045919	-1.16	0.447313	0.0208022	0.035441	-1	-2.62	0.162209	2.21e-05	5.15e-05	-1	-1.46	0.362629	0.00425286	0.0132256	-1	2.12	4.3444	2.88e-05	8.13e-05	1	0.96	1.94331	0.0284296	0.164862	0	-0.5	0.7047	0.209086	0.31442	0	4.56799	5.72864	7.19207	6.68715	2012-03-07	membrane-associated ring finger (C3HC4) 7	64844	NA	2
8045946	-1.1	0.468033	0.00226689	0.00584558	-1	-2.8	0.143246	1.44e-08	1.88e-07	-1	-1.71	0.30606	1.36e-05	0.000269227	-1	1.36	2.56609	3.91e-05	0.00010501	1	0.26	1.20102	0.347478	0.592371	0	-1.44	0.367583	1.19e-05	0.000364248	-1	4.51651	5.61183	7.31994	5.87608	PSMD14	proteasome (prosome, macropain) 26S subunit, non-ATPase, 14	10213	607173	2
8046213	-1.16	0.449041	6.01e-05	0.000393798	-1	-2.32	0.200917	8.32e-09	1.29e-07	-1	-1.16	0.447435	6.8e-05	0.000754703	-1	1.92	3.78952	3.49e-09	1.15e-07	1	0.77	1.70165	0.00115714	0.0365031	0	-0.39	0.761377	0.0668695	0.135387	0	3.98482	5.13991	6.30015	5.90684	UBR3	ubiquitin protein ligase E3 component n-recognin 3 (putative)	130507	NA	2
8046333	-1.22	0.428304	0.00307019	0.0074314	-1	-3.63	0.0807822	2.67e-09	6.24e-08	-1	-2.41	0.188609	9.56e-07	5.05e-05	-1	2.06	4.15677	1.55e-06	8.05e-06	1	0.83	1.78036	0.0168857	0.126597	0	-1.57	0.335794	3.32e-05	0.000739989	-1	5.01422	6.23751	8.64404	7.06969	CYBRD1	cytochrome b reductase 1	79901	605745	2
8046346	-1.11	0.463607	0.000791508	0.00259429	-1	-2.24	0.211636	1.72e-07	1.05e-06	-1	-1.13	0.456498	0.000561766	0.00312947	-1	1.45	2.73366	5.52e-06	2.17e-05	1	0.34	1.26734	0.184091	0.422487	0	-0.79	0.578539	0.00311238	0.0160327	0	3.34617	4.4552	5.58652	4.79701	HAT1	histone acetyltransferase 1	8520	603053	2
8046726	-1.47	0.361258	1.33e-07	9.37e-06	-1	-2.57	0.167951	2.53e-11	4.02e-09	-1	-1.1	0.464907	9.97e-06	0.000224163	-1	1.85	3.59894	3.83e-10	2.81e-08	1	0.38	1.30015	0.038378	0.192527	0	-0.73	0.604446	0.000265521	0.00316512	0	5.44857	6.91747	8.02245	7.29614	SSFA2	sperm specific antigen 2	6744	118990	2
8046861	-1.13	0.458151	0.00243733	0.00617008	-1	-2.48	0.179516	3.19e-07	1.67e-06	-1	-1.35	0.391828	0.000387176	0.00240467	-1	1.91	3.76333	8.66e-07	5.24e-06	1	0.79	1.72417	0.0122475	0.109386	0	-0.57	0.67558	0.0509962	0.111066	0	4.48559	5.6117	6.9634	6.3976	ITGAV	integrin, alpha V (vitronectin receptor, alpha polypeptide, antigen CD51)	3685	193210	2, 2
8046975	-1.19	0.436805	2.4e-05	0.000211653	-1	-2.37	0.193783	3.02e-09	6.88e-08	-1	-1.17	0.443637	3.82e-05	0.000520956	-1	2.24	4.73091	8.58e-11	1.15e-08	1	1.05	2.06649	2.44e-05	0.00564898	1	-0.13	0.91677	0.53033	0.6282	0	3.75048	4.94542	6.11797	5.9926	WDR75	WD repeat domain 75	84128	NA	2
8047339	-1.4	0.377702	5.32e-06	7.92e-05	-1	-2.85	0.138486	5.7e-11	6.22e-09	-1	-1.45	0.366655	2.4e-06	8.91e-05	-1	1.92	3.79659	1.9e-09	7.66e-08	1	0.52	1.43398	0.0186382	0.134301	0	-0.93	0.525775	8.32e-05	0.00141904	0	4.07764	5.48232	6.92983	6.00235	BZW1	basic leucine zipper and W2 domains 1	9689	NA	2
8047401	-1.24	0.423419	0.0086239	0.0171209	-1	-2.71	0.152372	5.21e-06	1.52e-05	-1	-1.47	0.359862	0.00218339	0.00803052	-1	2.12	4.36155	1.06e-05	3.61e-05	1	0.89	1.84676	0.0286697	0.165419	0	-0.59	0.66458	0.118102	0.205372	0	2.79168	4.03152	5.506	4.91652	---	---	NA	NA
8047538	-1.66	0.31668	2.03e-07	1.21e-05	-1	-2.76	0.147145	6.71e-11	6.79e-09	-1	-1.11	0.46465	5.41e-05	0.000658926	-1	2.17	4.50449	1.92e-10	1.74e-08	1	0.51	1.42648	0.0165698	0.126043	0	-0.59	0.662814	0.00485192	0.0215885	0	4.1161	5.775	6.88078	6.28746	BMPR2	bone morphogenetic protein receptor, type II (serine/threonine kinase)	659	178600, 265450, 600799	2
8047596	-1.62	0.324257	1.09e-05	0.000125609	-1	-2.7	0.153381	6.58e-09	1.11e-07	-1	-1.08	0.473023	0.000883828	0.00426728	-1	2.49	5.63303	6.37e-10	3.7e-08	1	0.87	1.82655	0.00210821	0.0470063	0	-0.21	0.863998	0.382111	0.492069	0	3.12443	4.74922	5.82924	5.61834	NBEAL1	neurobeachin-like 1	65065	609816	2, 2
8047606	-1.36	0.388892	0.000154647	0.000776146	-1	-2.7	0.153505	1.62e-08	2.04e-07	-1	-1.34	0.394725	0.000153934	0.00128153	-1	2.41	5.31789	4.27e-09	1.32e-07	1	1.05	2.06808	0.000606156	0.0272342	1	-0.29	0.816324	0.254107	0.362949	0	3.84439	5.20695	6.54803	6.25525	NBEAL1	neurobeachin-like 1	65065	609816	2, 2
8048146	-1.07	0.474697	0.00826352	0.0165255	-1	-2.21	0.216843	1.24e-05	3.14e-05	-1	-1.13	0.456802	0.00550997	0.0159718	-1	1.61	3.05575	6.06e-05	0.000151797	1	0.54	1.45056	0.114726	0.331945	0	-0.59	0.662617	0.071995	0.142863	0	5.52516	6.60008	7.73044	7.13669	XRCC5	X-ray repair complementing defective repair in Chinese hamster cells 5 (double-strand-break rejoining)	7520	194364	2
8048234	-1.21	0.432101	0.00290754	0.00710722	-1	-2.33	0.19905	3.81e-06	1.17e-05	-1	-1.12	0.460656	0.00485339	0.0145668	-1	1.45	2.72272	0.000147624	0.000325864	1	0.23	1.17649	0.46879	0.693587	0	-0.88	0.541957	0.00821575	0.0308189	0	6.79017	8.00073	9.11896	8.23521	ARPC2	actin related protein 2/3 complex, subunit 2, 34kDa	10109	604224	2, 2
8050278	-1.25	0.420958	0.000297184	0.00125039	-1	-2.47	0.180926	5.49e-08	4.63e-07	-1	-1.22	0.429796	0.000337582	0.00217065	-1	1.26	2.38864	5.99e-05	0.00015028	1	0.01	1.00552	0.97555	0.989399	0	-1.21	0.432167	6.03e-05	0.00114507	-1	5.1172	6.36545	7.58373	6.37339	PDIA6	protein disulfide isomerase family A, member 6	10130	611099	2
8050302	-1.5	0.3544	2.03e-06	4.29e-05	-1	-2.5	0.176385	1.19e-09	3.94e-08	-1	-1.01	0.497702	0.000280468	0.0019099	-1	2.26	4.77632	4.42e-10	2.97e-08	1	0.76	1.69273	0.00151929	0.0407042	0	-0.25	0.842473	0.23311	0.340613	0	5.04505	6.5416	7.54825	7.30095	ROCK2	Rho-associated, coiled-coil containing protein kinase 2	9475	604002	2
8050548	-1.83	0.281414	0.000647259	0.00223022	-1	-3.46	0.0911392	3.95e-07	1.96e-06	-1	-1.63	0.323861	0.0016956	0.00675214	-1	2.56	5.91062	2.53e-06	1.17e-05	1	0.73	1.66333	0.0852774	0.287884	0	-0.89	0.53869	0.031856	0.0793208	0	6.30523	8.13446	9.76102	8.86854	LAPTM4A	lysosomal protein transmembrane 4 alpha	9741	NA	2
8050565	-1.47	0.359846	6.6e-06	8.91e-05	-1	-2.82	0.14151	2.72e-10	1.69e-08	-1	-1.35	0.393252	1.67e-05	0.000307948	-1	2.21	4.62968	5.59e-10	3.37e-08	1	0.74	1.66597	0.00278114	0.0539039	0	-0.61	0.655146	0.00749759	0.0288159	0	5.03334	6.50788	7.85436	7.24425	PUM2	pumilio homolog 2 (Drosophila)	23369	607205	2
8051413	-2.01	0.248593	4.47e-06	7.15e-05	-1	-3.11	0.116041	4.14e-09	8.31e-08	-1	-1.1	0.466793	0.00235335	0.00846849	-1	2.33	5.02196	2.61e-08	4.49e-07	1	0.32	1.24842	0.279356	0.526546	0	-0.78	0.582754	0.00782619	0.0297455	0	3.87773	5.88588	6.98502	6.20598	FAM98A	family with sequence similarity 98, member A	25940	NA	2
8051589	-1.2	0.435359	0.0060603	0.0128382	-1	-2.49	0.177413	5.2e-06	1.51e-05	-1	-1.3	0.40751	0.00315011	0.0105077	-1	2.04	4.11109	6.12e-06	2.34e-05	1	0.84	1.7898	0.0244763	0.153149	0	-0.46	0.729361	0.185806	0.28748	0	5.42886	6.62859	7.92368	7.46839	ATL2	atlastin GTPase 2	64225	609368	2
8051882	-1.46	0.362257	0.000498245	0.00182946	-1	-2.72	0.151789	2.53e-07	1.4e-06	-1	-1.25	0.419009	0.00169886	0.00676264	-1	2.1	4.2873	6.98e-07	4.48e-06	1	0.64	1.5531	0.0551656	0.231218	0	-0.62	0.650764	0.0484183	0.107029	0	4.14409	5.60901	6.86395	6.24416	LRPPRC	leucine-rich PPR-motif containing	10128	220111, 607544	2
8052024	-1.16	0.44663	0.00103706	0.00320138	-1	-2.3	0.203145	4.55e-07	2.18e-06	-1	-1.14	0.454841	0.00117088	0.0052219	-1	1.93	3.81367	3.59e-07	2.76e-06	1	0.77	1.7033	0.00969072	0.0979951	0	-0.37	0.774729	0.171576	0.270869	0	4.39127	5.55412	6.69068	6.32245	FBXO11	F-box protein 11	80204	607871	2, 2, 2
8052307	-1.23	0.427598	4.4e-05	0.000318189	-1	-2.69	0.155279	5.82e-10	2.59e-08	-1	-1.46	0.363144	4.06e-06	0.000124485	-1	1.86	3.61904	1.1e-08	2.39e-07	1	0.63	1.54749	0.00712376	0.083671	0	-0.83	0.561962	0.000537171	0.00498034	0	4.49101	5.71669	7.17807	6.34662	SMEK2	SMEK homolog 2, suppressor of mek1 (Dictyostelium)	57223	610352	2
8052355	-1.27	0.414832	0.000388079	0.00151774	-1	-2.81	0.142253	1.8e-08	2.2e-07	-1	-1.54	0.342917	4.33e-05	0.000562634	-1	2.06	4.15581	1.55e-07	1.51e-06	1	0.79	1.72396	0.0080829	0.0894273	0	-0.76	0.591177	0.00842427	0.0313186	0	4.4481	5.7175	7.26157	6.50323	EFEMP1	EGF-containing fibulin-like extracellular matrix protein 1	2202	126600, 601548	2, 2
8052443	-1.43	0.37187	0.000474406	0.00176746	-1	-2.68	0.155853	2.09e-07	1.21e-06	-1	-1.25	0.419106	0.00132792	0.005717	-1	2.21	4.61249	2.16e-07	1.91e-06	1	0.78	1.71525	0.0180034	0.131194	0	-0.48	0.718871	0.113581	0.200071	0	4.68387	6.111	7.36561	6.88942	USP34	ubiquitin specific peptidase 34	9736	NA	2
8052680	-1.23	0.426543	0.00429853	0.00971011	-1	-2.5	0.177206	2.12e-06	7.27e-06	-1	-1.27	0.415448	0.00263532	0.00919753	-1	1.6	3.04192	7.4e-05	0.000180411	1	0.38	1.29751	0.277361	0.524558	0	-0.89	0.539048	0.00964529	0.0344417	0	6.97933	8.20857	9.47583	8.58432	RAB1A	RAB1A, member RAS oncogene family	5861	179508	2
8053064	-1.01	0.497548	0.00025929	0.00112921	-1	-2.03	0.245572	5.74e-08	4.75e-07	-1	-1.02	0.493565	0.000247706	0.00174679	-1	1.32	2.50229	1.19e-06	6.62e-06	1	0.32	1.24501	0.133923	0.36018	0	-0.7	0.614492	0.00194236	0.0116595	0	4.9192	5.92629	6.94498	6.24245	MOBKL1B	MOB1, Mps One Binder kinase activator-like 1B (yeast)	55233	609281	2
8054092	-1.07	0.475197	7.6e-05	0.000462146	-1	-2.49	0.178331	3.49e-10	1.96e-08	-1	-1.41	0.375278	1.6e-06	6.95e-05	-1	1.78	3.42908	4.7e-09	1.39e-07	1	0.7	1.62949	0.00149559	0.0405665	0	-0.71	0.611511	0.000928302	0.00717629	0	4.45705	5.53045	6.94442	6.23487	TMEM131	transmembrane protein 131	23505	NA	2
8054414	-1.47	0.36127	0.000158266	0.000789235	-1	-2.74	0.149582	6.77e-08	5.38e-07	-1	-1.27	0.414044	0.000672731	0.00352692	-1	2.12	4.33495	2.01e-07	1.81e-06	1	0.65	1.56609	0.0335039	0.180163	0	-0.62	0.64843	0.0335642	0.0821336	0	4.84254	6.31139	7.58353	6.95856	RGPD4	RANBP2-like and GRIP domain containing 4	285190	NA	2
8054532	-1.7	0.307748	0.000100057	0.000566092	-1	-2.77	0.14633	2.77e-07	1.5e-06	-1	-1.07	0.475487	0.00642085	0.01785	-1	2.3	4.91942	2.69e-07	2.25e-06	1	0.6	1.51394	0.0721357	0.266055	0	-0.47	0.719859	0.133584	0.225271	0	4.9893	6.68948	7.76201	7.28779	RGPD5	RANBP2-like and GRIP domain containing 5	84220	NA	2, 2, 2, 2, 2
8054557	-1.62	0.32425	1.11e-05	0.000126384	-1	-2.69	0.154612	1.48e-08	1.91e-07	-1	-1.07	0.47683	0.00121653	0.00537646	-1	2.19	4.56073	1.57e-08	3.09e-07	1	0.56	1.47882	0.0367959	0.188865	0	-0.5	0.705144	0.0534257	0.115092	0	4.65099	6.27581	7.34426	6.84025	RGPD5	RANBP2-like and GRIP domain containing 5	84220	NA	2, 2, 2, 2, 2
8054676	-1.8	0.287305	1.98e-05	0.000185609	-1	-2.95	0.129412	3.22e-08	3.21e-07	-1	-1.15	0.450434	0.00216411	0.00799913	-1	2.4	5.28082	3.92e-08	5.91e-07	1	0.6	1.51721	0.0527768	0.225617	0	-0.55	0.6834	0.0658605	0.133864	0	4.99828	6.79762	7.94824	7.39904	RGPD5	RANBP2-like and GRIP domain containing 5	84220	NA	2, 2, 2, 2, 2
8054888	-1.36	0.388782	3.66e-07	1.65e-05	-1	-2.49	0.178448	1.51e-11	3.03e-09	-1	-1.12	0.458992	4.6e-06	0.000136542	-1	1.7	3.24035	4.15e-10	2.88e-08	1	0.33	1.25979	0.0570702	0.235615	0	-0.79	0.578235	4.77e-05	0.000965639	0	4.40366	5.76662	6.89008	6.09981	CLASP1	cytoplasmic linker associated protein 1	23332	605852	2
8055672	-1.74	0.299953	0.00015627	0.000782135	-1	-3.55	0.0852105	9.23e-09	1.39e-07	-1	-1.82	0.284079	7.67e-05	0.000820357	-1	2.24	4.70796	8.28e-07	5.08e-06	1	0.5	1.41217	0.151042	0.382098	0	-1.32	0.401167	0.000424071	0.00421028	-1	3.92531	5.6625	7.47813	6.16041	MMADHC	methylmalonic aciduria (cobalamin deficiency) cblD type, with homocystinuria	27249	277410, 611935	2
8056201	-2.74	0.149384	6.5e-07	2.2e-05	-1	-4.82	0.0353127	8.71e-11	7.86e-09	-1	-2.08	0.23639	2.6e-05	0.000399713	-1	3.71	13.0964	3.8e-10	2.81e-08	1	0.97	1.9564	0.0115128	0.105842	0	-1.11	0.462471	0.00312157	0.0160523	-1	4.10996	6.85286	8.93363	7.82106	RBMS1	RNA binding motif, single stranded interacting protein 1	5937	602310	2, 2
8056977	-1.04	0.487567	0.00165462	0.00458469	-1	-2.53	0.173155	2.81e-08	2.94e-07	-1	-1.49	0.355141	2.85e-05	0.000426259	-1	1.63	3.09371	1.66e-06	8.5e-06	1	0.59	1.50839	0.0291965	0.166496	0	-0.9	0.53569	0.00118106	0.00841053	0	5.54979	6.58612	8.07966	7.17913	NFE2L2	nuclear factor (erythroid-derived 2)-like 2	4780	600492	2, 2
8057517	-1.33	0.398837	0.000133661	0.000696735	-1	-2.92	0.132016	2.04e-09	5.4e-08	-1	-1.6	0.331003	1.12e-05	0.000238869	-1	2.03	4.09569	3.5e-08	5.47e-07	1	0.71	1.63351	0.0100294	0.0993029	0	-0.89	0.540698	0.00124279	0.00869159	0	4.55607	5.8822	7.47728	6.59018	NCKAP1	NCK-associated protein 1	10787	604891	2
8057554	-1.65	0.31915	0.000615367	0.00214359	-1	-3.05	0.120835	6.7e-07	2.97e-06	-1	-1.4	0.378616	0.00257613	0.00906621	-1	1.92	3.79617	2.85e-05	8.08e-05	1	0.28	1.21155	0.456581	0.684433	0	-1.12	0.458712	0.00435493	0.0200521	-1	4.89828	6.54597	7.94717	6.82282	CACYBP	calcyclin binding protein	27101	606186	1, 1
8058024	-1.6	0.329635	2.56e-08	3.91e-06	-1	-2.74	0.150183	4.26e-12	1.63e-09	-1	-1.13	0.455603	5.08e-06	0.000145046	-1	2.27	4.80692	3.31e-12	1.99e-09	1	0.66	1.58453	0.000668315	0.0291468	0	-0.47	0.721917	0.00831427	0.0310925	0	5.77914	7.38019	8.51434	8.04425	SF3B1	splicing factor 3b, subunit 1, 155kDa	23451	605590	2, 2
8058127	-1.86	0.274937	0.000147002	0.000750175	-1	-2.91	0.133419	8.95e-07	3.69e-06	-1	-1.04	0.485273	0.0167967	0.0366256	-1	3	7.98691	2.66e-08	4.54e-07	1	1.13	2.19589	0.00450899	0.0665759	0	0.09	1.06561	0.79258	0.845403	0	5.63903	7.50186	8.54499	8.63667	CLK1	CDC-like kinase 1	1195	601951	2
8058335	-1.81	0.285845	9.61e-07	2.79e-05	-1	-2.99	0.12618	8.16e-10	3.11e-08	-1	-1.18	0.441428	0.000251428	0.00176403	-1	2.06	4.18109	1.78e-08	3.39e-07	1	0.26	1.19515	0.293761	0.540225	0	-0.92	0.52757	0.00066816	0.00571654	0	3.04464	4.85134	6.03109	5.10852	SUMO1	SMT3 suppressor of mif two 3 homolog 1 (S. cerevisiae)	7341	601912	2
8058428	-1.33	0.396862	0.00042249	0.00161987	-1	-2.38	0.192254	5.04e-07	2.36e-06	-1	-1.05	0.484435	0.00336116	0.0110721	-1	1.5	2.82827	2.28e-05	6.74e-05	1	0.17	1.12243	0.561841	0.762444	0	-0.88	0.543746	0.0037275	0.0179411	0	4.88784	6.22113	7.26676	6.38777	NDUFS1	NADH dehydrogenase (ubiquinone) Fe-S protein 1, 75kDa (NADH-coenzyme Q reductase)	4719	157655, 252010	2
8059393	-1.29	0.410058	0.000513004	0.00186922	-1	-2.78	0.145244	4.41e-08	3.94e-07	-1	-1.5	0.354202	0.000102344	0.000977055	-1	1.84	3.57733	1.42e-06	7.59e-06	1	0.55	1.46691	0.0611963	0.243535	0	-0.94	0.519584	0.00219605	0.0126342	0	5.33793	6.62403	8.12138	7.17681	CUL3	cullin 3	8452	603136	2
8059596	-1.88	0.272587	5.34e-11	1.26e-07	-1	-2.93	0.130899	3.08e-14	1.69e-10	-1	-1.06	0.48021	1.07e-06	5.49e-05	-1	2.25	4.76305	3.43e-14	1.25e-10	1	0.38	1.29834	0.0121383	0.109135	0	-0.68	0.623478	4.52e-05	0.000922668	0	4.43642	6.31164	7.3699	6.68831	TRIP12	thyroid hormone receptor interactor 12	9320	604506	2
8060736	-2.28	0.205321	7.02e-07	2.31e-05	-1	-4.17	0.0555103	7.18e-11	7.05e-09	-1	-1.89	0.270359	1.08e-05	0.000234928	-1	3.51	11.3695	3.35e-11	6.79e-09	1	1.22	2.3344	0.000396117	0.022435	1	-0.66	0.631126	0.029439	0.0754139	0	2.26645	4.55049	6.43755	5.77355	PANK2	pantothenate kinase 2	80025	234200, 606157, 607236	20, 20, 20
8062880	-1.05	0.484218	0.00384751	0.00890097	-1	-2.35	0.196412	4.27e-07	2.09e-06	-1	-1.3	0.405628	0.000434719	0.00260522	-1	1.34	2.52918	7.53e-05	0.000183561	1	0.29	1.22468	0.31203	0.557407	0	-1.01	0.496763	0.000962237	0.00732083	-1	6.35018	7.39645	8.69822	7.68885	YWHAB	tyrosine 3-monooxygenase/tryptophan 5-monooxygenase activation protein, beta polypeptide	7529	601289	20
8063211	-1.01	0.497137	8.23e-05	0.000488771	-1	-2.17	0.221721	1.58e-09	4.62e-08	-1	-1.16	0.445995	1.15e-05	0.00024136	-1	1.53	2.89135	2.1e-08	3.86e-07	1	0.52	1.4374	0.00919818	0.0949436	0	-0.64	0.641072	0.00140116	0.00943108	0	5.2919	6.30019	7.46509	6.82365	NCOA3	nuclear receptor coactivator 3	8202	601937	20
8063283	-1.21	0.431501	0.000122956	0.000655304	-1	-2.42	0.186581	8.69e-09	1.33e-07	-1	-1.21	0.432399	9.94e-05	0.000956817	-1	1.74	3.3508	7.8e-08	9.46e-07	1	0.53	1.44588	0.0288488	0.165884	0	-0.68	0.625195	0.00471976	0.0212137	0	4.54685	5.75941	6.96898	6.29136	CSE1L	CSE1 chromosome segregation 1-like (yeast)	1434	601342	20
8065730	-1.47	0.36216	0.00367313	0.00858294	-1	-2.64	0.16021	1.3e-05	3.28e-05	-1	-1.18	0.442373	0.0146481	0.0330756	-1	1.69	3.22698	0.00028671	0.000581021	1	0.22	1.16869	0.576113	0.770251	0	-0.95	0.516995	0.0195099	0.056107	0	5.84279	7.30809	8.48475	7.53297	EIF2S2	eukaryotic translation initiation factor 2, subunit 2 beta, 38kDa	8894	603908	20
8066417	-1.15	0.450157	1.93e-06	4.17e-05	-1	-2.41	0.18773	2.5e-11	4.01e-09	-1	-1.26	0.417033	5.48e-07	3.4e-05	-1	1.48	2.78725	2.51e-09	9.25e-08	1	0.33	1.2547	0.049396	0.218602	0	-0.93	0.523251	4.53e-06	0.000179501	0	5.26828	6.41978	7.68155	6.74712	SERINC3	serine incorporator 3	10955	607165	20, 20
8067903	-1.31	0.403376	9.21e-06	0.000111964	-1	-2.38	0.192767	2.21e-09	5.63e-08	-1	-1.07	0.477886	0.000118708	0.00108043	-1	1.85	3.61168	5.53e-09	1.55e-07	1	0.54	1.45686	0.0134689	0.114664	0	-0.52	0.696214	0.0140729	0.0446286	0	4.69384	6.00364	7.0689	6.54651	USP25	ubiquitin specific peptidase 25	29761	604736	21
8069561	-1.43	0.370499	0.000108577	0.00059888	-1	-2.94	0.130571	4.87e-09	9.33e-08	-1	-1.5	0.352419	4.86e-05	0.00061282	-1	1.76	3.3895	1.09e-06	6.22e-06	1	0.33	1.25581	0.232594	0.478181	0	-1.18	0.44257	0.000128715	0.00189876	-1	4.21164	5.6441	7.14874	5.97271	BTF3L4	basic transcription factor 3-like 4	91408	NA	1
8069744	-1.52	0.349044	0.000613542	0.00214051	-1	-2.58	0.167509	1.34e-06	5.04e-06	-1	-1.06	0.479909	0.00928571	0.0233822	-1	1.87	3.64849	8.42e-06	3.02e-05	1	0.35	1.27348	0.304679	0.551861	0	-0.71	0.611155	0.0334919	0.0820116	0	3.70404	5.22256	6.28173	5.57134	RWDD2B	RWD domain containing 2B	10069	NA	21
8070083	-1.97	0.256055	1.85e-07	1.15e-05	-1	-3.17	0.11105	7.88e-11	7.42e-09	-1	-1.21	0.433695	0.00011964	0.0010853	-1	2.71	6.55884	5.57e-11	8.96e-09	1	0.75	1.67943	0.00392862	0.0624499	0	-0.46	0.728359	0.049438	0.108734	0	3.96318	5.92865	7.1339	6.67662	TMEM50B	transmembrane protein 50B	757	NA	21
8072344	-1.17	0.443993	0.00889742	0.0175524	-1	-2.55	0.170908	6.1e-06	1.72e-05	-1	-1.38	0.384935	0.00249766	0.0088413	-1	1.88	3.68856	3.24e-05	8.98e-05	1	0.71	1.63769	0.0613891	0.24375	0	-0.67	0.630405	0.0671438	0.135791	0	4.31081	5.48221	6.85952	6.19387	---	---	NA	NA
8072946	-1.65	0.319047	0.00011553	0.000624252	-1	-3.13	0.114101	1.72e-08	2.13e-07	-1	-1.48	0.35763	0.000282516	0.00191813	-1	1.73	3.31632	1.16e-05	3.88e-05	1	0.08	1.05806	0.795269	0.90052	0	-1.4	0.378395	8.47e-05	0.00142859	-1	5.3591	7.00726	8.49072	7.08868	EIF3L	eukaryotic translation initiation factor 3, subunit L	51386	NA	22
8073334	-1.44	0.368314	4.53e-06	7.22e-05	-1	-2.52	0.17405	1.07e-09	3.65e-08	-1	-1.08	0.472559	0.000141637	0.00120956	-1	1.66	3.16055	5.65e-08	7.6e-07	1	0.22	1.16407	0.307632	0.554222	0	-0.86	0.550094	0.000282321	0.00331834	0	5.28109	6.72208	7.80352	6.94127	RBX1	ring-box 1	9978	603814	22
8077450	-1.24	0.42368	0.000144882	0.00074109	-1	-2.27	0.207766	1.08e-07	7.5e-07	-1	-1.03	0.490385	0.00102572	0.00473886	-1	1.33	2.50779	1.14e-05	3.82e-05	1	0.09	1.0625	0.716362	0.857518	0	-0.94	0.521034	0.000546611	0.0050168	0	4.34872	5.58767	6.61569	5.67514	ARL8B	ADP-ribosylation factor-like 8B	55207	NA	3
8077513	-1.4	0.380014	0.000339926	0.0013844	-1	-2.43	0.185085	5.37e-07	2.49e-06	-1	-1.04	0.487049	0.00433872	0.0134011	-1	1.84	3.58538	2.19e-06	1.04e-05	1	0.45	1.36249	0.139332	0.367591	0	-0.59	0.663601	0.0455049	0.102307	0	3.78355	5.17942	6.21728	5.62567	THUMPD3	THUMP domain containing 3	25917	NA	3
8078008	-1.88	0.270801	7.31e-05	0.00044887	-1	-3.32	0.100318	5.5e-08	4.63e-07	-1	-1.43	0.370448	0.00119013	0.00528619	-1	1.91	3.76226	1.23e-05	4.06e-05	1	0.03	1.01882	0.938008	0.973519	0	-1.41	0.377422	0.000312632	0.00352307	-1	4.05385	5.93855	7.3712	5.96545	LSM3	LSM3 homolog, U6 small nuclear RNA associated (S. cerevisiae)	27258	607283	3
8078110	-1.51	0.350926	1.07e-06	2.97e-05	-1	-2.86	0.138082	3.94e-11	4.98e-09	-1	-1.35	0.393479	4.63e-06	0.000137205	-1	2.55	5.86478	1.14e-11	3.2e-09	1	1.04	2.0581	3.22e-05	0.00629243	1	-0.3	0.809821	0.125316	0.214673	0	3.66774	5.1785	6.52414	6.21981	CAPN7	calpain 7	23473	606400	3
8078270	-1.55	0.340465	0.000256286	0.00111965	-1	-2.82	0.141301	1.6e-07	9.94e-07	-1	-1.27	0.415022	0.00157731	0.00643973	-1	2.14	4.41607	8.07e-07	4.97e-06	1	0.59	1.50352	0.075842	0.271573	0	-0.68	0.623993	0.0339102	0.082684	0	6.83505	8.38947	9.65821	8.97781	RPL15	ribosomal protein L15	6138	604174	3
8079153	-1.42	0.373733	0.000285754	0.00121304	-1	-2.96	0.128845	2.22e-08	2.53e-07	-1	-1.54	0.344752	0.000106533	0.00100475	-1	1.37	2.57805	7.61e-05	0.000184963	1	-0.05	0.963503	0.85401	0.93212	0	-1.59	0.332169	8.74e-06	0.000284491	-1	5.09826	6.51818	8.05455	6.46454	ABHD5	abhydrolase domain containing 5	51099	275630, 604780	3
8081055	-1.14	0.455041	0.00159656	0.00446114	-1	-2.68	0.155568	7.01e-08	5.52e-07	-1	-1.55	0.341878	6.44e-05	0.000732818	-1	1.91	3.74995	6.21e-07	4.11e-06	1	0.77	1.70638	0.011057	0.103568	0	-0.78	0.583374	0.00862326	0.0318557	0	3.78641	4.92234	6.47079	5.69329	CHMP2B	chromatin modifying protein 2B	25978	600795, 609512	3
8081135	-2.03	0.245028	4.44e-06	7.14e-05	-1	-3.3	0.101807	3.8e-09	7.89e-08	-1	-1.27	0.415489	0.000904878	0.00433825	-1	2.39	5.2265	6.05e-08	7.94e-07	1	0.36	1.28064	0.243517	0.489562	0	-0.91	0.532092	0.00393495	0.0186784	0	4.8661	6.89508	8.1622	7.25195	CDV3	CDV3 homolog (mouse)	NA	NA
8082688	-1.16	0.446005	0.000256078	0.00111923	-1	-2.17	0.221734	1.11e-07	7.62e-07	-1	-1.01	0.497156	0.000951365	0.00449605	-1	1.86	3.6343	4.63e-08	6.62e-07	1	0.7	1.62092	0.00695654	0.0830152	0	-0.31	0.805849	0.179192	0.280126	0	3.98297	5.14784	6.15607	5.84465	DNAJC13	DnaJ (Hsp40) homolog, subfamily C, member 13	23317	NA	3
8082916	-1.41	0.377574	0.00941518	0.0183519	-1	-3.45	0.0917177	9.75e-07	3.94e-06	-1	-2.04	0.242913	0.000355386	0.00225332	-1	2.64	6.23759	2.97e-06	1.33e-05	1	1.24	2.35516	0.00911278	0.0945981	0	-0.81	0.572098	0.062351	0.128693	0	4.62881	6.03398	8.07547	7.2698	IL20RB	interleukin 20 receptor beta	53833	605621	3
8083429	-1.02	0.493696	0.000520662	0.00188956	-1	-2.12	0.229519	4.43e-08	3.95e-07	-1	-1.11	0.4649	0.000180003	0.00141589	-1	1.66	3.15609	1.06e-07	1.17e-06	1	0.64	1.55815	0.00795415	0.0888119	0	-0.47	0.724384	0.0358379	0.0861545	0	5.72444	6.74274	7.84775	7.38257	MBNL1	muscleblind-like (Drosophila)	4154	606516	3, 3
8083757	-1.25	0.421406	0.00117555	0.00353496	-1	-2.58	0.167071	2.57e-07	1.42e-06	-1	-1.33	0.396461	0.000552548	0.00308473	-1	1.87	3.66761	1.95e-06	9.58e-06	1	0.63	1.54555	0.0445037	0.208249	0	-0.71	0.612751	0.020197	0.0575981	0	4.66507	5.91179	7.24654	6.53991	NMD3	NMD3 homolog (S. cerevisiae)	51068	611021	3
8083854	-1.05	0.482959	7.07e-07	2.31e-05	-1	-2.35	0.196223	4.98e-12	1.7e-09	-1	-1.3	0.406293	4.32e-08	6.38e-06	-1	1.56	2.94049	8.2e-11	1.15e-08	1	0.51	1.42013	0.00113845	0.0364675	0	-0.79	0.57699	9.09e-06	0.000293051	0	4.36671	5.41674	6.71615	5.92277	PRKCI	protein kinase C, iota	5584	600539	3
8084146	-1.7	0.307649	2.93e-05	0.00023989	-1	-2.84	0.139661	3.16e-08	3.18e-07	-1	-1.14	0.453963	0.00177479	0.00696847	-1	2.4	5.26229	2.19e-08	3.95e-07	1	0.7	1.61894	0.02338	0.149666	0	-0.44	0.734938	0.117921	0.205124	0	4.9667	6.66734	7.8067	7.36239	FXR1	fragile X mental retardation, autosomal homolog 1	8087	600819	3
8084963	-1.71	0.305606	1.92e-05	0.000182477	-1	-2.85	0.139067	1.63e-08	2.05e-07	-1	-1.14	0.455055	0.00137295	0.00585553	-1	1.99	3.9697	2.69e-07	2.25e-06	1	0.28	1.21316	0.325178	0.571559	0	-0.86	0.552056	0.00362148	0.0176096	0	2.84699	4.55724	5.69313	4.83602	PAK2	p21 protein (Cdc42/Rac)-activated kinase 2	5062	605022	3
8084986	-1.08	0.472856	0.000921994	0.00292041	-1	-2.28	0.206385	1.23e-07	8.24e-07	-1	-1.2	0.436465	0.00029738	0.00197897	-1	1.31	2.47808	2.23e-05	6.61e-05	1	0.23	1.17178	0.365991	0.608001	0	-0.97	0.51144	0.000494256	0.00468442	0	4.44913	5.52966	6.72572	5.75836	FYTTD1	forty-two-three domain containing 1	84248	NA	3
8085554	-1.52	0.347607	0.000308444	0.0012854	-1	-2.56	0.169499	1.1e-06	4.31e-06	-1	-1.04	0.487617	0.00828201	0.0215395	-1	2.66	6.30245	2e-08	3.72e-07	1	1.13	2.19078	0.00156724	0.0409693	1	0.1	1.06826	0.758382	0.818268	0	5.53318	7.05764	8.09382	8.18909	---	---	NA	NA
8085815	-1.47	0.360675	7.2e-05	0.000445098	-1	-3.02	0.123006	5.09e-09	9.53e-08	-1	-1.55	0.341042	3.95e-05	0.000530554	-1	2.24	4.7313	2.28e-08	4.05e-07	1	0.77	1.70647	0.00838248	0.0910824	0	-0.78	0.581977	0.00657342	0.0264072	0	4.38992	5.86114	7.41312	6.63215	TOP2B	topoisomerase (DNA) II beta 180kDa	7155	126431	3
8086451	-1.52	0.348805	0.00220877	0.00571728	-1	-2.68	0.156038	8.44e-06	2.26e-05	-1	-1.16	0.447351	0.0139432	0.0318469	-1	1.35	2.54862	0.00197027	0.00319162	1	-0.17	0.88897	0.664622	0.825942	0	-1.33	0.397682	0.00162902	0.0104255	-1	4.16529	5.6848	6.84532	5.51501	HIGD1A	HIG1 domain family, member 1A	25994	NA	3, 3
8087380	-1.2	0.434322	1.77e-05	0.000172826	-1	-2.24	0.211567	1.71e-09	4.83e-08	-1	-1.04	0.487121	8.4e-05	0.000864134	-1	1.39	2.6172	3.3e-07	2.59e-06	1	0.18	1.13671	0.351973	0.596084	0	-0.85	0.553714	0.000123043	0.0018324	0	4.95912	6.16229	7.19993	6.34715	USP4	ubiquitin specific peptidase 4 (proto-oncogene)	7375	603486	3
8088718	-1	0.499931	0.000332859	0.00136228	-1	-2.63	0.162039	1.02e-09	3.56e-08	-1	-1.63	0.324123	7.78e-07	4.34e-05	-1	1.75	3.36403	1.82e-08	3.44e-07	1	0.75	1.68178	0.00148911	0.0405643	0	-0.88	0.545104	0.000316197	0.00352608	0	4.309	5.3092	6.93459	6.05919	UBA3	ubiquitin-like modifier activating enzyme 3	9039	603172	3
8089062	-1.97	0.254585	3.54e-06	6.14e-05	-1	-4.09	0.0586602	3.27e-11	4.64e-09	-1	-2.12	0.230415	1.02e-06	5.3e-05	-1	2.83	7.09085	6.84e-10	3.89e-08	1	0.85	1.80522	0.00609087	0.0779617	0	-1.27	0.415951	0.000105446	0.00164662	-1	3.9753	5.94909	8.06678	6.80126	CLDND1	claudin domain containing 1	56650	NA	3
8089527	-1.21	0.433032	8.2e-05	0.000487951	-1	-2.43	0.185731	5.44e-09	9.81e-08	-1	-1.22	0.428908	6.18e-05	0.000713978	-1	1.7	3.24917	9.42e-08	1.06e-06	1	0.49	1.407	0.035988	0.186863	0	-0.73	0.603472	0.00225848	0.0128952	0	5.38482	6.59228	7.81353	7.08489	ATG3	ATG3 autophagy related 3 homolog (S. cerevisiae)	64422	609606	3
8089801	-1.47	0.361648	5.21e-05	0.000358116	-1	-2.56	0.169513	4.22e-08	3.83e-07	-1	-1.09	0.468724	0.00112745	0.00508213	-1	1.78	3.43817	7.16e-07	4.56e-06	1	0.31	1.24341	0.239027	0.48547	0	-0.78	0.582815	0.00513298	0.0224727	0	5.10153	6.56887	7.66206	6.88317	GSK3B	glycogen synthase kinase 3 beta	2932	605004	3
8090091	-1.13	0.455381	0.0085535	0.0170028	-1	-2.38	0.192175	8.46e-06	2.27e-05	-1	-1.24	0.42201	0.00399371	0.0126171	-1	1.21	2.31175	0.00189048	0.00307603	1	0.07	1.05272	0.832104	0.919689	0	-1.17	0.44426	0.00177874	0.0110431	-1	4.46298	5.59784	6.84249	5.67197	PTPLB	protein tyrosine phosphatase-like (proline instead of catalytic arginine), member b	201562	NA	3
8090133	-1.2	0.436018	6.37e-06	8.74e-05	-1	-2.36	0.195127	3.91e-10	2.08e-08	-1	-1.16	0.447519	1.08e-05	0.000235054	-1	2.06	4.16168	8.65e-11	1.15e-08	1	0.86	1.81457	8.73e-05	0.010492	0	-0.3	0.812054	0.102291	0.185633	0	4.45722	5.65476	6.81474	6.51438	CCDC14	coiled-coil domain containing 14	64770	NA	3
8090772	-1.01	0.497001	0.000446525	0.00168425	-1	-2.14	0.226889	3.96e-08	3.69e-07	-1	-1.13	0.456516	0.0001234	0.00111083	-1	1.88	3.67791	1.14e-08	2.43e-07	1	0.87	1.82793	0.000537788	0.0258338	0	-0.26	0.834476	0.222508	0.329259	0	4.11967	5.12835	6.25961	5.99856	TOPBP1	topoisomerase (DNA) II binding protein 1	11073	607760	3
8091009	-1.04	0.487957	0.00422013	0.00956662	-1	-2.21	0.216792	1.82e-06	6.46e-06	-1	-1.17	0.444286	0.00142031	0.00599553	-1	1.64	3.1092	8.84e-06	3.14e-05	1	0.6	1.51716	0.0470852	0.213458	0	-0.57	0.674051	0.0497761	0.10921	0	3.02921	4.06438	5.23482	4.66575	PIK3CB	phosphoinositide-3-kinase, catalytic, beta polypeptide	5291	602925	3
8091048	-1.73	0.30157	1.27e-05	0.000137129	-1	-2.98	0.126456	5.28e-09	9.68e-08	-1	-1.25	0.419326	0.000451871	0.00268009	-1	2.14	4.39949	4.54e-08	6.54e-07	1	0.41	1.32675	0.144954	0.374699	0	-0.85	0.556342	0.00337973	0.0167546	0	4.76946	6.49889	7.75275	6.90679	COPB2	coatomer protein complex, subunit beta 2 (beta prime)	9276	606990	3
8091141	-1.52	0.349448	1.47e-06	3.58e-05	-1	-2.6	0.165304	1.05e-09	3.63e-08	-1	-1.08	0.473043	0.000152463	0.00127546	-1	2.27	4.81095	1.72e-10	1.62e-08	1	0.75	1.68118	0.00139935	0.0394689	0	-0.33	0.79527	0.119414	0.207225	0	5.01534	6.53219	7.61215	7.28166	XRN1	5'-3' exoribonuclease 1	54464	607994	3
8092201	-2.14	0.226688	4.17e-05	0.000306679	-1	-3.45	0.0917924	1.21e-07	8.13e-07	-1	-1.3	0.404929	0.0050606	0.0150034	-1	2.77	6.83163	1.58e-07	1.52e-06	1	0.63	1.54865	0.10247	0.313666	0	-0.67	0.627091	0.0735742	0.145248	0	3.5493	5.69052	6.99478	6.32153	TBL1XR1	transducin (beta)-like 1 X-linked receptor 1	79718	608628	3
8092726	-1.6	0.329975	0.000105961	0.000590049	-1	-3.77	0.0732934	4.68e-10	2.25e-08	-1	-2.17	0.222118	1.63e-06	7.02e-05	-1	1.91	3.75768	1.82e-06	9.1e-06	1	0.31	1.23994	0.310759	0.556169	0	-1.86	0.275413	1.51e-06	9.03e-05	-1	5.1507	6.75027	8.92088	7.06054	CLDN1	claudin 1	9076	603718, 607626	3
8092970	-1.09	0.469454	0.00254493	0.0063951	-1	-2.29	0.204897	6.62e-07	2.94e-06	-1	-1.2	0.436459	0.000950813	0.00449605	-1	1.44	2.7133	3.59e-05	9.77e-05	1	0.35	1.27377	0.228288	0.473424	0	-0.85	0.555947	0.00432988	0.0199873	0	7.60375	8.6947	9.89078	9.0438	APOD	apolipoprotein D	347	107740	3
8093112	-1.23	0.426257	0.00520624	0.0113585	-1	-2.47	0.180931	6.43e-06	1.79e-05	-1	-1.24	0.424465	0.00462804	0.0140447	-1	2.05	4.12683	5.97e-06	2.3e-05	1	0.81	1.75909	0.0289587	0.166254	0	-0.42	0.746673	0.220762	0.327251	0	3.68701	4.91722	6.1535	5.73205	UBXN7	UBX domain protein 7	26043	NA	3
8093191	-1.05	0.48321	0.00697767	0.0143748	-1	-2.44	0.184213	1.31e-06	4.95e-06	-1	-1.39	0.381228	0.000604672	0.00328611	-1	1.9	3.7348	3.3e-06	1.44e-05	1	0.85	1.80469	0.0118023	0.106913	0	-0.54	0.688	0.0826018	0.158463	0	4.97869	6.02796	7.41924	6.87972	DLG1	discs, large homolog 1 (Drosophila)	1739	601014	3
8094169	-1.35	0.392124	0.000281499	0.00120198	-1	-2.9	0.134158	1.85e-08	2.25e-07	-1	-1.55	0.342132	6.17e-05	0.000713978	-1	1.95	3.86371	3.18e-07	2.53e-06	1	0.6	1.51505	0.0400237	0.197079	0	-0.95	0.518348	0.00184423	0.0113446	0	4.13287	5.48349	7.03086	6.08285	CPEB2	cytoplasmic polyadenylation element binding protein 2	132864	610605	4
8094704	-1.76	0.295787	0.000100177	0.000566201	-1	-3.09	0.117336	7.98e-08	5.97e-07	-1	-1.33	0.396692	0.00149207	0.0061944	-1	2.1	4.28344	1.85e-06	9.18e-06	1	0.34	1.26699	0.308776	0.554864	0	-0.99	0.502603	0.00457368	0.0207841	0	5.24593	7.00329	8.3372	7.3447	UBE2K	ubiquitin-conjugating enzyme E2K (UBC1 homolog, yeast)	3093	602846	4
8094848	-1.69	0.309648	1.82e-05	0.000176724	-1	-2.83	0.140736	2.47e-08	2.67e-07	-1	-1.14	0.454504	0.00139895	0.00592482	-1	2.08	4.23539	1.15e-07	1.24e-06	1	0.39	1.31148	0.16669	0.401586	0	-0.75	0.596072	0.0104232	0.0360554	0	4.42704	6.11834	7.25597	6.50953	SLC30A9	solute carrier family 30 (zinc transporter), member 9	10463	604604	4
8095269	-1.12	0.459957	0.000429171	0.00163973	-1	-2.29	0.205122	7.93e-08	5.96e-07	-1	-1.17	0.445959	0.000281731	0.00191398	-1	1.84	3.58539	9.04e-08	1.03e-06	1	0.72	1.64913	0.00614099	0.0782411	0	-0.44	0.735443	0.0683008	0.137444	0	5.44497	6.5654	7.73042	7.28711	POLR2B	polymerase (RNA) II (DNA directed) polypeptide B, 140kDa	5431	180661	4
8095773	-1.87	0.273732	0.000230264	0.00103923	-1	-3.54	0.0856906	5.84e-08	4.82e-07	-1	-1.68	0.313046	0.000579786	0.00319701	-1	2.36	5.1407	2.1e-06	1.01e-05	1	0.49	1.40717	0.20148	0.441811	0	-1.18	0.44051	0.0029981	0.0156233	-1	4.78928	6.65845	8.334	7.15125	USO1	USO1 homolog, vesicle docking protein (yeast)	8615	603344	4
8096385	-1.16	0.446188	0.00022155	0.00100949	-1	-2.72	0.152183	1.19e-09	3.93e-08	-1	-1.55	0.341073	4.47e-06	0.000133611	-1	2.02	4.06092	6.23e-09	1.69e-07	1	0.86	1.81193	0.0011353	0.0364675	0	-0.69	0.618001	0.00400716	0.0189293	0	4.06868	5.23295	6.7848	6.09048	HERC3	hect domain and RLD 3	8916	605200	4
8096463	-1.85	0.277901	3.52e-06	6.13e-05	-1	-3.34	0.0987133	8.03e-10	3.11e-08	-1	-1.49	0.355211	6.12e-05	0.000710949	-1	2.78	6.87484	4.12e-10	2.88e-08	1	0.93	1.91052	0.00189587	0.0439745	0	-0.56	0.678638	0.0422135	0.096981	0	3.5221	5.36946	6.86271	6.30343	SMARCAD1	SWI/SNF-related, matrix-associated actin-dependent regulator of chromatin, subfamily a, containing DEAD/H box 1	56916	NA	4, 4
8096538	-1.22	0.428066	0.00176092	0.00478941	-1	-2.39	0.190251	1.32e-06	4.97e-06	-1	-1.17	0.444444	0.00236784	0.00850572	-1	1.83	3.56137	3.79e-06	1.61e-05	1	0.61	1.5245	0.056758	0.235008	0	-0.56	0.677555	0.0661907	0.134385	0	3.82693	5.05102	6.22095	5.65936	RAP1GDS1	RAP1, GTP-GDP dissociation stimulator 1	5910	179502	4
8097098	-1.34	0.396062	0.000141226	0.000728413	-1	-2.75	0.148245	1.5e-08	1.92e-07	-1	-1.42	0.374297	7.79e-05	0.000827855	-1	2.03	4.09145	6.16e-08	8.03e-07	1	0.7	1.62047	0.01256	0.110542	0	-0.72	0.606536	0.0089754	0.0327425	0	3.5649	4.9011	6.31884	5.59751	USP53	ubiquitin specific peptidase 53	54532	NA	4
8097148	-1.15	0.4513	0.000441592	0.00167257	-1	-2.29	0.204288	1.01e-07	7.08e-07	-1	-1.14	0.452666	0.000426778	0.00256945	-1	2.04	4.12383	2.42e-08	4.22e-07	1	0.9	1.86108	0.00135718	0.039243	0	-0.25	0.84245	0.305563	0.417357	0	4.45752	5.60536	6.74884	6.50151	KIAA1109	KIAA1109	84162	611565	4
8097470	-1.06	0.47804	0.00943147	0.0183736	-1	-2.07	0.237961	2.36e-05	5.44e-05	-1	-1.01	0.497784	0.0117573	0.0279269	-1	1.86	3.63951	7.43e-06	2.74e-05	1	0.8	1.73983	0.0230275	0.148679	0	-0.21	0.866062	0.509813	0.609245	0	4.4079	5.4727	6.47911	6.27165	---	---	NA	NA
8097513	-1.78	0.291292	0.000228012	0.00103162	-1	-2.98	0.126574	5.33e-07	2.47e-06	-1	-1.2	0.434528	0.00652335	0.0180546	-1	2.41	5.32692	9.79e-07	5.74e-06	1	0.63	1.55169	0.0909464	0.295697	0	-0.57	0.674251	0.111485	0.197511	0	6.60224	8.3817	9.58418	9.01554	MGST2	microsomal glutathione S-transferase 2	4258	601733	4
8097792	-1.51	0.351985	0.00695603	0.0143465	-1	-3.56	0.0848925	9.44e-07	3.85e-06	-1	-2.05	0.241182	0.000445905	0.00265185	-1	2.28	4.87103	3.04e-05	8.53e-05	1	0.78	1.71453	0.09333	0.299264	0	-1.27	0.413514	0.0063437	0.0257493	-1	3.89509	5.40151	7.45331	6.17932	SNORD73A	small nucleolar RNA, C/D box 73A	8944	603568	4
8098204	-1.05	0.482924	0.00322412	0.00774059	-1	-2.42	0.18623	3.16e-07	1.66e-06	-1	-1.37	0.385631	0.000242248	0.00172509	-1	1.43	2.69904	3.51e-05	9.6e-05	1	0.38	1.30343	0.185065	0.423666	0	-0.99	0.502643	0.00123997	0.00867744	0	4.16984	5.21998	6.59468	5.60229	CPE	carboxypeptidase E	1363	114855	4
8098291	-1.21	0.431166	6.34e-05	0.000405643	-1	-2.38	0.191481	8.13e-09	1.27e-07	-1	-1.17	0.4441	9.6e-05	0.000936386	-1	1.43	2.69921	1.13e-06	6.36e-06	1	0.22	1.16381	0.324562	0.57067	0	-0.95	0.516847	0.000171501	0.00231182	0	4.2691	5.48278	6.65383	5.70164	CLCN3	chloride channel 3	1182	600580	4
8099631	-1.48	0.359555	2.86e-05	0.000236701	-1	-2.55	0.171004	1.9e-08	2.29e-07	-1	-1.07	0.475599	0.000867083	0.00421436	-1	1.7	3.25485	5.55e-07	3.79e-06	1	0.23	1.1703	0.36861	0.610445	0	-0.85	0.556593	0.00174586	0.0109364	0	4.28067	5.75639	6.82857	5.98326	---	---	NA	NA
8099649	-1.3	0.40501	0.000328615	0.00135092	-1	-2.58	0.167678	6.39e-08	5.13e-07	-1	-1.27	0.41401	0.000372575	0.0023379	-1	2.02	4.05096	1.36e-07	1.38e-06	1	0.71	1.64068	0.014508	0.118792	0	-0.56	0.679258	0.0415932	0.0959954	0	5.57691	6.88088	8.15315	7.59518	DHX15	DEAH (Asp-Glu-Ala-His) box polypeptide 15	1665	603403	4
8099807	-1.34	0.395441	0.00366013	0.00855804	-1	-2.38	0.192182	1.58e-05	3.86e-05	-1	-1.04	0.485995	0.0176203	0.0379753	-1	1.24	2.36556	0.00217301	0.00348901	1	-0.1	0.935441	0.792499	0.89893	0	-1.14	0.454619	0.00327656	0.0165293	-1	4.48969	5.82815	6.86914	5.73187	GAFA3	FGF-2 activity-associated protein 3	100128236	NA
8099860	-1.1	0.465717	5.45e-05	0.000368311	-1	-2.17	0.222768	5.27e-09	9.68e-08	-1	-1.06	0.478333	7.63e-05	0.00081886	-1	1.43	2.69828	2.22e-07	1.94e-06	1	0.33	1.25664	0.105206	0.317505	0	-0.73	0.60109	0.00074528	0.00614842	0	4.44692	5.5494	6.61331	5.87896	RFC1	replication factor C (activator 1) 1, 145kDa	5981	102579	4
8100251	-1.28	0.412395	0.0011835	0.00355287	-1	-2.54	0.172299	6.36e-07	2.85e-06	-1	-1.26	0.417801	0.001314	0.00567943	-1	2.04	4.11377	8.4e-07	5.12e-06	1	0.76	1.6965	0.0194953	0.13719	0	-0.5	0.708799	0.104304	0.188517	0	3.8584	5.1363	6.39541	5.89886	FRYL	FRY-like	285527	NA	4
8101376	-1.39	0.382793	3.28e-07	1.56e-05	-1	-2.45	0.182997	5.3e-11	6.01e-09	-1	-1.06	0.478057	1.48e-05	0.000284979	-1	1.84	3.5902	2.39e-10	2.01e-08	1	0.46	1.3743	0.0131049	0.112795	0	-0.61	0.656994	0.00133869	0.00915148	0	5.72629	7.11166	8.17641	7.57036	SEC31A	SEC31 homolog A (S. cerevisiae)	22872	610257	4
8101659	-1.2	0.434705	0.00823194	0.0164727	-1	-2.33	0.199097	1.78e-05	4.28e-05	-1	-1.13	0.458005	0.0106952	0.026003	-1	2.57	5.95695	3.03e-07	2.44e-06	1	1.37	2.58952	0.00100275	0.034687	1	0.25	1.18601	0.478776	0.580533	0	6.82197	8.02386	9.15042	9.39654	SPARCL1	SPARC-like 1 (hevin)	8404	606041	4
8101971	-1.26	0.417847	9.07e-08	7.86e-06	-1	-2.28	0.20577	1.26e-11	2.8e-09	-1	-1.02	0.492453	2.96e-06	0.000103408	-1	1.64	3.11841	1.75e-10	1.63e-08	1	0.38	1.30302	0.0150826	0.120799	0	-0.64	0.641676	0.000189272	0.00247713	0	5.29075	6.5497	7.57164	6.93156	PPP3CA	protein phosphatase 3 (formerly 2B), catalytic subunit, alpha isoform	5530	114105	4
8102720	-1.01	0.495692	0.00528797	0.0114962	-1	-2.49	0.178509	2.52e-07	1.4e-06	-1	-1.47	0.360121	0.00013922	0.0011982	-1	1.97	3.91565	4.59e-07	3.31e-06	1	0.96	1.94096	0.00290153	0.0550588	0	-0.52	0.69898	0.0696719	0.139515	0	4.18339	5.19588	6.66932	6.15264	ANKRD50	ankyrin repeat domain 50	57182	NA	4
8103166	-1.75	0.296647	2.25e-07	1.28e-05	-1	-2.77	0.146397	1.36e-10	1.04e-08	-1	-1.02	0.493505	0.000242762	0.0017265	-1	2.24	4.7312	2.38e-10	2.01e-08	1	0.49	1.4035	0.0286742	0.165419	0	-0.53	0.692633	0.0135416	0.0434189	0	4.5751	6.32828	7.34715	6.81731	SH3D19	SH3 domain containing 19	152503	608674	4, 4
8104463	-1.17	0.445942	0.000276702	0.00118659	-1	-2.27	0.20684	9.07e-08	6.49e-07	-1	-1.11	0.463827	0.000471934	0.00276914	-1	1.83	3.54614	1.55e-07	1.51e-06	1	0.66	1.58137	0.0114834	0.105842	0	-0.45	0.733483	0.0681512	0.137256	0	5.20698	6.37205	7.4804	7.03323	2012-03-06	membrane-associated ring finger (C3HC4) 6	10299	NA	5
8104738	-1.6	0.330383	0.00168921	0.00464757	-1	-2.83	0.140791	5.11e-06	1.49e-05	-1	-1.23	0.426143	0.0108655	0.0263349	-1	1.92	3.77735	7.94e-05	0.000191827	1	0.32	1.24797	0.427785	0.660355	0	-0.91	0.531815	0.0250015	0.0670869	0	5.03048	6.62827	7.85886	6.94785	SUB1	SUB1 homolog (S. cerevisiae)	10923	600503	5
8105104	-1.17	0.44475	0.00029455	0.0012417	-1	-2.5	0.176665	2.27e-08	2.55e-07	-1	-1.33	0.397223	7.15e-05	0.000778627	-1	1.59	3.00237	1.19e-06	6.62e-06	1	0.42	1.33531	0.0965786	0.3049	0	-0.91	0.530414	0.000771887	0.00629157	0	3.61143	4.78036	6.11234	5.19753	C5orf51	chromosome 5 open reading frame 51	285636	NA	5
8105353	-1.33	0.399082	0.00100431	0.00312183	-1	-2.66	0.158489	2.72e-07	1.48e-06	-1	-1.33	0.397135	0.000808436	0.00400046	-1	2.02	4.05084	8.4e-07	5.12e-06	1	0.69	1.61662	0.0333111	0.179521	0	-0.64	0.642014	0.0385416	0.0905823	0	4.01532	5.34056	6.67286	6.03354	SKIV2L2	superkiller viralicidic activity 2-like 2 (S. cerevisiae)	23517	NA	5
8105463	-1.1	0.464903	0.00435956	0.00981553	-1	-2.47	0.180886	9.68e-07	3.92e-06	-1	-1.36	0.389082	0.000666256	0.00350915	-1	1.89	3.6973	2.98e-06	1.33e-05	1	0.78	1.71889	0.0180638	0.131287	0	-0.58	0.668788	0.0606077	0.126167	0	5.46346	6.56846	7.93031	7.34993	GPBP1	GC-rich promoter binding protein 1	65056	608412	5, 5
8105681	-1.74	0.30002	0.000185083	0.000881929	-1	-3.44	0.0923824	2.9e-08	3e-07	-1	-1.7	0.307921	0.000215432	0.00160087	-1	2.51	5.69355	2e-07	1.81e-06	1	0.77	1.70818	0.0336151	0.180475	0	-0.93	0.525984	0.00986115	0.0348391	0	4.53047	6.26734	7.9667	7.03979	ERBB2IP	erbb2 interacting protein	55914	606944	5
8105778	-1.53	0.346418	7.11e-06	9.4e-05	-1	-2.55	0.171049	5.38e-09	9.78e-08	-1	-1.02	0.493763	0.000720856	0.00369244	-1	1.97	3.90488	2.05e-08	3.79e-07	1	0.44	1.35272	0.0728931	0.266933	0	-0.58	0.667925	0.0153754	0.0477467	0	5.58091	7.11033	8.12843	7.54619	PIK3R1	phosphoinositide-3-kinase, regulatory subunit 1 (alpha)	5295	171833	5, 5, 5
8106534	-1.33	0.396903	3.39e-05	0.000265535	-1	-2.38	0.192621	1.47e-08	1.9e-07	-1	-1.04	0.48531	0.00049111	0.00284211	-1	1.88	3.69091	3e-08	4.91e-07	1	0.55	1.46493	0.0238853	0.151533	0	-0.49	0.710946	0.0345698	0.083922	0	4.496	5.82914	6.87216	6.37997	PAPD4	PAP associated domain containing 4	167153	NA	5
8106784	-1.54	0.344831	0.00125505	0.00370782	-1	-2.69	0.15529	3.84e-06	1.18e-05	-1	-1.15	0.450337	0.0105031	0.0256329	-1	2.5	5.63759	7.31e-07	4.62e-06	1	0.96	1.94402	0.0156978	0.122741	0	-0.19	0.875461	0.590849	0.683881	0	3.94578	5.48182	6.63275	6.44086	RASA1	RAS p21 protein activator (GTPase activating protein) 1	5921	139150, 608354, 608355	5, 5
8107066	-1.45	0.365605	0.000388913	0.00151861	-1	-2.8	0.143837	1.08e-07	7.44e-07	-1	-1.35	0.393422	0.000690355	0.00357813	-1	2.13	4.38052	2.96e-07	2.4e-06	1	0.68	1.60154	0.035114	0.184446	0	-0.67	0.630082	0.0305113	0.077213	0	4.18043	5.63207	6.97792	6.31153	LNPEP	leucyl/cystinyl aminopeptidase	4012	151300	5, 5
8107532	-1.66	0.317429	6.09e-06	8.52e-05	-1	-2.93	0.131486	2.34e-09	5.86e-08	-1	-1.27	0.414221	0.000169448	0.00135695	-1	1.82	3.5199	2.92e-07	2.38e-06	1	0.16	1.11732	0.526976	0.735481	0	-1.11	0.462818	0.000142934	0.00201945	-1	5.16387	6.81936	8.09089	6.97941	HSD17B4	hydroxysteroid (17-beta) dehydrogenase 4	3295	261515, 601860	5
8108424	-1.18	0.442762	0.000457265	0.00171647	-1	-2.27	0.206637	1.5e-07	9.55e-07	-1	-1.1	0.4667	0.000773982	0.00388091	-1	1.42	2.68299	9.6e-06	3.33e-05	1	0.25	1.18793	0.33376	0.579541	0	-0.85	0.554406	0.00182995	0.0112758	0	6.01172	7.18712	8.28655	7.43557	PAIP2	poly(A) binding protein interacting protein 2	51247	605604	5, 5
8109462	-1.23	0.425457	9.33e-06	0.00011304	-1	-2.23	0.212688	3.41e-09	7.31e-08	-1	-1	0.499905	0.000142894	0.00121365	-1	1.66	3.16998	1.36e-08	2.79e-07	1	0.43	1.34869	0.0337925	0.180954	0	-0.57	0.674216	0.00617827	0.0252493	0	3.84447	5.07739	6.07766	5.50895	CNOT8	CCR4-NOT transcription complex, subunit 8	9337	603731	5
8109697	-1.24	0.42478	2.28e-05	0.000205127	-1	-2.42	0.187331	3.24e-09	7.12e-08	-1	-1.18	0.441007	4.82e-05	0.000609028	-1	1.16	2.22843	1.22e-05	4.01e-05	1	-0.08	0.946593	0.702891	0.848526	0	-1.26	0.417454	2.87e-06	0.000130842	-1	3.56373	4.79894	5.98006	4.71975	CCNG1	cyclin G1	900	601578	5
8110055	-1.21	0.433163	0.000647582	0.00223022	-1	-2.38	0.192422	2.11e-07	1.22e-06	-1	-1.17	0.444225	0.000782318	0.00391016	-1	1.23	2.34346	9.76e-05	0.000228932	1	0.02	1.0151	0.935765	0.972349	0	-1.15	0.450934	0.00017326	0.00232953	-1	4.37596	5.58298	6.75362	5.6046	CPEB4	cytoplasmic polyadenylation element binding protein 4	80315	610607	5
8110666	-1.66	0.315732	0.000434154	0.00165414	-1	-2.74	0.149726	1.58e-06	5.78e-06	-1	-1.08	0.474217	0.0126257	0.029496	-1	2.42	5.36899	5.29e-07	3.68e-06	1	0.76	1.69516	0.0420302	0.202126	0	-0.31	0.803876	0.359623	0.47163	0	3.16087	4.8241	5.90048	5.58552	TRIM52	tripartite motif-containing 52	NA	NA
8111677	-1.59	0.331344	0.000738639	0.00246011	-1	-2.83	0.140686	1.18e-06	4.54e-06	-1	-1.24	0.424593	0.00545657	0.015859	-1	2.72	6.60919	1.32e-07	1.36e-06	1	1.13	2.18992	0.00462686	0.0672556	0	-0.1	0.929824	0.761989	0.820944	0	4.27734	5.87093	7.10678	7.00181	LIFR	leukemia inhibitory factor receptor alpha	3977	151443, 601559	5, 5
8111915	-1.5	0.352496	8.2e-05	0.000487951	-1	-2.76	0.14716	2.38e-08	2.63e-07	-1	-1.26	0.417479	0.000474859	0.00278023	-1	1.57	2.96088	1.03e-05	3.51e-05	1	0.06	1.0437	0.825095	0.915818	0	-1.2	0.435722	0.000150673	0.00210694	-1	4.5491	6.05342	7.31365	6.11513	SEPP1	selenoprotein P, plasma, 1	6414	601484	5
8112033	-1.25	0.420951	4.92e-06	7.59e-05	-1	-2.3	0.203444	1.2e-09	3.95e-08	-1	-1.05	0.483296	5.71e-05	0.000679959	-1	1.75	3.36596	1.42e-09	6.22e-08	1	0.5	1.4169	0.0112148	0.104331	0	-0.55	0.684784	0.00625657	0.0254429	0	3.42194	4.67022	5.71924	5.17296	ARL15	ADP-ribosylation factor-like 15	54622	NA	5
8112139	-2.35	0.195815	3.38e-09	1.15e-06	-1	-3.54	0.0858053	4.62e-12	1.63e-09	-1	-1.19	0.438196	8.3e-05	0.000857164	-1	3.06	8.33755	1.99e-12	1.63e-09	1	0.71	1.63262	0.00400358	0.062528	0	-0.48	0.715406	0.0323696	0.0801614	0	3.48768	5.84012	7.03047	6.54731	IL6ST	interleukin 6 signal transducer (gp130, oncostatin M receptor)	3572	600694	5
8112202	-1.11	0.464593	3.5e-06	6.13e-05	-1	-2.3	0.203542	2.72e-11	4.19e-09	-1	-1.19	0.438107	9.02e-07	4.81e-05	-1	1.42	2.66905	8.49e-09	2.04e-07	1	0.31	1.24002	0.063576	0.247577	0	-0.88	0.543262	6.96e-06	0.000246071	0	4.3181	5.42406	6.6147	5.73442	PLK2	polo-like kinase 2 (Drosophila)	10769	607023	5
8112302	-1	0.49909	0.00222726	0.00575831	-1	-2.1	0.233958	6.97e-07	3.06e-06	-1	-1.09	0.468769	0.000938634	0.00444357	-1	1.38	2.60754	1.58e-05	4.98e-05	1	0.38	1.3014	0.149322	0.379945	0	-0.71	0.610055	0.00781014	0.0296955	0	4.78874	5.79136	6.88441	6.17143	C5orf43	chromosome 5 open reading frame 43	643155	NA	5
8112478	-1.09	0.469024	0.000257591	0.0011236	-1	-2.54	0.172266	2.6e-09	6.19e-08	-1	-1.45	0.367287	7.3e-06	0.000183821	-1	1.9	3.73507	9.46e-09	2.17e-07	1	0.81	1.75183	0.00126947	0.0379141	0	-0.64	0.643426	0.00620221	0.0252877	0	4.08074	5.17301	6.61803	5.98187	NAIP	NLR family, apoptosis inhibitory protein	4671	600355	5, 5, 5, 5_h2_hap1, 5_h2_hap1, 5_h2_hap1
8112728	-1.83	0.281662	3.46e-05	0.000269498	-1	-3.07	0.119177	4.47e-08	3.97e-07	-1	-1.24	0.42312	0.00188729	0.00726405	-1	2.33	5.02286	1.61e-07	1.54e-06	1	0.5	1.41475	0.122185	0.343228	0	-0.74	0.598608	0.0220888	0.0614018	0	3.0412	4.86916	6.11003	5.36971	hCG_1757335	hCG1757335	643752	NA	12
8112857	-1.2	0.436277	0.000279262	0.00119429	-1	-2.23	0.213561	1.4e-07	9.07e-07	-1	-1.03	0.489509	0.00109439	0.00496817	-1	1.71	3.26463	3.47e-07	2.69e-06	1	0.51	1.42428	0.0471596	0.213458	0	-0.52	0.697198	0.0361566	0.0865968	0	4.19539	5.39207	6.42267	5.90231	MTX3	metaxin 3	345778	NA	5
8113023	-1.19	0.437296	3.78e-05	0.000285474	-1	-2.31	0.201178	5.77e-09	1.02e-07	-1	-1.12	0.460049	8.62e-05	0.000875376	-1	1.86	3.62053	6.99e-09	1.83e-07	1	0.66	1.58324	0.00383653	0.0620541	0	-0.46	0.728369	0.0328056	0.0808746	0	3.86328	5.0566	6.17674	5.71948	TMEM161B	transmembrane protein 161B	153396	NA	5
8113073	-1.02	0.493474	0.00676017	0.0140246	-1	-2.29	0.204585	2.99e-06	9.57e-06	-1	-1.27	0.414581	0.00118925	0.00528444	-1	1.41	2.66066	0.000129173	0.000291625	1	0.39	1.31297	0.207414	0.449226	0	-0.88	0.54433	0.00683286	0.0271107	0	5.09691	6.11587	7.38614	6.50869	ARRDC3	arrestin domain containing 3	57561	612464	5
8113157	-1.31	0.40411	2.23e-06	4.51e-05	-1	-2.82	0.141498	1.22e-11	2.8e-09	-1	-1.51	0.350147	2.29e-07	1.92e-05	-1	2	3.99599	1.21e-10	1.47e-08	1	0.69	1.61482	0.000905953	0.032537	0	-0.82	0.565423	0.000111438	0.00170846	0	3.87746	5.18464	6.69861	5.87601	TTC37	tetratricopeptide repeat domain 37	9652	NA	5
8113214	-1.54	0.34414	0.00118186	0.00354915	-1	-2.67	0.157157	1.48e-06	5.44e-06	-1	-1.13	0.456666	0.00906875	0.0229735	-1	1.39	2.62771	0.000468689	0.000888988	1	-0.15	0.904299	0.688111	0.839917	0	-1.28	0.412963	0.000761167	0.00623712	-1	3.15502	4.69395	5.82474	4.54883	GLRX	glutaredoxin (thioltransferase)	2745	600443	5
8113469	-1.9	0.267791	5.52e-06	8.1e-05	-1	-3	0.12501	6.98e-09	1.16e-07	-1	-1.1	0.466819	0.00195877	0.00745261	-1	2.54	5.79948	4.6e-09	1.37e-07	1	0.64	1.55305	0.0331834	0.179302	0	-0.46	0.724993	0.0930722	0.172787	0	4.92513	6.82595	7.92501	7.46105	PJA2	praja ring finger 2	9867	NA	5
8113591	-1.22	0.429159	6.93e-06	9.22e-05	-1	-2.36	0.194708	1.03e-09	3.6e-08	-1	-1.14	0.453697	2.37e-05	0.000380837	-1	1.58	2.99687	8.9e-09	2.1e-07	1	0.36	1.28613	0.0586529	0.238789	0	-0.78	0.583515	0.000341791	0.00366676	0	3.74962	4.97004	6.11024	5.33308	PGGT1B	protein geranylgeranyltransferase type I, beta subunit	5229	602031	5
8113724	-1.57	0.336623	0.00142753	0.00407851	-1	-2.83	0.140484	2.42e-06	8.1e-06	-1	-1.26	0.417333	0.00689635	0.0188838	-1	2.41	5.31693	1.5e-06	7.86e-06	1	0.84	1.7898	0.0364702	0.188223	0	-0.42	0.746943	0.252579	0.361521	0	4.13842	5.70921	6.96994	6.54901	---	---	NA	NA
8114158	-1.03	0.489537	0.000730376	0.00243629	-1	-2.39	0.190279	1.33e-08	1.79e-07	-1	-1.36	0.388693	2.64e-05	0.000403771	-1	1.36	2.57055	4.2e-06	1.74e-05	1	0.33	1.25838	0.162784	0.396812	0	-1.03	0.489123	0.000101674	0.00161186	-1	5.27254	6.30305	7.66635	6.63462	PPP2CA	protein phosphatase 2 (formerly 2A), catalytic subunit, alpha isoform	5515	176915	5
8114468	-1.02	0.493233	0.0001909	0.000901395	-1	-2.15	0.225901	8.04e-09	1.26e-07	-1	-1.13	0.458001	4.99e-05	0.000623649	-1	1.46	2.75812	2.39e-07	2.05e-06	1	0.44	1.3604	0.0377177	0.190811	0	-0.68	0.623064	0.00169877	0.0107468	0	2.43658	3.45624	4.58281	3.90026	SNORD63	small nucleolar RNA, C/D box 63	26785	NA	5
8114829	-1	0.499488	0.00436919	0.00983314	-1	-2.59	0.165728	9.2e-08	6.55e-07	-1	-1.59	0.331796	4.04e-05	0.000538235	-1	1.52	2.86523	1.54e-05	4.86e-05	1	0.52	1.43115	0.0756856	0.271519	0	-1.07	0.47485	0.000541072	0.00499954	-1	4.8013	5.80277	7.3944	6.31995	YIPF5	Yip1 domain family, member 5	81555	611483	5
8114861	-2.3	0.203678	9.67e-08	7.96e-06	-1	-3.43	0.0928388	2.17e-10	1.45e-08	-1	-1.13	0.455811	0.000826145	0.00406021	-1	2.95	7.73592	1.34e-10	1.51e-08	1	0.66	1.57564	0.0202151	0.139056	0	-0.48	0.718194	0.0700346	0.140185	0	4.00237	6.29801	7.4315	6.95395	LARS	leucyl-tRNA synthetase	51520	151350	5
8115074	-2.15	0.224702	0.0001689	0.000829284	-1	-3.92	0.0659884	3.07e-08	3.12e-07	-1	-1.77	0.29367	0.000801784	0.00397474	-1	3.43	10.7827	9.5e-09	2.18e-07	1	1.28	2.42291	0.00500898	0.0699846	0	-0.49	0.711536	0.204498	0.309222	0	3.1418	5.29571	7.06344	6.57245	---	---	NA	NA
8117368	-1.71	0.3059	0.00196998	0.00522793	-1	-3.33	0.0991533	1.03e-06	4.09e-06	-1	-1.63	0.324136	0.00237603	0.00853231	-1	1.59	3.01776	0.000799514	0.00142523	1	-0.12	0.923133	0.787671	0.896691	0	-1.74	0.299221	0.000237754	0.00290083	-1	4.78127	6.49014	8.11546	6.37475	HIST1H4C	histone cluster 1, H4c	8364	602827	6
8119080	-1.11	0.462449	0.00166429	0.00459752	-1	-2.35	0.195648	3.2e-07	1.67e-06	-1	-1.24	0.423068	0.000531133	0.00300565	-1	1.62	3.07927	4.76e-06	1.93e-05	1	0.51	1.42401	0.0750222	0.270486	0	-0.73	0.602452	0.010309	0.0357792	0	6.55902	7.67165	8.91269	8.1816	SFRS3	splicing factor, arginine/serine-rich 3	6428	603364	6
8120102	-1.07	0.475319	0.0055639	0.0119675	-1	-2.09	0.234951	1.5e-05	3.68e-05	-1	-1.02	0.494303	0.00824386	0.0214677	-1	1.69	3.23599	2.26e-05	6.71e-05	1	0.62	1.53813	0.0586236	0.238789	0	-0.4	0.760301	0.20503	0.309812	0	5.77054	6.84357	7.86011	7.46475	CD2AP	CD2-associated protein	23607	604241, 607832	6
8120441	-1.47	0.360871	3.44e-06	6.08e-05	-1	-2.48	0.179186	1.6e-09	4.66e-08	-1	-1.01	0.496536	0.00030768	0.0020334	-1	2.15	4.44016	8.02e-10	4.37e-08	1	0.68	1.60233	0.00392116	0.0624499	0	-0.33	0.795612	0.116398	0.203283	0	4.97827	6.44871	7.45874	7.12888	PHF3	PHD finger protein 3	23469	607789	6
8120758	-1.41	0.376008	7.35e-05	0.000449949	-1	-2.48	0.179523	6.02e-08	4.9e-07	-1	-1.07	0.477445	0.00127359	0.00556419	-1	2.26	4.77547	1.07e-08	2.34e-07	1	0.84	1.79561	0.00326581	0.0573932	0	-0.22	0.857306	0.378864	0.489233	0	4.41582	5.82698	6.89358	6.67146	SENP6	SUMO1/sentrin specific peptidase 6	26054	605003	6
8120783	-1.02	0.492621	7.92e-05	0.000474849	-1	-2.23	0.212748	2.01e-09	5.38e-08	-1	-1.21	0.431869	9.77e-06	0.000221074	-1	1.46	2.75877	7.24e-08	9.08e-07	1	0.44	1.35903	0.0266636	0.159355	0	-0.77	0.586923	0.000354455	0.0037363	0	4.5798	5.60125	6.81259	6.04383	MYO6	myosin VI	4646	600970, 606346, 607821	6
8121002	-1.48	0.358285	7.79e-05	0.000468769	-1	-3.14	0.113735	1.54e-09	4.55e-08	-1	-1.66	0.317441	1.5e-05	0.000287727	-1	1.97	3.91039	2.23e-07	1.95e-06	1	0.49	1.40103	0.0844946	0.286391	0	-1.17	0.444746	0.000142845	0.00201945	-1	3.55429	5.03511	6.69055	5.5216	C6orf162	chromosome 6 open reading frame 162	57150	NA	6
8121161	-1.14	0.455167	0.000322082	0.00132981	-1	-2.61	0.163689	8.7e-09	1.33e-07	-1	-1.48	0.359624	1.64e-05	0.000306548	-1	1.71	3.26107	2.46e-07	2.1e-06	1	0.57	1.48433	0.0238128	0.151254	0	-0.91	0.533801	0.000729635	0.00607149	0	4.36007	5.49561	6.97105	6.06542	KIAA0776	KIAA0776	23376	NA	6
8121277	-1.14	0.45397	0.000806822	0.0026358	-1	-2.3	0.202806	1.11e-07	7.62e-07	-1	-1.16	0.446739	0.000489771	0.00284166	-1	1.35	2.5483	1.38e-05	4.45e-05	1	0.21	1.15685	0.416688	0.651246	0	-0.95	0.51681	0.000588174	0.0052469	0	4.59283	5.73216	6.89466	5.94236	AIM1	absent in melanoma 1	202	601797	6
8121734	-1.06	0.478425	0.0230148	0.0385911	-1	-3.12	0.11467	7.88e-07	3.35e-06	-1	-2.06	0.239682	8.69e-05	0.000878182	-1	1.82	3.53518	8.72e-05	0.0002078	1	0.76	1.69132	0.0602673	0.242378	0	-1.3	0.405379	0.0017799	0.0110431	-1	4.56585	5.62949	7.6903	6.38764	ASF1A	ASF1 anti-silencing function 1 homolog A (S. cerevisiae)	25842	609189	6
8122672	-1.17	0.4457	3.84e-05	0.000288798	-1	-2.19	0.218989	6.95e-09	1.16e-07	-1	-1.03	0.491338	0.000159415	0.00130823	-1	1.57	2.96703	6.98e-08	8.82e-07	1	0.4	1.3224	0.056141	0.233338	0	-0.62	0.649747	0.0038427	0.0183588	0	4.65003	5.81588	6.8411	6.21905	MAP3K7IP2	mitogen-activated protein kinase kinase kinase 7 interacting protein 2	23118	605101	6
8122705	-1.39	0.380959	0.00203967	0.00536115	-1	-2.53	0.173073	2.57e-06	8.47e-06	-1	-1.14	0.454309	0.00726198	0.0195423	-1	1.7	3.25481	3.8e-05	0.000102055	1	0.31	1.23995	0.378196	0.619694	0	-0.83	0.56332	0.0171538	0.0513862	0	4.77641	6.1687	7.30695	6.47898	PCMT1	protein-L-isoaspartate (D-aspartate) O-methyltransferase	5110	176851	6
8123467	-1.06	0.481009	2.52e-05	0.000217865	-1	-2.3	0.203302	2.76e-10	1.69e-08	-1	-1.24	0.422657	2.54e-06	9.31e-05	-1	2.03	4.0818	4.07e-11	7.54e-09	1	0.97	1.96338	1.23e-05	0.00409736	0	-0.27	0.829837	0.123989	0.212934	0	3.9415	4.99736	6.23981	5.97071	C6orf70	chromosome 6 open reading frame 70	55780	NA	6
8123767	-1.61	0.328124	8.08e-05	0.000482226	-1	-3	0.124904	2.44e-08	2.66e-07	-1	-1.39	0.380661	0.000368627	0.00231978	-1	1.95	3.85806	9.81e-07	5.75e-06	1	0.34	1.26592	0.258527	0.506934	0	-1.05	0.481888	0.00119394	0.00844723	-1	5.13641	6.7441	8.13752	7.08429	SSR1	signal sequence receptor, alpha	6745	600868	6
8123985	-1.44	0.369748	3.8e-05	0.000286237	-1	-2.73	0.150278	2.51e-10	1.63e-08	-1	-1.3	0.406434	4.42e-05	0.000569423	-1	1.97	3.92879	2.27e-09	8.75e-08	1	0.54	1.45266	0.0319362	0.175064	0	-0.76	0.590411	0.000972608	0.00734732	0	5.84346	7.27885	8.57775	7.81754	NOL7	nucleolar protein 7, 27kDa	NA	NA
8123989	-1.38	0.385093	7.7e-05	0.000465279	-1	-2.91	0.132862	2.17e-09	5.58e-08	-1	-1.54	0.345013	1.75e-05	0.000317801	-1	1.93	3.81963	9.48e-08	1.07e-06	1	0.56	1.47091	0.0367756	0.188865	0	-0.98	0.507483	0.000502435	0.00474686	0	5.17297	6.54969	8.08497	7.1064	RANBP9	RAN binding protein 9	10048	603854	6
8124273	-1.99	0.252033	4.05e-07	1.72e-05	-1	-3.13	0.113985	5.46e-10	2.49e-08	-1	-1.14	0.452264	0.000476621	0.00278606	-1	2.37	5.16137	2.11e-09	8.26e-08	1	0.38	1.30084	0.13827	0.366055	0	-0.77	0.588321	0.004083	0.0191715	0	4.57953	6.56785	7.71261	6.94728	C6orf62	chromosome 6 open reading frame 62	81688	NA	6
8127234	-1.62	0.325567	1.32e-06	3.35e-05	-1	-2.73	0.150271	4.62e-10	2.23e-08	-1	-1.12	0.461569	0.000145822	0.00123183	-1	2.85	7.19623	8.68e-12	2.96e-09	1	1.23	2.34285	1.18e-05	0.00409736	1	0.11	1.08139	0.594067	0.685862	0	5.46823	7.08721	8.20259	8.31547	DST	dystonin	667	113810	6, 6, 6, 6, 6, 6, 6
8127698	-1.07	0.475922	7.35e-05	0.000450095	-1	-2.11	0.232023	9.37e-09	1.4e-07	-1	-1.04	0.487524	0.000105277	0.000995483	-1	1.81	3.518	3.62e-09	1.17e-07	1	0.74	1.67429	0.000907856	0.032537	0	-0.29	0.816258	0.134065	0.225686	0	4.37543	5.44663	6.48309	6.19018	PHIP	pleckstrin homology domain interacting protein	55023	NA	6
8128013	-1.22	0.42902	4.35e-05	0.000315522	-1	-2.49	0.17822	1.62e-09	4.69e-08	-1	-1.27	0.415411	2.3e-05	0.000376662	-1	1.82	3.52082	1.07e-08	2.34e-07	1	0.6	1.5105	0.00967076	0.0979951	0	-0.67	0.62748	0.0029425	0.0154414	0	4.7103	5.93118	7.19857	6.52621	RARS2	arginyl-tRNA synthetase 2, mitochondrial	57038	611523, 611524	6
8128429	-1.51	0.351341	1.2e-05	0.000132714	-1	-2.81	0.142988	1.8e-09	4.98e-08	-1	-1.3	0.406977	7.56e-05	0.000813438	-1	1.98	3.94999	1.82e-08	3.44e-07	1	0.47	1.38779	0.0570187	0.235552	0	-0.82	0.564799	0.00151516	0.00993531	0	4.00198	5.51104	6.80802	5.98383	CCNC	cyclin C	892	123838	6
8128650	-1.67	0.31418	1.97e-05	0.000185572	-1	-3	0.124711	3.93e-09	8.05e-08	-1	-1.33	0.396942	0.000224459	0.00164558	-1	1.98	3.93645	1.77e-07	1.66e-06	1	0.31	1.23675	0.26863	0.516245	0	-1.03	0.49092	0.000584683	0.00523269	-1	5.45548	7.12582	8.45882	7.43238	SEC63	SEC63 homolog (S. cerevisiae)	11231	174050, 608648	6
8128716	-2.25	0.210409	3.22e-08	4.3e-06	-1	-3.36	0.097428	5.33e-11	6.01e-09	-1	-1.11	0.463041	0.000413776	0.00251277	-1	2.3	4.92426	1.17e-09	5.59e-08	1	0.05	1.03611	0.83077	0.919049	0	-1.06	0.479761	0.000111358	0.00170846	-1	3.74397	5.9927	7.10349	6.04388	CD164	CD164 molecule, sialomucin	8763	603356	6
8129317	-1.52	0.348646	9.55e-07	2.79e-05	-1	-3.09	0.117053	1.11e-11	2.8e-09	-1	-1.57	0.335736	5.1e-07	3.2e-05	-1	2.19	4.54867	1.23e-10	1.47e-08	1	0.67	1.58587	0.00282219	0.054484	0	-0.91	0.532435	9.69e-05	0.00156447	0	4.68768	6.20784	7.78245	6.87312	SERINC1	serine incorporator 1	57515	NA	6
8129590	-1.4	0.378524	1.72e-05	0.000169007	-1	-2.5	0.17648	7.15e-09	1.17e-07	-1	-1.1	0.466233	0.00029691	0.00197777	-1	1.97	3.92061	1.21e-08	2.56e-07	1	0.57	1.48404	0.0194746	0.13719	0	-0.53	0.69191	0.0243775	0.0658927	0	5.3693	6.77084	7.87172	7.34038	STX7	syntaxin 7	8417	603217	6
8129706	-1.45	0.366711	1.08e-05	0.000124729	-1	-2.96	0.128362	2.43e-10	1.59e-08	-1	-1.51	0.350035	5.2e-06	0.000146892	-1	1.99	3.97331	5.68e-09	1.58e-07	1	0.54	1.45706	0.0234524	0.14983	0	-0.97	0.510021	0.00017152	0.00231182	0	3.52859	4.97588	6.49031	5.51894	HBS1L	HBS1-like (S. cerevisiae)	10767	612450	6, 6, 6
8130499	-2.07	0.23896	4.63e-07	1.81e-05	-1	-3.18	0.110252	5.07e-10	2.37e-08	-1	-1.12	0.461383	0.00079379	0.00394764	-1	2.36	5.13919	7.26e-09	1.86e-07	1	0.3	1.22806	0.267133	0.514641	0	-0.82	0.566608	0.00293508	0.0154099	0	4.50122	6.56638	7.68234	6.86276	DYNLT1	dynein, light chain, Tctex-type 1	6993	601554	6
8130765	-1.42	0.373652	0.000438527	0.00166442	-1	-2.86	0.137915	5.75e-08	4.76e-07	-1	-1.44	0.369102	0.000310175	0.00204495	-1	1.69	3.22775	9.05e-06	3.19e-05	1	0.27	1.20605	0.378441	0.619735	0	-1.17	0.445157	0.000467855	0.00451778	-1	4.92532	6.34555	7.78346	6.61585	FAM103A1	family with sequence similarity 103, member A1	83640	NA	15
8131263	-1.33	0.39859	0.0177039	0.0309881	-1	-3.02	0.122942	6.94e-06	1.91e-05	-1	-1.7	0.308443	0.00246582	0.00876047	-1	2.75	6.74541	2.13e-06	1.02e-05	1	1.43	2.68866	0.00434324	0.0657561	0	-0.27	0.829298	0.52097	0.619261	0	4.03189	5.35891	7.05583	6.78579	RNU13P2	RNA, U13 small nuclear pseudogene 2	6077	NA
8131614	-1.56	0.338541	0.000366782	0.00145805	-1	-2.62	0.162812	7.73e-07	3.31e-06	-1	-1.06	0.480921	0.00820138	0.0214164	-1	2.19	4.5612	6.1e-07	4.05e-06	1	0.63	1.54416	0.0663488	0.253587	0	-0.43	0.742617	0.175626	0.275869	0	4.95656	6.51915	7.57528	7.14597	AHR	aryl hydrocarbon receptor	196	600253	7
8131844	-1.09	0.470725	0.00177333	0.00481716	-1	-2.75	0.149145	1.03e-08	1.5e-07	-1	-1.66	0.316841	1.21e-05	0.000249689	-1	1.78	3.42461	5.73e-07	3.86e-06	1	0.69	1.61205	0.0164687	0.125853	0	-0.97	0.510765	0.000728242	0.00606739	0	6.29201	7.37906	9.03722	8.06796	GPNMB	glycoprotein (transmembrane) nmb	10457	604368	7
8131975	-1.49	0.354852	2.68e-05	0.000225689	-1	-2.75	0.148298	7.1e-09	1.17e-07	-1	-1.26	0.417915	0.000199321	0.00151304	-1	1.89	3.71381	1.95e-07	1.78e-06	1	0.4	1.31785	0.128244	0.353552	0	-0.86	0.55075	0.00186597	0.0114461	0	5.48168	6.97639	8.23511	7.37458	TAX1BP1	Tax1 (human T-cell leukemia virus type I) binding protein 1	8887	605326	7
8133062	-1.34	0.395305	0.00138309	0.00398486	-1	-2.68	0.156554	8.52e-07	3.56e-06	-1	-1.34	0.396035	0.00142716	0.00601398	-1	2.13	4.37622	1.07e-06	6.15e-06	1	0.79	1.72994	0.0224579	0.146822	0	-0.55	0.685117	0.0963217	0.177296	0	4.45246	5.79142	7.12772	6.58215	ZNF273	zinc finger protein 273	10793	604756	7
8133860	-1.1	0.468117	0.00749502	0.0152453	-1	-2.31	0.201951	6.72e-06	1.86e-05	-1	-1.21	0.431411	0.00329223	0.010898	-1	1.69	3.22905	3.24e-05	8.97e-05	1	0.6	1.51157	0.0821636	0.281722	0	-0.62	0.65211	0.0621931	0.128489	0	4.95386	6.04892	7.26179	6.64498	GNAI1	guanine nucleotide binding protein (G protein), alpha inhibiting activity polypeptide 1	2770	139310	7
8135235	-1.6	0.329414	2.39e-05	0.000211653	-1	-3.16	0.112028	1.55e-09	4.55e-08	-1	-1.56	0.340082	3.18e-05	0.000458572	-1	2.18	4.53039	3.82e-08	5.81e-07	1	0.58	1.49237	0.0407965	0.198729	0	-0.98	0.50753	0.000923181	0.0071722	0	4.08827	5.6903	7.24634	6.26791	PMPCB	peptidase (mitochondrial processing) beta	9512	603131	7
8135250	-1.4	0.379996	4.06e-05	0.000301859	-1	-2.41	0.188118	3.31e-08	3.24e-07	-1	-1.01	0.495052	0.00114778	0.00514829	-1	1.51	2.85659	2.22e-06	1.06e-05	1	0.12	1.08549	0.627815	0.803683	0	-0.9	0.537375	0.000837045	0.00665919	0	5.52475	6.92069	7.93504	7.03904	PSMC2	proteasome (prosome, macropain) 26S subunit, ATPase, 2	5701	154365	7
8135392	-1.17	0.444673	0.00133566	0.00389223	-1	-2.56	0.169263	1.32e-07	8.65e-07	-1	-1.39	0.380645	0.000212382	0.00158036	-1	1.95	3.86738	4.9e-07	3.47e-06	1	0.78	1.71972	0.0106324	0.102171	0	-0.61	0.654603	0.0329359	0.0811087	0	4.26	5.42919	6.82267	6.21136	HBP1	HMG-box transcription factor 1	26959	NA	7
8135688	-1.33	0.397595	0.00066038	0.0022565	-1	-2.68	0.156266	1.29e-07	8.49e-07	-1	-1.35	0.393029	0.000493503	0.00284819	-1	1.97	3.92358	7.17e-07	4.56e-06	1	0.64	1.56	0.0399328	0.197068	0	-0.71	0.613124	0.0193655	0.0557797	0	3.60986	4.94049	6.28778	5.58203	LSM8	LSM8 homolog, U6 small nuclear RNA associated (S. cerevisiae)	51691	607288	7
8135955	-1.28	0.412446	0.00297121	0.0072367	-1	-2.28	0.205695	1.31e-05	3.3e-05	-1	-1	0.49872	0.0150849	0.0338102	-1	1.72	3.29403	3.52e-05	9.62e-05	1	0.44	1.35861	0.202007	0.442513	0	-0.56	0.677566	0.0979858	0.179411	0	4.32432	5.60204	6.60574	6.04417	CALU	calumenin	813	603420	7
8136177	-1.64	0.320257	5.58e-06	8.15e-05	-1	-2.65	0.159803	3.98e-09	8.08e-08	-1	-1	0.498984	0.00115821	0.00518444	-1	1.9	3.72435	4.58e-08	6.57e-07	1	0.25	1.19275	0.302521	0.549244	0	-0.75	0.595162	0.00313289	0.0160523	0	4.40036	6.04306	7.046	6.29735	KLHDC10	kelch domain containing 10	23008	NA	7
8138108	-1.44	0.369346	1.44e-05	0.000149634	-1	-2.94	0.130283	3.68e-10	1.99e-08	-1	-1.5	0.35274	7.06e-06	0.00017971	-1	1.66	3.15794	2.02e-07	1.82e-06	1	0.22	1.16637	0.339584	0.585949	0	-1.28	0.411426	6.89e-06	0.000245974	-1	4.32713	5.76408	7.26741	5.98611	KDELR2	KDEL (Lys-Asp-Glu-Leu) endoplasmic reticulum protein retention receptor 2	11014	609024	7
8139232	-1.3	0.406127	0.0178455	0.0311761	-1	-3.09	0.117233	7.72e-06	2.1e-05	-1	-1.79	0.288661	0.00164693	0.00661372	-1	1.64	3.11834	0.00124642	0.00211497	1	0.34	1.26644	0.453475	0.682115	0	-1.45	0.365572	0.00249741	0.0138547	-1	4.49289	5.79288	7.58544	6.13366	PSMA2	proteasome (prosome, macropain) subunit, alpha type, 2	5683	176842	7
8139706	-3.33	0.0992345	2.13e-08	3.65e-06	-1	-4.89	0.0337467	3.72e-11	4.96e-09	-1	-1.56	0.34007	0.000533082	0.00301004	-1	3.81	14.064	1.99e-10	1.79e-08	1	0.48	1.39564	0.179726	0.4185	0	-1.08	0.474615	0.00337284	0.016728	-1	5.12207	8.45509	10.0112	8.93601	SEC61G	Sec61 gamma subunit	23480	609215	7
8140500	-2.09	0.234121	0.000192213	0.000906031	-1	-3.26	0.104233	1.28e-06	4.86e-06	-1	-1.17	0.445211	0.0196415	0.0414322	-1	2.27	4.82668	1.41e-05	4.52e-05	1	0.18	1.13003	0.673181	0.831192	0	-0.99	0.5031	0.0200554	0.0573367	0	4.39162	6.48629	7.65373	6.66265	TMEM60	transmembrane protein 60	85025	NA	7
8140828	-1.66	0.315652	3.1e-06	5.65e-05	-1	-3.48	0.0896715	2.47e-11	4.01e-09	-1	-1.82	0.284084	7.03e-07	4.09e-05	-1	2.25	4.75839	2.83e-09	9.85e-08	1	0.59	1.50199	0.0214492	0.142357	0	-1.23	0.426691	1.88e-05	0.000501142	-1	4.39611	6.0597	7.87531	6.64658	SRI	sorcin	6717	182520	7, 7
8142143	-1.05	0.482098	0.000144413	0.000739457	-1	-2.15	0.224551	7.27e-09	1.18e-07	-1	-1.1	0.46578	6.65e-05	0.000746816	-1	1.74	3.33202	9.02e-09	2.12e-07	1	0.68	1.60636	0.0024531	0.0508058	0	-0.42	0.748209	0.0381223	0.0898868	0	4.59924	5.65184	6.75412	6.33564	COG5	component of oligomeric golgi complex 5	10466	606821	7
8142540	-1.24	0.422712	0.00380367	0.00881262	-1	-2.54	0.172033	1.71e-06	6.13e-06	-1	-1.3	0.406975	0.0021513	0.00797025	-1	1.77	3.41402	1.72e-05	5.35e-05	1	0.53	1.44315	0.127428	0.351658	0	-0.77	0.587326	0.0227871	0.0626632	0	5.438	6.68026	7.97724	7.20948	FAM3C	family with sequence similarity 3, member C	10447	608618	7
8142878	-1.81	0.285205	2.33e-05	0.000207754	-1	-3.31	0.10094	5.5e-09	9.85e-08	-1	-1.5	0.353922	0.000198317	0.00150971	-1	2.08	4.214	6.59e-07	4.29e-06	1	0.27	1.20185	0.386976	0.627975	0	-1.23	0.425362	0.000306766	0.00347848	-1	5.32627	7.1362	8.6347	7.40146	CDC26	cell division cycle 26 homolog (S. cerevisiae)	246184	NA	9
8143341	-1.21	0.433342	0.00273843	0.00677251	-1	-2.21	0.21632	7.22e-06	1.98e-05	-1	-1	0.49919	0.00971822	0.0241432	-1	1.5	2.83802	8.08e-05	0.000195001	1	0.3	1.22983	0.352932	0.596859	0	-0.7	0.613921	0.0292357	0.0750995	0	4.07039	5.27681	6.27915	5.57528	JHDM1D	jumonji C domain containing histone demethylase 1 homolog D (S. cerevisiae)	80853	NA	7
8143597	-1.33	0.397114	0.00105235	0.00324036	-1	-2.6	0.164484	4.21e-07	2.07e-06	-1	-1.27	0.4142	0.0013433	0.00577638	-1	1.94	3.82629	2.36e-06	1.11e-05	1	0.6	1.51947	0.0645787	0.25019	0	-0.67	0.629364	0.0332678	0.0815907	0	3.78174	5.11412	6.38572	5.71769	FAM115A	family with sequence similarity 115, member A	NA	NA
8143988	-1.3	0.406703	0.0001222	0.000652418	-1	-2.38	0.19262	4.28e-08	3.86e-07	-1	-1.08	0.473614	0.000708743	0.00364406	-1	2	4.00821	3.06e-08	4.96e-07	1	0.71	1.63015	0.0086226	0.092266	0	-0.37	0.772062	0.122897	0.211524	0	5.12345	6.4214	7.49962	7.12641	MLL3	myeloid/lymphoid or mixed-lineage leukemia 3	58508	606833	7
8144701	-1.22	0.430767	0.0201813	0.0345988	-1	-2.52	0.174345	6.26e-05	0.000125818	-1	-1.3	0.404731	0.0123545	0.0290111	-1	2.01	4.01393	7.72e-05	0.000187403	1	0.79	1.72907	0.0754726	0.271217	0	-0.51	0.699809	0.217658	0.323718	0	4.39579	5.61081	6.91577	6.4008	LOC100131581	hypothetical LOC100131581	100131581	NA
8144717	-1.79	0.288915	0.000393479	0.00153231	-1	-2.95	0.129645	1.61e-06	5.85e-06	-1	-1.16	0.448732	0.0125091	0.0292886	-1	2.75	6.72868	2.53e-07	2.14e-06	1	0.96	1.94402	0.0187857	0.134653	0	-0.2	0.872342	0.592732	0.685448	0	5.19797	6.98925	8.14533	7.9483	---	---	NA	NA
8144931	-1.4	0.379293	0.00154892	0.00435571	-1	-2.57	0.168972	1.87e-06	6.57e-06	-1	-1.17	0.445492	0.00540733	0.0157619	-1	1.64	3.10601	5.8e-05	0.000146094	1	0.24	1.17809	0.491359	0.709836	0	-0.93	0.524829	0.00795578	0.0301254	0	4.46255	5.86116	7.02769	6.09761	ATP6V1B2	ATPase, H+ transporting, lysosomal 56/58kDa, V1 subunit B2	526	606939	8
8146225	-2.29	0.204053	5.55e-05	0.000373318	-1	-3.93	0.0658278	4.96e-08	4.27e-07	-1	-1.63	0.322602	0.00164246	0.00661037	-1	2.44	5.41647	4.65e-06	1.89e-05	1	0.14	1.10525	0.725809	0.861587	0	-1.49	0.356554	0.000907077	0.00707222	-1	5.19674	7.48972	9.1219	7.63409	C8orf40	chromosome 8 open reading frame 40	114926	NA	8, 8, 8, 8
8146637	-1.12	0.461214	0.00307507	0.00744158	-1	-2.18	0.220059	3.44e-06	1.07e-05	-1	-1.07	0.477129	0.0039951	0.0126179	-1	1.58	2.99544	2.19e-05	6.5e-05	1	0.47	1.38154	0.129519	0.355453	0	-0.6	0.659173	0.0455262	0.102333	0	5.55701	6.6735	7.74105	7.13978	YTHDF3	YTH domain family, member 3	253943	NA	8
8147228	-1.39	0.380761	0.00301976	0.00732394	-1	-2.44	0.184867	1.54e-05	3.78e-05	-1	-1.04	0.48552	0.019417	0.0410544	-1	1.62	3.07677	0.000225557	0.000471337	1	0.23	1.17152	0.542213	0.747074	0	-0.81	0.568795	0.0309372	0.0779205	0	5.18252	6.57556	7.61796	6.80394	DECR1	2,4-dienoyl CoA reductase 1, mitochondrial	1666	222745	8
8147724	-1.26	0.418951	0.000929528	0.00293746	-1	-2.61	0.164044	1.59e-07	9.92e-07	-1	-1.35	0.39156	0.000397626	0.00244457	-1	1.97	3.91718	6.4e-07	4.2e-06	1	0.71	1.64111	0.0214493	0.142357	0	-0.64	0.642591	0.0307253	0.0775475	0	3.32381	4.57895	5.93165	5.29362	ATP6V1C1	ATPase, H+ transporting, lysosomal 42kDa, V1 subunit C1	528	603097	8
8148040	-1.78	0.290454	0.000282117	0.0012024	-1	-4.03	0.061021	3.3e-09	7.2e-08	-1	-2.25	0.210088	1.32e-05	0.000266156	-1	1.67	3.18697	0.000107937	0.000250128	1	-0.11	0.925669	0.76116	0.883053	0	-2.36	0.194472	5.81e-07	4.48e-05	-1	4.68743	6.47105	8.72198	6.35961	MAL2	mal, T-cell differentiation protein 2	114569	609684	8
8148333	-1.35	0.391746	5.95e-05	0.000391581	-1	-2.5	0.176916	4.15e-08	3.79e-07	-1	-1.15	0.451608	0.0004702	0.00276479	-1	1.62	3.0635	8.6e-07	5.22e-06	1	0.26	1.20012	0.285903	0.532825	0	-0.88	0.541982	0.00135882	0.0092463	0	3.8771	5.22911	6.37597	5.49229	EFR3A	EFR3 homolog A (S. cerevisiae)	23167	611798	8
8149248	-1.52	0.347996	0.000120821	0.000648036	-1	-2.87	0.136525	1.97e-08	2.34e-07	-1	-1.35	0.392318	0.00033901	0.00217472	-1	2.72	6.5767	2.51e-09	9.25e-08	1	1.19	2.28866	0.000402657	0.0225715	1	-0.16	0.897885	0.570739	0.665964	0	3.90123	5.42409	6.77399	6.61859	LRLE1	liver-related low express protein 1	100133175	NA
8149475	-1.67	0.313461	0.000491874	0.00181277	-1	-3.1	0.117012	3.37e-07	1.73e-06	-1	-1.42	0.373289	0.00194202	0.00740174	-1	2.51	5.70589	4.61e-07	3.32e-06	1	0.84	1.78858	0.0295032	0.167419	0	-0.58	0.667656	0.104483	0.188716	0	3.31104	4.98468	6.40632	5.82349	CNOT7	CCR4-NOT transcription complex, subunit 7	29883	604913	8, 8
8150089	-1.42	0.375	3.51e-05	0.000272907	-1	-2.47	0.180168	1.33e-08	1.79e-07	-1	-1.06	0.480447	0.000679079	0.00354736	-1	1.63	3.0984	5.82e-07	3.9e-06	1	0.22	1.1619	0.376357	0.618175	0	-0.84	0.558232	0.00119833	0.00847278	0	5.67967	7.09471	8.15226	7.3112	TMEM66	transmembrane protein 66	51669	NA	8
8150714	-1.79	0.289415	0.000396261	0.00154147	-1	-3.33	0.0996005	2.41e-07	1.35e-06	-1	-1.54	0.344144	0.00148991	0.00619013	-1	2.78	6.86811	2.18e-07	1.93e-06	1	0.99	1.98773	0.015575	0.12212	0	-0.55	0.684067	0.144952	0.239092	0	4.21075	5.99954	7.53845	6.99066	PCMTD1	protein-L-isoaspartate (D-aspartate) O-methyltransferase domain containing 1	115294	NA	8
8150757	-1.14	0.4548	0.00118733	0.00356165	-1	-2.59	0.165639	7.05e-08	5.54e-07	-1	-1.46	0.364202	8.89e-05	0.000889532	-1	2.01	4.02213	1.36e-07	1.38e-06	1	0.87	1.82927	0.00364269	0.0603306	0	-0.59	0.666223	0.0345715	0.083922	0	3.89065	5.02735	6.48453	5.89861	RB1CC1	RB1-inducible coiled-coil 1	9821	114480, 606837	8
8151254	-1.12	0.461085	0.00077965	0.0025662	-1	-2.17	0.22163	3.4e-07	1.74e-06	-1	-1.06	0.480671	0.00116636	0.00520387	-1	1.51	2.83899	4.88e-06	1.97e-05	1	0.39	1.30902	0.138221	0.366055	0	-0.67	0.629206	0.0113034	0.0381587	0	5.21433	6.33123	7.3881	6.71971	NCOA2	nuclear receptor coactivator 2	10499	601993	8
8151471	-1.79	0.289534	1.65e-05	0.000163993	-1	-2.79	0.144433	5.16e-08	4.41e-07	-1	-1	0.498846	0.00520762	0.0153105	-1	2.08	4.21443	2.68e-07	2.24e-06	1	0.29	1.22022	0.328248	0.574736	0	-0.72	0.608703	0.0165188	0.0501298	0	3.00009	4.78829	5.79162	5.07543	MRPS28	mitochondrial ribosomal protein S28	28957	611990	8
8151561	-1.15	0.449186	0.0116861	0.0219185	-1	-2.2	0.218077	5.98e-05	0.000120742	-1	-1.04	0.485494	0.0199046	0.0418324	-1	1.47	2.76141	0.000602687	0.00110592	1	0.31	1.24039	0.408933	0.645494	0	-0.73	0.602201	0.0506335	0.11054	0	3.58709	4.7417	5.78418	5.0525	ZFAND1	zinc finger, AN1-type domain 1	79752	NA	8
8151587	-1.27	0.415912	4e-05	0.000297663	-1	-2.51	0.176106	1.13e-09	3.8e-08	-1	-1.24	0.423423	3.3e-05	0.000472335	-1	1.69	3.23506	3.94e-08	5.93e-07	1	0.43	1.3455	0.0587325	0.238841	0	-0.81	0.569715	0.000506443	0.00476824	0	3.69681	4.96246	6.20229	5.39061	C8orf59	chromosome 8 open reading frame 59	401466	NA	8
8152041	-1.35	0.393346	0.000549566	0.00196767	-1	-2.54	0.172023	3.15e-07	1.65e-06	-1	-1.19	0.437332	0.00151355	0.00624562	-1	1.91	3.75676	1.17e-06	6.53e-06	1	0.56	1.47771	0.0670172	0.255071	0	-0.63	0.646249	0.0350121	0.0847043	0	4.98317	6.32929	7.52249	6.89265	RNF19A	ring finger protein 19A	25897	607119	8, 8
8152477	-1.38	0.383307	1.83e-05	0.000177481	-1	-2.49	0.178409	7.04e-09	1.16e-07	-1	-1.1	0.465448	0.000267879	0.00184628	-1	2.03	4.09471	6.44e-09	1.73e-07	1	0.65	1.56953	0.00833505	0.0908813	0	-0.45	0.730535	0.0499739	0.109582	0	4.7992	6.18263	7.28594	6.83296	RAD21	RAD21 homolog (S. pombe)	5885	606462	8
8152628	-1.32	0.400818	0.000527924	0.00191021	-1	-2.43	0.185125	4.34e-07	2.11e-06	-1	-1.11	0.461868	0.0022233	0.00813076	-1	1.57	2.96007	1.5e-05	4.77e-05	1	0.25	1.18645	0.39787	0.637234	0	-0.87	0.547983	0.00451454	0.0205533	0	4.4106	5.72958	6.84403	5.97623	DERL1	Der1-like domain family, member 1	79139	608813	8
8154207	-2.34	0.197507	3.9e-07	1.68e-05	-1	-3.9	0.066892	9.28e-11	8.02e-09	-1	-1.56	0.338681	7.46e-05	0.00080659	-1	2.83	7.11305	1.29e-09	5.88e-08	1	0.49	1.40488	0.103491	0.315316	0	-1.07	0.475806	0.000707217	0.00595118	-1	4.40663	6.74665	8.30866	7.2371	---	---	NA	NA
8154305	-2.54	0.17143	2.02e-05	0.000188619	-1	-4.1	0.0581375	3.49e-08	3.37e-07	-1	-1.56	0.339132	0.00290668	0.00990429	-1	3.08	8.43649	1.84e-07	1.7e-06	1	0.53	1.44627	0.2132	0.455886	0	-1.03	0.490476	0.016818	0.0507812	0	3.43931	5.98362	7.5437	6.51595	SELT	selenoprotein T	51714	607912	3
8154531	-1.18	0.442537	4.87e-06	7.58e-05	-1	-2.65	0.159831	1.57e-11	3.03e-09	-1	-1.47	0.361171	1.63e-07	1.42e-05	-1	2.19	4.55584	3.47e-12	1.99e-09	1	1.01	2.01613	5.09e-06	0.00278371	1	-0.46	0.728166	0.011242	0.0380572	0	4.27619	5.45232	6.92156	6.4639	DENND4C	DENN/MADD domain containing 4C	55667	NA	9
8155422	-1.31	0.404371	0.00108665	0.00332444	-1	-2.44	0.184633	1.26e-06	4.8e-06	-1	-1.13	0.456593	0.00343999	0.0112751	-1	2.07	4.20254	7.25e-07	4.59e-06	1	0.77	1.69938	0.0202368	0.139056	0	-0.37	0.775927	0.227124	0.334234	0	5.2263	6.53255	7.66356	7.29756	CBWD5	COBW domain containing 5	220869	NA	9
8155849	-1.92	0.265094	2.54e-06	4.9e-05	-1	-2.97	0.127954	5.27e-09	9.68e-08	-1	-1.05	0.482673	0.00210928	0.00786643	-1	2.37	5.17181	1.77e-08	3.39e-07	1	0.46	1.37101	0.108525	0.321856	0	-0.6	0.661752	0.0317692	0.0791706	0	6.04042	7.95584	9.00672	8.41109	ANXA1	annexin A1	301	151690	9
8157691	-1.97	0.25485	1.6e-05	0.000161431	-1	-3.14	0.11346	3.42e-08	3.32e-07	-1	-1.17	0.445203	0.00338624	0.0111256	-1	2.63	6.19901	2.88e-08	4.8e-07	1	0.66	1.57982	0.0490443	0.2179	0	-0.51	0.70334	0.108708	0.194164	0	4.27862	6.2509	7.41836	6.91066	LOC729012	similar to Spindle and kinetochore-associated protein 2 (Protein FAM33A)	729012	NA
8160587	-1.29	0.408266	0.00889317	0.0175493	-1	-2.47	0.180369	3.28e-05	7.21e-05	-1	-1.18	0.441792	0.0146709	0.0331202	-1	1.47	2.77551	0.00115835	0.00198214	1	0.18	1.13315	0.653764	0.819302	0	-1	0.500616	0.0152739	0.0474719	0	3.54737	4.83979	6.01835	5.02012	NDUFB6	NADH dehydrogenase (ubiquinone) 1 beta subcomplex, 6, 17kDa	4712	603322	9
8161242	-1.11	0.462434	1.65e-05	0.000163808	-1	-2.21	0.216863	9.84e-10	3.55e-08	-1	-1.09	0.46896	2.05e-05	0.000347814	-1	1.51	2.85186	9.04e-09	2.12e-07	1	0.4	1.3188	0.0335076	0.180163	0	-0.69	0.618463	0.000553351	0.0050532	0	4.21337	5.32605	6.41851	5.72527	EXOSC3	exosome component 3	51010	606489	9, 9
8161575	-1.21	0.433545	0.00158636	0.00443605	-1	-2.92	0.131882	4.18e-08	3.81e-07	-1	-1.72	0.304195	3.63e-05	0.000503637	-1	1.99	3.97979	8.02e-07	4.95e-06	1	0.79	1.72542	0.0140419	0.116899	0	-0.93	0.524864	0.00356418	0.0174256	0	4.88871	6.09446	7.81139	6.8814	CBWD5	COBW domain containing 5	220869	NA	9
8161747	-1.3	0.406067	3.69e-05	0.000280888	-1	-2.38	0.191984	1.07e-08	1.54e-07	-1	-1.08	0.47279	0.00028661	0.00193391	-1	1.84	3.57852	2.33e-08	4.1e-07	1	0.54	1.45312	0.0234065	0.149666	0	-0.54	0.687019	0.0189439	0.0549535	0	4.38615	5.68636	6.76709	6.22552	ZFAND5	zinc finger, AN1-type domain 5	7763	604761	9
8162047	-2.11	0.23155	1.06e-05	0.00012282	-1	-3.35	0.0977892	1.1e-08	1.57e-07	-1	-1.24	0.422324	0.00233227	0.00840591	-1	2.64	6.21252	2.93e-08	4.84e-07	1	0.52	1.43851	0.120484	0.340646	0	-0.72	0.607517	0.0271504	0.0711023	0	5.88478	7.99539	9.23897	8.51996	HNRNPK	heterogeneous nuclear ribonucleoprotein K	3190	600712	9, 9
8162147	-1.13	0.455608	0.00033363	0.00136384	-1	-2.26	0.208909	5.95e-08	4.87e-07	-1	-1.12	0.458527	0.000323492	0.00210732	-1	1.49	2.81348	1.93e-06	9.5e-06	1	0.36	1.28184	0.141927	0.371764	0	-0.77	0.58776	0.00255623	0.0140838	0	5.44301	6.57715	7.70207	6.93536	ZCCHC6	zinc finger, CCHC domain containing 6	79670	NA	9
8163402	-1.69	0.310232	0.000107674	0.000596234	-1	-3.24	0.10616	2.05e-08	2.4e-07	-1	-1.55	0.342195	0.000253286	0.00177479	-1	2.07	4.18456	1.19e-06	6.62e-06	1	0.38	1.29819	0.245391	0.491628	0	-1.17	0.444232	0.000831823	0.00662867	-1	3.74384	5.43242	6.97953	5.80892	ROD1	ROD1 regulator of differentiation 1 (S. pombe)	9991	607527	9
8163481	-1.05	0.481915	0.000234804	0.00105449	-1	-2.27	0.207646	1.03e-08	1.5e-07	-1	-1.21	0.430876	4.21e-05	0.000551368	-1	1.19	2.27871	1.1e-05	3.7e-05	1	0.14	1.09815	0.529608	0.737753	0	-1.08	0.473165	2.56e-05	0.000615542	-1	4.72425	5.7774	6.99205	5.91247	CDC26	cell division cycle 26 homolog (S. cerevisiae)	246184	NA	9
8163882	-1.36	0.390213	3.34e-05	0.000263325	-1	-2.38	0.192512	1.94e-08	2.32e-07	-1	-1.02	0.49335	0.000725495	0.00371328	-1	1.75	3.37201	1.08e-07	1.18e-06	1	0.4	1.3158	0.0991935	0.3089	0	-0.62	0.649152	0.0100954	0.035313	0	4.88608	6.24375	7.26306	6.63969	RAB14	RAB14, member RAS oncogene family	51552	NA	9
8164155	-2.04	0.243322	4.55e-07	1.8e-05	-1	-3.43	0.0925204	1.21e-10	9.62e-09	-1	-1.4	0.380239	6.86e-05	0.000760283	-1	2.47	5.5352	1.43e-09	6.23e-08	1	0.43	1.34683	0.10467	0.316916	0	-0.97	0.512119	0.000618897	0.0054208	0	4.14881	6.18787	7.58289	6.61744	PPP6C	protein phosphatase 6, catalytic subunit	5537	300141	9
8164165	-1.02	0.49221	0.0269907	0.0442066	-1	-2.43	0.185722	1.8e-05	4.32e-05	-1	-1.41	0.377323	0.00298233	0.010092	-1	1.01	2.0207	0.0114847	0.0159984	1	-0.01	0.994611	0.983667	0.99227	0	-1.41	0.375289	0.000631707	0.00551093	-1	5.6658	6.68846	8.09458	6.68066	HSPA5	heat shock 70kDa protein 5 (glucose-regulated protein, 78kDa)	3309	138120	9
8164701	-1.09	0.468426	0.00134135	0.00390266	-1	-2.29	0.204424	2.05e-07	1.19e-06	-1	-1.2	0.436406	0.000469849	0.00276422	-1	1.73	3.32219	7.87e-07	4.88e-06	1	0.64	1.5562	0.0226774	0.147464	0	-0.56	0.679134	0.0337137	0.0822966	0	4.59395	5.68805	6.88431	6.32608	SETX	senataxin	23064	602433, 606002, 608465	9
8165642	-1.03	0.48825	0.0269739	0.0441912	-1	-2.16	0.222993	0.000109014	0.00020496	-1	-1.13	0.456719	0.0155275	0.0344673	-1	1.34	2.5328	0.00192757	0.0031308	1	0.31	1.23664	0.433065	0.664678	0	-0.82	0.564797	0.0351715	0.0849258	0	5.5556	6.58991	7.72053	6.89634	TMEM203	transmembrane protein 203	94107	NA	9
8166442	-1.27	0.415352	0.00552296	0.0119029	-1	-2.57	0.168612	3.88e-06	1.18e-05	-1	-1.3	0.40595	0.00366296	0.0118566	-1	1.75	3.35273	4.91e-05	0.000127385	1	0.48	1.39257	0.195943	0.435861	0	-0.82	0.565311	0.0226326	0.0624739	0	5.38094	6.64854	7.94916	7.12628	FAM3C	family with sequence similarity 3, member C	10447	608618	7
8166826	-1.28	0.412792	6.04e-05	0.000394631	-1	-2.42	0.186831	8.07e-09	1.26e-07	-1	-1.14	0.452603	0.000172958	0.00137799	-1	1.73	3.32154	8.94e-08	1.03e-06	1	0.46	1.37111	0.0564318	0.234012	0	-0.69	0.620567	0.00408673	0.0191755	0	4.54949	5.826	6.96969	6.28134	USP9X	ubiquitin specific peptidase 9, X-linked	8239	300072	X
8167449	-1.21	0.430968	0.00463787	0.0103147	-1	-2.45	0.182981	4.67e-06	1.38e-05	-1	-1.24	0.42458	0.00372042	0.0119823	-1	1.33	2.51174	0.000680683	0.0012331	1	0.11	1.08248	0.739054	0.870004	0	-1.12	0.459601	0.00224842	0.0128611	-1	7.17571	8.39006	9.62595	8.5044	PLP2	proteolipid protein 2 (colonic epithelium-enriched)	5355	300112	X
8168316	-1.35	0.392033	9.81e-06	0.000116933	-1	-2.48	0.179566	8.06e-10	3.11e-08	-1	-1.13	0.458039	6.85e-05	0.00075962	-1	2.12	4.3509	2.62e-10	2.18e-08	1	0.77	1.70569	0.00107692	0.0358896	0	-0.36	0.781274	0.0778299	0.151515	0	4.84862	6.19957	7.32603	6.96993	OGT	O-linked N-acetylglucosamine (GlcNAc) transferase (UDP-N-acetylglucosamine:polypeptide-N-acetylglucosaminyl transferase)	8473	300255	X
8168432	-1.24	0.422709	1.59e-07	1.04e-05	-1	-2.97	0.127559	2.08e-13	4.55e-10	-1	-1.73	0.301767	1.08e-09	8.14e-07	-1	1.92	3.78326	5.29e-12	2.22e-09	1	0.68	1.59922	0.000120565	0.0125266	0	-1.05	0.482591	4.5e-07	3.73e-05	-1	3.77848	5.02074	6.74924	5.69811	RLIM	ring finger protein, LIM domain interacting	51132	300379	X
8168470	-1.46	0.362625	0.0296098	0.047844	-1	-3.04	0.121927	9.18e-05	0.000175922	-1	-1.57	0.336235	0.0167422	0.0365214	-1	1.75	3.3643	0.00320883	0.00496402	1	0.29	1.21998	0.604939	0.78787	0	-1.29	0.410199	0.0190381	0.0551274	0	4.12581	5.58926	7.16172	5.87612	COX7B	cytochrome c oxidase subunit VIIb	1349	603792	X
8169473	-1.4	0.378372	0.000128018	0.000673421	-1	-3.26	0.104571	6.41e-10	2.72e-08	-1	-1.86	0.276371	2.68e-06	9.67e-05	-1	2	4.01229	9.9e-08	1.11e-06	1	0.6	1.51814	0.0327694	0.177708	0	-1.25	0.41957	5.31e-05	0.00104961	-1	4.71806	6.12018	7.9755	6.72249	PLS3	plastin 3 (T isoform)	5358	300131	X, X
8169740	-2.72	0.152019	1.39e-05	0.000145297	-1	-3.96	0.0641872	1.17e-07	7.88e-07	-1	-1.24	0.422232	0.0174011	0.0376135	-1	3.02	8.12022	5.44e-07	3.75e-06	1	0.3	1.23443	0.490348	0.709683	0	-0.94	0.521215	0.033231	0.0815301	0	6.38507	9.10275	10.3466	9.40659	H3F3A	H3 histone, family 3A	3020	601128	1
8172119	-1.01	0.49739	0.000257366	0.00112306	-1	-2.06	0.240544	2.09e-08	2.43e-07	-1	-1.05	0.483611	0.000136466	0.00118335	-1	1.49	2.81696	1.64e-07	1.56e-06	1	0.49	1.40113	0.0252674	0.155565	0	-0.56	0.677601	0.00803301	0.0303476	0	4.95434	5.96189	7.00997	6.44847	MED14	mediator complex subunit 14	9282	300182	X
8173607	-3.01	0.123918	9.28e-08	7.93e-06	-1	-4.34	0.0493487	3.39e-10	1.93e-08	-1	-1.33	0.398237	0.00210664	0.00786466	-1	3.68	12.8507	1.59e-10	1.57e-08	1	0.67	1.59243	0.060004	0.241821	0	-0.66	0.634165	0.0539877	0.116055	0	4.5122	7.52474	8.85304	8.19597	---	---	NA	NA
8173732	-1.23	0.426707	0.000826044	0.00268735	-1	-2.63	0.161439	8.27e-08	6.11e-07	-1	-1.4	0.378338	0.000193018	0.0014827	-1	1.69	3.23013	3.92e-06	1.65e-05	1	0.46	1.37832	0.111826	0.327889	0	-0.94	0.521471	0.00198968	0.0118331	0	4.32465	5.55333	6.95558	6.01624	TAF9B	TAF9B RNA polymerase II, TATA box binding protein (TBP)-associated factor, 31kDa	51616	300754	X, X_random
8174253	-1.07	0.475832	0.00404772	0.00925677	-1	-2.38	0.192704	6.04e-07	2.74e-06	-1	-1.3	0.404983	0.000589268	0.00323358	-1	1.94	3.84477	7.02e-07	4.5e-06	1	0.87	1.82947	0.00668003	0.0820733	0	-0.43	0.740902	0.128674	0.21895	0	4.63462	5.7061	7.01017	6.57752	MORF4L2	mortality factor 4 like 2	9643	300409	X, X
8174779	-1.29	0.409568	6.11e-06	8.54e-05	-1	-2.67	0.15659	3.94e-11	4.98e-09	-1	-1.39	0.382328	1.38e-06	6.42e-05	-1	1.58	2.99749	1.26e-08	2.64e-07	1	0.3	1.22768	0.13153	0.35777	0	-1.09	0.469376	3.33e-06	0.00014342	-1	4.81611	6.10393	7.49105	6.39987	LAMP2	lysosomal-associated membrane protein 2	3920	300257, 309060	X, X
8176263	-1.23	0.426707	0.000826044	0.00268735	-1	-2.63	0.161439	8.27e-08	6.11e-07	-1	-1.4	0.378338	0.000193018	0.0014827	-1	1.69	3.23013	3.92e-06	1.65e-05	1	0.46	1.37832	0.111826	0.327889	0	-0.94	0.521471	0.00198968	0.0118331	0	4.32465	5.55333	6.95558	6.01624	TAF9B	TAF9B RNA polymerase II, TATA box binding protein (TBP)-associated factor, 31kDa	51616	300754	X, X_random
7897620	-1.48	0.359649	0.00047868	0.00178019	-1	-1.69	0.309506	0.00025941	0.00044414	-1	-0.22	0.860579	0.554514	0.624693	0	0.81	1.75877	0.0177899	0.023978	0	-0.66	0.632539	0.0496303	0.219176	0	-0.88	0.54435	0.0096108	0.0343874	0	4.11474	5.59008	5.8067	4.9293	PGD	phosphogluconate dehydrogenase	5226	172200	1
7899534	-1.01	0.496877	0.000436212	0.00165851	-1	-1.59	0.331418	3.31e-06	1.04e-05	-1	-0.58	0.667002	0.0243595	0.0491461	0	0.85	1.80443	0.000678645	0.00122962	0	-0.16	0.896579	0.472844	0.696404	0	-0.74	0.59802	0.00161847	0.0103885	0	4.426	5.43504	6.01928	5.27754	EPB41	erythrocyte membrane protein band 4.1 (elliptocytosis 1, RH-linked)	2035	130500, 611804	1
7900426	-1.21	0.432274	0.000268769	0.00115849	-1	-1.48	0.359141	4.97e-05	0.000102865	-1	-0.27	0.830818	0.342714	0.420685	0	0.74	1.67518	0.005995	0.00880324	0	-0.47	0.724136	0.0716137	0.26509	0	-0.73	0.601626	0.0049584	0.0219053	0	5.26982	6.4798	6.7472	6.01413	SMAP2	small ArfGAP2	64744	NA	1
7903619	-1	0.499877	0.00174007	0.00475398	-1	-1.6	0.330246	1.86e-05	4.45e-05	-1	-0.6	0.660654	0.0416011	0.0743609	0	0.97	1.95953	0.000722927	0.00130015	0	-0.03	0.979526	0.905203	0.958425	0	-0.63	0.647128	0.0141432	0.0447709	0	5.71662	6.71697	7.31501	6.68713	SARS	seryl-tRNA synthetase	6301	607529	1
7906079	-1.22	0.429283	0.000504125	0.00184548	-1	-2.12	0.229254	6.76e-07	2.99e-06	-1	-0.9	0.534039	0.00531019	0.0155285	0	0.73	1.65408	0.0110809	0.0154674	0	-0.49	0.710068	0.0741771	0.2692	0	-1.4	0.379204	1.14e-05	0.000354767	-1	5.4308	6.6508	7.55579	6.15683	RAB25	RAB25, member RAS oncogene family	57111	NA	1
7911341	-1.07	0.475074	0.000110669	0.000606258	-1	-1.06	0.478183	0.000304098	0.00051282	-1	0.01	1.00654	0.967728	0.977114	0	0.94	1.92476	0.000132928	0.000299039	0	-0.13	0.914405	0.531405	0.739032	0	-0.12	0.920389	0.551772	0.649168	0	9.63768	10.7115	10.702	10.5824	---	---	NA	NA
7911559	-1.29	0.409085	0.000566693	0.00201186	-1	-1.38	0.383222	0.000508525	0.000816854	-1	-0.09	0.936779	0.769487	0.814808	0	0.81	1.74819	0.00942062	0.0133252	0	-0.48	0.715158	0.101513	0.312397	0	-0.58	0.669945	0.0447468	0.10108	0	5.79044	7.07997	7.17419	6.5963	MRPL20	mitochondrial ribosomal protein L20	55052	611833	1
7913256	-1.03	0.490282	7.77e-05	0.000468134	-1	-1.09	0.468898	4.5e-05	9.44e-05	-1	-0.06	0.956386	0.757428	0.804633	0	0.69	1.61357	0.000820749	0.00145596	0	-0.34	0.791106	0.0805024	0.278861	0	-0.4	0.756602	0.0287533	0.0742153	0	5.43427	6.46258	6.52692	6.12453	DDOST	dolichyl-diphosphooligosaccharide-protein glycosyltransferase	1650	602202	1
7914940	-1.03	0.488725	0.000361509	0.00144281	-1	-1.33	0.399087	2.74e-05	6.18e-05	-1	-0.29	0.816587	0.233582	0.305343	0	0.81	1.74734	0.000905912	0.00159179	0	-0.23	0.853968	0.299751	0.546272	0	-0.52	0.697339	0.016799	0.0507405	0	5.05693	6.08984	6.38216	5.86209	MRPS15	mitochondrial ribosomal protein S15	64960	611979	1
7916432	-1.21	0.433078	0.000438326	0.00166424	-1	-2.09	0.234689	5.32e-07	2.47e-06	-1	-0.88	0.541909	0.00513459	0.0151611	0	0.72	1.6528	0.00629578	0.00920657	0	-0.48	0.715791	0.0688672	0.259359	0	-1.37	0.387894	8.51e-06	0.00027864	-1	5.67072	6.87802	7.7619	6.39563	DHCR24	24-dehydrocholesterol reductase	1718	602398, 606418	1
7920128	-1.02	0.494342	0.00813801	0.0163283	-1	-1.05	0.483758	0.00769605	0.0101356	-1	-0.03	0.978589	0.927498	0.945666	0	0.58	1.49748	0.0610253	0.0752049	0	-0.43	0.740268	0.167392	0.402365	0	-0.47	0.724418	0.11637	0.203283	0	7.82347	8.83989	8.87111	8.40601	S100A11	S100 calcium binding protein A11	6282	603114	1
7928300	-1.11	0.463821	1.22e-05	0.000133311	-1	-1.23	0.426023	8.58e-06	2.29e-05	-1	-0.12	0.918508	0.542384	0.613398	0	0.8	1.7367	0.0001886	0.000403126	0	-0.31	0.805516	0.0898365	0.294029	0	-0.43	0.739873	0.0184364	0.053971	0	4.97948	6.08784	6.21048	5.77583	C10orf104	chromosome 10 open reading frame 104	119504	NA	10
7928401	-1.13	0.457394	0.000878789	0.00281628	-1	-1.2	0.43615	0.000849729	0.00131025	-1	-0.07	0.953553	0.815304	0.854385	0	0.76	1.69333	0.00669438	0.00975034	0	-0.37	0.774519	0.165998	0.400858	0	-0.44	0.738545	0.0900912	0.168417	0	4.64087	5.76936	5.83797	5.40073	CHCHD1	coiled-coil-helix-coiled-coil-helix domain containing 1	118487	608842	10
7932069	-1.04	0.485183	0.000109906	0.000603708	-1	-2	0.249678	1.99e-08	2.35e-07	-1	-0.96	0.514605	0.000248012	0.00174679	0	0.73	1.65414	0.00120928	0.00205673	0	-0.32	0.802564	0.119666	0.338869	0	-1.28	0.413003	7.65e-07	5.47e-05	-1	3.17567	4.21906	5.17753	3.90175	NUDT5	nudix (nucleoside diphosphate linked moiety X)-type motif 5	11164	609230	10
7932227	-1.01	0.496683	0.000674982	0.0022928	-1	-1.14	0.453959	0.000132523	0.000243791	-1	-0.13	0.913982	0.595952	0.662903	0	0.82	1.76037	0.000537363	0.00100033	0	-0.19	0.874348	0.384066	0.624922	0	-0.32	0.799138	0.113188	0.199622	0	5.05735	6.06696	6.19672	5.87324	NMT2	N-myristoyltransferase 2	9397	603801	10
7935627	-1.17	0.443533	0.00532823	0.0115653	-1	-1.1	0.4659	0.0116484	0.0149447	-1	0.07	1.05043	0.851533	0.884717	0	0.76	1.69399	0.0316992	0.0409966	0	-0.41	0.751343	0.229464	0.475045	0	-0.34	0.789232	0.296348	0.407951	0	4.68413	5.85701	5.78603	5.44455	GOT1	glutamic-oxaloacetic transaminase 1, soluble (aspartate aminotransferase 1)	2805	138180	10
7935810	-1.24	0.42465	3.86e-05	0.000289575	-1	-1.22	0.429825	9.08e-05	0.000174362	-1	0.02	1.01219	0.94227	0.957422	0	0.91	1.87991	0.000270235	0.000552035	0	-0.32	0.798304	0.139569	0.367975	0	-0.31	0.808034	0.144568	0.238619	0	6.11768	7.35333	7.33585	7.02834	NDUFB8	NADH dehydrogenase (ubiquinone) 1 beta subcomplex, 8, 19kDa	4714	602140	10
7937465	-1.42	0.372437	1.1e-05	0.000125975	-1	-1.57	0.337347	5.66e-06	1.62e-05	-1	-0.14	0.905782	0.571062	0.640627	0	0.7	1.62938	0.00350314	0.0053782	0	-0.72	0.606843	0.00346647	0.0591319	0	-0.86	0.549668	0.000455212	0.00444224	0	6.24264	7.66757	7.81033	6.94697	TALDO1	transaldolase 1	6888	602063, 606003	11
7937802	-1.26	0.416283	0.000567677	0.0020147	-1	-1.43	0.370846	0.000282925	0.000480449	-1	-0.17	0.89085	0.596898	0.663618	0	0.93	1.90312	0.00300542	0.00468248	0	-0.34	0.792238	0.239317	0.485559	0	-0.5	0.705765	0.0716659	0.142588	0	6.10083	7.36519	7.53194	7.0292	CD81	CD81 molecule	975	186845	11
7939329	-1.01	0.495148	0.000398095	0.00154555	-1	-1.43	0.372067	1.62e-05	3.94e-05	-1	-0.41	0.751427	0.102502	0.155166	0	0.92	1.89721	0.000264462	0.000541833	0	-0.09	0.939398	0.677789	0.833961	0	-0.5	0.705889	0.0236649	0.064493	0	4.78839	5.80246	6.21475	5.71226	PDHX	pyruvate dehydrogenase complex, component X	8050	245349, 608769	11
7940835	-1.53	0.346036	0.00120569	0.00360426	-1	-1.39	0.382715	0.00348631	0.00483204	-1	0.15	1.106	0.720672	0.77285	0	0.84	1.79267	0.0250182	0.0329209	0	-0.69	0.620329	0.0681604	0.257629	0	-0.54	0.686082	0.121534	0.209838	0	7.0573	8.58831	8.44296	7.89941	COX8A	cytochrome c oxidase subunit 8A (ubiquitous)	1351	123870	11
7940996	-1.43	0.37179	0.000347116	0.0014053	-1	-1.47	0.361801	0.000337558	0.000564196	-1	-0.04	0.973134	0.905886	0.928449	0	0.99	1.9855	0.00255131	0.00402952	0	-0.44	0.73819	0.152766	0.384606	0	-0.48	0.718358	0.0990146	0.18084	0	8.11966	9.5471	9.58639	9.10916	PRDX5	peroxiredoxin 5	25824	606583	11
7942824	-1.02	0.493421	0.00988073	0.019106	-1	-1.06	0.479832	0.00977729	0.0126615	-1	-0.04	0.972459	0.910215	0.932043	0	0.36	1.28397	0.257114	0.285941	0	-0.66	0.633538	0.0486564	0.216733	0	-0.7	0.61609	0.0286664	0.074118	0	9.62627	10.6454	10.6857	9.98688	RPS28	ribosomal protein S28	6234	603685	19
7943827	-1.08	0.472027	6.78e-06	9.06e-05	-1	-1.14	0.454962	5.62e-06	1.61e-05	-1	-0.05	0.963848	0.771745	0.816487	0	0.73	1.65795	0.000143544	0.000318207	0	-0.35	0.782597	0.0398302	0.196739	0	-0.41	0.754305	0.0142205	0.0449521	0	4.73403	5.81709	5.87021	5.46343	DLAT	dihydrolipoamide S-acetyltransferase	1737	245348, 608770	11
7944375	-1.13	0.456628	9.44e-08	7.96e-06	-1	-1.86	0.274668	6.85e-11	6.87e-09	-1	-0.73	0.601514	5.56e-05	0.000669867	0	0.85	1.80049	7.76e-07	4.84e-06	0	-0.28	0.822155	0.0371167	0.189496	0	-1.02	0.494538	5.09e-08	6.79e-06	-1	4.06222	5.19313	5.92646	4.91061	TRAPPC4	trafficking protein particle complex 4	51399	610971	11
7948267	-1.16	0.448754	0.00238154	0.00606993	-1	-1.14	0.454149	0.00356436	0.00493252	-1	0.02	1.01202	0.958734	0.969376	0	0.41	1.3268	0.172822	0.197917	0	-0.75	0.595406	0.0186694	0.134368	0	-0.73	0.602564	0.0154275	0.0478514	0	5.72494	6.88094	6.8637	6.13288	TIMM10	translocase of inner mitochondrial membrane 10 homolog (yeast)	26519	602251	11
7953100	-1.26	0.417958	0.000949819	0.00298776	-1	-1.25	0.419529	0.00158805	0.00232413	-1	0.01	1.00376	0.986904	0.990634	0	0.75	1.67859	0.0162251	0.0220429	0	-0.51	0.701582	0.0916129	0.296634	0	-0.51	0.704218	0.0815891	0.157154	0	5.54429	6.80286	6.79745	6.29154	FKBP4	FK506 binding protein 4, 59kDa	2288	600611	12
7953981	-1.1	0.466857	0.00239705	0.0060992	-1	-1.05	0.48388	0.00602466	0.00806065	-1	0.05	1.03646	0.873194	0.901822	0	0.88	1.83473	0.0055155	0.0081539	0	-0.22	0.856554	0.439217	0.67073	0	-0.17	0.887787	0.538173	0.635906	0	5.07679	6.17574	6.12407	5.95235	ETV6	ets variant 6	2120	131440, 600618, 601626	12
7954196	-1.37	0.388157	0.00488989	0.01077	-1	-1.43	0.370683	0.00307821	0.00430005	-1	-0.07	0.954982	0.874627	0.90296	0	0.47	1.38694	0.196353	0.222649	0	-0.89	0.538351	0.0263204	0.158461	0	-0.96	0.514115	0.0104026	0.0360301	0	4.02775	5.39304	5.4595	4.49966	MGST1	microsomal glutathione S-transferase 1	4257	138330	12, 12, 12, 12
7955441	-1.02	0.492927	0.000591285	0.00207691	-1	-1.22	0.42947	8.04e-05	0.000156399	-1	-0.2	0.871266	0.423242	0.501296	0	0.56	1.46926	0.0143604	0.0197005	0	-0.47	0.724238	0.0455431	0.210056	0	-0.66	0.631004	0.00326697	0.0165101	0	4.07189	5.09244	5.29126	4.62698	METTL7A	methyltransferase like 7A	25840	NA	12
7956013	-1.03	0.488538	8.1e-06	0.000102699	-1	-1.04	0.486209	2.26e-05	5.25e-05	-1	-0.01	0.995234	0.96977	0.978453	0	0.8	1.7416	5.18e-05	0.000132994	0	-0.23	0.85084	0.156081	0.389429	0	-0.24	0.846784	0.135577	0.227264	0	5.34418	6.37763	6.38453	6.14459	BLOC1S1	biogenesis of lysosomal organelles complex-1, subunit 1	2647	601444	12
7956301	-1.06	0.480319	0.000969408	0.00303367	-1	-1.11	0.462789	0.000890096	0.00136671	-1	-0.05	0.963504	0.84587	0.880225	0	0.88	1.83778	0.0013203	0.00222892	0	-0.18	0.882721	0.467159	0.693083	0	-0.23	0.850505	0.322111	0.434101	0	5.09304	6.15098	6.20461	5.97101	LRP1	low density lipoprotein-related protein 1 (alpha-2-macroglobulin receptor)	4035	107770	12
7958784	-1.41	0.375807	8.68e-08	7.76e-06	-1	-1.44	0.36938	1.24e-07	8.28e-07	-1	-0.02	0.982898	0.889709	0.915518	0	0.84	1.79308	1.99e-05	6.03e-05	0	-0.57	0.673851	0.00160869	0.0413689	0	-0.59	0.662327	0.00066195	0.00568428	0	4.42567	5.83761	5.8625	5.26811	ALDH2	aldehyde dehydrogenase 2 family (mitochondrial)	217	100650, 610251	12
7959205	-1.08	0.472116	0.000401398	0.00155646	-1	-1.23	0.425177	0.000139815	0.000255529	-1	-0.15	0.900577	0.557702	0.627638	0	0.81	1.75342	0.00150924	0.00250836	0	-0.27	0.827816	0.243549	0.489562	0	-0.42	0.745512	0.0607624	0.126369	0	5.54483	6.62762	6.7787	6.355	MLEC	malectin	9761	NA	12
7959574	-1	0.499293	0.00053931	0.0019424	-1	-1.36	0.389879	3.63e-05	7.87e-05	-1	-0.36	0.780861	0.160969	0.224576	0	0.79	1.73307	0.00164144	0.00270708	0	-0.21	0.865313	0.352327	0.596127	0	-0.57	0.675689	0.0136625	0.0436171	0	6.1944	7.19644	7.5533	6.98773	SETD8	SET domain containing (lysine methyltransferase) 8	387893	607240	12
7960716	-1.27	0.413719	3.64e-07	1.65e-05	-1	-1.44	0.369416	7.34e-08	5.71e-07	-1	-0.16	0.892915	0.355723	0.434071	0	0.9	1.86919	6.07e-06	2.33e-05	0	-0.37	0.77332	0.0264877	0.158911	0	-0.53	0.69051	0.00135933	0.0092463	0	5.48612	6.75939	6.9228	6.38853	PHB2	prohibitin 2	11331	610704	12, 12
7962935	-1.02	0.493514	0.000711973	0.00238803	-1	-1.61	0.327622	4.97e-06	1.46e-05	-1	-0.59	0.663854	0.0293502	0.0566931	0	0.89	1.85269	0.000543989	0.00101111	0	-0.13	0.914327	0.573102	0.76874	0	-0.72	0.60698	0.0027624	0.0147801	0	5.07408	6.09291	6.68397	5.96369	PRKAG1	protein kinase, AMP-activated, gamma 1 non-catalytic subunit	5571	602742	12
7963406	-1.27	0.414897	0.0175489	0.0307464	-1	-1.53	0.346485	0.00697631	0.00924676	-1	-0.26	0.835112	0.596736	0.663573	0	0.28	1.21791	0.508775	0.539472	0	-0.98	0.505308	0.0325668	0.177285	0	-1.24	0.421988	0.00595703	0.0247215	-1	6.62385	7.89303	8.15299	6.90826	KRT6B	keratin 6B	3854	148042, 167210	12
7963502	-1.31	0.402986	0.00190589	0.00509495	-1	-1.46	0.363155	0.00106243	0.00160363	-1	-0.15	0.90116	0.68489	0.742322	0	0.78	1.71911	0.0232928	0.0307951	0	-0.53	0.69278	0.118191	0.336987	0	-0.68	0.624306	0.0386984	0.0908727	0	6.71686	8.02806	8.1782	7.49852	KRT77	keratin 77	374454	611158	12
7963845	-1.46	0.364175	0.0245632	0.040818	-1	-1.56	0.339311	0.0260179	0.0319086	-1	-0.1	0.931724	0.867597	0.897058	0	0.98	1.96571	0.0817127	0.0986854	0	-0.48	0.715863	0.375776	0.617964	0	-0.58	0.666987	0.272572	0.382538	0	8.9237	10.381	10.483	9.89875	DCD	dermcidin	117159	606634	12
7967987	-1.32	0.399507	1.55e-05	0.000157913	-1	-1.54	0.343682	3.2e-06	1.01e-05	-1	-0.22	0.860265	0.366279	0.444472	0	0.9	1.86073	0.000281609	0.000572594	0	-0.43	0.743373	0.054587	0.229865	0	-0.64	0.639498	0.00377716	0.0181089	0	4.34783	5.67154	5.88868	5.24369	MRP63	mitochondrial ribosomal protein 63	78988	611997	13
7968972	-1.53	0.345294	0.00013218	0.000690328	-1	-1.59	0.332026	0.000141177	0.00025776	-1	-0.06	0.961574	0.863902	0.894254	0	0.59	1.50076	0.0547134	0.0679782	0	-0.95	0.518203	0.00363405	0.060306	0	-1	0.49829	0.00146001	0.00969583	-1	5.75011	7.28421	7.34074	6.3358	COX17	COX17 cytochrome c oxidase assembly homolog (S. cerevisiae)	10063	604813	3
7979085	-1.04	0.486311	0.00175125	0.0047731	-1	-1.46	0.362776	6.81e-05	0.000135236	-1	-0.42	0.745975	0.150575	0.213093	0	0.8	1.73775	0.0037657	0.00574339	0	-0.24	0.845085	0.349379	0.594314	0	-0.67	0.630413	0.0105156	0.0362377	0	4.78703	5.82707	6.24987	5.58424	PYGL	phosphorylase, glycogen, liver	5836	232700	14
7979725	-1.11	0.461701	0.000894841	0.00285592	-1	-1.2	0.436761	0.000656733	0.00103336	-1	-0.08	0.945981	0.7808	0.824471	0	0.96	1.94058	0.000905761	0.00159178	0	-0.16	0.895968	0.53936	0.745259	0	-0.24	0.847569	0.331713	0.444466	0	4.83243	5.9474	6.02752	5.78892	PIGH	phosphatidylinositol glycan anchor biosynthesis, class H	5283	600154	14
7979824	-1.23	0.425992	5.95e-05	0.000391583	-1	-1.16	0.448869	0.000210202	0.000367714	-1	0.08	1.0537	0.76092	0.807458	0	0.99	1.98055	0.000153012	0.000335421	0	-0.25	0.843696	0.273931	0.521977	0	-0.17	0.889005	0.423397	0.530813	0	6.47477	7.70587	7.63041	7.46067	ACTN1	actinin, alpha 1	87	102575	14
7982597	-1.2	0.43531	0.000768005	0.00253321	-1	-1.21	0.433583	0.000508008	0.000816263	-1	-0.01	0.996032	0.984405	0.989371	0	0.85	1.80511	0.00224291	0.00359017	0	-0.35	0.785784	0.200741	0.441066	0	-0.35	0.782666	0.149177	0.244366	0	4.81255	6.01243	6.01817	5.66464	THBS1	thrombospondin 1	7057	188060	15
7987642	-1.01	0.496185	0.0101579	0.0195382	-1	-1.53	0.345445	0.000421324	0.000688723	-1	-0.52	0.696202	0.15	0.212445	0	0.81	1.75035	0.0144173	0.0197612	0	-0.2	0.868499	0.522361	0.732399	0	-0.73	0.604651	0.0219165	0.0610396	0	3.45949	4.47054	4.99297	4.26714	NDUFAF1	NADH dehydrogenase (ubiquinone) 1 alpha subcomplex, assembly factor 1	51103	606934	15
7993185	-1.24	0.422273	7.46e-07	2.37e-05	-1	-1.21	0.432072	3.12e-06	9.89e-06	-1	0.03	1.0232	0.857363	0.889337	0	0.93	1.90982	9.98e-06	3.43e-05	0	-0.31	0.806465	0.0688792	0.259359	0	-0.28	0.825179	0.0904386	0.168873	0	4.26764	5.51139	5.4783	5.20107	NUBP1	nucleotide binding protein 1 (MinD homolog, E. coli)	4682	600280	16
7997230	-1.22	0.429058	0.00080245	0.00262308	-1	-1.88	0.271895	1.08e-05	2.8e-05	-1	-0.66	0.633703	0.045762	0.0802027	0	0.9	1.86217	0.00366576	0.00560582	0	-0.32	0.798979	0.255069	0.502914	0	-0.98	0.506315	0.00123267	0.00863738	0	6.84747	8.06823	8.72635	7.74446	PSMD7	proteasome (prosome, macropain) 26S subunit, non-ATPase, 7	5713	157970	16
7998655	-1.01	0.496023	0.0032767	0.00784442	-1	-1.29	0.408531	0.000512803	0.000823241	-1	-0.28	0.823612	0.360669	0.43898	0	0.78	1.71231	0.00783406	0.0112751	0	-0.24	0.849347	0.390398	0.630905	0	-0.52	0.699532	0.0544737	0.11687	0	8.06227	9.0738	9.35376	8.83822	RPS2	ribosomal protein S2	6187	603624	16
7998852	-1.1	0.46706	1.71e-06	3.85e-05	-1	-1.03	0.489344	6.26e-06	1.75e-05	-1	0.07	1.04771	0.689211	0.745843	0	0.65	1.56735	0.000176726	0.000380575	0	-0.45	0.732045	0.00605802	0.0778146	0	-0.38	0.766973	0.0117848	0.0394065	0	6.19774	7.29606	7.22882	6.84607	TCEB2	transcription elongation factor B (SIII), polypeptide 2 (18kDa, elongin B)	6923	600787	16
8000413	-1.1	0.465596	0.000104847	0.000586231	-1	-1.38	0.385012	1.5e-05	3.69e-05	-1	-0.27	0.826922	0.250886	0.324081	0	0.91	1.87979	0.000220626	0.000461893	0	-0.19	0.875223	0.362006	0.605213	0	-0.47	0.723742	0.0284348	0.0737326	0	5.21889	6.32174	6.59592	6.12946	NSMCE1	non-SMC element 1 homolog (S. cerevisiae)	197370	NA	16
8003953	-1.24	0.422825	7.7e-06	9.98e-05	-1	-1.62	0.325366	2.57e-07	1.42e-06	-1	-0.38	0.769504	0.0848718	0.132439	0	0.62	1.53735	0.00277934	0.0043657	0	-0.62	0.65003	0.00312894	0.0560695	0	-1	0.500201	1.11e-05	0.000348018	0	6.71693	7.9588	8.3368	7.33738	PSMB6	proteasome (prosome, macropain) subunit, beta type, 6	5694	600307	17
8004510	-1.35	0.391662	1.97e-09	8.26e-07	-1	-1.54	0.344403	7.06e-10	2.89e-08	-1	-0.19	0.879339	0.195875	0.263684	0	0.79	1.72559	1.32e-06	7.18e-06	0	-0.57	0.675848	0.000126525	0.012828	0	-0.75	0.5943	2.19e-06	0.000112022	0	5.18311	6.53543	6.72094	5.9702	CD68	CD68 molecule	968	153634	17, 17
8005471	-1.09	0.470534	0.0111511	0.021045	-1	-1.05	0.482885	0.0166871	0.0209663	-1	0.04	1.02625	0.923165	0.942743	0	0.42	1.33511	0.22663	0.254264	0	-0.67	0.628213	0.0630275	0.246486	0	-0.63	0.644704	0.0626817	0.129278	0	9.52543	10.6131	10.5757	9.94239	RPS28	ribosomal protein S28	6234	603685	19
8006820	-1.03	0.491234	3.31e-08	4.35e-06	-1	-1.03	0.491055	2.26e-07	1.29e-06	-1	0	0.999636	0.996742	0.997107	0	0.96	1.9386	4.83e-08	6.82e-07	0	-0.07	0.952309	0.538938	0.745074	0	-0.07	0.951962	0.532292	0.630252	0	5.40039	6.42591	6.42643	6.35541	LASP1	LIM and SH3 protein 1	3927	602920	17
8007141	-1.13	0.45736	1.03e-05	0.0001211	-1	-1.71	0.305975	4.03e-08	3.73e-07	-1	-0.58	0.669003	0.00725052	0.0195162	0	0.89	1.85723	4.47e-05	0.000117571	0	-0.24	0.849425	0.194291	0.433604	0	-0.82	0.568268	7.2e-05	0.00127732	0	7.88735	9.01595	9.59586	8.78051	EIF1	eukaryotic translation initiation factor 1	10209	NA	17
8008132	-1.19	0.43843	1.98e-05	0.000185623	-1	-1.13	0.456394	4.35e-05	9.17e-05	-1	0.06	1.04097	0.787949	0.830175	0	0.77	1.7015	0.000420391	0.000809885	0	-0.42	0.745988	0.0377223	0.190811	0	-0.36	0.776554	0.0522789	0.11325	0	7.10897	8.29855	8.24062	7.87577	ATP5G1	ATP synthase, H+ transporting, mitochondrial F0 complex, subunit C1 (subunit 9)	516	603192	17
8010686	-1.32	0.399929	1.33e-05	0.000141739	-1	-1.26	0.416297	3.78e-05	8.12e-05	-1	0.06	1.04093	0.805604	0.845923	0	0.51	1.42629	0.0204108	0.0272918	0	-0.81	0.570414	0.000774582	0.0308885	0	-0.75	0.59376	0.000916643	0.00712648	0	5.06632	6.38851	6.33064	5.57859	ANAPC11	anaphase promoting complex subunit 11	51529	NA	17, 17, 17_random
8013348	-1.18	0.440105	0.000489064	0.00180751	-1	-1.42	0.373715	9.62e-05	0.000183183	-1	-0.24	0.84915	0.41315	0.491419	0	0.87	1.82394	0.00221956	0.00355487	0	-0.32	0.802728	0.225204	0.469702	0	-0.55	0.681636	0.0304685	0.077131	0	7.93597	9.12005	9.35595	8.80303	RPS2	ribosomal protein S2	6187	603624	16
8015366	-1.08	0.474173	0.000419824	0.00161151	-1	-1.12	0.458691	0.000335467	0.000560788	-1	-0.05	0.967349	0.851024	0.884272	0	0.75	1.6863	0.00227544	0.00363425	0	-0.32	0.799599	0.166644	0.401584	0	-0.37	0.773491	0.0932673	0.173032	0	9.54974	10.6263	10.6742	10.3036	KRT14	keratin 14	3861	125595, 131760, 131800, 131900, 148066, 161000, 601001	17
8015545	-1.03	0.490893	0.00241521	0.00613012	-1	-1.17	0.444074	0.00104418	0.00157905	-1	-0.14	0.904626	0.626499	0.690944	0	0.52	1.43016	0.0564846	0.0700038	0	-0.51	0.702055	0.0639885	0.248668	0	-0.65	0.635097	0.014643	0.0459637	0	5.27104	6.29756	6.44217	5.78722	RAB5C	RAB5C, member RAS oncogene family	5878	604037	17
8015712	-1.12	0.460206	1.55e-06	3.67e-05	-1	-1.15	0.452077	2.49e-06	8.26e-06	-1	-0.03	0.982336	0.881562	0.908662	0	0.77	1.71065	3.92e-05	0.000105038	0	-0.35	0.787253	0.0332886	0.179521	0	-0.37	0.773347	0.0182352	0.053583	0	6.61166	7.7313	7.75702	7.3862	CCDC56	coiled-coil domain containing 56	28958	NA	17
8016552	-1.17	0.444526	0.000658862	0.00225345	-1	-1.43	0.372209	0.000104649	0.000197466	-1	-0.26	0.837318	0.381677	0.460041	0	0.67	1.58798	0.0138991	0.0191105	0	-0.5	0.7059	0.063228	0.246662	0	-0.76	0.591063	0.004643	0.0209548	0	6.9406	8.11026	8.36642	7.6078	PHB	prohibitin	5245	176705	17
8018288	-1.07	0.476359	0.00220765	0.00571573	-1	-1.37	0.387737	0.000381958	0.000629551	-1	-0.3	0.81396	0.341483	0.419467	0	0.94	1.9168	0.00228937	0.00365489	0	-0.13	0.913085	0.63509	0.80864	0	-0.43	0.743215	0.114875	0.201569	0	7.27638	8.34626	8.64323	8.21508	ATP5H	ATP synthase, H+ transporting, mitochondrial F0 complex, subunit d	10476	NA	17
8019183	-1.02	0.494427	0.000293313	0.00123744	-1	-1.12	0.458883	0.000185991	0.000329776	-1	-0.11	0.928109	0.650587	0.712786	0	0.6	1.51943	0.00794516	0.0114199	0	-0.41	0.751249	0.0600481	0.241821	0	-0.52	0.697241	0.0161637	0.0493674	0	7.93108	8.94724	9.05488	8.53461	ACTG1	actin, gamma 1	71	102560, 604717	17
8019687	-1.41	0.376699	4.1e-05	0.00030308	-1	-1.35	0.391584	9.16e-05	0.000175747	-1	0.06	1.03952	0.837147	0.872507	0	0.63	1.54301	0.0142957	0.0196142	0	-0.78	0.581249	0.00365811	0.060403	0	-0.73	0.604217	0.00398928	0.0188774	0	4.89593	6.30444	6.24853	5.52167	ANAPC11	anaphase promoting complex subunit 11	51529	NA	17, 17, 17_random
8019762	-1.46	0.363438	3.46e-06	6.1e-05	-1	-1.3	0.405062	3.22e-05	7.09e-05	-1	0.16	1.11453	0.512195	0.585048	0	0.82	1.76791	0.000684595	0.00123937	0	-0.64	0.642528	0.0058771	0.0764457	0	-0.48	0.716115	0.0248449	0.0668092	0	6.20429	7.66451	7.50808	7.02634	P4HB	prolyl 4-hydroxylase, beta polypeptide	5034	176790	17, 17_random
8024436	-1.28	0.411038	0.000123353	0.000656664	-1	-1.21	0.432457	0.000353291	0.00058726	-1	0.07	1.05211	0.788835	0.830949	0	0.71	1.63062	0.00699845	0.0101513	0	-0.58	0.670245	0.025753	0.157029	0	-0.5	0.705172	0.0381786	0.0899418	0	6.07389	7.35655	7.28326	6.77931	OAZ1	ornithine decarboxylase antizyme 1	4946	601579	19
8025395	-1.04	0.486586	0.0110861	0.0209368	-1	-1.08	0.474403	0.0110215	0.014187	-1	-0.04	0.974962	0.921302	0.941544	0	0.37	1.29487	0.257501	0.286283	0	-0.67	0.630064	0.0538868	0.228005	0	-0.7	0.614288	0.0328955	0.0810598	0	9.56225	10.6015	10.6381	9.93505	RPS28	ribosomal protein S28	6234	603685	19
8027205	-1.61	0.326578	2.38e-05	0.000210905	-1	-1.2	0.435325	0.000789247	0.00122372	-1	0.41	1.33299	0.171942	0.236892	0	0.94	1.91897	0.00133023	0.00224221	0	-0.67	0.626692	0.0179646	0.131194	0	-0.26	0.835375	0.303187	0.41515	0	5.38613	7.00063	6.58596	6.32646	NDUFA13	NADH dehydrogenase (ubiquinone) 1 alpha subcomplex, 13	51079	607464, 609435	19
8027748	-1.15	0.450251	0.00350606	0.00825965	-1	-1.68	0.312466	0.00016028	0.000288493	-1	-0.53	0.693982	0.142794	0.20417	0	0.92	1.88996	0.0068034	0.00989594	0	-0.23	0.850958	0.460122	0.687352	0	-0.76	0.59055	0.0172303	0.0515731	0	6.81634	7.96754	8.49457	7.7347	FXYD3	FXYD domain containing ion transport regulator 3	5349	604996	19, 19, 19
8028380	-1.45	0.365685	6.19e-06	8.63e-05	-1	-1.65	0.31855	1.42e-06	5.26e-06	-1	-0.2	0.871104	0.415125	0.493178	0	0.7	1.61994	0.00297421	0.00463848	0	-0.76	0.59239	0.00190602	0.0439745	0	-0.95	0.516033	9.77e-05	0.00157078	0	5.58229	7.03362	7.2327	6.27824	PSMD8	proteasome (prosome, macropain) 26S subunit, non-ATPase, 8	5714	NA	19
8028514	-1.11	0.464865	0.00621602	0.0131223	-1	-1.39	0.381846	0.00187802	0.00271471	-1	-0.28	0.821413	0.445109	0.521712	0	0.8	1.73693	0.0217116	0.0289003	0	-0.31	0.807437	0.348963	0.594254	0	-0.59	0.663239	0.0714637	0.142212	0	7.18932	8.29443	8.57825	7.98586	EIF3K	eukaryotic translation initiation factor 3, subunit K	27335	609596	19
8029536	-1.18	0.44237	0.0052455	0.0114311	-1	-1.7	0.30715	0.000317192	0.000532763	-1	-0.53	0.694328	0.173887	0.239058	0	0.93	1.9074	0.00890279	0.0126566	0	-0.25	0.843776	0.467744	0.693083	0	-0.77	0.585857	0.0235636	0.0642811	0	4.76753	5.94421	6.47052	5.69914	APOC1	apolipoprotein C-I	341	107710	19
8031097	-1.32	0.399736	2.92e-05	0.000239528	-1	-1.31	0.404508	5.69e-05	0.000115443	-1	0.02	1.01194	0.945503	0.959548	0	0.8	1.74268	0.00114177	0.00195851	0	-0.52	0.696612	0.0269042	0.160006	0	-0.5	0.704928	0.0244697	0.0660766	0	7.50967	8.83255	8.81543	8.31097	NDUFA3	NADH dehydrogenase (ubiquinone) 1 alpha subcomplex, 3, 9kDa	4696	603832	19
8032730	-1.3	0.407108	3.64e-09	1.18e-06	-1	-1.15	0.4521	2.28e-08	2.55e-07	-1	0.15	1.11052	0.262259	0.336237	0	0.73	1.66399	1.12e-06	6.34e-06	0	-0.56	0.677423	9.7e-05	0.0110428	0	-0.41	0.75229	0.00094835	0.0072486	0	7.68762	8.98413	8.8329	8.42226	EEF2	eukaryotic translation elongation factor 2	1938	130610	19
8033257	-1.03	0.489608	0.00640657	0.0134363	-1	-1.71	0.304833	7.41e-05	0.000145669	-1	-0.68	0.622606	0.0525928	0.0899252	0	0.79	1.73218	0.0136729	0.0188172	0	-0.24	0.84809	0.43627	0.667908	0	-0.92	0.528026	0.0035366	0.0173124	0	5.11991	6.15021	6.83382	5.9125	C3	complement component 3	718	120700, 611378	19
8037642	-1.06	0.479557	0.00177782	0.00482697	-1	-1.52	0.349019	8.44e-05	0.000163501	-1	-0.46	0.727793	0.134975	0.195056	0	1	1.99859	0.00102553	0.0017805	0	-0.06	0.958438	0.818519	0.912331	0	-0.52	0.697545	0.0517667	0.112341	0	7.83583	8.89605	9.35445	8.83481	SNRPD2	small nuclear ribonucleoprotein D2 polypeptide 16.5kDa	6633	601061	19
8039939	-1.29	0.409085	0.000566693	0.00201186	-1	-1.38	0.383222	0.000508525	0.000816854	-1	-0.09	0.936779	0.769487	0.814808	0	0.81	1.74819	0.00942062	0.0133252	0	-0.48	0.715158	0.101513	0.312397	0	-0.58	0.669945	0.0447468	0.10108	0	5.79044	7.07997	7.17419	6.5963	MRPL20	mitochondrial ribosomal protein L20	55052	611833	1
8039961	-1	0.498605	7.17e-06	9.45e-05	-1	-1.53	0.346936	8.35e-08	6.15e-07	-1	-0.52	0.695814	0.00744709	0.0198838	0	0.91	1.87765	6.86e-06	2.57e-05	0	-0.1	0.936204	0.541449	0.746907	0	-0.62	0.651424	0.000588606	0.0052469	0	5.43527	6.43931	6.96253	6.3442	ACP1	acid phosphatase 1, soluble	52	171500	2, 2
8042720	-1.12	0.459889	0.00269877	0.00670307	-1	-1.6	0.329977	0.000153857	0.000278401	-1	-0.48	0.717515	0.158504	0.221607	0	0.98	1.97623	0.00259911	0.00409851	0	-0.14	0.908849	0.641001	0.812475	0	-0.62	0.652113	0.0380741	0.0898242	0	5.4371	6.55774	7.03666	6.41985	CCT7	chaperonin containing TCP1, subunit 7 (eta)	10574	605140	2
8043197	-1.29	0.407842	0.0250345	0.0414551	-1	-2.12	0.229523	0.00119511	0.00178687	-1	-0.83	0.562775	0.134043	0.193967	0	0.89	1.85927	0.0721542	0.0878402	0	-0.4	0.758286	0.409188	0.645617	0	-1.23	0.426744	0.0131321	0.0424898	-1	7.2587	8.55262	9.38199	8.15344	VAMP8	vesicle-associated membrane protein 8 (endobrevin)	8673	603177	2
8047372	-1.16	0.446153	0.00329974	0.00788838	-1	-1.53	0.345146	0.000389087	0.000639661	-1	-0.37	0.773606	0.296317	0.372518	0	0.84	1.78649	0.011591	0.0161423	0	-0.33	0.797048	0.301385	0.54816	0	-0.7	0.616601	0.0262427	0.0694267	0	4.43008	5.59446	5.96479	5.2672	NDUFB3	NADH dehydrogenase (ubiquinone) 1 beta subcomplex, 3, 12kDa	4709	603839	2
8050079	-1.08	0.472119	0.00059664	0.00209303	-1	-1.21	0.431683	0.000333561	0.000558027	-1	-0.13	0.914351	0.63376	0.697015	0	0.88	1.84161	0.00121538	0.00206582	0	-0.2	0.86946	0.406228	0.643238	0	-0.33	0.794991	0.16075	0.258771	0	5.30502	6.3878	6.51698	6.18599	RNASEH1	ribonuclease H1	246243	604123	2
8051387	-1.01	0.497485	0.000571788	0.00202272	-1	-1.36	0.388379	4.98e-05	0.000102922	-1	-0.36	0.780686	0.169424	0.234038	0	0.83	1.78299	0.00116124	0.00198552	0	-0.17	0.88701	0.444409	0.674453	0	-0.53	0.692476	0.02267	0.0625141	0	5.8654	6.87267	7.22986	6.6997	DPY30	dpy-30 homolog (C. elegans)	84661	612032	2
8053406	-1.32	0.399634	1.63e-05	0.000162956	-1	-1.08	0.472389	0.000355818	0.000591101	-1	0.24	1.18205	0.324597	0.402469	0	0.43	1.3517	0.049846	0.0624489	0	-0.89	0.540185	0.000371562	0.0217195	0	-0.65	0.638528	0.00438214	0.0201181	0	4.90391	6.22716	5.98586	5.33869	RETSAT	retinol saturase (all-trans-retinol 13,14-reductase)	54884	NA	2
8060225	-1.05	0.48356	1e-07	8.08e-06	-1	-1.39	0.382412	1.01e-09	3.56e-08	-1	-0.34	0.790826	0.0170341	0.0369738	0	0.97	1.95849	1.49e-08	2.98e-07	0	-0.08	0.947047	0.509906	0.722469	0	-0.42	0.74895	0.000939633	0.0072144	0	7.10468	8.15292	8.49148	8.07442	HDLBP	high density lipoprotein binding protein	3069	142695	2, 2
8062206	-1.38	0.38293	0.00103385	0.00319333	-1	-1.46	0.36326	0.00105254	0.00159089	-1	-0.08	0.948633	0.835688	0.871152	0	0.89	1.85833	0.0108838	0.0152233	0	-0.49	0.711609	0.142655	0.372298	0	-0.57	0.675055	0.0801474	0.154841	0	6.68112	8.06597	8.14205	7.57512	ROMO1	reactive oxygen species modulator 1	140823	NA	20
8062349	-1.16	0.44759	7.17e-05	0.00044409	-1	-1.6	0.330069	1.68e-06	6.03e-06	-1	-0.44	0.737435	0.0729963	0.117169	0	0.86	1.81775	0.000295469	0.00059722	0	-0.3	0.813606	0.164807	0.399359	0	-0.74	0.599982	0.00110116	0.00799256	0	5.15843	6.31818	6.75759	6.02058	RPN2	ribophorin II	6185	180490	20
8063903	-1.01	0.497618	7.99e-05	0.000478613	-1	-1.24	0.422086	1.08e-05	2.79e-05	-1	-0.24	0.848213	0.261347	0.335225	0	0.9	1.86417	6.45e-05	0.000160055	0	-0.11	0.927642	0.561436	0.762084	0	-0.35	0.786837	0.0615471	0.12754	0	8.11533	9.12222	9.35973	9.01386	RPS21	ribosomal protein S21	6227	180477	20
8064522	-1.22	0.430407	1.7e-07	1.09e-05	-1	-1.2	0.436099	3.72e-07	1.87e-06	-1	0.02	1.01323	0.906026	0.928449	0	0.85	1.80242	3.54e-06	1.53e-05	0	-0.37	0.775774	0.0169462	0.126684	0	-0.35	0.786035	0.0164982	0.0500949	0	5.14491	6.36114	6.34218	5.99485	IDH3B	isocitrate dehydrogenase 3 (NAD+) beta	3420	604526	20
8066407	-1.18	0.442082	0.00031842	0.00131643	-1	-1.73	0.301312	3.86e-06	1.18e-05	-1	-0.55	0.681576	0.0519	0.0888936	0	0.94	1.91743	0.00049457	0.000931933	0	-0.24	0.84766	0.330194	0.575966	0	-0.79	0.577745	0.00195116	0.011693	0	5.17713	6.35475	6.9078	6.1163	C20orf142	chromosome 20 open reading frame 142	128486	612029	20
8067382	-1.19	0.438064	0.00152458	0.00429958	-1	-1.02	0.49329	0.00653228	0.00870416	-1	0.17	1.12607	0.599022	0.665438	0	0.67	1.59552	0.0247352	0.0325759	0	-0.52	0.698941	0.0853299	0.287972	0	-0.35	0.787054	0.214411	0.320094	0	7.04043	8.23121	8.05992	7.71446	PSMA7	proteasome (prosome, macropain) subunit, alpha type, 7	5688	606607	20
8073578	-1.27	0.414965	0.000529392	0.00191425	-1	-1.42	0.373819	0.000329576	0.000551614	-1	-0.15	0.900845	0.633312	0.696803	0	0.71	1.63095	0.0179293	0.024148	0	-0.56	0.676787	0.0536195	0.227529	0	-0.71	0.60968	0.0136353	0.0436	0	5.64211	6.91105	7.0617	6.34782	C22orf32	chromosome 22 open reading frame 32	91689	NA	22
8073645	-1.11	0.464739	0.000779389	0.00256612	-1	-1.51	0.351581	5.58e-05	0.000113519	-1	-0.4	0.756513	0.167986	0.232534	0	0.74	1.67224	0.00621938	0.00910874	0	-0.36	0.777158	0.157833	0.391662	0	-0.77	0.58793	0.00424149	0.019679	0	4.93487	6.04038	6.44294	5.67666	SAMM50	sorting and assembly machinery component 50 homolog (S. cerevisiae)	25813	612058	22
8074464	-1.17	0.44553	0.000196583	0.000922651	-1	-1.44	0.368592	3.6e-05	7.79e-05	-1	-0.27	0.827313	0.304613	0.381718	0	0.94	1.9156	0.000499188	0.000939664	0	-0.23	0.853458	0.332536	0.578077	0	-0.5	0.706077	0.0342215	0.0832387	0	6.36174	7.52814	7.80164	7.29954	UFD1L	ubiquitin fusion degradation 1 like (yeast)	7353	601754	22
8077770	-1.16	0.448836	6.34e-05	0.00040571	-1	-2	0.25016	3.25e-08	3.22e-07	-1	-0.84	0.557352	0.00128613	0.00560106	0	0.95	1.92565	9.7e-05	0.000227925	0	-0.21	0.864299	0.314992	0.560504	0	-1.05	0.481719	1.65e-05	0.000461874	-1	5.67519	6.83093	7.67427	6.62053	C3orf10	chromosome 3 open reading frame 10	55845	611183	3
8077993	-1.05	0.482022	8.98e-05	0.000523892	-1	-1.44	0.369598	2.4e-06	8.03e-06	-1	-0.38	0.766765	0.0889615	0.1377	0	0.94	1.92097	5.11e-05	0.000131496	0	-0.11	0.925949	0.569738	0.766407	0	-0.49	0.709986	0.0124434	0.0409202	0	5.17442	6.22725	6.61039	6.11625	TMEM43	transmembrane protein 43	79188	604400, 612048	3
8078252	-1.16	0.448025	2.89e-05	0.000238223	-1	-1.4	0.379864	4.21e-06	1.27e-05	-1	-0.24	0.847862	0.284152	0.359414	0	0.95	1.93578	6.22e-05	0.000155207	0	-0.21	0.86728	0.302187	0.54911	0	-0.44	0.735334	0.0250156	0.0670869	0	4.73545	5.8938	6.1319	5.68837	UBE2E2	ubiquitin-conjugating enzyme E2E 2 (UBC4/5 homolog, yeast)	7325	602163	3
8078905	-1.02	0.494738	0.00871704	0.0172713	-1	-1.43	0.370373	0.000760002	0.00118375	-1	-0.42	0.748624	0.239761	0.311818	0	0.98	1.96598	0.00439198	0.00661551	0	-0.04	0.972643	0.898436	0.956076	0	-0.46	0.728144	0.133104	0.224634	0	7.98618	9.00144	9.41913	8.96143	RPSA	ribosomal protein SA	3921	150370	3, 3
8081241	-1.16	0.447005	0.000478292	0.00178012	-1	-1.13	0.455426	0.00104492	0.00157981	-1	0.03	1.01884	0.924522	0.943599	0	0.81	1.75815	0.00373166	0.00569703	0	-0.35	0.7859	0.179505	0.418366	0	-0.32	0.800707	0.195661	0.298961	0	4.83484	5.99648	5.96955	5.6489	C3orf26	chromosome 3 open reading frame 26	84319	NA	3
8089795	-1.81	0.285238	2.15e-06	4.47e-05	-1	-1.82	0.282484	5.02e-06	1.47e-05	-1	-0.01	0.990347	0.961126	0.971345	0	0.73	1.6565	0.00870559	0.0123988	0	-1.08	0.472497	0.000295038	0.018971	-1	-1.1	0.467936	0.000173968	0.00233201	-1	5.70406	7.51382	7.52782	6.4322	COX17	COX17 cytochrome c oxidase assembly homolog (S. cerevisiae)	10063	604813	3
8101881	-1.31	0.403895	0.00295054	0.00719757	-1	-1.45	0.36511	0.000201347	0.000353903	-1	-0.15	0.903973	0.680833	0.738972	0	0.69	1.61153	0.0162933	0.0221299	0	-0.62	0.65089	0.0700775	0.261878	0	-0.77	0.588387	0.00734687	0.0284782	0	4.23877	5.54672	5.69237	4.92721	ADH1B	alcohol dehydrogenase 1B (class I), beta polypeptide	125	103720, 103780	4
8109194	-1.03	0.490235	0.027588	0.0450298	-1	-1.14	0.455326	0.0222222	0.0275003	-1	-0.11	0.928792	0.807092	0.846997	0	0.86	1.81431	0.034481	0.0444157	0	-0.17	0.88944	0.663689	0.825251	0	-0.28	0.826105	0.461381	0.565081	0	4.27712	5.30557	5.41215	5.13654	SLC26A2	solute carrier family 26 (sulfate transporter), member 2	1836	222600, 226900, 256050, 600972, 606718	5
8109344	-1.02	0.491586	7.23e-05	0.0004451	-1	-1.9	0.267389	9.21e-09	1.39e-07	-1	-0.88	0.543932	0.000278149	0.00189791	0	0.75	1.68456	0.000270396	0.00055226	0	-0.27	0.828105	0.148905	0.379413	0	-1.15	0.450433	7.96e-07	5.61e-05	-1	5.47336	6.49785	7.37635	6.22574	GM2A	GM2 ganglioside activator	2760	272750	5
8109750	-1.11	0.461694	0.000252383	0.00110751	-1	-1.11	0.463786	0.000437465	0.000712021	-1	0.01	1.00453	0.979582	0.985805	0	0.68	1.60604	0.00622148	0.0091089	0	-0.43	0.741497	0.0693383	0.260326	0	-0.42	0.744857	0.0606273	0.126184	0	9.53039	10.6454	10.6389	10.2139	RPLP0	ribosomal protein, large, P0	NA	NA
8114628	-1.07	0.476582	3.24e-06	5.83e-05	-1	-1.57	0.337524	1.59e-08	2.02e-07	-1	-0.5	0.70822	0.007936	0.020863	0	0.89	1.84827	4.75e-06	1.93e-05	0	-0.18	0.880852	0.238841	0.485455	0	-0.68	0.623836	0.000102166	0.00161186	0	4.90953	5.97873	6.47646	5.7957	HARS	histidyl-tRNA synthetase	3035	142810	5
8115346	-1.3	0.404765	0.000849422	0.00274912	-1	-1.05	0.481445	0.00576651	0.0077304	-1	0.25	1.18944	0.453458	0.53002	0	0.79	1.72985	0.010927	0.015276	0	-0.51	0.700181	0.0939946	0.299975	0	-0.26	0.832825	0.347119	0.459032	0	6.5024	7.80725	7.55696	7.29305	ATOX1	ATX1 antioxidant protein 1 homolog (yeast)	475	602270	5
8116610	-1.12	0.459665	7.6e-07	2.39e-05	-1	-1.2	0.436336	1.15e-06	4.45e-06	-1	-0.08	0.949248	0.656112	0.717699	0	0.98	1.97791	7.98e-07	4.93e-06	0	-0.14	0.909174	0.354924	0.598609	0	-0.21	0.863032	0.151558	0.247414	0	5.3842	6.50554	6.58069	6.36817	NQO2	NAD(P)H dehydrogenase, quinone 2	4835	160998	6
8125919	-1.5	0.354047	0.000201092	0.000939162	-1	-1.78	0.291709	3.77e-05	8.11e-05	-1	-0.28	0.823928	0.403392	0.481646	0	0.77	1.70676	0.0137552	0.0189202	0	-0.73	0.604273	0.0216784	0.143355	0	-1.01	0.497877	0.00143223	0.00956123	-1	5.74533	7.24332	7.52273	6.51659	FKBP5	FK506 binding protein 5	2289	602623, 608516	6
8126646	-1.05	0.481968	6.08e-05	0.000395862	-1	-1.17	0.445089	1.85e-05	4.42e-05	-1	-0.11	0.923482	0.582129	0.650373	0	0.44	1.35397	0.0238953	0.0315534	0	-0.62	0.652572	0.00310387	0.0559685	0	-0.73	0.602639	0.000325649	0.00358115	0	5.77348	6.82647	6.94131	6.21068	MRPS18A	mitochondrial ribosomal protein S18A	55168	611981	6
8128322	-1.07	0.475972	0.00197303	0.00523475	-1	-1.67	0.315158	2.8e-05	6.3e-05	-1	-0.59	0.662136	0.0589951	0.0985446	0	0.89	1.85344	0.00256541	0.0040477	0	-0.18	0.882186	0.504915	0.718182	0	-0.78	0.584127	0.00555783	0.0236179	0	4.17591	5.24697	5.84177	5.06612	C6orf66	chromosome 6 open reading frame 66	29078	252010, 611776	6
8133114	-1.34	0.396021	7.65e-05	0.000463184	-1	-1.58	0.334298	6.75e-06	1.86e-05	-1	-0.24	0.844141	0.361173	0.439413	0	0.64	1.56291	0.00737669	0.0106533	0	-0.69	0.618944	0.00762105	0.0867768	0	-0.94	0.522476	0.00023859	0.0029075	0	3.59312	4.92947	5.17391	4.23735	VKORC1L1	vitamin K epoxide reductase complex, subunit 1-like 1	154807	608838	7
8136602	-1.19	0.437198	4.74e-05	0.000335733	-1	-1.16	0.446019	9.56e-05	0.000182203	-1	0.03	1.02017	0.90207	0.925611	0	0.99	1.98295	7.69e-05	0.000186676	0	-0.21	0.866944	0.331293	0.576651	0	-0.18	0.884434	0.375142	0.485977	0	6.53896	7.7326	7.70379	7.52661	NDUFB2	NADH dehydrogenase (ubiquinone) 1 beta subcomplex, 2, 8kDa	4708	603838	7
8136849	-1.1	0.465633	4.22e-06	6.9e-05	-1	-1.18	0.441194	2.65e-06	8.69e-06	-1	-0.08	0.947516	0.666617	0.726138	0	0.78	1.71697	3.87e-05	0.000104019	0	-0.32	0.799478	0.0530309	0.225997	0	-0.4	0.757518	0.0136694	0.0436264	0	4.47433	5.57707	5.65484	5.2542	GSTK1	glutathione S-transferase kappa 1	373156	602321	7
8138640	-1.08	0.4723	3.58e-06	6.18e-05	-1	-1.15	0.45114	2.55e-06	8.44e-06	-1	-0.07	0.955199	0.705644	0.760015	0	0.68	1.59725	0.000148704	0.000327719	0	-0.41	0.754383	0.0144821	0.118792	0	-0.47	0.720586	0.00358934	0.0174766	0	6.10948	7.19171	7.25784	6.78508	CYCS	cytochrome c, somatic	54205	123970, 612004	7
8138773	-1.18	0.44269	2.73e-07	1.39e-05	-1	-1.03	0.490181	6.55e-06	1.82e-05	-1	0.15	1.10728	0.374679	0.453356	0	0.9	1.864	2.1e-06	1.01e-05	0	-0.28	0.825175	0.0642321	0.249437	0	-0.13	0.913699	0.358739	0.470979	0	6.18699	7.36262	7.2156	7.08539	EIF4H	eukaryotic translation initiation factor 4H	7458	603431	7
8138776	-1.24	0.42386	7.81e-06	0.0001008	-1	-1.19	0.438103	2.16e-05	5.05e-05	-1	0.05	1.0336	0.82189	0.859556	0	0.94	1.91499	3.06e-05	8.55e-05	0	-0.3	0.811689	0.119151	0.338053	0	-0.25	0.838964	0.164066	0.262449	0	4.53681	5.77515	5.72747	5.47415	HIBADH	3-hydroxyisobutyrate dehydrogenase	11112	608475	7
8141295	-1.33	0.398057	7.56e-05	0.00046047	-1	-1.59	0.331782	1.87e-05	4.45e-05	-1	-0.26	0.833503	0.346148	0.424234	0	0.99	1.98224	0.000561693	0.00103925	0	-0.34	0.789044	0.173717	0.410321	0	-0.6	0.657671	0.0170865	0.051297	0	6.74005	8.069	8.33174	7.72718	ATP5J2	ATP synthase, H+ transporting, mitochondrial F0 complex, subunit F2	9551	NA	7
8141717	-1.25	0.419038	0.000152568	0.000768179	-1	-1.12	0.46116	0.000892599	0.00136998	-1	0.14	1.10052	0.616636	0.681473	0	0.76	1.68888	0.00517286	0.00768268	0	-0.5	0.707705	0.0523001	0.224963	0	-0.36	0.778843	0.13537	0.227022	0	5.63589	6.89073	6.75255	6.39195	FIS1	fission 1 (mitochondrial outer membrane) homolog (S. cerevisiae)	51024	609003	7
8143035	-1	0.498548	0.000698903	0.00235213	-1	-1.37	0.386217	3.15e-05	6.97e-05	-1	-0.37	0.774685	0.153243	0.216026	0	0.96	1.94942	0.000220423	0.000461668	0	-0.04	0.971876	0.855152	0.932785	0	-0.41	0.752898	0.0641841	0.131426	0	6.95882	7.96301	8.33133	7.92186	EEF1G	eukaryotic translation elongation factor 1 gamma	NA	NA
8143108	-1.16	0.446862	0.011939	0.0222986	-1	-1.51	0.35093	0.00191417	0.00276294	-1	-0.35	0.785321	0.403624	0.481819	0	0.95	1.93057	0.014246	0.0195558	0	-0.21	0.862698	0.568829	0.765559	0	-0.56	0.677495	0.114949	0.201569	0	5.18116	6.34326	6.6919	6.13019	---	---	NA	NA
8144669	-1.1	0.46544	0.00727207	0.0148447	-1	-2.08	0.235762	1.62e-05	3.94e-05	-1	-0.98	0.506534	0.0126324	0.0295053	0	0.93	1.90719	0.00694457	0.0100852	0	-0.17	0.887683	0.600856	0.786271	0	-1.15	0.449642	0.000946778	0.00724229	-1	5.81033	6.91366	7.89493	6.74178	FDFT1	farnesyl-diphosphate farnesyltransferase 1	2222	184420	8
8152703	-1.02	0.493594	0.00120948	0.00361122	-1	-1.05	0.482709	0.00151263	0.00222239	-1	-0.03	0.977947	0.906711	0.929064	0	0.73	1.6594	0.00598126	0.00878424	0	-0.29	0.819072	0.245844	0.491826	0	-0.32	0.801009	0.180366	0.281252	0	4.42928	5.44788	5.48005	5.15994	FBXO32	F-box protein 32	114907	606604	8, 8
8157582	-1.02	0.492417	0.00192886	0.00514631	-1	-1.14	0.452584	0.00100899	0.00153142	-1	-0.12	0.919107	0.673039	0.731747	0	0.53	1.44733	0.0446052	0.0564132	0	-0.49	0.712691	0.0676558	0.256485	0	-0.61	0.655039	0.0188625	0.0548455	0	6.08228	7.10432	7.22602	6.61567	GSN	gelsolin (amyloidosis, Finnish type)	2934	105120, 137350	9, 9
8158059	-1.49	0.3564	7.29e-08	7.31e-06	-1	-1.11	0.46256	1.21e-05	3.07e-05	-1	0.38	1.29787	0.0554361	0.0938327	0	0.94	1.91476	7.68e-06	2.81e-05	0	-0.55	0.682419	0.00293635	0.0550588	0	-0.18	0.88569	0.278172	0.38819	0	5.21643	6.70487	6.32872	6.15359	STXBP1	syntaxin binding protein 1	6812	602926, 612164	9
8160036	-1.03	0.491409	0.00028264	0.00120332	-1	-1.37	0.387269	1.55e-05	3.81e-05	-1	-0.34	0.788078	0.15572	0.218789	0	0.58	1.49705	0.00963645	0.0135988	0	-0.44	0.735663	0.0449996	0.209137	0	-0.79	0.57976	0.000644152	0.00560161	0	5.75476	6.77976	7.12335	6.33688	C9orf123	chromosome 9 open reading frame 123	90871	NA	9
8160297	-1.82	0.282663	0.000156022	0.000781255	-1	-1.92	0.264204	0.000132604	0.000243858	-1	-0.1	0.934698	0.806086	0.846266	0	0.67	1.59273	0.0589516	0.0728712	0	-1.15	0.450204	0.00318365	0.0565862	0	-1.25	0.420805	0.00100839	0.00756014	-1	5.01024	6.83309	6.93051	5.68174	ADFP	adipose differentiation-related protein	123	103195	9
8160839	-1.25	0.420334	3.41e-06	6.08e-05	-1	-1.83	0.280887	1.15e-08	1.62e-07	-1	-0.58	0.668247	0.00753599	0.0200493	0	0.97	1.95419	1.21e-05	3.99e-05	0	-0.28	0.821411	0.123302	0.345061	0	-0.87	0.548905	3.12e-05	0.000714351	0	5.84923	7.09962	7.68117	6.8158	DCTN3	dynactin 3 (p22)	11258	607387	9
8160914	-1.31	0.404087	2.93e-05	0.000239528	-1	-2.04	0.243068	6.49e-08	5.19e-07	-1	-0.73	0.601524	0.00635048	0.0177265	0	0.99	1.99128	0.000110359	0.000255309	0	-0.31	0.80465	0.163223	0.397458	0	-1.05	0.484016	3.93e-05	0.00084193	-1	4.44343	5.75069	6.48399	5.43712	VCP	valosin-containing protein	7415	167320, 601023	9
8162276	-1.03	0.488685	6.13e-05	0.000396697	-1	-1.52	0.348979	3.78e-07	1.89e-06	-1	-0.49	0.714118	0.0256086	0.0510769	0	0.86	1.81475	6.65e-05	0.000164369	0	-0.17	0.886842	0.350677	0.595129	0	-0.66	0.63331	0.000800463	0.0064527	0	4.88927	5.9223	6.40806	5.74904	NFIL3	nuclear factor, interleukin 3 regulated	4783	605327	9
8163733	-1.07	0.47673	1.34e-07	9.37e-06	-1	-1.05	0.484386	9.69e-07	3.92e-06	-1	0.02	1.01606	0.873919	0.902486	0	0.96	1.94474	2.98e-07	2.41e-06	0	-0.11	0.927115	0.401226	0.63966	0	-0.09	0.942003	0.499128	0.599809	0	4.9629	6.03165	6.00867	5.92247	CDK5RAP2	CDK5 regulatory subunit associated protein 2	55755	604804, 608201	9
8163775	-1.1	0.467753	1.1e-05	0.000125975	-1	-2.07	0.238949	2.76e-10	1.69e-08	-1	-0.97	0.510846	2.91e-05	0.000432732	0	0.87	1.83242	6.29e-06	2.39e-05	0	-0.22	0.857117	0.190169	0.42834	0	-1.19	0.437855	6.64e-08	8.35e-06	-1	4.73567	5.83186	6.8009	5.60942	MEGF9	multiple EGF-like-domains 9	1955	604268	9
8164067	-1.18	0.43998	0.000808227	0.00263881	-1	-1.92	0.264243	4.15e-06	1.25e-05	-1	-0.74	0.60058	0.0220955	0.0453826	0	0.89	1.85567	0.00259431	0.00409153	0	-0.29	0.816458	0.285427	0.532546	0	-1.03	0.490348	0.000504452	0.0047618	-1	6.64878	7.83327	8.56884	7.54072	PSMB7	proteasome (prosome, macropain) subunit, beta type, 7	5695	604030	9
8164210	-1.19	0.438919	0.000435037	0.00165519	-1	-1.31	0.403479	0.000186713	0.000330885	-1	-0.12	0.919256	0.666903	0.726304	0	0.99	1.98202	0.000463031	0.000880395	0	-0.2	0.869947	0.428748	0.660835	0	-0.32	0.799704	0.179734	0.280627	0	5.15464	6.34262	6.46408	6.14162	RPL12	ribosomal protein L12	6136	180475	9
8165995	-1.16	0.448203	0.00184481	0.004962	-1	-1.74	0.299749	5e-05	0.000103339	-1	-0.58	0.668781	0.0867717	0.134922	0	0.85	1.80576	0.00690563	0.0100339	0	-0.31	0.809348	0.300683	0.546974	0	-0.89	0.541276	0.00403292	0.0190099	0	4.42179	5.57957	6.15996	5.2744	HCCS	holocytochrome c synthase (cytochrome c heme-lyase)	3052	300056, 309801	X
8166219	-1.02	0.494637	3.76e-05	0.000284487	-1	-1.4	0.379376	1.55e-07	9.75e-07	-1	-0.38	0.766978	0.0497522	0.0857117	0	0.95	1.9314	2.71e-06	1.24e-05	0	-0.07	0.955342	0.698351	0.845462	0	-0.45	0.732727	0.00601128	0.0248522	0	4.8906	5.90616	6.2889	5.84025	SYAP1	synapse associated protein 1, SAP47 homolog (Drosophila)	94056	NA	X
8166230	-1.14	0.454244	3.03e-08	4.28e-06	-1	-1.14	0.453232	7.25e-08	5.67e-07	-1	0	0.997772	0.981262	0.98686	0	0.95	1.92629	1.01e-07	1.12e-06	0	-0.19	0.875006	0.127114	0.35139	0	-0.2	0.873056	0.105602	0.190203	0	4.7234	5.86186	5.86508	5.66923	CXorf15	chromosome X open reading frame 15	55787	300677	X
8179055	-1	0.499692	0.000573144	0.00202663	-1	-1.32	0.400366	6.71e-05	0.000133461	-1	-0.32	0.801226	0.213602	0.283129	0	0.94	1.92098	0.000369152	0.000722766	0	-0.06	0.959897	0.792267	0.89893	0	-0.38	0.769095	0.0923318	0.171792	0	4.90366	5.90455	6.22427	5.8455	ZNRD1	zinc ribbon domain containing 1	30834	607525	6, 6_cox_hap1, 6_qbl_hap2
7896721	-3.53	0.0866154	1.6e-06	3.7e-05	-1	-2.45	0.182648	0.0003857	0.000634856	-1	1.08	2.10872	0.0606587	0.10083	0	3.4	10.5498	5.79e-07	3.89e-06	1	-0.13	0.913773	0.790936	0.898724	0	0.95	1.92689	0.0559308	0.118922	0	4.61595	8.14518	7.06882	8.01509	---	---	NA	NA
7896748	-1.84	0.280262	4.6e-05	0.000329394	-1	-2.06	0.239016	1.59e-05	3.89e-05	-1	-0.23	0.852831	0.524346	0.597106	0	1.66	3.15112	3.04e-05	8.53e-05	1	-0.18	0.883138	0.580288	0.772635	0	-0.41	0.753168	0.188238	0.290462	0	4.86695	6.7021	6.93177	6.52281	---	---	NA	NA
7897078	-1.34	0.395502	0.000127953	0.000673401	-1	-1.98	0.254263	1.12e-06	4.38e-06	-1	-0.64	0.642886	0.0339035	0.0634371	0	1.2	2.29552	7.24e-05	0.00017712	1	-0.14	0.907882	0.585818	0.776713	0	-0.78	0.583665	0.00348034	0.0171272	0	5.62247	6.96071	7.59808	6.82129	RER1	RER1 retention in endoplasmic reticulum 1 homolog (S. cerevisiae)	11079	NA	1
7897404	-1.43	0.371029	8.85e-07	2.67e-05	-1	-1.48	0.358247	8.51e-07	3.55e-06	-1	-0.05	0.965549	0.80951	0.849371	0	1.32	2.49031	2.74e-07	2.27e-06	1	-0.11	0.923979	0.544582	0.748301	0	-0.16	0.892147	0.356359	0.468361	0	7.14943	8.57982	8.6304	8.46575	PARK7	Parkinson disease (autosomal recessive, early onset) 7	11315	602533, 606324	1
7897663	-1.1	0.464925	9.19e-05	0.000531725	-1	-1.44	0.367507	1.01e-05	2.64e-05	-1	-0.34	0.790465	0.161312	0.224911	0	1.36	2.57524	1.39e-06	7.47e-06	1	0.26	1.19729	0.220857	0.464848	0	-0.08	0.946419	0.698221	0.77187	0	6.95885	8.06378	8.40301	8.32356	TARDBP	TAR DNA binding protein	23435	605078, 612069	1
7898211	-1.43	0.370404	5.87e-06	8.36e-05	-1	-1.73	0.300762	8.23e-07	3.47e-06	-1	-0.3	0.811984	0.222855	0.293392	0	1.22	2.33139	8.38e-06	3.01e-05	1	-0.21	0.863554	0.331703	0.576996	0	-0.51	0.701193	0.0199553	0.0571025	0	4.44213	5.87496	6.17543	5.66332	DDI2	DDI1, DNA-damage inducible 1, homolog 2 (S. cerevisiae)	84301	NA	1
7898833	-1.43	0.372356	1.65e-06	3.78e-05	-1	-2.15	0.225925	6.26e-09	1.08e-07	-1	-0.72	0.606746	0.00337324	0.0110963	0	1.91	3.74741	2.49e-09	9.25e-08	1	0.48	1.39537	0.0227293	0.14758	0	-0.24	0.846635	0.216959	0.322796	0	4.76213	6.18738	6.90821	6.66803	AOF2	amine oxidase (flavin containing) domain 2	23028	609132	1
7898910	-2.42	0.186913	1.27e-06	3.26e-05	-1	-2.96	0.128737	1.17e-07	7.9e-07	-1	-0.54	0.688755	0.151785	0.214363	0	2.58	5.97764	4.78e-08	6.78e-07	1	0.16	1.1173	0.625039	0.801537	0	-0.38	0.769547	0.232371	0.339851	0	5.26575	7.68531	8.22325	7.84533	PNRC2	proline-rich nuclear receptor coactivator 2	55629	611882	1
7899016	-1.55	0.342421	0.00102201	0.00316836	-1	-2.11	0.231627	5.68e-05	0.000115336	-1	-0.56	0.676439	0.173	0.23817	0	1.64	3.11506	0.000136851	0.000306165	1	0.09	1.06666	0.797903	0.901898	0	-0.47	0.721532	0.179764	0.280634	0	5.21921	6.76536	7.32933	6.85847	SDHD	succinate dehydrogenase complex, subunit D, integral membrane protein	6392	114900, 168000, 171300, 602690, 606864, 612359	11
7899455	-1.51	0.351765	9.3e-07	2.74e-05	-1	-2.5	0.176677	3.68e-10	1.99e-08	-1	-0.99	0.50226	0.00017649	0.00139977	0	1.86	3.61999	4.45e-09	1.34e-07	1	0.35	1.27339	0.0934921	0.299472	0	-0.64	0.639571	0.00247442	0.0137648	0	4.40677	5.91408	6.90758	6.26275	PHACTR4	phosphatase and actin regulator 4	65979	608726	1, 1
7899737	-1.79	0.288193	9.31e-07	2.74e-05	-1	-2.62	0.16287	4.71e-09	9.12e-08	-1	-0.82	0.565142	0.00506847	0.0150064	0	1.41	2.6547	4.56e-06	1.86e-05	1	-0.39	0.765067	0.114788	0.331945	0	-1.21	0.432371	2.17e-05	0.000549596	-1	5.16112	6.95601	7.77933	6.56967	EIF3I	eukaryotic translation initiation factor 3, subunit I	8668	603911	1
7899813	-1.38	0.38388	0.000221998	0.00101069	-1	-2.01	0.249077	4.32e-06	1.3e-05	-1	-0.62	0.648841	0.0565445	0.0953399	0	1.77	3.40845	1.74e-06	8.81e-06	1	0.39	1.30844	0.173937	0.410649	0	-0.24	0.848967	0.381569	0.491507	0	4.19787	5.57914	6.2032	5.96698	RBBP4	retinoblastoma binding protein 4	5928	602923	1, 1
7899957	-1.22	0.430577	3.53e-05	0.000273585	-1	-1.92	0.264917	1.75e-07	1.06e-06	-1	-0.7	0.61526	0.00723766	0.0194912	0	1.9	3.72378	6.64e-09	1.77e-07	1	0.68	1.60337	0.00349812	0.059468	0	-0.02	0.986491	0.924146	0.948247	0	5.24287	6.45853	7.15926	7.13964	ZMYM4	zinc finger, MYM-type 4	9202	NA	1
7900119	-1.03	0.489828	4.21e-07	1.74e-05	-1	-1.64	0.320706	4.61e-10	2.23e-08	-1	-0.61	0.654731	0.000358404	0.0022672	0	1.08	2.10966	2.3e-08	4.07e-07	1	0.05	1.03337	0.71546	0.857014	0	-0.56	0.676579	0.0001585	0.00218758	0	5.45604	6.4857	7.09672	6.53305	THRAP3	thyroid hormone receptor associated protein 3	9967	603809	1
7900228	-1.29	0.41032	3.22e-05	0.000256381	-1	-1.97	0.255403	1.22e-07	8.17e-07	-1	-0.68	0.622448	0.00994989	0.0245568	0	1.41	2.65691	1.63e-06	8.4e-06	1	0.12	1.09018	0.573827	0.768877	0	-0.56	0.678581	0.0128578	0.0418525	0	7.6731	8.95828	9.64226	9.08285	NDUFS5	NADH dehydrogenase (ubiquinone) Fe-S protein 5, 15kDa (NADH-coenzyme Q reductase)	4725	603847	1
7900382	-1.95	0.259213	8.79e-10	5.34e-07	-1	-2.59	0.166538	2.18e-11	3.72e-09	-1	-0.64	0.642476	0.00324753	0.010767	0	1.95	3.86599	2.22e-10	1.9e-08	1	0	1.00212	0.986093	0.993024	0	-0.64	0.643835	0.00104502	0.00774973	0	6.0687	8.01648	8.65477	8.01953	CAP1	CAP, adenylate cyclase-associated protein 1 (yeast)	10487	NA	1
7901299	-1.55	0.34229	5.09e-05	0.000351853	-1	-1.6	0.329418	6.96e-05	0.000137876	-1	-0.06	0.962395	0.85834	0.88988	0	1.51	2.85593	1.28e-05	4.19e-05	1	-0.03	0.977557	0.905291	0.958425	0	-0.09	0.940796	0.739562	0.804292	0	5.15643	6.70314	6.75843	6.67039	CMPK1	cytidine monophosphate (UMP-CMP) kinase 1, cytosolic	51727	191710	1
7901788	-1.23	0.425701	0.000263654	0.00114334	-1	-1.67	0.313993	1.21e-05	3.08e-05	-1	-0.44	0.737591	0.130701	0.190142	0	1.27	2.40491	3.61e-05	9.82e-05	1	0.03	1.02377	0.89299	0.952787	0	-0.41	0.755125	0.101885	0.185092	0	5.63612	6.86821	7.30732	6.9021	NFIA	nuclear factor I/A	4774	600727	1, 1, 1
7902345	-2.01	0.24879	6.75e-06	9.05e-05	-1	-2.66	0.158316	1.87e-07	1.12e-06	-1	-0.65	0.636342	0.0654002	0.107416	0	2.22	4.65929	1.79e-07	1.67e-06	1	0.21	1.15919	0.486213	0.70668	0	-0.44	0.737639	0.138118	0.230429	0	4.71165	6.71865	7.37078	6.93176	TYW3	tRNA-yW synthesizing protein 3 homolog (S. cerevisiae)	127253	611245	1
7902495	-1.54	0.343549	0.000901676	0.00287155	-1	-1.5	0.352586	0.00186425	0.00269552	-1	0.04	1.02631	0.925839	0.944502	0	1.85	3.60259	2.73e-05	7.78e-05	1	0.31	1.23767	0.393673	0.634321	0	0.35	1.27023	0.319752	0.431748	0	5.47209	7.01351	6.97605	7.32113	NEXN	nexilin (F actin binding protein)	91624	NA	1
7902512	-1.12	0.461594	0.00181595	0.00489642	-1	-2.11	0.232055	2.77e-06	8.99e-06	-1	-0.99	0.502726	0.00451696	0.0138189	0	1.89	3.70089	6.87e-07	4.43e-06	1	0.77	1.70831	0.01068	0.102171	0	-0.22	0.858811	0.422203	0.529863	0	4.07964	5.19494	6.1871	5.96751	DNAJB4	DnaJ (Hsp40) homolog, subfamily B, member 4	11080	611327	1
7902634	-1.35	0.392743	2.62e-05	0.000222829	-1	-1.96	0.257602	3.45e-07	1.77e-06	-1	-0.61	0.655907	0.0255861	0.0510554	0	1.64	3.1173	2.69e-07	2.24e-06	1	0.29	1.2243	0.208519	0.450885	0	-0.32	0.803024	0.160157	0.258096	0	5.51167	6.86001	7.46845	7.15197	BXDC5	brix domain containing 5	80135	NA	1
7902771	-1.17	0.445028	0.00386146	0.0089238	-1	-2	0.249808	3e-05	6.69e-05	-1	-0.83	0.561331	0.0294591	0.0568031	0	1.42	2.68351	0.000176558	0.000380373	1	0.26	1.19423	0.429795	0.661658	0	-0.58	0.670361	0.0717403	0.142684	0	5.96522	7.13325	7.96633	7.38934	SH3GLB1	SH3-domain GRB2-like endophilin B1	51100	609287	1
7902789	-1.05	0.484639	1.74e-05	0.00017003	-1	-1.6	0.330307	5.62e-08	4.67e-07	-1	-0.55	0.681553	0.007478	0.0199565	0	1.17	2.24634	3.89e-07	2.93e-06	1	0.12	1.08866	0.471975	0.695867	0	-0.43	0.741981	0.0127718	0.0416865	0	4.32683	5.37185	5.92495	5.49441	HS2ST1	heparan sulfate 2-O-sulfotransferase 1	9653	604844	1, 1
7903092	-2.02	0.247159	1.16e-05	0.000130465	-1	-2.2	0.217578	6.35e-06	1.77e-05	-1	-0.18	0.880317	0.606545	0.672224	0	2.36	5.12346	1.21e-07	1.29e-06	1	0.34	1.26631	0.28926	0.536187	0	0.16	1.11475	0.604238	0.694442	0	5.09559	7.11207	7.29598	7.4527	FNBP1L	formin binding protein 1-like	54874	608848	1
7903227	-1.45	0.365839	2.47e-05	0.000215268	-1	-2.02	0.246967	5.6e-07	2.58e-06	-1	-0.57	0.67507	0.0482558	0.083648	0	1.57	2.96915	1.69e-06	8.63e-06	1	0.12	1.08623	0.626868	0.802659	0	-0.45	0.733283	0.0671624	0.135803	0	5.91259	7.36331	7.9302	7.48264	PALMD	palmdelphin	54873	610182	1
7903582	-1.01	0.496247	0.000638686	0.00220476	-1	-1.97	0.256129	1.74e-07	1.06e-06	-1	-0.95	0.516132	0.000879844	0.00425933	0	1.14	2.19954	3.67e-05	9.94e-05	1	0.13	1.09151	0.577284	0.771053	0	-0.83	0.563366	0.000702822	0.00592969	0	8.71783	9.72871	10.6829	9.85504	RPL17	ribosomal protein L17	6139	603661	18
7903742	-1.27	0.414837	0.00161106	0.00449638	-1	-1.14	0.455042	0.0062068	0.0082861	-1	0.13	1.09692	0.706854	0.761168	0	1.18	2.26196	0.00102861	0.00178443	1	-0.09	0.938344	0.771136	0.887721	0	0.04	1.02929	0.890674	0.921529	0	5.21074	6.48013	6.34667	6.38832	GSTM4	glutathione S-transferase mu 4	2948	138333	1, 1
7903753	-1.41	0.375033	5.89e-05	0.00038948	-1	-1.44	0.368508	0.00011186	0.000209589	-1	-0.03	0.982602	0.930093	0.948046	0	1.7	3.24037	8.4e-07	5.12e-06	1	0.28	1.21525	0.276175	0.523815	0	0.26	1.1941	0.305939	0.417774	0	5.99553	7.41044	7.43576	7.69169	GSTM2	glutathione S-transferase mu 2 (muscle)	2946	138380	1, 1
7903803	-1.18	0.441923	1.73e-05	0.000169119	-1	-1.67	0.314322	1.96e-07	1.16e-06	-1	-0.49	0.71126	0.029895	0.0573816	0	1.06	2.08798	8.59e-06	3.06e-05	1	-0.12	0.922727	0.544564	0.748301	0	-0.61	0.656299	0.00259606	0.0142672	0	5.0397	6.21784	6.70939	6.10181	AHCYL1	S-adenosylhomocysteine hydrolase-like 1	10768	607826	1
7904254	-2.18	0.220103	9.6e-07	2.79e-05	-1	-2.54	0.171391	2.2e-07	1.25e-06	-1	-0.36	0.778686	0.27554	0.350062	0	2.11	4.32378	2.68e-07	2.24e-06	1	-0.07	0.951676	0.806842	0.905936	0	-0.43	0.741057	0.132171	0.223439	0	6.78117	8.96492	9.32581	8.89346	ATP1A1	ATPase, Na+/K+ transporting, alpha 1 polypeptide	476	182310	1
7904469	-1.2	0.434679	0.0001946	0.000915309	-1	-1.87	0.272727	1.28e-06	4.85e-06	-1	-0.67	0.627422	0.019346	0.0409272	0	1.38	2.59705	7.31e-06	2.7e-05	1	0.17	1.12888	0.469132	0.693734	0	-0.5	0.708287	0.0395774	0.0925193	0	5.04416	6.24613	6.91862	6.42103	SRGAP2	SLIT-ROBO Rho GTPase activating protein 2	23380	606524	1, 1
7904478	-1.28	0.412375	1.03e-05	0.000121117	-1	-1.58	0.335287	6.79e-07	3e-06	-1	-0.3	0.813064	0.1857	0.252723	0	1.51	2.84441	8.28e-08	9.8e-07	1	0.23	1.17296	0.25459	0.502241	0	-0.07	0.953694	0.71363	0.784187	0	4.94983	6.2278	6.52636	6.45796	LOC51152	melanoma antigen	51152	NA
7904482	-1.26	0.418631	0.00149608	0.00423231	-1	-2.16	0.222985	4.96e-06	1.46e-05	-1	-0.91	0.532652	0.0139296	0.031828	0	1.72	3.28715	9.09e-06	3.2e-05	1	0.46	1.3761	0.143693	0.373622	0	-0.45	0.732985	0.134515	0.226247	0	5.43712	6.69337	7.60211	7.15396	SRGAP2	SLIT-ROBO Rho GTPase activating protein 2	23380	606524	1, 1
7904695	-1.07	0.476575	0.0102203	0.0196238	-1	-1.85	0.277474	0.000145083	0.000264186	-1	-0.78	0.582225	0.0503844	0.0866371	0	1.14	2.19875	0.00249581	0.00394987	1	0.07	1.04787	0.842279	0.924178	0	-0.71	0.610094	0.0372642	0.0884933	0	5.23019	6.29942	7.07977	6.36687	SEC22B	SEC22 vesicle trafficking protein homolog B (S. cerevisiae)	9554	604029	1
7904702	-1.01	0.49633	7.84e-06	0.000100865	-1	-1.61	0.328406	2.02e-08	2.38e-07	-1	-0.6	0.661669	0.00251569	0.00889072	0	1.28	2.42482	2.97e-08	4.87e-07	1	0.27	1.20351	0.0964837	0.304816	0	-0.33	0.796327	0.039258	0.0919529	0	6.3116	7.32223	7.91805	7.58948	NOTCH2NL	Notch homolog 2 (Drosophila) N-terminal like	388677	NA	1
7904726	-1.24	0.424064	0.000183422	0.000875923	-1	-2.04	0.242436	4.62e-07	2.21e-06	-1	-0.81	0.571697	0.00719048	0.0194072	0	1.78	3.43533	2.19e-07	1.93e-06	1	0.54	1.4568	0.0359047	0.186767	0	-0.26	0.832848	0.267886	0.377645	0	8.38655	9.6242	10.4309	10.167	TXNIP	thioredoxin interacting protein	10628	606599	1
7904830	-1	0.499174	2.45e-05	0.000214921	-1	-1.34	0.393988	1.17e-06	4.51e-06	-1	-0.34	0.78928	0.0838008	0.131142	0	1.33	2.51231	7.61e-08	9.35e-07	1	0.33	1.25408	0.0639582	0.248668	0	-0.01	0.989821	0.928311	0.951018	0	4.03124	5.03363	5.37502	5.36026	RNF115	ring finger protein 115	27246	NA	1
7904974	-1.42	0.372511	0.0047484	0.0105177	-1	-1.55	0.341509	0.00405577	0.00556326	-1	-0.13	0.916777	0.783388	0.826485	0	1.46	2.76063	0.00136691	0.00229837	1	0.04	1.02836	0.920633	0.964686	0	-0.09	0.942779	0.827404	0.872047	0	8.32594	9.75059	9.87595	9.79094	C1orf152	chromosome 1 open reading frame 152	767846	608609	1
7905163	-1.58	0.334975	8.37e-07	2.58e-05	-1	-2.19	0.219841	1.32e-08	1.77e-07	-1	-0.61	0.65629	0.015967	0.0352241	0	1.57	2.97468	2.77e-07	2.28e-06	1	-0.01	0.996442	0.980693	0.991079	0	-0.61	0.653955	0.00613338	0.0251761	0	6.15397	7.73184	8.33944	7.7267	MRPS21	mitochondrial ribosomal protein S21	54460	611984	1
7905339	-1.19	0.438923	3.97e-05	0.000295884	-1	-1.42	0.373608	7.55e-06	2.05e-05	-1	-0.23	0.851191	0.321515	0.399373	0	1.24	2.35618	3.57e-06	1.53e-05	1	0.05	1.03418	0.814292	0.909086	0	-0.18	0.880288	0.355418	0.467406	0	5.10192	6.28988	6.52233	6.33837	GABPB2	GA binding protein transcription factor, beta subunit 2	126626	NA	1
7905365	-1.08	0.472752	0.000664374	0.0022631	-1	-1.62	0.325907	1.11e-05	2.86e-05	-1	-0.54	0.689382	0.0584554	0.0978668	0	1.02	2.03274	0.000215694	0.00045263	1	-0.06	0.960983	0.811471	0.90796	0	-0.59	0.662485	0.0157926	0.0486802	0	4.48044	5.56129	6.09791	5.50387	PIP5K1A	phosphatidylinositol-4-phosphate 5-kinase, type I, alpha	8394	603275	1
7905395	-1.26	0.416842	6.87e-06	9.15e-05	-1	-1.8	0.287895	6.39e-08	5.13e-07	-1	-0.53	0.690658	0.0196962	0.0415235	0	1.22	2.32409	9.99e-07	5.82e-06	1	-0.05	0.968776	0.809692	0.906966	0	-0.58	0.669093	0.00376711	0.0180845	0	7.18229	8.44472	8.97867	8.39895	PSMB4	proteasome (prosome, macropain) subunit, beta type, 4	5692	602177	1
7905700	-1.28	0.412286	4.07e-05	0.000302151	-1	-1.57	0.33704	5.68e-06	1.62e-05	-1	-0.29	0.81749	0.252933	0.325963	0	1.32	2.49473	4.48e-06	1.84e-05	1	0.04	1.02854	0.855508	0.932824	0	-0.25	0.840822	0.248373	0.357279	0	5.83931	7.1176	7.40832	7.1582	UBAP2L	ubiquitin associated protein 2-like	9898	NA	1, 1
7905733	-1.8	0.286499	5.02e-06	7.64e-05	-1	-2.02	0.247072	1.73e-06	6.19e-06	-1	-0.21	0.862381	0.477066	0.553295	0	1.64	3.11779	2.16e-06	1.03e-05	1	-0.16	0.893244	0.543022	0.747552	0	-0.38	0.770317	0.145562	0.239845	0	4.26961	6.07301	6.28661	5.91014	HAX1	HCLS1 associated protein X-1	10456	605998, 610738	1
7906819	-1.1	0.467205	3.46e-05	0.000269498	-1	-1.9	0.267733	2.86e-08	2.97e-07	-1	-0.8	0.573052	0.000995105	0.00463879	0	1.15	2.22282	3.12e-06	1.38e-05	1	0.05	1.03851	0.773459	0.889031	0	-0.75	0.595123	0.000434454	0.00428033	0	5.28507	6.38294	7.1862	6.43746	ATF6	activating transcription factor 6	22926	605537	1
7906852	-1.57	0.335769	3.66e-07	1.65e-05	-1	-2.34	0.197209	1.39e-09	4.34e-08	-1	-0.77	0.587333	0.00206443	0.00774676	0	1.49	2.80167	9.09e-08	1.04e-06	1	-0.09	0.940714	0.653226	0.819302	0	-0.86	0.552513	0.00015073	0.00210694	0	4.71594	6.2904	7.05815	6.20223	UHMK1	U2AF homology motif (UHM) kinase 1	127933	608849	1
7906954	-1.09	0.469876	0.000129731	0.000679815	-1	-1.2	0.436647	8.73e-05	0.000168338	-1	-0.11	0.92928	0.654494	0.716359	0	1.21	2.31651	6.38e-06	2.42e-05	1	0.12	1.08847	0.561249	0.76208	0	0.02	1.0115	0.934676	0.955317	0	6.20439	7.29404	7.39986	7.41635	PBX1	pre-B-cell leukemia homeobox 1	5087	176310	1
7906978	-2.44	0.183695	2.31e-08	3.72e-06	-1	-2.88	0.135666	3.68e-09	7.7e-08	-1	-0.44	0.738541	0.141844	0.203104	0	2.03	4.09709	4.83e-08	6.82e-07	1	-0.41	0.752614	0.121161	0.341384	0	-0.85	0.555836	0.00218263	0.0125901	0	5.62819	8.07281	8.51006	7.66279	MGST3	microsomal glutathione S-transferase 3	4259	604564	1
7907104	-1.19	0.438514	5e-06	7.62e-05	-1	-1.84	0.279966	1.61e-08	2.04e-07	-1	-0.65	0.638442	0.00350704	0.0114486	0	1.54	2.89883	1.42e-08	2.88e-07	1	0.35	1.27118	0.0619136	0.245078	0	-0.3	0.811573	0.0902536	0.168614	0	5.62484	6.81415	7.46152	7.16031	IQWD1	IQ motif and WD repeats 1	55827	610494	1
7907160	-2.4	0.190003	0.000166176	0.000819338	-1	-3.55	0.0855541	2.19e-06	7.48e-06	-1	-1.15	0.450277	0.0386453	0.070335	0	2.9	7.48836	3.21e-06	1.41e-05	1	0.51	1.42281	0.28938	0.536215	0	-0.64	0.64066	0.165704	0.264194	0	4.36623	6.76214	7.91325	7.27088	ATP1B1	ATPase, Na+/K+ transporting, beta 1 polypeptide	481	145500, 182330	1
7907222	-1.26	0.418593	0.000108588	0.00059888	-1	-1.85	0.277005	1.23e-06	4.7e-06	-1	-0.6	0.661753	0.0339903	0.0635233	0	1.67	3.17614	3.89e-07	2.93e-06	1	0.41	1.32951	0.0950146	0.301832	0	-0.18	0.879808	0.41954	0.527369	0	5.51759	6.77397	7.36961	7.18487	PRRX1	paired related homeobox 1	5396	167420	1
7908041	-1.39	0.38074	2.98e-07	1.45e-05	-1	-1.88	0.272481	1.14e-09	3.84e-08	-1	-0.48	0.715663	0.0148273	0.0333785	0	1.75	3.35915	1.49e-10	1.56e-08	1	0.35	1.27896	0.0436207	0.206004	0	-0.13	0.915306	0.403463	0.512462	0	4.98217	6.37529	6.85794	6.73026	LAMC1	laminin, gamma 1 (formerly LAMB2)	3915	150290, 176780	1
7908097	-1.09	0.470906	1.04e-05	0.000121979	-1	-1.65	0.318682	4.22e-08	3.83e-07	-1	-0.56	0.676743	0.00698509	0.0190744	0	1.4	2.63104	3.75e-08	5.74e-07	1	0.31	1.23897	0.0817645	0.280794	0	-0.25	0.838465	0.131107	0.222019	0	5.08954	6.17603	6.73935	6.48517	SMG7	Smg-7 homolog, nonsense mediated mRNA decay factor (C. elegans)	9887	610964	1
7908330	-1.22	0.428551	4.88e-05	0.000341748	-1	-2.09	0.235333	8e-08	5.98e-07	-1	-0.86	0.549138	0.00189792	0.00729471	0	1.92	3.78401	7.45e-09	1.9e-07	1	0.7	1.62164	0.00359267	0.0600611	0	-0.17	0.890503	0.435508	0.542243	0	3.71974	4.94221	5.80697	5.63966	C1orf27	chromosome 1 open reading frame 27	54953	609335	1
7908347	-1.77	0.292506	1.53e-05	0.000156399	-1	-2.67	0.157166	4.15e-08	3.79e-07	-1	-0.9	0.537308	0.00877145	0.0224545	0	2.69	6.4675	9.15e-10	4.67e-08	1	0.92	1.89178	0.00320185	0.0567251	0	0.02	1.01647	0.928575	0.951199	0	3.66954	5.443	6.33918	6.36275	OCLM	oculomedin	10896	604301	1
7908437	-1.09	0.470298	8.36e-06	0.00010539	-1	-1.64	0.321235	8.46e-08	6.19e-07	-1	-0.55	0.683046	0.00904068	0.0229281	0	1.37	2.58226	9.21e-08	1.05e-06	1	0.28	1.21443	0.113996	0.33115	0	-0.27	0.829512	0.122287	0.210806	0	6.41791	7.50626	8.05621	7.78654	CDC73	cell division cycle 73, Paf1/RNA polymerase II complex component, homolog (S. cerevisiae)	79577	145000, 145001, 607393, 608266	1
7908766	-2.21	0.216197	4.33e-05	0.00031541	-1	-2.75	0.148361	4.58e-06	1.36e-05	-1	-0.54	0.686232	0.218502	0.28853	0	1.82	3.5365	8.09e-05	0.000195118	1	-0.39	0.764582	0.321826	0.568414	0	-0.93	0.52468	0.0180977	0.0533798	0	4.09654	6.30612	6.84935	5.91886	TIMM17A	translocase of inner mitochondrial membrane 17 homolog A (yeast)	10440	605057	1
7908940	-1.61	0.326741	2.45e-07	1.34e-05	-1	-2.46	0.182377	9.31e-11	8.02e-09	-1	-0.84	0.558171	0.000561993	0.00312947	0	1.98	3.93348	1.43e-10	1.52e-08	1	0.36	1.28523	0.0685296	0.258346	0	-0.48	0.717378	0.0103102	0.0357792	0	5.48026	7.09404	7.93526	7.45607	ATP2B4	ATPase, Ca++ transporting, plasma membrane 4	493	108732	1
7908978	-2.24	0.212275	1.4e-06	3.48e-05	-1	-3.04	0.121912	2.48e-08	2.67e-07	-1	-0.8	0.574311	0.0271434	0.0534892	0	2.84	7.14564	2.95e-09	1.01e-07	1	0.6	1.51684	0.05832	0.238439	0	-0.2	0.871138	0.49673	0.597618	0	4.52884	6.76483	7.56493	7.3659	ZC3H11A	zinc finger CCCH-type containing 11A	9877	NA	1
7909603	-1.7	0.30777	2.29e-07	1.29e-05	-1	-2.01	0.248112	3.56e-08	3.41e-07	-1	-0.31	0.80616	0.187754	0.255075	0	1.47	2.77146	2.65e-07	2.22e-06	1	-0.23	0.852973	0.271665	0.519599	0	-0.54	0.687633	0.011044	0.0375145	0	5.89587	7.59594	7.90681	7.36652	NENF	neuron derived neurotrophic factor	29937	611874	1
7909898	-1.06	0.480302	1.41e-06	3.49e-05	-1	-1.58	0.334256	8.75e-09	1.33e-07	-1	-0.52	0.695928	0.00409201	0.0128534	0	1.42	2.67792	2.86e-09	9.85e-08	1	0.36	1.28621	0.0204962	0.140115	0	-0.16	0.895109	0.272076	0.381976	0	4.60746	5.66545	6.18843	6.02857	MIA3	melanoma inhibitory activity family, member 3	375056	NA	1
7909967	-1.38	0.385432	1.92e-06	4.17e-05	-1	-1.33	0.397332	2.13e-06	7.3e-06	-1	0.04	1.03087	0.831724	0.867599	0	1.42	2.67322	2.93e-08	4.83e-07	1	0.04	1.03034	0.816712	0.910482	0	0.09	1.06215	0.6065	0.69634	0	5.8102	7.18565	7.14178	7.22877	CAPN2	calpain 2, (m/II) large subunit	824	114230	1
7910099	-1.25	0.421572	1.36e-05	0.00014413	-1	-1.85	0.276972	7.3e-08	5.7e-07	-1	-0.61	0.656997	0.0117331	0.0278876	0	1.48	2.79898	1.33e-07	1.36e-06	1	0.24	1.17997	0.238449	0.485031	0	-0.37	0.775238	0.0629375	0.129708	0	5.09299	6.33913	6.94518	6.57789	SRP9	signal recognition particle 9kDa	6726	600707	1
7910124	-1.72	0.30333	7.48e-07	2.37e-05	-1	-2.5	0.176731	3.84e-09	7.95e-08	-1	-0.78	0.582635	0.00499109	0.0148375	0	1.81	3.51273	7.15e-08	8.99e-07	1	0.09	1.06552	0.688738	0.840081	0	-0.69	0.620807	0.00417115	0.0194268	0	8.19685	9.91789	10.6972	10.0094	H3F3A	H3 histone, family 3A	3020	601128	1
7910752	-1.17	0.445795	7.44e-05	0.000454696	-1	-1.56	0.339793	3.3e-06	1.04e-05	-1	-0.39	0.762219	0.112333	0.167748	0	1.76	3.39776	2.19e-08	3.94e-07	1	0.6	1.5147	0.00944315	0.0968321	0	0.21	1.15453	0.314354	0.42626	0	5.07278	6.23833	6.63005	6.83736	MTR	5-methyltetrahydrofolate-homocysteine methyltransferase	4548	119530, 156570, 190685, 250940, 601634	1
7911333	-1.04	0.486877	2.2e-06	4.5e-05	-1	-1.59	0.331497	3.35e-09	7.21e-08	-1	-0.55	0.680863	0.00216725	0.00799913	0	1.21	2.31428	2.83e-08	4.74e-07	1	0.17	1.12677	0.247223	0.493204	0	-0.38	0.767177	0.0101923	0.0355154	0	6.02496	7.06333	7.61789	7.23553	RPL23AP82	ribosomal protein L23a pseudogene 82	284942	NA	22, 22, 22, 22
7911335	-1.38	0.383726	0.00369387	0.00861299	-1	-1.71	0.306244	0.00101778	0.00154325	-1	-0.33	0.798078	0.448279	0.524865	0	1.29	2.4486	0.00225025	0.00359928	1	-0.09	0.939594	0.812821	0.908481	0	-0.42	0.749869	0.2608	0.37062	0	10.0931	11.475	11.8004	11.3851	---	---	NA	NA
7911339	-1.49	0.355415	0.00148875	0.00421856	-1	-1.94	0.260732	0.000197316	0.000347433	-1	-0.45	0.733599	0.284024	0.359341	0	1.2	2.29496	0.00326434	0.0050407	1	-0.29	0.815664	0.427097	0.659778	0	-0.74	0.59837	0.0445144	0.100764	0	8.14885	9.64127	10.0882	9.34732	---	---	NA	NA
7911619	-1.36	0.389145	1.77e-08	3.28e-06	-1	-1.35	0.393409	3.35e-08	3.28e-07	-1	0.02	1.01096	0.919885	0.940272	0	1.36	2.56444	1.08e-09	5.27e-08	1	0	0.997938	0.983055	0.992053	0	0.01	1.00887	0.922842	0.947251	0	5.92859	7.2902	7.27448	7.28723	GNB1	guanine nucleotide binding protein (G protein), beta polypeptide 1	2782	139380	1
7912198	-2.28	0.206381	0.000241595	0.00107418	-1	-2.77	0.146894	4.12e-05	8.76e-05	-1	-0.49	0.711763	0.347378	0.425264	0	1.67	3.18315	0.00115559	0.00197774	1	-0.61	0.656941	0.196896	0.437127	0	-1.1	0.467586	0.0187615	0.0546594	0	5.36213	7.63875	8.12928	7.03258	ENO1	enolase 1, (alpha)	2023	172430	1
7912292	-1.18	0.440301	0.000205659	0.000953781	-1	-1.59	0.332481	1.21e-05	3.07e-05	-1	-0.41	0.755121	0.139562	0.200405	0	1.07	2.10544	0.000129645	0.000292497	1	-0.11	0.927025	0.645367	0.815268	0	-0.51	0.700017	0.0323491	0.0801614	0	3.69405	4.87749	5.28271	4.76817	LZIC	leucine zipper and CTNNBIP1 domain containing	84328	610458	1
7912670	-1.32	0.400474	0.00627382	0.0132181	-1	-1.89	0.270029	0.00048323	0.000779544	-1	-0.57	0.674274	0.201641	0.270048	0	1.13	2.19281	0.00748318	0.0107985	1	-0.19	0.878163	0.631504	0.806045	0	-0.76	0.592123	0.0524205	0.113422	0	7.84344	9.16366	9.73225	8.97622	UQCRH	ubiquinol-cytochrome c reductase hinge protein	7388	NA	1
7912928	-1.6	0.329698	1.52e-07	1.02e-05	-1	-2.2	0.217959	6.14e-10	2.69e-08	-1	-0.6	0.661088	0.00776369	0.0205087	0	1.28	2.42651	1.65e-07	1.57e-06	1	-0.32	0.800015	0.0909781	0.295713	0	-0.92	0.528881	1.69e-05	0.000465881	0	3.99555	5.59633	6.19342	5.27443	SDHB	succinate dehydrogenase complex, subunit B, iron sulfur (Ip)	6390	115310, 171300, 185470, 606864, 612359	1
7913001	-1.02	0.492698	2.2e-05	0.00020111	-1	-1.42	0.37265	2.78e-07	1.5e-06	-1	-0.4	0.756347	0.0411249	0.0736945	0	1.33	2.51528	3.05e-08	4.96e-07	1	0.31	1.23927	0.0749488	0.270385	0	-0.09	0.93732	0.555345	0.65267	0	5.06448	6.0857	6.48858	6.3952	UBR4	ubiquitin protein ligase E3 component n-recognin 4	23352	609890	1
7913169	-1.21	0.431889	5.27e-05	0.00036036	-1	-1.55	0.341202	2.79e-06	9.05e-06	-1	-0.34	0.790022	0.16355	0.227481	0	1.02	2.02961	5.79e-05	0.000146094	1	-0.19	0.876568	0.378158	0.619694	0	-0.53	0.692508	0.0139095	0.044212	0	5.92368	7.13495	7.47498	6.94489	CAPZB	capping protein (actin filament) muscle Z-line, beta	832	601572	1
7913300	-1.25	0.420367	3.56e-05	0.000275169	-1	-1.76	0.295847	7.18e-07	3.14e-06	-1	-0.51	0.703784	0.0464528	0.0811921	0	1.62	3.06384	1.35e-07	1.37e-06	1	0.37	1.28794	0.101437	0.312397	0	-0.14	0.90643	0.496748	0.597618	0	5.78949	7.03977	7.54657	7.40483	HP1BP3	heterochromatin protein 1, binding protein 3	50809	NA	1
7913415	-1.5	0.354023	1.2e-08	2.58e-06	-1	-2.3	0.20285	5.52e-11	6.16e-09	-1	-0.8	0.572986	0.000163519	0.00132923	0	2.26	4.78401	6.14e-13	8.74e-10	1	0.76	1.69365	5.03e-05	0.00832114	0	-0.04	0.970438	0.781446	0.836219	0	3.95782	5.45591	6.25933	6.21604	USP48	ubiquitin specific peptidase 48	84196	NA	1, 1
7913571	-1.41	0.375946	0.000432305	0.00164767	-1	-2.08	0.23624	1.33e-05	3.33e-05	-1	-0.67	0.628388	0.0644997	0.106066	0	2.02	4.04648	1.86e-06	9.24e-06	1	0.61	1.52126	0.0608473	0.243011	0	-0.07	0.95594	0.830075	0.873633	0	6.19092	7.60232	8.2726	8.20759	HNRNPR	heterogeneous nuclear ribonucleoprotein R	10236	607201	1
7914139	-1.52	0.348243	0.000481774	0.00178863	-1	-2.18	0.220093	1.47e-05	3.64e-05	-1	-0.66	0.632008	0.0864227	0.134513	0	1.63	3.10026	4.89e-05	0.000127049	1	0.11	1.07964	0.738636	0.869949	0	-0.55	0.682344	0.0934538	0.17329	0	3.92894	5.45077	6.11276	5.56133	PPP1R8	protein phosphatase 1, regulatory (inhibitor) subunit 8	NA	NA
7914296	-1.21	0.431625	7.2e-05	0.000444924	-1	-1.93	0.262147	1.66e-07	1.03e-06	-1	-0.72	0.607348	0.00727411	0.0195701	0	1.45	2.73913	6.91e-07	4.45e-06	1	0.24	1.18228	0.278216	0.5257	0	-0.48	0.718054	0.029449	0.0754139	0	5.62153	6.83368	7.55309	7.07525	PUM1	pumilio homolog 1 (Drosophila)	9698	607204	1
7914887	-1.45	0.366368	5.69e-05	0.000379998	-1	-2	0.249846	1.07e-06	4.22e-06	-1	-0.55	0.681955	0.0651682	0.107073	0	1.24	2.3678	4.99e-05	0.000129086	1	-0.21	0.867486	0.428578	0.660759	0	-0.76	0.591586	0.00449978	0.0205203	0	4.88173	6.33037	6.88262	6.12528	TRAPPC3	trafficking protein particle complex 3	27095	610955	1
7915130	-1.33	0.39828	1.23e-05	0.000133539	-1	-2.05	0.240747	2.2e-08	2.52e-07	-1	-0.73	0.604466	0.00459893	0.0139758	0	1.65	3.12965	4.07e-08	6.07e-07	1	0.32	1.24648	0.138308	0.366064	0	-0.41	0.753454	0.0465539	0.103981	0	4.77093	6.09908	6.82535	6.41694	SF3A3	splicing factor 3a, subunit 3, 60kDa	10946	605596	1
7915160	-1.57	0.337915	4.46e-06	7.15e-05	-1	-2.28	0.20588	3.13e-08	3.16e-07	-1	-0.71	0.609268	0.0108424	0.0263024	0	1.41	2.65186	3.83e-06	1.62e-05	1	-0.16	0.896102	0.498154	0.714609	0	-0.87	0.545966	0.000646888	0.00560312	0	3.95852	5.52379	6.23864	5.36553	RRAGC	Ras-related GTP binding C	64121	608267	1
7915733	-1.51	0.351251	2.6e-05	0.000221508	-1	-2	0.249875	8.13e-07	3.43e-06	-1	-0.49	0.711386	0.0920113	0.141624	0	1.18	2.26391	8.67e-05	0.000206995	1	-0.33	0.7952	0.199427	0.439646	0	-0.82	0.565695	0.00208807	0.0121926	0	6.13161	7.64103	8.13233	7.31042	PRDX1	peroxiredoxin 1	5052	176763	1
7915787	-1.25	0.419616	0.00244038	0.00617639	-1	-1	0.498568	0.0167224	0.0210058	-1	0.25	1.18815	0.499643	0.573698	0	1.02	2.02811	0.00442194	0.00665329	1	-0.23	0.851025	0.478447	0.699934	0	0.02	1.01115	0.959223	0.971308	0	4.8124	6.06526	5.81653	5.83253	PIK3R3	phosphoinositide-3-kinase, regulatory subunit 3 (gamma)	8503	606076	1, 1
7915870	-1.05	0.484489	5.98e-06	8.45e-05	-1	-1.14	0.454647	2.29e-06	7.75e-06	-1	-0.09	0.938405	0.59793	0.664427	0	1.18	2.26979	7.65e-08	9.37e-07	1	0.14	1.09969	0.383883	0.624717	0	0.05	1.03196	0.755397	0.816094	0	4.99729	6.04275	6.13447	6.17985	ATPAF1	ATP synthase mitochondrial F1 complex assembly factor 1	64756	608917	1
7915955	-1.01	0.496447	0.0020036	0.00529274	-1	-1.45	0.366418	9.42e-05	0.000179794	-1	-0.44	0.73808	0.13829	0.198822	0	1.53	2.87798	4.2e-06	1.74e-05	1	0.51	1.42876	0.054592	0.229865	0	0.08	1.05454	0.755199	0.816024	0	4.77575	5.78604	6.22419	6.3008	SPATA6	spermatogenesis associated 6	54558	NA	1
7916045	-1.4	0.379537	1.48e-05	0.000152643	-1	-2.19	0.21893	4.44e-08	3.95e-07	-1	-0.79	0.576833	0.00455394	0.0139048	0	1.88	3.67437	2.05e-08	3.79e-07	1	0.48	1.39456	0.0422414	0.202695	0	-0.31	0.804428	0.157485	0.254956	0	5.25921	6.6569	7.45067	7.13671	EPS15	epidermal growth factor receptor pathway substrate 15	2060	600051	1
7916262	-2	0.250612	9.69e-12	1.06e-07	-1	-2.43	0.185828	1.77e-12	9.75e-10	-1	-0.43	0.741499	0.0124274	0.0291447	0	2.23	4.70336	1.38e-13	2.52e-10	1	0.24	1.17872	0.100495	0.311106	0	-0.19	0.874017	0.171695	0.270979	0	5.54312	7.5396	7.97108	7.77681	C1orf123	chromosome 1 open reading frame 123	54987	NA	1
7916274	-1.08	0.473941	6.36e-06	8.74e-05	-1	-1.38	0.385489	2.39e-07	1.34e-06	-1	-0.3	0.81337	0.108352	0.162566	0	1	2.00578	2.57e-06	1.19e-05	1	-0.07	0.950619	0.654864	0.819404	0	-0.37	0.773205	0.0222168	0.0617002	0	5.03223	6.10945	6.40747	6.03639	MAGOH	mago-nashi homolog, proliferation-associated (Drosophila)	4116	602603	1
7916592	-1.33	0.397156	0.000199132	0.000932211	-1	-2.13	0.228264	1.03e-06	4.12e-06	-1	-0.8	0.574747	0.0135145	0.0310704	0	1.97	3.90497	1.75e-07	1.65e-06	1	0.63	1.55088	0.0252753	0.155565	0	-0.17	0.891365	0.521238	0.619377	0	5.14167	6.47389	7.27289	7.10698	MYSM1	Myb-like, SWIRM and MPN domains 1	114803	612176	1
7916747	-1.76	0.295625	3.72e-08	4.79e-06	-1	-2.74	0.150058	3.03e-11	4.53e-09	-1	-0.98	0.507597	0.000128695	0.00114278	0	1.88	3.68311	1.01e-09	5e-08	1	0.12	1.08882	0.52125	0.73164	0	-0.86	0.55268	9.42e-05	0.00153739	0	4.90723	6.66539	7.64363	6.78815	JAK1	Janus kinase 1 (a protein tyrosine kinase)	3716	147795	1
7916862	-1.54	0.34446	7.28e-09	1.89e-06	-1	-2.36	0.195115	3.07e-12	1.4e-09	-1	-0.82	0.566437	5.53e-05	0.000668189	0	1.72	3.29548	2.48e-11	5.3e-09	1	0.18	1.13516	0.227044	0.471917	0	-0.64	0.642998	0.000124473	0.00184615	0	5.24427	6.78186	7.60187	6.96476	GPR177	G protein-coupled receptor 177	79971	611514	1, 1
7917182	-1.21	0.432532	0.00478118	0.0105774	-1	-1.36	0.389295	0.00306678	0.00428683	-1	-0.15	0.900038	0.694656	0.750695	0	1.83	3.56103	2.03e-05	6.12e-05	1	0.62	1.54026	0.0804197	0.278861	0	0.47	1.38629	0.163053	0.261186	0	3.42067	4.6298	4.78174	5.25297	ELTD1	EGF, latrophilin and seven transmembrane domain containing 1	64123	NA	1
7917347	-1.06	0.478836	3.62e-05	0.000277243	-1	-1.31	0.403567	5.23e-06	1.52e-05	-1	-0.25	0.842807	0.240923	0.312772	0	1.08	2.10848	6.24e-06	2.38e-05	1	0.01	1.00962	0.940329	0.974422	0	-0.23	0.850912	0.197525	0.301052	0	4.91675	5.97915	6.22587	5.99296	DDAH1	dimethylarginine dimethylaminohydrolase 1	23576	604743	1, 1
7917530	-1.34	0.394466	0.000242581	0.00107616	-1	-1.8	0.286654	1.36e-05	3.4e-05	-1	-0.46	0.726688	0.143248	0.204714	0	1.54	2.9096	7.94e-06	2.88e-05	1	0.2	1.14774	0.468427	0.693536	0	-0.26	0.834046	0.32137	0.433324	0	4.41323	5.75526	6.21585	5.95405	---	---	NA	NA
7917649	-1.2	0.43663	0.000185865	0.000884497	-1	-1.51	0.35163	1.43e-05	3.56e-05	-1	-0.31	0.805328	0.240415	0.312334	0	1.37	2.58317	3.88e-06	1.64e-05	1	0.17	1.12789	0.462107	0.68875	0	-0.14	0.908322	0.529215	0.627152	0	4.42759	5.62311	5.93546	5.79674	TGFBR3	transforming growth factor, beta receptor III	7049	600742	1
7918437	-1.3	0.40613	6.75e-05	0.000425097	-1	-1.98	0.252861	2.75e-07	1.49e-06	-1	-0.68	0.622612	0.0148281	0.0333785	0	1.12	2.17872	6.07e-05	0.000151875	1	-0.18	0.884842	0.455038	0.683339	0	-0.86	0.550914	0.000685594	0.00582755	0	4.61357	5.91356	6.59715	5.73705	HBXIP	hepatitis B virus x interacting protein	10542	608521	1
7918474	-1.19	0.4379	9.05e-05	0.000526533	-1	-1.84	0.278938	6.65e-07	2.96e-06	-1	-0.65	0.636989	0.015907	0.0351368	0	1.5	2.82067	6.35e-07	4.17e-06	1	0.3	1.23517	0.17852	0.416967	0	-0.35	0.78679	0.118304	0.205626	0	3.97747	5.1688	5.81946	5.47351	TMEM77	transmembrane protein 77	128338	NA	1
7919715	-1.08	0.471723	0.00385926	0.00892061	-1	-2.04	0.24385	1.04e-05	2.69e-05	-1	-0.95	0.516934	0.00929077	0.0233895	0	1.46	2.75441	6.21e-05	0.000155102	1	0.38	1.29932	0.215902	0.459582	0	-0.57	0.671662	0.0570803	0.120896	0	6.64088	7.72487	8.67682	8.10262	ANP32E	acidic (leucine-rich) nuclear phosphoprotein 32 family, member E	81611	609611	1, 1
7919780	-1.9	0.267985	2.31e-08	3.72e-06	-1	-2.66	0.158726	1.54e-10	1.14e-08	-1	-0.76	0.592295	0.00260956	0.00913387	0	2.03	4.08055	4.69e-10	3.07e-08	1	0.13	1.09353	0.519115	0.73002	0	-0.63	0.647691	0.00314381	0.0160809	0	3.60379	5.50357	6.25918	5.63256	GOLPH3L	golgi phosphoprotein 3-like	55204	612208	1
7919888	-1.17	0.444114	1.72e-05	0.000168745	-1	-1.59	0.332648	3.61e-07	1.83e-06	-1	-0.42	0.749016	0.0594489	0.0991813	0	1.37	2.5907	2.38e-07	2.05e-06	1	0.2	1.15056	0.295023	0.541545	0	-0.21	0.861791	0.241191	0.349431	0	4.89767	6.06867	6.4856	6.27101	CDC42SE1	CDC42 small effector 1	56882	NA	1
7920123	-1.23	0.42695	1.98e-06	4.25e-05	-1	-2.04	0.243865	8.9e-10	3.28e-08	-1	-0.81	0.571178	0.000303221	0.00200758	0	1.18	2.2682	4.21e-07	3.11e-06	1	-0.05	0.968408	0.786539	0.896041	0	-0.85	0.553134	2.34e-05	0.000580314	0	7.63484	8.8627	9.67069	8.81639	S100A10	S100 calcium binding protein A10	6281	114085	1
7920492	-1.37	0.385599	6.26e-06	8.68e-05	-1	-1.98	0.252776	6.15e-08	4.99e-07	-1	-0.61	0.655543	0.0154301	0.0343446	0	1.27	2.41059	3.44e-06	1.49e-05	1	-0.11	0.929519	0.614498	0.794262	0	-0.71	0.609339	0.00159517	0.0103054	0	5.31726	6.69208	7.30132	6.58664	C1orf43	chromosome 1 open reading frame 43	25912	NA	1
7920766	-1.12	0.458656	4.46e-08	5.41e-06	-1	-2.03	0.24515	4.35e-12	1.63e-09	-1	-0.9	0.534496	1.6e-06	6.95e-05	0	1.39	2.61638	1.24e-10	1.47e-08	1	0.26	1.20002	0.0431586	0.20511	0	-0.64	0.641406	2.35e-05	0.000580314	0	5.10055	6.22507	7.12881	6.48812	ASH1L	ash1 (absent, small, or homeotic)-like (Drosophila)	55870	607999	1
7920903	-1.25	0.421756	4.77e-05	0.000336862	-1	-2.14	0.22765	3.41e-08	3.31e-07	-1	-0.89	0.539768	0.00137216	0.00585527	0	1.36	2.56237	1.83e-06	9.14e-06	1	0.11	1.08069	0.609416	0.790953	0	-0.78	0.583323	0.00102237	0.00761646	0	5.6441	6.88963	7.77922	7.00158	SSR2	signal sequence receptor, beta (translocon-associated protein beta)	6746	600867	1
7921970	-1.38	0.384697	6.72e-05	0.000424107	-1	-2.26	0.208209	9.64e-08	6.8e-07	-1	-0.89	0.541227	0.0039717	0.0125657	0	1.14	2.20615	0.000101105	0.00023625	1	-0.24	0.848702	0.346616	0.591797	0	-1.12	0.45934	8.01e-05	0.00138119	-1	4.69736	6.07556	6.96126	5.83889	ALDH9A1	aldehyde dehydrogenase 9 family, member A1	223	602733	1
7921987	-1.45	0.366785	3.44e-05	0.000268457	-1	-2.12	0.229348	2.36e-07	1.33e-06	-1	-0.68	0.625292	0.021383	0.0442936	0	1.91	3.76911	5.48e-08	7.46e-07	1	0.47	1.38245	0.0687018	0.258869	0	-0.21	0.864437	0.372199	0.482909	0	4.41641	5.86341	6.54081	6.33064	TMCO1	transmembrane and coiled-coil domains 1	54499	NA	1
7922104	-1.57	0.336339	1.21e-05	0.000132962	-1	-1.69	0.309604	8.5e-06	2.27e-05	-1	-0.12	0.920512	0.669115	0.728496	0	1.38	2.60574	1.09e-05	3.68e-05	1	-0.19	0.876412	0.448128	0.677253	0	-0.31	0.806748	0.200118	0.30386	0	4.59783	6.16984	6.28933	5.97952	GCSH	glycine cleavage system protein H (aminomethyl carrier)	2653	238330, 605899	16
7922130	-1.84	0.279757	1.82e-06	4.01e-05	-1	-1.86	0.274706	6.34e-07	2.85e-06	-1	-0.03	0.981948	0.922704	0.942517	0	1.82	3.53844	4.03e-08	6.04e-07	1	-0.01	0.989903	0.952654	0.979906	0	-0.04	0.972033	0.851246	0.890343	0	4.8656	6.70335	6.72963	6.68871	DPT	dermatopontin	1805	125597	1
7922889	-1.69	0.309102	4.64e-07	1.81e-05	-1	-2.65	0.159361	8.78e-10	3.26e-08	-1	-0.96	0.515563	0.000668986	0.0035191	0	2.39	5.25619	1.38e-10	1.52e-08	1	0.7	1.6247	0.00336768	0.058247	0	-0.26	0.837634	0.231216	0.338651	0	4.86897	6.56282	7.5186	7.26299	IVNS1ABP	influenza virus NS1A binding protein	10625	609209	1
7923440	-1.07	0.476179	0.0116326	0.0218256	-1	-1.61	0.32769	0.000632865	0.000998823	-1	-0.54	0.688165	0.171113	0.236018	0	1.63	3.10159	8.31e-05	0.000199657	1	0.56	1.47691	0.114189	0.331527	0	0.02	1.01636	0.94301	0.960939	0	2.44245	3.51288	4.05205	4.07546	---	---	NA	NA
7923798	-1.28	0.412201	8.67e-08	7.76e-06	-1	-1.14	0.454784	1.42e-06	5.27e-06	-1	0.14	1.10331	0.392315	0.471045	0	1.54	2.90033	8.04e-10	4.37e-08	1	0.26	1.19552	0.0934709	0.299472	0	0.4	1.31902	0.00947015	0.0340745	0	7.89963	9.17821	9.03637	9.43585	NUCKS1	nuclear casein kinase and cyclin-dependent kinase substrate 1	64710	611912	1
7923978	-1.34	0.395521	0.000518105	0.00188241	-1	-1.94	0.260855	7.4e-06	2.02e-05	-1	-0.6	0.659522	0.0723718	0.11644	0	1.87	3.65057	7.64e-07	4.78e-06	1	0.53	1.44388	0.0768445	0.27268	0	-0.07	0.952268	0.79289	0.845569	0	5.56895	6.90713	7.50763	7.43707	CD34	CD34 molecule	947	142230	1
7924058	-1.29	0.41006	9.92e-06	0.000117578	-1	-1.88	0.272145	6.72e-08	5.35e-07	-1	-0.59	0.663672	0.0143052	0.0324294	0	1.05	2.07679	2.13e-05	6.38e-05	1	-0.23	0.851609	0.255263	0.503017	0	-0.82	0.565189	0.000250219	0.00300565	0	4.59181	5.87791	6.46936	5.64617	IRF6	interferon regulatory factor 6	3664	119300, 119500, 607199, 608864	1
7925174	-1.27	0.414132	6.11e-05	0.000396521	-1	-1.57	0.33696	6.08e-06	1.71e-05	-1	-0.3	0.813653	0.249452	0.322465	0	1.18	2.27211	2.18e-05	6.49e-05	1	-0.09	0.940952	0.700398	0.847002	0	-0.39	0.765608	0.0830876	0.159091	0	5.19826	6.4701	6.76761	6.38229	TOMM20	translocase of outer mitochondrial membrane 20 homolog (yeast)	9804	601848	1
7925201	-1.05	0.481353	1.93e-05	0.000183033	-1	-1.72	0.303536	3.11e-08	3.15e-07	-1	-0.67	0.630589	0.00232861	0.00840067	0	1.71	3.28062	1.22e-09	5.71e-08	1	0.66	1.57914	0.000902294	0.032537	0	-0.01	0.995788	0.970969	0.979391	0	4.77848	5.83331	6.49854	6.49245	ARID4B	AT rich interactive domain 4B (RBP1-like)	51742	609696	1
7925320	-1.36	0.389117	2.5e-05	0.000216798	-1	-1.39	0.382748	4.92e-05	0.000102052	-1	-0.02	0.983631	0.926783	0.945112	0	1.27	2.41381	1.37e-05	4.42e-05	1	-0.09	0.939257	0.69485	0.842904	0	-0.11	0.923882	0.608808	0.698456	0	3.83862	5.20034	5.22415	5.10993	NID1	nidogen 1	4811	131390	1
7925531	-1.53	0.346976	2.3e-06	4.6e-05	-1	-1.77	0.292808	4.15e-07	2.04e-06	-1	-0.24	0.843886	0.311475	0.389024	0	1.95	3.87657	3.77e-09	1.22e-07	1	0.43	1.34508	0.0557877	0.232488	0	0.18	1.13509	0.370654	0.48159	0	4.84954	6.37663	6.62151	6.80432	AKT3	v-akt murine thymoma viral oncogene homolog 3 (protein kinase B, gamma)	10000	611223	1, 1
7925565	-1.06	0.480416	7.35e-07	2.35e-05	-1	-1.36	0.389094	5.45e-08	4.61e-07	-1	-0.3	0.80991	0.0647621	0.106437	0	1.27	2.41357	6.65e-09	1.77e-07	1	0.21	1.15952	0.136419	0.363794	0	-0.09	0.939105	0.509759	0.609245	0	7.55567	8.61331	8.91748	8.82683	HNRNPU	heterogeneous nuclear ribonucleoprotein U (scaffold attachment factor A)	3192	602869	1
7925792	-1.04	0.487463	1.54e-06	3.66e-05	-1	-1.43	0.372353	8.33e-08	6.15e-07	-1	-0.39	0.76386	0.0280774	0.0548845	0	1.35	2.54666	1.63e-08	3.18e-07	1	0.31	1.2414	0.0456606	0.210331	0	-0.08	0.948258	0.606817	0.696609	0	5.80642	6.84306	7.23168	7.15503	ZMYND11	zinc finger, MYND domain containing 11	10771	608668	10, 10
7925821	-1.74	0.299248	0.00416902	0.00947039	-1	-2.69	0.154781	0.000131525	0.000242119	-1	-0.95	0.517233	0.0931904	0.143171	0	2.18	4.53611	0.000142234	0.000315624	1	0.44	1.35742	0.367261	0.609001	0	-0.51	0.702104	0.28214	0.392276	0	3.92714	5.66773	6.61884	6.1086	---	---	NA	NA
7925929	-1.19	0.43775	0.00398304	0.00914486	-1	-1.6	0.330696	0.000301647	0.000509079	-1	-0.4	0.755445	0.269121	0.343223	0	1.01	2.00845	0.0035083	0.00538538	1	-0.19	0.879201	0.56849	0.765503	0	-0.59	0.664188	0.0594165	0.124446	0	4.32262	5.51444	5.91904	5.32871	AKR1C3	aldo-keto reductase family 1, member C3 (3-alpha hydroxysteroid dehydrogenase, type II)	8644	603966	10
7925954	-1.12	0.459408	0.000311174	0.00129283	-1	-1.89	0.269942	8.42e-07	3.53e-06	-1	-0.77	0.587586	0.00752263	0.0200414	0	1.54	2.91724	9.79e-07	5.74e-06	1	0.42	1.3402	0.0817581	0.280794	0	-0.34	0.787485	0.136008	0.227707	0	5.56897	6.69112	7.45825	7.11357	NET1	neuroepithelial cell transforming 1	10276	606450	10, 10
7926239	-1.01	0.496166	1.61e-05	0.000161774	-1	-1.34	0.394538	6.35e-07	2.85e-06	-1	-0.33	0.795173	0.0832586	0.130489	0	1.28	2.425	7.97e-08	9.55e-07	1	0.27	1.2032	0.115334	0.333032	0	-0.06	0.956755	0.686271	0.762825	0	5.85875	6.86985	7.20051	7.13673	OPTN	optineurin	10133	137760, 602432, 606657	10
7926283	-1.47	0.361352	1.06e-06	2.96e-05	-1	-1.89	0.269416	5.92e-08	4.86e-07	-1	-0.42	0.745579	0.0673593	0.109765	0	1.67	3.18529	3.77e-08	5.76e-07	1	0.2	1.15101	0.317159	0.562803	0	-0.22	0.858169	0.26028	0.370024	0	4.81497	6.28349	6.70706	6.48639	PRPF18	PRP18 pre-mRNA processing factor 18 homolog (S. cerevisiae)	8559	604993	10
7926368	-1.18	0.442266	6.47e-05	0.000412023	-1	-1.08	0.471552	0.000352634	0.000586436	-1	0.09	1.06622	0.702381	0.757173	0	1.22	2.33647	9.59e-06	3.33e-05	1	0.05	1.03334	0.826004	0.916396	0	0.14	1.10177	0.50319	0.603442	0	7.52955	8.70656	8.61405	8.75388	VIM	vimentin	7431	193060	10
7926385	-1.04	0.486854	6.1e-05	0.000396103	-1	-1.69	0.308909	1.72e-07	1.05e-06	-1	-0.66	0.6345	0.00494288	0.0147423	0	1.28	2.42144	5.34e-07	3.7e-06	1	0.24	1.17889	0.21237	0.455268	0	-0.42	0.748005	0.0292288	0.0750995	0	5.04842	6.08685	6.74316	6.32428	STAM	signal transducing adaptor molecule (SH3 domain and ITAM motif) 1	8027	601899	10
7926565	-1.29	0.408914	0.00112761	0.00342293	-1	-2.15	0.226029	6.49e-06	1.8e-05	-1	-0.86	0.552754	0.0200966	0.0421543	0	1.91	3.75443	2.37e-06	1.11e-05	1	0.62	1.53524	0.0539776	0.228163	0	-0.24	0.848609	0.425104	0.532342	0	4.83567	6.1258	6.9811	6.74427	MLLT10	myeloid/lymphoid or mixed-lineage leukemia (trithorax homolog, Drosophila); translocated to, 10	8028	601626, 602409	10, 10
7926677	-1.2	0.434918	3.99e-05	0.000296966	-1	-1.86	0.276406	1.27e-07	8.44e-07	-1	-0.65	0.635534	0.00937556	0.023538	0	1.47	2.76683	2.13e-07	1.9e-06	1	0.27	1.20335	0.205253	0.447099	0	-0.39	0.764768	0.0580133	0.122398	0	4.18986	5.39104	6.045	5.65809	OTUD1	OTU domain containing 1	220213	612022	10
7926896	-1.92	0.263474	2.44e-07	1.34e-05	-1	-2.89	0.135301	3.01e-10	1.8e-08	-1	-0.96	0.513525	0.00105199	0.00482556	0	1.97	3.92375	1.04e-08	2.3e-07	1	0.05	1.03381	0.836101	0.921644	0	-0.91	0.530886	0.000313726	0.00352333	0	4.39377	6.31804	7.27953	6.366	CKS1B	CDC28 protein kinase regulatory subunit 1B	1163	116900	1
7927231	-1.01	0.494941	5.38e-07	2e-05	-1	-1.05	0.481436	1.01e-06	4.06e-06	-1	-0.04	0.972713	0.787435	0.829832	0	1.3	2.46996	4.45e-10	2.97e-08	1	0.29	1.22248	0.0325994	0.177374	0	0.25	1.18913	0.057057	0.12087	0	5.33429	6.34897	6.38888	6.63878	AGAP8	ArfGAP with GTPase domain, ankyrin repeat and PH domain 8	728404	NA	10
7927353	-1.35	0.392213	9.89e-07	2.84e-05	-1	-1.48	0.359727	7.74e-07	3.31e-06	-1	-0.12	0.917173	0.542412	0.613398	0	1.6	3.04061	8.06e-09	1.99e-07	1	0.25	1.19257	0.168649	0.4041	0	0.13	1.09379	0.462293	0.565692	0	5.72745	7.07774	7.20248	7.33181	AGAP8	ArfGAP with GTPase domain, ankyrin repeat and PH domain 8	728404	NA	10
7927552	-1.05	0.481759	2.47e-06	4.83e-05	-1	-1.14	0.453324	2.37e-06	7.95e-06	-1	-0.09	0.940977	0.60616	0.672002	0	1.35	2.541	6.79e-09	1.79e-07	1	0.29	1.22415	0.0616427	0.244335	0	0.2	1.15189	0.170643	0.269895	0	5.45079	6.50441	6.59218	6.79619	AGAP6	ArfGAP with GTPase domain, ankyrin repeat and PH domain 6	414189	NA	10
7927649	-1.02	0.493302	0.00643111	0.0134697	-1	-1.81	0.285937	4.41e-05	9.29e-05	-1	-0.79	0.579638	0.0277388	0.0543197	0	1.18	2.26851	0.000609384	0.00111634	1	0.16	1.11906	0.591349	0.779474	0	-0.62	0.64865	0.0388182	0.0911344	0	5.33247	6.35193	7.1387	6.51421	CISD1	CDGSH iron sulfur domain 1	55847	611932	10
7927732	-1.12	0.459947	7.3e-06	9.58e-05	-1	-1.79	0.289128	8.98e-09	1.36e-07	-1	-0.67	0.628612	0.00180643	0.00703709	0	1.41	2.65085	2.25e-08	4.01e-07	1	0.29	1.21925	0.104094	0.316335	0	-0.38	0.766435	0.0254579	0.0681281	0	5.37558	6.49604	7.1658	6.78203	ARID5B	AT rich interactive domain 5B (MRF1-like)	84159	608538	10
7927854	-1.05	0.482894	0.000481889	0.00178863	-1	-1.79	0.290028	1.61e-06	5.87e-06	-1	-0.74	0.600602	0.00886857	0.0226028	0	1.51	2.84586	1.13e-06	6.37e-06	1	0.46	1.37425	0.0556626	0.232235	0	-0.28	0.825377	0.221038	0.327464	0	6.82781	7.87803	8.61354	8.33667	HNRNPH3	heterogeneous nuclear ribonucleoprotein H3 (2H9)	3189	602324	10
7927926	-1	0.498643	0.000347426	0.00140604	-1	-1.57	0.335691	2.69e-06	8.79e-06	-1	-0.57	0.67321	0.0239232	0.0484536	0	1.23	2.35185	5.46e-06	2.15e-05	1	0.23	1.17273	0.283347	0.530445	0	-0.34	0.789495	0.103335	0.187044	0	5.42335	6.42727	6.99814	6.65715	DDX50	DEAD (Asp-Glu-Ala-Asp) box polypeptide 50	79009	610373	10
7928119	-2.59	0.165951	9.67e-10	5.43e-07	-1	-3.48	0.0893254	1.03e-11	2.75e-09	-1	-0.89	0.538262	0.00193266	0.00738411	0	2.37	5.18192	4.17e-10	2.88e-08	1	-0.22	0.859947	0.345849	0.59132	0	-1.11	0.462877	3.8e-05	0.000821902	-1	4.29968	6.89084	7.78446	6.67316	EIF4EBP2	eukaryotic translation initiation factor 4E binding protein 2	1979	602224	10
7928444	-1.02	0.492917	5.39e-05	0.000365775	-1	-1.27	0.414914	5.72e-06	1.63e-05	-1	-0.25	0.841752	0.22983	0.301114	0	1.2	2.29788	7.61e-07	4.77e-06	1	0.18	1.13266	0.326874	0.573083	0	-0.07	0.953421	0.690524	0.765606	0	4.96497	5.98556	6.23409	6.16528	VCL	vinculin	7414	193065, 611407	10
7928491	-1.23	0.426743	6.59e-05	0.000418166	-1	-1.86	0.276358	4.04e-07	2e-06	-1	-0.63	0.647599	0.0183371	0.0392255	0	1.74	3.32956	5.69e-08	7.62e-07	1	0.51	1.42087	0.0308117	0.172002	0	-0.12	0.920152	0.571057	0.666264	0	4.7316	5.96016	6.58699	6.46693	MYST4	MYST histone acetyltransferase (monocytic leukemia) 4	23522	605880	10
7928752	-1.34	0.393856	0.000200905	0.000939162	-1	-1.99	0.251635	2.81e-06	9.11e-06	-1	-0.65	0.6389	0.0416515	0.0744306	0	1.25	2.37442	9.71e-05	0.000228024	1	-0.1	0.935182	0.719198	0.85975	0	-0.74	0.597487	0.00788944	0.0299339	0	4.19173	5.53599	6.18233	5.43931	GHITM	growth hormone inducible transmembrane protein	27069	NA	10
7929116	-1.01	0.497063	4.96e-06	7.59e-05	-1	-1.83	0.280549	1.24e-10	9.7e-09	-1	-0.83	0.564413	3.3e-05	0.000472335	0	1.52	2.86303	1.37e-10	1.52e-08	1	0.51	1.42311	0.00190686	0.0439745	0	-0.32	0.803221	0.0235162	0.0641997	0	4.02777	5.03627	5.86145	5.54532	RPP30	ribonuclease P/MRP 30kDa subunit	10556	606115	10, 10
7929562	-1.08	0.471751	0.000501166	0.0018371	-1	-1.95	0.258918	7.44e-07	3.21e-06	-1	-0.87	0.548843	0.00358383	0.0116397	0	1.95	3.87493	2.43e-08	4.23e-07	1	0.87	1.828	0.00118249	0.0368258	0	0	1.00329	0.983551	0.988024	0	3.41285	4.49675	5.36229	5.36702	ZNF518A	zinc finger protein 518A	9849	NA	10
7929816	-1.84	0.279579	0.00156837	0.00439811	-1	-1.29	0.408134	0.0267501	0.0327589	-1	0.55	1.45982	0.293423	0.369304	0	1.64	3.11406	0.00132118	0.00223005	1	-0.2	0.870626	0.660346	0.823343	0	0.35	1.27095	0.432836	0.539675	0	5.5138	7.35247	6.80668	7.15259	SCD	stearoyl-CoA desaturase (delta-9-desaturase)	6319	604031	10
7930276	-1.08	0.473531	2.27e-05	0.000204254	-1	-1.86	0.275694	1.81e-08	2.21e-07	-1	-0.78	0.582208	0.00081675	0.00402771	0	1.4	2.63412	8.4e-08	9.88e-07	1	0.32	1.24734	0.0875981	0.291022	0	-0.46	0.72621	0.0139629	0.0443558	0	6.11668	7.19514	7.97554	7.514	SLK	STE20-like kinase (yeast)	9748	NA	10
7930304	-1.13	0.456985	1.49e-06	3.6e-05	-1	-1.22	0.428388	8.48e-07	3.54e-06	-1	-0.09	0.937421	0.589798	0.657349	0	1.11	2.15156	3.29e-07	2.59e-06	1	-0.02	0.983232	0.875218	0.943523	0	-0.12	0.921703	0.427166	0.534067	0	5.91154	7.04132	7.13455	7.01692	GSTO1	glutathione S-transferase omega 1	9446	605482	10
7930470	-1.24	0.422723	2.37e-08	3.76e-06	-1	-2.12	0.22999	5.34e-12	1.77e-09	-1	-0.88	0.544069	5.55e-06	0.000153454	0	1.51	2.85266	5.45e-11	8.96e-09	1	0.27	1.20588	0.0489312	0.21778	0	-0.61	0.656084	8.45e-05	0.00142859	0	5.24997	6.49218	7.37032	6.76227	SHOC2	soc-2 suppressor of clear homolog (C. elegans)	8036	602775	10
7930537	-1.66	0.316405	2.63e-07	1.38e-05	-1	-1.76	0.295221	1.47e-07	9.43e-07	-1	-0.1	0.933047	0.655895	0.717533	0	1.57	2.97434	3.36e-08	5.34e-07	1	-0.09	0.941096	0.662	0.824185	0	-0.19	0.878087	0.322194	0.434159	0	5.97784	7.63799	7.73797	7.5504	TCF7L2	transcription factor 7-like 2 (T-cell specific, HMG-box)	6934	125853, 602228	10
7930614	-1.23	0.425151	4.5e-07	1.79e-05	-1	-2.16	0.223095	8.38e-11	7.7e-09	-1	-0.93	0.524743	2.39e-05	0.000381043	0	1.77	3.4219	7e-11	1.08e-08	1	0.54	1.45482	0.00196629	0.0448677	0	-0.39	0.763408	0.0160289	0.0491199	0	3.83948	5.07343	6.00375	5.61428	NHLRC2	NHL repeat containing 2	374354	NA	10
7931187	-1.27	0.415813	0.000454031	0.00170844	-1	-2	0.249603	3.39e-06	1.06e-05	-1	-0.74	0.600277	0.0242543	0.048988	0	1.45	2.73392	2.15e-05	6.41e-05	1	0.18	1.1368	0.502265	0.716287	0	-0.55	0.682395	0.0452855	0.102002	0	4.72081	5.98681	6.72311	6.17179	BUB3	budding uninhibited by benzimidazoles 3 homolog (yeast)	9184	603719	10
7931293	-1.19	0.439041	0.000398159	0.00154555	-1	-2	0.249166	9.54e-07	3.88e-06	-1	-0.82	0.567523	0.00804734	0.0210797	0	1.76	3.377	4.13e-07	3.06e-06	1	0.57	1.48264	0.0333226	0.179521	0	-0.25	0.841434	0.307836	0.419622	0	5.15621	6.34379	7.16104	6.91196	DOCK1	dedicator of cytokinesis 1	1793	601403	10
7931728	-1.3	0.406536	8.14e-08	7.68e-06	-1	-1.71	0.306069	1.31e-09	4.18e-08	-1	-0.41	0.752872	0.0193195	0.0408869	0	1.4	2.64566	1.09e-09	5.28e-08	1	0.11	1.07556	0.473983	0.697698	0	-0.3	0.809755	0.0363519	0.0869694	0	4.73616	6.03471	6.44423	6.13979	LARP5	La ribonucleoprotein domain family, member 5	23185	NA	10
7931832	-1.36	0.390237	0.00388182	0.00895004	-1	-1.42	0.37361	0.00170723	0.00248525	-1	-0.06	0.957393	0.874621	0.90296	0	1.3	2.47006	0.000584681	0.00107704	1	-0.05	0.96391	0.883451	0.947678	0	-0.12	0.92284	0.71761	0.786937	0	5.57172	6.92929	6.99211	6.87626	AKR1C2	aldo-keto reductase family 1, member C2 (dihydrodiol dehydrogenase 2; bile acid binding protein; 3-alpha hydroxysteroid dehydrogenase, type III)	1646	600450	10
7931977	-1.12	0.461029	0.00214906	0.0055972	-1	-1.02	0.494233	0.00671587	0.00893189	-1	0.1	1.07202	0.755244	0.802759	0	1.14	2.21141	0.000470796	0.000892366	1	0.03	1.01952	0.922171	0.965177	0	0.13	1.09295	0.640065	0.724805	0	4.91152	6.02858	5.92825	6.05648	ITIH5	inter-alpha (globulin) inhibitor H5	80760	609783	10, 10, 10
7932554	-1.31	0.402788	6.68e-07	2.24e-05	-1	-1.45	0.365131	8.22e-08	6.1e-07	-1	-0.14	0.906509	0.442362	0.51889	0	1.44	2.72208	2.85e-09	9.85e-08	1	0.13	1.09642	0.425443	0.658433	0	-0.01	0.993916	0.952996	0.96761	0	5.06702	6.37893	6.52053	6.51173	ARHGAP21	Rho GTPase activating protein 21	57584	609870	10
7932885	-1.97	0.255208	3.32e-10	3.03e-07	-1	-2.92	0.132564	8.54e-13	6.76e-10	-1	-0.94	0.519433	4.08e-05	0.000541553	0	2.61	6.10478	1.33e-13	2.52e-10	1	0.64	1.55799	0.000724759	0.0300088	0	-0.31	0.809272	0.0686035	0.13785	0	4.01667	5.98692	6.93191	6.62661	ARHGAP12	Rho GTPase activating protein 12	94134	610577	10
7932964	-1.11	0.464858	0.0029231	0.00713862	-1	-1.71	0.304965	9.16e-05	0.000175747	-1	-0.61	0.656038	0.0804924	0.126964	0	1.64	3.11609	1.13e-05	3.78e-05	1	0.53	1.44854	0.0800399	0.278016	0	-0.07	0.950297	0.798702	0.850026	0	3.54558	4.65072	5.25887	5.18532	C1D	C1D nuclear receptor co-repressor	10438	606997	2
7932966	-1.52	0.349011	0.000182323	0.000871815	-1	-1.83	0.280542	3.91e-05	8.39e-05	-1	-0.32	0.803819	0.35699	0.435374	0	1.96	3.89995	1.08e-06	6.19e-06	1	0.44	1.36113	0.149185	0.379771	0	0.13	1.0941	0.653785	0.7363	0	4.81645	6.3351	6.65016	6.7799	ITGB1	integrin, beta 1 (fibronectin receptor, beta polypeptide, antigen CD29 includes MDF2, MSK12)	3688	135630	10, 10, 10, 10
7932985	-1.13	0.457386	7.41e-08	7.35e-06	-1	-1.48	0.359631	1.09e-09	3.69e-08	-1	-0.35	0.786274	0.020892	0.0435239	0	1.54	2.90166	1.07e-11	3.2e-09	1	0.41	1.32718	0.00337945	0.0583583	0	0.06	1.04353	0.604364	0.69445	0	4.40482	5.53333	5.88023	5.9417	NRP1	neuropilin 1	8829	602069	10, 10
7933115	-1.1	0.465839	0.000131804	0.000689024	-1	-1.95	0.258665	1.56e-07	9.81e-07	-1	-0.85	0.555268	0.00182073	0.00707515	0	1.77	3.40472	2.8e-08	4.7e-07	1	0.67	1.58605	0.00459478	0.0670259	0	-0.18	0.880682	0.383268	0.493185	0	4.7375	5.83959	6.68834	6.50503	CDC10L	CDC10 cell division cycle 10 homolog (S. cerevisiae)-like	285961	NA	10
7933145	-1.61	0.327638	0.00182534	0.00491452	-1	-2.56	0.169399	2.34e-05	5.4e-05	-1	-0.95	0.517031	0.0456575	0.0800452	0	2.28	4.86102	9.34e-06	3.27e-05	1	0.67	1.59265	0.107719	0.320677	0	-0.28	0.82345	0.472469	0.574707	0	4.83741	6.44723	7.39891	7.11867	---	---	NA	NA
7933252	-1.3	0.407513	5.22e-07	1.97e-05	-1	-1.39	0.381702	5.08e-07	2.38e-06	-1	-0.09	0.936662	0.615036	0.679842	0	1.59	3.01343	1.83e-09	7.46e-08	1	0.3	1.22801	0.0840249	0.285138	0	0.2	1.15023	0.215366	0.32095	0	5.28492	6.58	6.6744	6.87632	AGAP8	ArfGAP with GTPase domain, ankyrin repeat and PH domain 8	728404	NA	10
7933331	-1.35	0.392213	9.89e-07	2.84e-05	-1	-1.48	0.359727	7.74e-07	3.31e-06	-1	-0.12	0.917173	0.542412	0.613398	0	1.6	3.04061	8.06e-09	1.99e-07	1	0.25	1.19257	0.168649	0.4041	0	0.13	1.09379	0.462293	0.565692	0	5.72745	7.07774	7.20248	7.33181	AGAP8	ArfGAP with GTPase domain, ankyrin repeat and PH domain 8	728404	NA	10
7933405	-1.06	0.478278	2.68e-06	5.08e-05	-1	-1.23	0.427583	1.14e-06	4.42e-06	-1	-0.16	0.894006	0.354881	0.433333	0	1.4	2.64239	5.35e-09	1.53e-07	1	0.34	1.2638	0.0359352	0.186767	0	0.18	1.12984	0.24485	0.353234	0	5.38917	6.45325	6.61489	6.79102	AGAP8	ArfGAP with GTPase domain, ankyrin repeat and PH domain 8	728404	NA	10
7933427	-1.04	0.487211	2.18e-06	4.5e-05	-1	-1.13	0.456013	1.87e-06	6.57e-06	-1	-0.1	0.935965	0.565984	0.635578	0	1.31	2.48688	7.73e-09	1.94e-07	1	0.28	1.21163	0.0693743	0.260326	0	0.18	1.13405	0.211185	0.316736	0	5.64812	6.6855	6.78097	6.96245	AGAP8	ArfGAP with GTPase domain, ankyrin repeat and PH domain 8	728404	NA	10
7933574	-1.22	0.430578	4.29e-07	1.74e-05	-1	-1.32	0.399809	1.97e-07	1.16e-06	-1	-0.11	0.92854	0.531719	0.603616	0	1.48	2.7945	8.29e-10	4.47e-08	1	0.27	1.20325	0.0886271	0.292595	0	0.16	1.11727	0.271123	0.38098	0	5.32229	6.53794	6.64491	6.80488	AGAP7	ArfGAP with GTPase domain, ankyrin repeat and PH domain 7	653268	NA	10
7933760	-1.29	0.407559	8.56e-06	0.000106855	-1	-2.1	0.23321	1.99e-08	2.35e-07	-1	-0.81	0.572211	0.00181019	0.00704925	0	1.46	2.7459	3.91e-07	2.94e-06	1	0.16	1.11911	0.428176	0.660355	0	-0.64	0.640369	0.00352461	0.0172769	0	5.8836	7.17852	7.9839	7.34088	CCDC6	coiled-coil domain containing 6	8030	188550, 601985	10
7933976	-1.35	0.392278	2.9e-05	0.000238869	-1	-1.56	0.340013	8.89e-06	2.36e-05	-1	-0.21	0.866764	0.425586	0.503745	0	1.61	3.06307	3.82e-07	2.89e-06	1	0.26	1.20157	0.256173	0.504033	0	0.06	1.04148	0.789408	0.842842	0	6.90979	8.25984	8.46613	8.52477	---	---	NA	NA
7934122	-1.71	0.305941	4.13e-06	6.76e-05	-1	-2.59	0.165724	1.45e-08	1.88e-07	-1	-0.88	0.541687	0.00443617	0.0136328	0	1.89	3.70531	1.12e-07	1.22e-06	1	0.18	1.1336	0.47304	0.696404	0	-0.7	0.614059	0.00727952	0.028358	0	5.10186	6.81053	7.695	6.99145	SAR1A	SAR1 homolog A (S. cerevisiae)	56681	607691	10
7934196	-1.64	0.321936	1.89e-07	1.17e-05	-1	-2.04	0.242979	5.81e-09	1.02e-07	-1	-0.41	0.754743	0.0695566	0.112724	0	1.41	2.66425	1.42e-07	1.43e-06	1	-0.22	0.85772	0.260335	0.508074	0	-0.63	0.647358	0.00194771	0.0116788	0	5.67399	7.30914	7.71509	7.08772	PSAP	prosaposin	5660	176801, 249900, 610539, 611721, 611722	10
7934301	-1.1	0.466739	4.35e-05	0.000315522	-1	-1.88	0.27176	3.05e-08	3.11e-07	-1	-0.78	0.582252	0.0013458	0.00578034	0	1.33	2.50741	3.01e-07	2.43e-06	1	0.23	1.17031	0.241849	0.488118	0	-0.55	0.681415	0.00543888	0.0233329	0	4.78535	5.88466	6.66494	6.11155	ECD	ecdysoneless homolog (Drosophila)	11319	NA	10
7934451	-1.12	0.461198	8.69e-07	2.65e-05	-1	-1.24	0.424311	3.77e-07	1.89e-06	-1	-0.12	0.92002	0.468514	0.545228	0	1.44	2.71711	9.35e-10	4.72e-08	1	0.33	1.25312	0.0350333	0.184312	0	0.21	1.1529	0.151706	0.247582	0	5.35498	6.47153	6.59179	6.79705	AGAP7	ArfGAP with GTPase domain, ankyrin repeat and PH domain 7	653268	NA	10
7934513	-1.09	0.471381	0.000142406	0.00073297	-1	-2	0.249415	4.81e-08	4.18e-07	-1	-0.92	0.529114	0.000681645	0.00354812	0	1.43	2.69837	4.91e-07	3.47e-06	1	0.35	1.27196	0.108257	0.321479	0	-0.57	0.673013	0.00841425	0.0313186	0	4.61484	5.69988	6.61823	6.04693	AP3M1	adaptor-related protein complex 3, mu 1 subunit	26985	610366	10
7934870	-1.17	0.443029	0.000917046	0.00290895	-1	-2.07	0.237605	2.31e-06	7.8e-06	-1	-0.9	0.536319	0.00751288	0.0200253	0	1.28	2.43447	9.08e-05	0.00021551	1	0.11	1.07854	0.690421	0.840891	0	-0.79	0.578442	0.0062013	0.0252877	0	3.73961	4.91414	5.81297	5.02322	ATAD1	ATPase family, AAA domain containing 1	84896	NA	10
7934906	-1.96	0.25645	0.000840508	0.0027271	-1	-1.77	0.293925	0.00316045	0.00440537	-1	0.2	1.14613	0.697947	0.753805	0	2.35	5.10611	2.4e-05	7.01e-05	1	0.39	1.30946	0.392963	0.633926	0	0.59	1.50081	0.1822	0.283119	0	6.88502	8.84827	8.6515	9.23724	ACTA2	actin, alpha 2, smooth muscle, aorta	59	102620, 611788	10, 10
7935002	-1.56	0.339912	4.97e-06	7.59e-05	-1	-2.09	0.235133	1.29e-07	8.51e-07	-1	-0.53	0.691747	0.0503451	0.0865831	0	1.68	3.20804	2.44e-07	2.08e-06	1	0.12	1.09045	0.592055	0.780084	0	-0.41	0.754317	0.0771263	0.150387	0	5.36695	6.92371	7.4554	7.04864	SRP9	signal recognition particle 9kDa	6726	600707	1
7935180	-1.09	0.468582	1.96e-05	0.000185166	-1	-1.74	0.299683	2.69e-08	2.85e-07	-1	-0.64	0.639552	0.00344987	0.0113007	0	1.24	2.36192	6.05e-07	4.03e-06	1	0.15	1.10676	0.422355	0.655325	0	-0.5	0.707827	0.00699122	0.0276031	0	6.33924	7.43286	8.07773	7.5792	PDLIM1	PDZ and LIM domain 1	9124	605900	10
7935188	-1.52	0.349777	5.62e-06	8.2e-05	-1	-1.5	0.353769	9.65e-06	2.53e-05	-1	0.02	1.01141	0.948154	0.961792	0	1.61	3.06158	2.16e-07	1.91e-06	1	0.1	1.07087	0.662508	0.824346	0	0.12	1.08309	0.588793	0.682079	0	4.73171	6.2472	6.23083	6.34598	SORBS1	sorbin and SH3 domain containing 1	10580	605264	10, 10
7935228	-2.3	0.203609	0.00986676	0.0190824	-1	-2.69	0.155291	0.00478598	0.00649882	-1	-0.39	0.762695	0.630949	0.694762	0	2.72	6.585	0.000863986	0.00152548	1	0.42	1.34076	0.559335	0.760434	0	0.03	1.02259	0.962738	0.974055	0	3.35416	5.65028	6.04111	6.07334	---	---	NA	NA
7935776	-2.74	0.149321	0.000541089	0.00194689	-1	-3.15	0.112803	0.000236662	0.000408616	-1	-0.4	0.755438	0.553031	0.623279	0	3.25	9.53287	1.76e-05	5.44e-05	1	0.51	1.42346	0.403722	0.641158	0	0.1	1.07534	0.856674	0.894309	0	6.04453	8.78804	9.19265	9.29744	SCD	stearoyl-CoA desaturase (delta-9-desaturase)	6319	604031	10
7935968	-1.24	0.423183	0.0082867	0.0165658	-1	-1.67	0.313202	0.00121538	0.00181419	-1	-0.43	0.740109	0.315199	0.392688	0	1.81	3.49501	8.12e-05	0.00019572	1	0.56	1.47903	0.147903	0.37792	0	0.13	1.09464	0.7206	0.789267	0	5.57196	6.81261	7.2468	7.37726	LDB1	LIM domain binding 1	8861	603451	10, 10
7936064	-1.5	0.354188	4.6e-06	7.27e-05	-1	-1.97	0.255471	2.66e-07	1.45e-06	-1	-0.47	0.721288	0.0725953	0.116731	0	1.62	3.07427	1.84e-07	1.7e-06	1	0.12	1.08887	0.580449	0.772731	0	-0.35	0.785387	0.11788	0.205084	0	3.69795	5.19537	5.66672	5.3182	NT5C2	5'-nucleotidase, cytosolic II	22978	600417	10
7936091	-2.55	0.170335	0.000169943	0.000832289	-1	-3.8	0.0718092	2.02e-06	7e-06	-1	-1.25	0.421577	0.0360629	0.0665773	0	2.91	7.49541	7.1e-06	2.64e-05	1	0.35	1.27673	0.487305	0.70734	0	-0.89	0.53824	0.0740156	0.145777	0	5.1086	7.66216	8.90829	8.01461	USMG5	up-regulated during skeletal muscle growth 5 homolog (mouse)	84833	NA	10
7936322	-1.42	0.374954	0.00449739	0.0100655	-1	-1.73	0.30085	0.000940434	0.00143633	-1	-0.32	0.802366	0.47063	0.547282	0	2.24	4.73031	3.4e-06	1.48e-05	1	0.83	1.77365	0.0430593	0.204827	0	0.51	1.42311	0.170692	0.269903	0	2.99309	4.40831	4.72598	5.23503	GPAM	glycerol-3-phosphate acyltransferase, mitochondrial	57678	602395	10
7936734	-1.19	0.438276	8.26e-05	0.000490093	-1	-1.97	0.254679	1.11e-07	7.63e-07	-1	-0.78	0.581092	0.00379501	0.0121308	0	1.63	3.10366	1.05e-07	1.16e-06	1	0.44	1.36026	0.0520343	0.224285	0	-0.34	0.790435	0.111388	0.197372	0	5.16016	6.35025	7.13341	6.79413	FGFR2	fibroblast growth factor receptor 2	2263	101200, 101400, 101600, 123150, 123500, 123790, 137215, 149730, 176943, 207410, 609579	10, 10, 10, 10, 10, 10, 10
7937772	-2.63	0.161911	5.59e-07	2.04e-05	-1	-1.97	0.254553	4.96e-05	0.000102691	-1	0.65	1.57218	0.092026	0.141624	0	2.66	6.31951	3.39e-08	5.36e-07	1	0.03	1.0232	0.92107	0.964758	0	0.69	1.60865	0.0391002	0.0916672	0	4.37114	6.99787	6.34511	7.03096	IGF2	insulin-like growth factor 2 (somatomedin A)	3481	147470	11, 11, 11
7938154	-1.44	0.367714	2.26e-05	0.000203792	-1	-1.4	0.379807	5.58e-05	0.000113569	-1	0.05	1.03289	0.861569	0.892429	0	1.5	2.83235	1.69e-06	8.61e-06	1	0.06	1.04149	0.806374	0.905788	0	0.11	1.07574	0.64285	0.726905	0	5.07753	6.52088	6.4742	6.57953	ILK	integrin-linked kinase	3611	602366	11, 11
7938286	-1.08	0.473147	0.000303674	0.00126998	-1	-1.59	0.331326	5e-06	1.46e-05	-1	-0.51	0.70026	0.0511669	0.0878255	0	1.09	2.13057	6.03e-05	0.000151191	1	0.01	1.00807	0.958821	0.982582	0	-0.5	0.705913	0.0272418	0.0712733	0	6.42699	7.50663	8.02067	7.51823	RPL27A	ribosomal protein L27a	6157	603637	11
7938370	-1.19	0.439054	0.000288822	0.00122369	-1	-1.68	0.312722	9.55e-06	2.51e-05	-1	-0.49	0.712264	0.0878185	0.13624	0	1.38	2.61097	9.37e-06	3.27e-05	1	0.2	1.14636	0.426643	0.659618	0	-0.29	0.816509	0.224521	0.331161	0	6.16937	7.3569	7.84641	7.55395	SWAP70	SWAP-70 protein	23075	604762	11
7938528	-2.31	0.202299	7.58e-07	2.39e-05	-1	-2.43	0.185653	8.23e-07	3.47e-06	-1	-0.12	0.917718	0.715416	0.768686	0	2.18	4.53667	2.71e-07	2.25e-06	1	-0.12	0.917762	0.683319	0.836248	0	-0.25	0.842247	0.397295	0.507199	0	4.50493	6.81037	6.93425	6.68656	PARVA	parvin, alpha	55742	608120	11
7938544	-1.45	0.366657	6e-06	8.45e-05	-1	-2.16	0.224426	3.09e-08	3.13e-07	-1	-0.71	0.612087	0.00794882	0.0208766	0	1.82	3.52441	2.35e-08	4.12e-07	1	0.37	1.29225	0.101027	0.311998	0	-0.34	0.790968	0.116777	0.203717	0	5.0622	6.50969	7.21788	6.87958	TEAD1	TEA domain family member 1 (SV40 transcriptional enhancer factor)	7003	108985, 189967	11
7938669	-1.19	0.437661	0.000212344	0.000977319	-1	-1.59	0.332529	1.74e-05	4.21e-05	-1	-0.4	0.759787	0.155931	0.219001	0	1.39	2.62573	8.65e-06	3.08e-05	1	0.2	1.14918	0.411198	0.647104	0	-0.2	0.873132	0.40887	0.517543	0	6.36	7.55212	7.94845	7.75272	C11orf58	chromosome 11 open reading frame 58	10944	NA	11
7938777	-1.64	0.321779	5.23e-05	0.000359022	-1	-2.55	0.170592	1.38e-07	8.99e-07	-1	-0.92	0.530151	0.00881677	0.0225178	0	1.82	3.51975	1.4e-06	7.49e-06	1	0.18	1.13258	0.535237	0.742086	0	-0.74	0.60044	0.011802	0.0394277	0	5.98049	7.61635	8.53187	7.79596	LDHA	lactate dehydrogenase A	3939	150000	11
7939434	-1.09	0.469025	0.000105346	0.00058872	-1	-1.74	0.299958	2.98e-07	1.59e-06	-1	-0.64	0.639536	0.00942462	0.023634	0	1.73	3.3147	1.51e-08	3.02e-07	1	0.64	1.55468	0.00478305	0.0682553	0	-0.01	0.994272	0.96594	0.976391	0	5.25629	6.34855	6.99346	6.98517	TTC17	tetratricopeptide repeat domain 17	55761	NA	11
7940066	-1.76	0.296073	2.77e-07	1.39e-05	-1	-1.94	0.260565	8.21e-08	6.1e-07	-1	-0.18	0.88007	0.441555	0.518447	0	1.47	2.76373	3.58e-07	2.75e-06	1	-0.29	0.818266	0.18357	0.421948	0	-0.47	0.720131	0.02546	0.0681281	0	5.88152	7.63749	7.8218	7.34813	TMX2	thioredoxin-related transmembrane protein 2	51075	NA	11
7941936	-1.94	0.260201	5.72e-06	8.27e-05	-1	-2.15	0.224668	1.87e-06	6.57e-06	-1	-0.21	0.863439	0.513335	0.586094	0	1.54	2.90969	1.6e-05	5.01e-05	1	-0.4	0.757104	0.174919	0.412165	0	-0.61	0.653713	0.0323941	0.0801901	0	6.71902	8.66132	8.87315	8.25988	GSTP1	glutathione S-transferase pi 1	2950	134660	11
7941946	-1.42	0.374089	1.2e-06	3.18e-05	-1	-1.11	0.46357	6.5e-05	0.000129884	-1	0.31	1.2392	0.158238	0.221574	0	1.17	2.24528	2.59e-06	1.2e-05	1	-0.25	0.839935	0.195629	0.435861	0	0.06	1.04084	0.751273	0.813247	0	6.48413	7.90268	7.59327	7.65103	NDUFV1	NADH dehydrogenase (ubiquinone) flavoprotein 1, 51kDa	4723	161015, 203450, 252010, 256000	11
7942174	-1.26	0.416355	2.03e-06	4.29e-05	-1	-1.47	0.36194	4.96e-07	2.33e-06	-1	-0.2	0.869305	0.314002	0.391568	0	1.53	2.87789	1.17e-08	2.48e-07	1	0.26	1.19822	0.149379	0.38	0	0.06	1.04162	0.728227	0.795786	0	5.48056	6.74468	6.94674	7.00557	PPFIA1	protein tyrosine phosphatase, receptor type, f polypeptide (PTPRF), interacting protein (liprin), alpha 1	8500	611054	11, 11
7943160	-1.29	0.408778	0.00832184	0.0166178	-1	-1.23	0.426616	0.0193352	0.0240941	-1	0.06	1.04364	0.892068	0.917263	0	1.41	2.66364	0.00200364	0.00323991	1	0.12	1.08884	0.759949	0.882605	0	0.18	1.13635	0.639512	0.724404	0	8.90833	10.1989	10.1373	10.3217	SCARNA9	small Cajal body-specific RNA 9	619383	NA	11
7943424	-1.03	0.488796	4.66e-05	0.000332081	-1	-1.77	0.293744	5.2e-08	4.44e-07	-1	-0.73	0.600954	0.00158326	0.0064553	0	1.59	3.00768	1.35e-08	2.78e-07	1	0.56	1.47014	0.00562842	0.0753974	0	-0.18	0.883486	0.318983	0.431054	0	4.62969	5.66238	6.39706	6.21834	BIRC2	baculoviral IAP repeat-containing 2	329	601712	11
7944011	-1.4	0.38011	2.85e-06	5.31e-05	-1	-2.34	0.19752	8.73e-10	3.26e-08	-1	-0.94	0.519641	0.000269954	0.00185369	0	1.67	3.17277	1.04e-08	2.3e-07	1	0.27	1.206	0.179179	0.418149	0	-0.67	0.626686	0.00130523	0.00897893	0	4.7415	6.13701	7.08143	6.40724	REXO2	REX2, RNA exonuclease 2 homolog (S. cerevisiae)	25996	607149	11
7944223	-1.41	0.375491	2.4e-06	4.73e-05	-1	-1.98	0.253973	2.39e-08	2.63e-07	-1	-0.56	0.676375	0.0179185	0.0384883	0	2.03	4.07367	5.53e-10	3.37e-08	1	0.61	1.52963	0.00503921	0.0700326	0	0.05	1.0346	0.795731	0.847762	0	5.4322	6.84535	7.40946	7.45853	MLL	myeloid/lymphoid or mixed-lineage leukemia (trithorax homolog, Drosophila)	4297	159555	11
7945182	-2.15	0.226079	1.14e-08	2.5e-06	-1	-2.46	0.181907	2.57e-09	6.13e-08	-1	-0.31	0.804618	0.206214	0.274893	0	2.16	4.48015	1.35e-09	6.02e-08	1	0.02	1.01287	0.932875	0.970428	0	-0.3	0.814971	0.166614	0.265451	0	5.8553	8.0004	8.31403	8.01885	APLP2	amyloid beta (A4) precursor-like protein 2	334	104776	11
7946439	-1.07	0.475637	0.000419362	0.00161126	-1	-1.98	0.252648	2.61e-07	1.43e-06	-1	-0.91	0.531179	0.00167006	0.00668208	0	1.16	2.24096	4.39e-05	0.000115855	1	0.09	1.06588	0.691233	0.841014	0	-0.82	0.566173	0.00107001	0.00784532	0	5.31501	6.38708	7.29981	6.47912	TMEM9B	TMEM9 domain family, member B	56674	NA	11
7946559	-1.44	0.369085	7.22e-05	0.0004451	-1	-1.44	0.369502	0.000162496	0.000292049	-1	0	1.00113	0.995638	0.996276	0	1.56	2.95043	4.82e-06	1.95e-05	1	0.12	1.08896	0.641816	0.813051	0	0.12	1.09019	0.626067	0.712721	0	5.26227	6.70025	6.69862	6.8232	GNG10	guanine nucleotide binding protein (G protein), gamma 10	2790	604389	9
7946569	-1.77	0.292795	1.6e-07	1.04e-05	-1	-2.49	0.17776	2.38e-09	5.86e-08	-1	-0.72	0.607115	0.00631874	0.0176638	0	1.96	3.89015	2.99e-09	1.02e-07	1	0.19	1.13902	0.375673	0.617964	0	-0.53	0.691514	0.0164606	0.0500503	0	4.45329	6.22533	6.94528	6.41312	RNF141	ring finger protein 141	50862	NA	11
7946815	-1.08	0.472256	0.000233138	0.0010496	-1	-1.83	0.281221	7.31e-07	3.17e-06	-1	-0.75	0.595484	0.00633044	0.0176796	0	1.72	3.3055	5.6e-08	7.54e-07	1	0.64	1.56104	0.00718522	0.0840018	0	-0.11	0.929575	0.624795	0.711665	0	4.43812	5.52048	6.26835	6.16299	PIK3C2A	phosphoinositide-3-kinase, class 2, alpha polypeptide	5286	603601	11
7947425	-1.88	0.271002	0.000157041	0.000784557	-1	-2.5	0.176974	8.5e-06	2.27e-05	-1	-0.61	0.653034	0.145581	0.207207	0	1.96	3.89826	1.67e-05	5.2e-05	1	0.08	1.05644	0.829386	0.917961	0	-0.54	0.68989	0.135756	0.227339	0	6.17976	8.06338	8.67815	8.14259	CD59	CD59 molecule, complement regulatory protein	966	107271, 612300	11, 11, 11
7947934	-2.16	0.223437	8.59e-07	2.63e-05	-1	-2.65	0.159046	7.98e-08	5.97e-07	-1	-0.49	0.711815	0.135568	0.195699	0	2.08	4.21419	2.01e-07	1.81e-06	1	-0.09	0.941609	0.761054	0.883053	0	-0.58	0.670251	0.0436645	0.099302	0	5.02653	7.18859	7.67902	7.10179	MTCH2	mitochondrial carrier homolog 2 (C. elegans)	23788	NA	11
7948606	-2.49	0.178525	3.45e-07	1.61e-05	-1	-3.18	0.110074	7.45e-09	1.19e-07	-1	-0.7	0.616579	0.0499058	0.0859433	0	2.15	4.44336	2.7e-07	2.25e-06	1	-0.33	0.793249	0.281873	0.528954	0	-1.03	0.4891	0.00139647	0.0094111	-1	6.41263	8.89844	9.59608	8.56428	C11orf10	chromosome 11 open reading frame 10	746	NA	11
7948679	-1.45	0.366162	8.32e-07	2.57e-05	-1	-2.2	0.218232	7.71e-10	3.05e-08	-1	-0.75	0.595997	0.00149352	0.00619789	0	1.43	2.69595	7.58e-08	9.34e-07	1	-0.02	0.987155	0.921351	0.96496	0	-0.77	0.588342	0.000203695	0.0026042	0	7.0596	8.50904	9.25567	8.49039	EEF1G	eukaryotic translation elongation factor 1 gamma	1937	130593	11
7948814	-1.01	0.497241	5.93e-05	0.000391265	-1	-1.45	0.365579	1.21e-06	4.64e-06	-1	-0.44	0.735215	0.0405241	0.0729167	0	1.02	2.02196	1.27e-05	4.16e-05	1	0.01	1.0054	0.966051	0.985618	0	-0.44	0.739188	0.0209426	0.0591077	0	6.97116	7.97915	8.42291	7.98692	HNRNPUL2	heterogeneous nuclear ribonucleoprotein U-like 2	221092	NA	11
7948839	-1.38	0.384376	0.000638576	0.00220476	-1	-1.66	0.317238	0.000162175	0.000291616	-1	-0.28	0.825332	0.427063	0.505109	0	1.57	2.97875	3.11e-05	8.67e-05	1	0.2	1.14496	0.528378	0.736696	0	-0.08	0.944972	0.781717	0.836346	0	6.57624	7.95565	8.2326	8.15094	NXF1	nuclear RNA export factor 1	10482	602647	11
7948995	-1.43	0.371469	0.00149345	0.00422706	-1	-1.85	0.278029	0.000277619	0.000472174	-1	-0.42	0.748458	0.302212	0.379143	0	1.26	2.39477	0.00137039	0.00230316	1	-0.17	0.889585	0.631064	0.805864	0	-0.59	0.665818	0.0972616	0.178533	0	5.41646	6.84514	7.26315	6.67635	ATL3	atlastin GTPase 3	25923	609369	11
7949995	-1.42	0.374211	0.000598866	0.00209949	-1	-1.67	0.313575	0.00019583	0.00034515	-1	-0.26	0.837962	0.474799	0.551368	0	1.38	2.60031	0.000198641	0.000421702	1	-0.04	0.973066	0.900607	0.956646	0	-0.29	0.815393	0.335393	0.447915	0	5.15846	6.57654	6.83158	6.53715	MRPL21	mitochondrial ribosomal protein L21	219927	611834	11
7950606	-1.33	0.3969	0.0002799	0.00119609	-1	-2.02	0.247335	4.48e-06	1.33e-05	-1	-0.68	0.623166	0.0382778	0.0698872	0	1.88	3.68165	8.64e-07	5.23e-06	1	0.55	1.46125	0.0591978	0.23993	0	-0.14	0.9106	0.617892	0.705913	0	5.14397	6.47712	7.15943	7.02432	RSF1	remodeling and spacing factor 1	51773	608522	11
7950644	-2.1	0.23277	2.49e-05	0.000216374	-1	-2.72	0.151635	1.11e-06	4.32e-06	-1	-0.62	0.651436	0.124591	0.182904	0	1.61	3.05453	0.000105715	0.000245605	1	-0.49	0.711004	0.170385	0.406269	0	-1.11	0.463174	0.00261909	0.0143172	-1	5.02491	7.12793	7.74624	6.63586	NDUFC2	NADH dehydrogenase (ubiquinone) 1, subcomplex unknown, 2, 14.5kDa	4718	603845	11
7950796	-1.11	0.463117	5.42e-06	8e-05	-1	-1.46	0.362481	2.09e-07	1.21e-06	-1	-0.35	0.782698	0.0691401	0.112219	0	1.65	3.14157	5.08e-10	3.25e-08	1	0.54	1.45491	0.00303597	0.0554921	0	0.19	1.13876	0.244076	0.352311	0	5.07383	6.18438	6.53785	6.72531	CREBZF	CREB/ATF bZIP transcription factor	58487	606444	11
7950983	-1.94	0.259819	1.28e-06	3.28e-05	-1	-2.05	0.24229	1.42e-06	5.27e-06	-1	-0.1	0.932533	0.734032	0.785021	0	1.86	3.64	3.44e-07	2.68e-06	1	-0.08	0.945741	0.760625	0.883007	0	-0.18	0.881935	0.476193	0.57803	0	4.29343	6.23785	6.33862	6.15737	CHORDC1	cysteine and histidine-rich domain (CHORD)-containing 1	26973	604353	11
7951034	-1.35	0.392111	1.13e-05	0.00012847	-1	-2.13	0.228477	3e-08	3.07e-07	-1	-0.78	0.582684	0.00350862	0.0114486	0	1.77	3.41593	1.77e-08	3.39e-07	1	0.42	1.33943	0.0569729	0.235541	0	-0.36	0.780461	0.0920561	0.171396	0	3.5877	4.93836	5.71758	5.35998	SNORA8	small nucleolar RNA, H/ACA box 8	654320	NA	11
7951036	-2.13	0.2286	2.29e-06	4.58e-05	-1	-3.09	0.117689	1.27e-08	1.73e-07	-1	-0.96	0.514826	0.00850246	0.0219925	0	3.06	8.31601	4.03e-10	2.86e-08	1	0.93	1.90104	0.00465715	0.0674269	0	-0.03	0.978704	0.912938	0.939231	0	3.47969	5.6088	6.56664	6.53559	SNORD5	small nucleolar RNA, C/D box 5	692072	NA	11
7951068	-1.37	0.387861	0.000302508	0.00126694	-1	-2.28	0.206599	7.59e-07	3.26e-06	-1	-0.91	0.532663	0.00839555	0.0217572	0	1.43	2.69343	3.66e-05	9.93e-05	1	0.06	1.04468	0.824152	0.915459	0	-0.85	0.556461	0.00442204	0.0202502	0	5.01126	6.37764	7.28635	6.4407	CWC15	CWC15 spliceosome-associated protein homolog (S. cerevisiae)	51503	NA	11
7951447	-1.53	0.345095	1.12e-07	8.57e-06	-1	-2.07	0.237973	2.51e-09	6.02e-08	-1	-0.54	0.689589	0.0137258	0.0314741	0	2.1	4.29836	9.57e-11	1.19e-08	1	0.57	1.48334	0.00440763	0.0660844	0	0.03	1.02289	0.852628	0.891447	0	4.11234	5.64727	6.18347	6.21612	CWF19L2	CWF19-like 2, cell cycle control (S. pombe)	143884	NA	11
7951554	-2.19	0.218782	1.01e-08	2.34e-06	-1	-3.03	0.122695	1.31e-10	1.01e-08	-1	-0.83	0.560812	0.0028641	0.00979203	0	2.8	6.95087	2.53e-11	5.3e-09	1	0.6	1.52072	0.0124728	0.110136	0	-0.23	0.852839	0.299612	0.411463	0	4.61759	6.81003	7.64444	7.41479	RDX	radixin	5962	179410, 611022	11
7951662	-3.04	0.121298	1.24e-07	9.01e-06	-1	-3.63	0.080679	1.22e-08	1.68e-07	-1	-0.59	0.66513	0.14636	0.208071	0	2.98	7.88251	1.78e-08	3.39e-07	1	-0.06	0.956134	0.855216	0.932785	0	-0.65	0.635953	0.0616905	0.127764	0	6.02883	9.0722	9.66049	9.00748	CRYAB	crystallin, alpha B	1410	123590, 608810	11
7952325	-1.72	0.304396	6.25e-06	8.68e-05	-1	-2.18	0.221168	1.66e-07	1.02e-06	-1	-0.46	0.726579	0.113133	0.168712	0	1.67	3.18054	6.14e-07	4.07e-06	1	-0.05	0.968143	0.854812	0.932602	0	-0.51	0.703432	0.0394775	0.0923648	0	7.66715	9.38313	9.84394	9.33642	HSPA8	heat shock 70kDa protein 8	3312	600816	11
7952953	-1	0.499291	7.03e-06	9.32e-05	-1	-1.82	0.283094	1.86e-09	5.07e-08	-1	-0.82	0.566991	9.76e-05	0.000945492	0	1.15	2.21388	1.58e-07	1.52e-06	1	0.14	1.10537	0.351682	0.596084	0	-0.67	0.626737	0.000159983	0.00219971	0	5.62414	6.62618	7.44479	6.77072	WNK1	WNK lysine deficient protein kinase 1	65125	145260, 201300, 605232	12
7953021	-1.46	0.362995	3.36e-05	0.000263615	-1	-1.75	0.298259	8.25e-06	2.22e-05	-1	-0.28	0.821661	0.32454	0.402444	0	1.21	2.30665	8.57e-05	0.00020486	1	-0.26	0.837301	0.316491	0.562166	0	-0.54	0.687978	0.0358552	0.086177	0	4.04508	5.50705	5.79044	5.25087	ADIPOR2	adiponectin receptor 2	79602	607946	12
7953243	-1.23	0.427548	2.02e-06	4.29e-05	-1	-1.54	0.343052	1.42e-07	9.2e-07	-1	-0.32	0.802372	0.109535	0.164153	0	1.05	2.07051	2.87e-06	1.29e-05	1	-0.18	0.885243	0.310632	0.556169	0	-0.49	0.710294	0.00605312	0.0249617	0	6.03749	7.26334	7.58099	7.08748	NDUFA9	NADH dehydrogenase (ubiquinone) 1 alpha subcomplex, 9, 39kDa	4704	603834	12
7953291	-1.1	0.466681	6.61e-05	0.000418562	-1	-1.78	0.292103	1.65e-07	1.02e-06	-1	-0.68	0.625915	0.00584182	0.0166641	0	1.08	2.11259	1.5e-05	4.77e-05	1	-0.02	0.985905	0.918208	0.963884	0	-0.7	0.617093	0.00126852	0.00880393	0	6.44621	7.5457	8.22167	7.52523	CD9	CD9 molecule	928	143030	12
7953765	-1.38	0.383155	3.44e-07	1.61e-05	-1	-2.16	0.223051	6.32e-10	2.72e-08	-1	-0.78	0.582143	0.000561702	0.00312947	0	2.41	5.30819	4.99e-12	2.18e-09	1	1.02	2.03386	6.56e-06	0.00325737	1	0.24	1.184	0.163618	0.261822	0	4.47071	5.85471	6.63526	6.87893	RIMKLB	ribosomal modification protein rimK-like family member B	57494	NA	12
7954021	-1.07	0.475424	8.99e-06	0.000110032	-1	-1.36	0.388612	6.54e-07	2.92e-06	-1	-0.29	0.817402	0.130797	0.1902	0	1.13	2.19081	7.84e-07	4.87e-06	1	0.06	1.04156	0.72637	0.861587	0	-0.23	0.851375	0.157939	0.255426	0	5.48328	6.55599	6.84687	6.61474	CREBL2	cAMP responsive element binding protein-like 2	1389	603476	12
7954029	-1.13	0.458115	1.46e-06	3.57e-05	-1	-1.6	0.330662	7.83e-09	1.24e-07	-1	-0.47	0.721788	0.0105488	0.0257214	0	1.11	2.16592	2.05e-07	1.84e-06	1	-0.01	0.992241	0.941723	0.974716	0	-0.48	0.716188	0.00270137	0.0145749	0	4.94466	6.07088	6.54123	6.05964	CDKN1B	cyclin-dependent kinase inhibitor 1B (p27, Kip1)	1027	600778, 610755	12
7954090	-1.19	0.438466	9.81e-06	0.000116933	-1	-1.66	0.316015	8.95e-08	6.45e-07	-1	-0.47	0.720728	0.0293135	0.0566523	0	1.24	2.35714	5.7e-07	3.85e-06	1	0.05	1.03352	0.796606	0.901227	0	-0.42	0.74489	0.0207616	0.0588093	0	4.2506	5.44007	5.91254	5.48764	EMP1	epithelial membrane protein 1	2012	602333	12
7954382	-1.06	0.479688	9.55e-08	7.96e-06	-1	-1.95	0.2583	4.58e-12	1.63e-09	-1	-0.89	0.538476	1.3e-06	6.29e-05	0	1.23	2.3411	1.01e-09	5e-08	1	0.17	1.123	0.180847	0.419	0	-0.73	0.604708	2.89e-06	0.000131196	0	3.62341	4.68324	5.57629	4.8506	PYROXD1	pyridine nucleotide-disulphide oxidoreductase domain 1	79912	NA	12
7954559	-1.67	0.314491	1.76e-08	3.28e-06	-1	-2	0.249687	3.9e-09	8.05e-08	-1	-0.33	0.793941	0.105166	0.158615	0	2	3.98657	1.81e-10	1.65e-08	1	0.33	1.25374	0.075942	0.271573	0	-0.01	0.995395	0.9694	0.97867	0	5.02548	6.69439	7.02728	7.02063	PPFIBP1	PTPRF interacting protein, binding protein 1 (liprin beta 1)	8496	603141	12, 12
7954613	-1.2	0.434704	6.55e-05	0.000416341	-1	-2.12	0.229351	4.06e-08	3.75e-07	-1	-0.92	0.527604	0.000977662	0.00458269	0	1.77	3.40141	3.35e-08	5.33e-07	1	0.56	1.4786	0.0156284	0.122374	0	-0.36	0.780117	0.0976145	0.179082	0	4.73911	5.941	6.86347	6.50524	CCDC91	coiled-coil domain containing 91	55297	NA	12
7954752	-1.53	0.346687	1.47e-06	3.58e-05	-1	-2.22	0.215164	5.66e-09	1.01e-07	-1	-0.69	0.62063	0.00650079	0.0180036	0	1.85	3.59662	5.07e-09	1.48e-07	1	0.32	1.2469	0.134578	0.360912	0	-0.37	0.773864	0.0685351	0.137793	0	3.86358	5.39188	6.08008	5.71023	DNM1L	dynamin 1-like	10059	603850	12
7955361	-1.53	0.3467	4.1e-06	6.72e-05	-1	-2.46	0.181761	1.97e-09	5.28e-08	-1	-0.93	0.52426	0.000880956	0.00426095	0	1.78	3.43574	1.99e-08	3.7e-07	1	0.25	1.19117	0.259348	0.507661	0	-0.68	0.624485	0.00278144	0.0148675	0	4.48597	6.01421	6.94585	6.26659	LARP4	La ribonucleoprotein domain family, member 4	113251	NA	12
7955450	-1.42	0.372979	5.9e-10	4.49e-07	-1	-1.97	0.254437	4.01e-12	1.62e-09	-1	-0.55	0.682175	0.000544368	0.00305467	0	1.46	2.74455	1.52e-11	3.7e-09	1	0.03	1.02366	0.78019	0.893012	0	-0.52	0.698314	0.00018835	0.00246865	0	4.35873	5.78156	6.33335	5.8153	LETMD1	LETM1 domain containing 1	25875	NA	12
7955464	-1.6	0.328934	1.34e-06	3.37e-05	-1	-2.57	0.168587	1.71e-09	4.83e-08	-1	-0.96	0.512526	0.000673384	0.00352865	0	1.69	3.23767	7.96e-08	9.55e-07	1	0.09	1.06498	0.678414	0.834167	0	-0.87	0.545829	0.000386741	0.00396573	0	4.96289	6.56702	7.53133	6.65785	DAZAP2	DAZ associated protein 2	9802	607431	12, 12
7955646	-1.18	0.442427	4.93e-05	0.000343681	-1	-1.79	0.288461	3.03e-07	1.61e-06	-1	-0.62	0.651998	0.01428	0.0323915	0	1.47	2.77847	3.47e-07	2.69e-06	1	0.3	1.22927	0.163289	0.397531	0	-0.32	0.801482	0.12136	0.209698	0	7.49608	8.67257	9.28963	8.97037	EIF4B	eukaryotic translation initiation factor 4B	1975	603928	12
7955719	-2.17	0.222571	0.000173692	0.00084496	-1	-3.22	0.107251	1.79e-06	6.36e-06	-1	-1.05	0.481874	0.0360418	0.0665495	0	2.28	4.86888	1.58e-05	4.98e-05	1	0.12	1.08367	0.785846	0.895583	0	-0.94	0.522192	0.0284381	0.0737326	0	3.86641	6.03407	7.08734	6.15	HIGD1A	HIG1 domain family, member 1A	25994	NA	3, 3
7955768	-1.13	0.458175	0.000779293	0.00256612	-1	-1.78	0.292162	9.03e-06	2.39e-05	-1	-0.65	0.637664	0.0344934	0.0643206	0	1.18	2.25899	0.000171243	0.000370226	1	0.05	1.03501	0.848725	0.928484	0	-0.6	0.659992	0.0243213	0.0657896	0	7.87937	9.0054	9.65453	9.05505	PFDN5	prefoldin subunit 5	5204	604899	12
7955787	-1.35	0.392223	2.84e-05	0.000235499	-1	-2.14	0.226342	7.86e-08	5.95e-07	-1	-0.79	0.577074	0.00506651	0.0150046	0	1.7	3.24616	1.53e-07	1.5e-06	1	0.35	1.27322	0.138098	0.366055	0	-0.44	0.734743	0.0531228	0.114659	0	5.12443	6.47469	7.26786	6.82317	SP1	Sp1 transcription factor	6667	189906	12, 12
7955890	-2.01	0.248043	0.000536782	0.00193521	-1	-2.83	0.140564	2.44e-05	5.6e-05	-1	-0.82	0.566694	0.112214	0.16764	0	2.84	7.16318	1.81e-06	9.08e-06	1	0.83	1.77678	0.0727971	0.266933	0	0.01	1.00689	0.981621	0.987069	0	6.85494	8.86628	9.68564	9.69554	HNRNPA1	heterogeneous nuclear ribonucleoprotein A1	3178	164017	12
7956159	-1.28	0.4124	0.000225906	0.00102464	-1	-2.08	0.237057	7.71e-07	3.3e-06	-1	-0.8	0.574824	0.0106615	0.0259498	0	1.04	2.04984	0.000409911	0.000792631	1	-0.24	0.845355	0.350165	0.595002	0	-1.04	0.48593	0.000293989	0.00339958	-1	4.05413	5.33201	6.13082	5.08964	RPL41	ribosomal protein L41	6171	NA	12
7956166	-1.47	0.361341	2.1e-07	1.23e-05	-1	-1.39	0.380491	1.26e-06	4.8e-06	-1	0.07	1.053	0.709636	0.763638	0	1.27	2.40902	4.24e-07	3.12e-06	1	-0.2	0.870476	0.270388	0.518166	0	-0.13	0.916609	0.467746	0.570512	0	4.09148	5.56005	5.48555	5.35993	FAM62A	family with sequence similarity 62 (C2 domain containing), member A	23344	NA	12
7957008	-1.23	0.427153	5.98e-06	8.45e-05	-1	-1.79	0.289944	7.41e-08	5.75e-07	-1	-0.56	0.678783	0.0139257	0.0318255	0	1.68	3.20436	7.55e-09	1.91e-07	1	0.45	1.36875	0.0225244	0.146906	0	-0.11	0.929085	0.562714	0.659133	0	5.63932	6.8665	7.42548	7.31936	CPSF6	cleavage and polyadenylation specific factor 6, 68kDa	11052	604979	12
7957177	-1.25	0.42111	0.000270364	0.00116307	-1	-1.97	0.255785	1.71e-06	6.14e-06	-1	-0.72	0.607407	0.0194174	0.0410544	0	1.11	2.16228	0.0002167	0.000454654	1	-0.14	0.91056	0.59946	0.784848	0	-0.85	0.55308	0.00194524	0.0116704	0	4.18285	5.43058	6.14985	5.29541	RAB21	RAB21, member RAS oncogene family	23011	612398	12
7958414	-1.24	0.422265	0.000560304	0.00199307	-1	-1.89	0.269513	7.36e-06	2.01e-05	-1	-0.65	0.638254	0.0448584	0.0789183	0	1.58	2.98334	7.42e-06	2.73e-05	1	0.33	1.25976	0.233739	0.479408	0	-0.31	0.804048	0.238568	0.34655	0	5.20818	6.45196	7.09975	6.78511	ISCU	iron-sulfur cluster scaffold homolog (E. coli)	23479	255125, 611911	12
7958644	-1.98	0.25296	3.44e-07	1.61e-05	-1	-2.93	0.13148	5.92e-10	2.62e-08	-1	-0.94	0.519767	0.00193799	0.0073967	0	2.25	4.76913	2.48e-09	9.25e-08	1	0.27	1.2064	0.274069	0.522108	0	-0.67	0.627046	0.00678416	0.0270057	0	5.18728	7.1703	8.11436	7.44101	ATP2A2	ATPase, Ca++ transporting, cardiac muscle, slow twitch 2	488	101900, 108740, 124200	12, 12
7958846	-1.8	0.28757	3.85e-07	1.68e-05	-1	-2.77	0.146885	6.23e-10	2.71e-08	-1	-0.97	0.510779	0.000814944	0.00402174	0	1.83	3.55633	3.12e-08	5.04e-07	1	0.03	1.02269	0.885601	0.948527	0	-0.94	0.52237	0.000227967	0.00280937	0	5.24762	7.04563	8.01486	7.07801	PTPN11	protein tyrosine phosphatase, non-receptor type 11	5781	151100, 163950, 163955, 176876, 607785	12
7960514	-3.34	0.0987921	5.9e-07	2.1e-05	-1	-3.23	0.106574	2.36e-06	7.95e-06	-1	0.11	1.07877	0.821269	0.859071	0	3.73	13.2333	1.53e-08	3.04e-07	1	0.39	1.30735	0.376121	0.618175	0	0.5	1.41032	0.239415	0.347457	0	4.18935	7.52881	7.41943	7.91545	---	---	NA	NA
7960553	-2.29	0.204643	0.000109361	0.000601923	-1	-3.22	0.107181	3.18e-06	1.01e-05	-1	-0.93	0.523748	0.0675225	0.109965	0	2.3	4.90855	3.21e-05	8.9e-05	1	0.01	1.0045	0.988232	0.994014	0	-0.93	0.526105	0.0373828	0.0887026	0	7.09472	9.38353	10.3166	9.39001	MRPL51	mitochondrial ribosomal protein L51	51258	611855	12
7960594	-1.29	0.409248	5.27e-07	1.98e-05	-1	-1.47	0.360889	9.17e-08	6.54e-07	-1	-0.18	0.881835	0.323483	0.401344	0	1.32	2.49401	2.77e-08	4.67e-07	1	0.03	1.02067	0.85666	0.933241	0	-0.15	0.900059	0.325706	0.437866	0	5.81018	7.09913	7.28055	7.12864	CHD4	chromodomain helicase DNA binding protein 4	1108	603277	12
7960730	-1.1	0.467029	0.0119241	0.0222846	-1	-1.94	0.26087	9.32e-05	0.000178085	-1	-0.84	0.558574	0.0413253	0.0739929	0	1.08	2.10722	0.00397021	0.00603024	1	-0.02	0.984132	0.947621	0.977304	0	-0.86	0.549711	0.0141114	0.0446847	0	5.38929	6.48771	7.32789	6.46463	LPCAT3	lysophosphatidylcholine acyltransferase 3	10162	611950	12
7960947	-1.34	0.394717	0.00199702	0.00528326	-1	-1.7	0.308345	0.000318852	0.000535304	-1	-0.36	0.78118	0.352677	0.431152	0	1.99	3.98296	4.6e-06	1.88e-05	1	0.65	1.57214	0.0645831	0.25019	0	0.3	1.22813	0.361429	0.47326	0	5.74141	7.08252	7.4388	7.73526	A2M	alpha-2-macroglobulin	2	103950, 104300	12
7961489	-1.12	0.461133	0.000106113	0.000590049	-1	-1.89	0.26961	2.11e-07	1.22e-06	-1	-0.77	0.584668	0.00354852	0.0115477	0	1.41	2.66603	1.04e-06	6e-06	1	0.3	1.22939	0.170798	0.406663	0	-0.48	0.718788	0.0291749	0.0750026	0	5.21893	6.33568	7.10999	6.63363	WBP11	WW domain binding protein 11	51729	NA	12
7961693	-1.31	0.402067	0.000776092	0.0025568	-1	-1.75	0.296754	2.39e-05	5.51e-05	-1	-0.44	0.738071	0.184873	0.25185	0	1.78	3.43566	1.24e-06	6.84e-06	1	0.47	1.38136	0.121265	0.341461	0	0.03	1.01955	0.916087	0.941939	0	6.13546	7.44995	7.88812	7.91604	LDHB	lactate dehydrogenase B	3945	150100	12
7961900	-1.43	0.370709	0.000787843	0.00258538	-1	-1.95	0.258949	5.22e-05	0.000107212	-1	-0.52	0.698523	0.169382	0.234038	0	2.14	4.40041	1.08e-06	6.19e-06	1	0.71	1.63127	0.0401767	0.197079	0	0.19	1.13948	0.550343	0.647975	0	5.53283	6.96446	7.48208	7.67046	ITPR2	inositol 1,4,5-triphosphate receptor, type 2	3709	600144	12
7962367	-1.45	0.366723	4.34e-05	0.000315522	-1	-2.37	0.192859	5.5e-08	4.63e-07	-1	-0.93	0.525898	0.00308916	0.0103518	0	1.59	3.00672	1.82e-06	9.11e-06	1	0.14	1.10263	0.578958	0.772102	0	-0.79	0.579873	0.00308195	0.015936	0	5.66796	7.1152	8.04235	7.25616	ZCRB1	zinc finger CCHC-type and RNA binding motif 1	85437	610750	12
7962499	-1.27	0.415329	1.14e-05	0.000129166	-1	-2.25	0.209949	4.76e-09	9.18e-08	-1	-0.98	0.5055	0.000246378	0.00174089	0	1.85	3.59717	4.82e-09	1.42e-07	1	0.58	1.49401	0.00813897	0.0896749	0	-0.41	0.755222	0.0484366	0.107032	0	4.82496	6.09263	7.07685	6.67182	SFRS2IP	splicing factor, arginine/serine-rich 2, interacting protein	9169	603668	12
7963187	-1.69	0.309915	7.88e-07	2.45e-05	-1	-2.03	0.244439	7.54e-08	5.8e-07	-1	-0.34	0.78873	0.173925	0.239081	0	1.93	3.82237	9.54e-09	2.18e-07	1	0.24	1.18461	0.276681	0.523887	0	-0.1	0.934337	0.640575	0.725083	0	5.43107	7.12112	7.46352	7.36553	LIMA1	LIM domain and actin binding 1	51474	608364	12, 12
7963244	-1.21	0.432367	0.000297942	0.00125165	-1	-1.98	0.252914	1.11e-06	4.32e-06	-1	-0.77	0.584952	0.0111366	0.0268065	0	1.58	2.99373	1.93e-06	9.5e-06	1	0.37	1.29439	0.148367	0.378571	0	-0.4	0.757156	0.106193	0.191108	0	4.02154	5.23121	6.00482	5.60348	TFCP2	transcription factor CP2	7024	189889	12
7963263	-2.03	0.245536	6.01e-05	0.000393798	-1	-2.48	0.179836	7.15e-06	1.96e-05	-1	-0.45	0.73242	0.274401	0.348898	0	2.43	5.37756	9.05e-07	5.43e-06	1	0.4	1.32039	0.279404	0.526546	0	-0.05	0.967077	0.888635	0.91979	0	2.8972	4.92319	5.37245	5.32415	---	---	NA	NA
7963427	-1.01	0.495534	7.43e-05	0.000454441	-1	-1.25	0.421842	5.89e-06	1.67e-05	-1	-0.23	0.851288	0.260823	0.334749	0	1.06	2.0893	4.06e-06	1.69e-05	1	0.05	1.03532	0.784816	0.895583	0	-0.18	0.881354	0.290127	0.400983	0	9.1784	10.1913	10.4236	10.2414	KRT5	keratin 5	3852	131760, 131800, 131900, 131960, 148040, 179850, 609352	12
7963750	-1.37	0.38663	2e-05	0.000187258	-1	-1.61	0.327427	7.05e-06	1.94e-05	-1	-0.24	0.846876	0.357572	0.435938	0	1.78	3.44301	9.19e-08	1.05e-06	1	0.41	1.33117	0.0816343	0.280788	0	0.17	1.12734	0.440889	0.547282	0	7.0241	8.39507	8.63485	8.80777	CBX5	chromobox homolog 5 (HP1 alpha homolog, Drosophila)	23468	604478	12, 12, 12
7963986	-1.05	0.482527	0.00975701	0.0188969	-1	-1.06	0.481175	0.0156438	0.0197076	-1	0	0.9972	0.991437	0.993527	0	1.13	2.18377	0.00283971	0.00444775	1	0.08	1.05373	0.821575	0.914126	0	0.07	1.05078	0.82625	0.871369	0	5.99786	7.04918	7.05323	7.12469	RAB13	RAB13, member RAS oncogene family	5872	602672	1
7964234	-1.27	0.415369	0.000362167	0.00144378	-1	-1.78	0.291358	9.24e-06	2.44e-05	-1	-0.51	0.701443	0.0957733	0.146645	0	1.13	2.18113	0.000274978	0.000560572	1	-0.14	0.905972	0.594984	0.781797	0	-0.65	0.635488	0.0152524	0.0474716	0	6.61665	7.88418	8.39578	7.74172	ATP5B	ATP synthase, H+ transporting, mitochondrial F1 complex, beta polypeptide	506	102910	12
7964466	-1.89	0.269237	2.75e-07	1.39e-05	-1	-2.41	0.187845	1.21e-08	1.67e-07	-1	-0.52	0.697695	0.0561381	0.0947716	0	1.72	3.29671	1.67e-07	1.58e-06	1	-0.17	0.887596	0.462379	0.689016	0	-0.69	0.619271	0.00470201	0.0211687	0	4.17169	6.06474	6.58408	5.89272	DCTN2	dynactin 2 (p50)	10540	607376	12
7964701	-1.45	0.366999	9.45e-06	0.000113879	-1	-1.89	0.270571	4.22e-07	2.07e-06	-1	-0.44	0.737252	0.0923086	0.142036	0	1.55	2.92645	4.64e-07	3.33e-06	1	0.1	1.07401	0.647951	0.816648	0	-0.34	0.791812	0.127504	0.217534	0	4.18433	5.63048	6.07026	5.73349	GNS	glucosamine (N-acetyl)-6-sulfatase	2799	252940, 607664	12
7965123	-1.54	0.343333	2.15e-07	1.25e-05	-1	-2.07	0.238279	8.05e-09	1.26e-07	-1	-0.53	0.694018	0.0209609	0.0436259	0	2.15	4.44106	3.26e-10	2.56e-08	1	0.61	1.52476	0.00426606	0.0651289	0	0.08	1.05821	0.666083	0.746995	0	5.12566	6.66798	7.19494	7.27657	PPP1R12A	protein phosphatase 1, regulatory (inhibitor) subunit 12A	4659	602021	12, 12, 12
7965359	-1.25	0.421878	0.018916	0.0327428	-1	-2.29	0.204495	0.000227026	0.000393782	-1	-1.04	0.484724	0.0429629	0.0763994	0	2.09	4.27215	7.11e-05	0.000174492	1	0.85	1.80233	0.0620703	0.245296	0	-0.19	0.873632	0.643119	0.727134	0	5.16025	6.40535	7.45011	7.25521	ATP2B1	ATPase, Ca++ transporting, plasma membrane 1	490	108731	12
7965515	-1.46	0.363106	1.07e-05	0.00012349	-1	-2.1	0.233997	4.77e-08	4.16e-07	-1	-0.63	0.644431	0.0181103	0.0388468	0	1.3	2.46192	3.83e-06	1.62e-05	1	-0.16	0.893937	0.476097	0.698272	0	-0.8	0.576081	0.000847418	0.00671407	0	4.43275	5.89429	6.52819	5.73253	NDUFA12	NADH dehydrogenase (ubiquinone) 1 alpha subcomplex, 12	55967	NA	12
7965541	-1.13	0.455521	0.00542815	0.0117466	-1	-2.13	0.227904	1.76e-05	4.24e-05	-1	-1	0.500315	0.0120121	0.0284146	0	1.63	3.08506	4.94e-05	0.000128026	1	0.49	1.40531	0.14438	0.373929	0	-0.51	0.703098	0.117512	0.204705	0	3.72622	4.86063	5.85972	5.35152	FGD6	FYVE, RhoGEF and PH domain containing 6	55785	NA	12
7965956	-1.13	0.455336	0.00083649	0.00271487	-1	-1.84	0.279416	6.8e-06	1.88e-05	-1	-0.7	0.613648	0.0247737	0.0498106	0	1.45	2.74111	1.25e-05	4.1e-05	1	0.32	1.24812	0.230959	0.476266	0	-0.38	0.765908	0.138915	0.231299	0	3.77528	4.91028	5.6148	5.23004	NFYB	nuclear transcription factor Y, beta	4801	189904	12
7966268	-1.55	0.341308	3.44e-06	6.08e-05	-1	-1.88	0.271621	3.99e-07	1.98e-06	-1	-0.33	0.795824	0.19876	0.26691	0	1.66	3.15356	1.56e-07	1.51e-06	1	0.11	1.07633	0.637273	0.810257	0	-0.22	0.856572	0.30243	0.414468	0	4.49365	6.04451	6.37399	6.15063	GIT2	G protein-coupled receptor kinase interacting ArfGAP 2	9815	608564	12, 12
7966368	-1.35	0.390971	0.000407382	0.00157295	-1	-2.33	0.19879	7.24e-07	3.15e-06	-1	-0.98	0.508453	0.00593445	0.016858	0	1.65	3.13645	7.07e-06	2.63e-05	1	0.29	1.22626	0.314503	0.559998	0	-0.68	0.623496	0.0201794	0.0575845	0	6.35743	7.7123	8.68812	8.00657	PPP1CC	protein phosphatase 1, catalytic subunit, gamma isoform	5501	176914	12
7966397	-1.29	0.409607	2.23e-05	0.000202775	-1	-1.46	0.363813	1.17e-05	2.99e-05	-1	-0.17	0.888202	0.484709	0.560375	0	1.44	2.71035	9.53e-07	5.65e-06	1	0.15	1.11018	0.486903	0.707149	0	-0.02	0.986061	0.9229	0.947251	0	6.44242	7.73011	7.90115	7.8809	ATXN2	ataxin 2	6311	183090, 601517	12
7966441	-1.34	0.39492	1.42e-09	7.03e-07	-1	-1.76	0.295102	4.98e-11	5.86e-09	-1	-0.42	0.747245	0.00563911	0.0162531	0	1.53	2.88179	5.17e-11	8.96e-09	1	0.19	1.13808	0.145148	0.374998	0	-0.23	0.850421	0.0651086	0.132656	0	4.59441	5.93478	6.35512	6.12137	C12orf47	chromosome 12 open reading frame 47	51275	NA	12
7966517	-1.11	0.462231	1.72e-06	3.87e-05	-1	-1.91	0.266825	3.98e-10	2.1e-08	-1	-0.79	0.577254	0.00011379	0.00104789	0	1.87	3.65987	1.5e-11	3.7e-09	1	0.76	1.69171	5.02e-05	0.00832114	0	-0.03	0.976544	0.813591	0.861022	0	4.47671	5.59003	6.38275	6.34851	C12orf51	chromosome 12 open reading frame 51	283450	NA	12
7966706	-1.08	0.472158	0.000146132	0.000746434	-1	-1.9	0.267823	1.43e-07	9.26e-07	-1	-0.82	0.567232	0.00206947	0.00775433	0	1.42	2.67381	6.79e-07	4.4e-06	1	0.34	1.26246	0.120489	0.340646	0	-0.48	0.716108	0.0248388	0.0668092	0	5.68464	6.7673	7.58529	7.10354	MED13L	mediator complex subunit 13-like	23389	608771, 608808	12
7967084	-1.49	0.356355	9.63e-07	2.79e-05	-1	-1.56	0.338435	3.97e-07	1.97e-06	-1	-0.07	0.949714	0.729376	0.78073	0	1.52	2.87149	3.06e-08	4.96e-07	1	0.03	1.02327	0.86434	0.93787	0	-0.04	0.971814	0.816726	0.864022	0	4.099	5.58761	5.66205	5.6208	POP5	processing of precursor 5, ribonuclease P/MRP subunit (S. cerevisiae)	51367	609992	12, 12
7967473	-1.14	0.454089	5.49e-05	0.000370508	-1	-2.06	0.239513	2e-08	2.36e-07	-1	-0.92	0.527459	0.000495896	0.00285899	0	1.22	2.33703	3.73e-06	1.59e-05	1	0.09	1.06122	0.67461	0.831923	0	-0.84	0.559749	0.000263488	0.00314431	0	4.94468	6.08364	7.00651	6.16936	EIF2B1	eukaryotic translation initiation factor 2B, subunit 1 alpha, 26kDa	1967	603896, 606686	12
7967881	-1.02	0.494616	0.000110023	0.00060405	-1	-1.34	0.394716	8.73e-06	2.33e-05	-1	-0.33	0.798025	0.146784	0.208511	0	1.36	2.57145	5.07e-07	3.56e-06	1	0.35	1.27188	0.0851821	0.28774	0	0.02	1.01499	0.90943	0.936591	0	5.46638	6.482	6.80749	6.82896	MPHOSPH8	M-phase phosphoprotein 8	54737	611626	13
7967976	-1.41	0.376749	0.000270298	0.00116307	-1	-2.19	0.21949	2.82e-06	9.13e-06	-1	-0.78	0.582589	0.0256158	0.0510769	0	1.33	2.50999	0.000152349	0.00033447	1	-0.08	0.945639	0.782656	0.894522	0	-0.86	0.550919	0.00558231	0.0236605	0	6.61369	8.02201	8.80146	7.94137	SAP18	Sin3A-associated protein, 18kDa	10284	602949	13
7968270	-1.48	0.358445	4.68e-05	0.000332783	-1	-2	0.249142	1.71e-06	6.14e-06	-1	-0.52	0.695062	0.0845853	0.132124	0	1.42	2.66671	1.43e-05	4.59e-05	1	-0.07	0.955869	0.802965	0.904632	0	-0.59	0.664389	0.0262028	0.0693854	0	3.32101	4.80118	5.32597	4.73607	ATP5EP2	ATP synthase, H+ transporting, mitochondrial F1 complex, epsilon subunit pseudogene 2	432369	NA	13
7968297	-1.24	0.423998	0.000365493	0.00145492	-1	-1.96	0.257837	1.3e-06	4.91e-06	-1	-0.72	0.608108	0.0193017	0.0408572	0	1.11	2.15801	0.000190172	0.000406089	1	-0.13	0.91499	0.621631	0.799219	0	-0.85	0.556413	0.00176094	0.0110022	0	6.84052	8.07839	8.796	7.95022	POMP	proteasome maturation protein	51371	NA	13
7968872	-1.25	0.42053	0.00230076	0.00591895	-1	-2.11	0.231381	1.83e-05	4.38e-05	-1	-0.86	0.550212	0.0260519	0.0517488	0	1.5	2.82527	0.000115231	0.000264675	1	0.25	1.18811	0.445821	0.675282	0	-0.61	0.653712	0.0601354	0.125447	0	4.09611	5.34583	6.20777	5.59449	DNAJC15	DnaJ (Hsp40) homolog, subfamily C, member 15	29103	NA	13
7968928	-1.26	0.41693	0.000255419	0.0011168	-1	-1.81	0.28595	5.33e-06	1.54e-05	-1	-0.54	0.685847	0.0694539	0.112608	0	1.71	3.27458	8.54e-07	5.19e-06	1	0.45	1.36527	0.0922668	0.297425	0	-0.09	0.936367	0.699355	0.772889	0	6.36719	7.62932	8.17336	8.0785	LOC100190939	hypothetical LOC100190939	100190939	NA	13
7969271	-1.01	0.494865	0.000630663	0.00218586	-1	-1.48	0.357385	2.04e-05	4.8e-05	-1	-0.47	0.722186	0.0792979	0.125435	0	1.3	2.46127	9.47e-06	3.3e-05	1	0.28	1.218	0.221233	0.465236	0	-0.19	0.879621	0.408233	0.5169	0	4.54438	5.55927	6.02883	5.84379	SUGT1	SGT1, suppressor of G2 allele of SKP1 (S. cerevisiae)	10910	604098	13
7969390	-1.57	0.336771	2.54e-08	3.91e-06	-1	-2.57	0.168779	1.23e-11	2.8e-09	-1	-1	0.501167	2.38e-05	0.000381004	0	2.16	4.46272	6.82e-12	2.57e-09	1	0.59	1.50292	0.00173733	0.042501	0	-0.41	0.753212	0.0183385	0.053785	0	3.79537	5.36553	6.36217	5.95329	PIBF1	progesterone immunomodulatory binding factor 1	10464	607532	13
7969677	-1.51	0.351521	1.54e-07	1.02e-05	-1	-2.09	0.234216	1.48e-09	4.48e-08	-1	-0.59	0.666293	0.00732148	0.0196485	0	1.73	3.324	1.96e-09	7.84e-08	1	0.22	1.16846	0.218755	0.46327	0	-0.36	0.778534	0.0450391	0.101573	0	5.77982	7.28813	7.8739	7.51274	MBNL2	muscleblind-like 2 (Drosophila)	10150	607327	13
7970347	-1.08	0.472583	3.39e-06	6.07e-05	-1	-1.51	0.352325	5.45e-08	4.61e-07	-1	-0.42	0.745531	0.0239765	0.0485256	0	1.45	2.73872	3.09e-09	1.04e-07	1	0.37	1.29427	0.0249146	0.154652	0	-0.05	0.964921	0.733085	0.799736	0	5.47267	6.55403	6.97769	6.92617	CDC16	cell division cycle 16 homolog (S. cerevisiae)	8881	603461	13
7970426	-1.68	0.312879	0.000811023	0.00264715	-1	-2.12	0.229725	0.000123397	0.000228502	-1	-0.45	0.734228	0.3082	0.385505	0	1.59	3.0014	0.000408329	0.000789881	1	-0.09	0.939076	0.81436	0.909086	0	-0.54	0.689496	0.155679	0.252583	0	2.87394	4.55027	4.99597	4.45958	---	---	NA	NA
7970602	-1.06	0.48026	6.52e-06	8.82e-05	-1	-1.52	0.348952	6.2e-08	5.01e-07	-1	-0.46	0.726589	0.016923	0.0368204	0	1.48	2.78998	5.41e-09	1.53e-07	1	0.42	1.33991	0.0149587	0.120674	0	-0.04	0.973568	0.802915	0.85318	0	4.62218	5.68029	6.14108	6.10243	PARP4	poly (ADP-ribose) polymerase family, member 4	143	607519	13
7970704	-1.06	0.480488	0.00329465	0.00788221	-1	-1.64	0.321644	8.66e-05	0.000167187	-1	-0.58	0.669412	0.0826237	0.129597	0	1.19	2.27549	0.000414797	0.000801087	1	0.13	1.09335	0.654951	0.819404	0	-0.45	0.731898	0.113243	0.199687	0	5.32843	6.38586	6.96489	6.51461	MTIF3	mitochondrial translational initiation factor 3	219402	NA	13
7970905	-1.36	0.390053	0.0017425	0.00475826	-1	-1.73	0.301112	0.000259228	0.000443933	-1	-0.37	0.771978	0.329889	0.407782	0	2.21	4.64166	7.99e-07	4.94e-06	1	0.86	1.81049	0.0174256	0.128789	0	0.48	1.39766	0.14181	0.234856	0	4.4193	5.77756	6.15093	6.63394	---	---	NA	NA
7970999	-1.44	0.369242	2.04e-05	0.000190361	-1	-2.26	0.20833	3.36e-08	3.28e-07	-1	-0.83	0.564211	0.00431724	0.0133505	0	1.52	2.87482	9.03e-07	5.42e-06	1	0.09	1.0615	0.714594	0.85687	0	-0.74	0.598911	0.00264458	0.0144035	0	3.80608	5.24344	6.06913	5.32955	SPG20	spastic paraplegia 20 (Troyer syndrome)	23111	275900, 607111	13, 13, 13
7971039	-1.15	0.450729	0.000334285	0.0013655	-1	-1.83	0.281684	2.24e-06	7.62e-06	-1	-0.68	0.624953	0.019521	0.0412217	0	1.58	2.99537	9.88e-07	5.78e-06	1	0.43	1.3501	0.0829488	0.283614	0	-0.25	0.843747	0.297553	0.409177	0	4.15187	5.30154	5.97972	5.73461	FAM48A	family with sequence similarity 48, member A	55578	NA	13
7971124	-1.42	0.374061	0.000977609	0.0030506	-1	-1.49	0.357054	0.00138182	0.00204477	-1	-0.07	0.954536	0.85968	0.890895	0	1.72	3.29584	4.62e-05	0.00012104	1	0.3	1.23284	0.375332	0.617964	0	0.23	1.17679	0.477462	0.579324	0	6.65773	8.07638	8.14351	8.37837	UFM1	ubiquitin-fold modifier 1	NA	NA
7971184	-1.05	0.481981	0.000481557	0.00178862	-1	-1.73	0.300863	1.88e-06	6.61e-06	-1	-0.68	0.624222	0.0136531	0.0313402	0	1.12	2.16717	5.36e-05	0.000136912	1	0.06	1.04453	0.78351	0.894902	0	-0.62	0.652021	0.00905011	0.032876	0	3.90809	4.96104	5.64091	5.0239	MRPS31	mitochondrial ribosomal protein S31	10240	611992	13
7971563	-1.38	0.383284	2.57e-07	1.37e-05	-1	-2.32	0.200494	7.23e-11	7.05e-09	-1	-0.93	0.523095	5.29e-05	0.000646687	0	1.56	2.94326	4.92e-09	1.44e-07	1	0.17	1.12811	0.311743	0.557192	0	-0.76	0.590107	9.6e-05	0.00155759	0	5.5795	6.96301	7.89787	7.13691	PCNP	PEST proteolytic signal containing nuclear protein	57092	NA	3
7971967	-1.4	0.378771	0.000748331	0.0024833	-1	-2.29	0.204042	4.47e-06	1.33e-05	-1	-0.89	0.538695	0.0197229	0.0415476	0	1.91	3.75014	4.28e-06	1.77e-05	1	0.51	1.42045	0.123185	0.344823	0	-0.39	0.765187	0.216286	0.32197	0	4.17769	5.57829	6.47075	6.08464	DIS3	DIS3 mitotic control homolog (S. cerevisiae)	22894	607533	13
7972190	-1.18	0.441288	0.000590289	0.00207557	-1	-1.6	0.330009	4.83e-05	0.000100494	-1	-0.42	0.747831	0.168811	0.233542	0	1.69	3.23237	2.13e-06	1.02e-05	1	0.51	1.42641	0.0636717	0.247814	0	0.09	1.06671	0.717561	0.786937	0	5.83706	7.01727	7.43649	7.52966	RBM26	RNA binding motif protein 26	64062	NA	13
7972713	-1.66	0.316996	4.48e-07	1.79e-05	-1	-1.96	0.256704	6.9e-08	5.45e-07	-1	-0.3	0.809802	0.203685	0.272296	0	1.52	2.86061	1.37e-07	1.39e-06	1	-0.14	0.906801	0.498654	0.715024	0	-0.45	0.734329	0.0335196	0.0820426	0	4.43908	6.09655	6.40091	5.95541	EFNB2	ephrin-B2	1948	600527	13
7973036	-1.29	0.409763	2.53e-05	0.000217865	-1	-2.1	0.233269	5.84e-08	4.82e-07	-1	-0.81	0.569277	0.0029549	0.0100186	0	1.89	3.71784	1.38e-08	2.82e-07	1	0.61	1.52344	0.0100351	0.0993029	0	-0.21	0.867257	0.337674	0.450356	0	5.47982	6.76696	7.57975	7.37429	PARP2	poly (ADP-ribose) polymerase 2	10038	607725	14
7973056	-1.42	0.372897	9.69e-08	7.96e-06	-1	-1.69	0.30951	8.06e-09	1.26e-07	-1	-0.27	0.830014	0.146887	0.208603	0	1.25	2.37929	6.7e-08	8.59e-07	1	-0.17	0.887232	0.294297	0.540756	0	-0.44	0.736415	0.00778275	0.0296319	0	6.44878	7.87193	8.14073	7.69932	APEX1	APEX nuclease (multifunctional DNA repair enzyme) 1	328	107748	14
7973214	-1.91	0.266521	3.9e-06	6.56e-05	-1	-2.72	0.151504	4.85e-08	4.21e-07	-1	-0.81	0.56845	0.0161445	0.0355297	0	2.2	4.61003	6.89e-08	8.75e-07	1	0.3	1.22867	0.295777	0.542402	0	-0.52	0.698439	0.06687	0.135387	0	5.42608	7.33375	8.14865	7.63085	TOX4	TOX high mobility group box family member 4	9878	NA	14
7973377	-1.34	0.395428	7.55e-08	7.37e-06	-1	-1.5	0.35319	1.79e-08	2.2e-07	-1	-0.16	0.893183	0.336565	0.414675	0	1.18	2.26031	5.46e-08	7.46e-07	1	-0.16	0.89379	0.288717	0.535727	0	-0.32	0.798318	0.0300448	0.0764261	0	4.42694	5.76546	5.92843	5.60346	BCL2L2	BCL2-like 2	599	601931	14
7973384	-1.55	0.340521	2.23e-05	0.000202775	-1	-1.11	0.462756	0.00190428	0.00275012	-1	0.44	1.35897	0.143341	0.204738	0	1.47	2.77218	1.68e-05	5.22e-05	1	-0.08	0.943985	0.753142	0.877957	0	0.36	1.28284	0.170234	0.26948	0	7.78932	9.3435	8.90099	9.26034	PABPN1	poly(A) binding protein, nuclear 1	8106	164300, 602279	14
7973867	-1.85	0.276483	0.000116032	0.000625737	-1	-1.98	0.254019	0.000109245	0.000205358	-1	-0.12	0.918752	0.75878	0.80589	0	1.36	2.56234	0.000842493	0.00149114	1	-0.5	0.708443	0.170381	0.406269	0	-0.62	0.650883	0.0789583	0.153248	0	7.12407	8.97881	9.10106	8.48154	---	---	NA	NA
7973902	-1.14	0.453214	0.00125027	0.00369771	-1	-2.12	0.230219	1.71e-06	6.14e-06	-1	-0.98	0.507969	0.00422768	0.013151	0	1.49	2.79957	1.71e-05	5.31e-05	1	0.34	1.26881	0.22036	0.464534	0	-0.63	0.644514	0.0242763	0.0657006	0	4.60537	5.7471	6.72429	6.09057	SRP54	signal recognition particle 54kDa	6729	604857	14
7973918	-1.4	0.37968	2.33e-06	4.65e-05	-1	-2.23	0.213551	3.1e-09	6.9e-08	-1	-0.83	0.562448	0.00101971	0.00472129	0	1.51	2.85266	1.29e-07	1.34e-06	1	0.12	1.0831	0.564081	0.763622	0	-0.72	0.609188	0.000993442	0.00746567	0	3.37874	4.77588	5.60609	4.89105	FAM177A1	family with sequence similarity 177, member A1	283635	NA	14, 14
7974190	-2.07	0.238772	8.34e-08	7.68e-06	-1	-2.64	0.16031	1.65e-09	4.73e-08	-1	-0.57	0.671393	0.0352438	0.065452	0	1.88	3.6778	2.91e-08	4.82e-07	1	-0.19	0.878158	0.425167	0.658224	0	-0.76	0.589589	0.00183909	0.0113193	0	5.98743	8.05373	8.6285	7.86628	DNAJC19	DnaJ (Hsp40) homolog, subfamily C, member 19	131118	608977, 610198	3
7974380	-1.21	0.43343	0.00166032	0.00459531	-1	-2.2	0.217237	3.04e-06	9.69e-06	-1	-1	0.501205	0.00664418	0.018331	0	1.34	2.52369	0.00013849	0.000309134	1	0.13	1.09384	0.665087	0.826144	0	-0.87	0.548239	0.00559061	0.0236864	0	5.07508	6.28121	7.27773	6.41061	PSMC6	proteasome (prosome, macropain) 26S subunit, ATPase, 6	5706	602708	14
7974455	-1.09	0.468397	0.0021857	0.00566965	-1	-1.93	0.261826	6.12e-06	1.72e-05	-1	-0.84	0.558984	0.0126138	0.0294807	0	1.31	2.47858	8.64e-05	0.000206281	1	0.22	1.16096	0.44482	0.674574	0	-0.62	0.648956	0.0262438	0.0694267	0	4.66913	5.76333	6.60245	5.97864	MAPK1IP1L	mitogen-activated protein kinase 1 interacting protein 1-like	93487	NA	14
7974619	-1.11	0.464626	0.0266542	0.0437342	-1	-1.61	0.326571	0.00384143	0.00529383	-1	-0.51	0.702869	0.285068	0.360449	0	1.96	3.87778	8.96e-05	0.000212977	1	0.85	1.80171	0.0503388	0.220631	0	0.34	1.26637	0.400475	0.509734	0	4.7978	5.90366	6.41233	6.75303	---	---	NA	NA
7974851	-1.12	0.459368	0.000238838	0.00106633	-1	-1.63	0.322006	4.24e-06	1.28e-05	-1	-0.51	0.700977	0.0550372	0.0933454	0	1.3	2.45889	9.55e-06	3.32e-05	1	0.18	1.12953	0.446618	0.675987	0	-0.34	0.791777	0.133666	0.225375	0	4.78634	5.90862	6.42118	6.08435	HIF1A	hypoxia inducible factor 1, alpha subunit (basic helix-loop-helix transcription factor)	3091	603348	14
7974902	-1	0.498649	0.00764232	0.0154793	-1	-1.23	0.42616	0.00218332	0.00312996	-1	-0.23	0.85463	0.505322	0.578638	0	1.86	3.62097	2.13e-06	1.02e-05	1	0.85	1.80559	0.00918145	0.0949436	0	0.63	1.54311	0.0373904	0.0887026	0	5.5228	6.52671	6.75333	7.37918	RHOJ	ras homolog gene family, member J	57381	607653	14
7974920	-1.21	0.431507	0.00352877	0.00830956	-1	-2.07	0.237528	2.67e-05	6.05e-05	-1	-0.86	0.550461	0.0284121	0.0553597	0	2.08	4.24222	1.75e-06	8.87e-06	1	0.87	1.83055	0.0138839	0.11594	0	0.01	1.00765	0.972311	0.980293	0	5.26791	6.48046	7.34175	7.35273	SYNE2	spectrin repeat containing, nuclear envelope 2	23224	608442	14, 14, 14
7975113	-1.1	0.466559	9.49e-08	7.96e-06	-1	-1.52	0.349364	1.57e-09	4.6e-08	-1	-0.42	0.74881	0.00777955	0.0205307	0	1.12	2.17534	1.18e-08	2.5e-07	1	0.02	1.01492	0.867019	0.939564	0	-0.4	0.759984	0.00394647	0.0187153	0	4.08176	5.18163	5.59896	5.203	CHURC1	churchill domain containing 1	91612	608577	14
7975368	-1.46	0.363813	0.000169103	0.000829654	-1	-2.36	0.194352	4.68e-07	2.23e-06	-1	-0.9	0.534209	0.00917046	0.0231613	0	2.17	4.51267	9.09e-08	1.04e-06	1	0.72	1.64177	0.019187	0.136484	0	-0.19	0.877047	0.488364	0.589477	0	7.79111	9.24984	10.1544	9.96509	SFRS5	splicing factor, arginine/serine-rich 5	6430	600914	14, 14
7975626	-1.2	0.434755	1.25e-06	3.26e-05	-1	-1.98	0.254314	4.32e-10	2.16e-08	-1	-0.77	0.584959	0.000250231	0.00175789	0	1.27	2.41976	2.99e-08	4.89e-07	1	0.07	1.052	0.649086	0.816648	0	-0.7	0.615378	0.000107076	0.00166351	0	4.45288	5.6546	6.42819	5.72774	C14orf43	chromosome 14 open reading frame 43	NA	NA
7975725	-1.26	0.41694	1.43e-05	0.000148996	-1	-1.75	0.297591	4.28e-07	2.09e-06	-1	-0.49	0.713749	0.0450074	0.079134	0	1.57	2.96475	1.31e-07	1.35e-06	1	0.31	1.23613	0.146215	0.375896	0	-0.18	0.882283	0.370644	0.48159	0	6.09567	7.35776	7.84427	7.66358	YLPM1	YLP motif containing 1	56252	NA	14
7975989	-1.93	0.261755	0.00031556	0.00130609	-1	-2.58	0.167794	1.59e-05	3.89e-05	-1	-0.64	0.641035	0.161594	0.22519	0	1.81	3.51435	0.000133731	0.000300538	1	-0.12	0.9199	0.764928	0.88454	0	-0.76	0.589688	0.0543436	0.116705	0	5.64399	7.5777	8.21923	7.45725	C14orf156	chromosome 14 open reading frame 156	81892	610211	14
7976598	-1.28	0.411171	0.00370477	0.00863472	-1	-2.21	0.215931	3.13e-05	6.94e-05	-1	-0.93	0.525161	0.0276768	0.0542373	0	1.93	3.80973	1.71e-05	5.31e-05	1	0.65	1.56645	0.0780644	0.275088	0	-0.28	0.82264	0.414755	0.522555	0	5.99079	7.27298	8.20214	7.92048	PAPOLA	poly(A) polymerase alpha	10914	605553	14
7977127	-1.71	0.306372	2.06e-10	2.71e-07	-1	-1.9	0.267174	5.1e-11	5.93e-09	-1	-0.2	0.872057	0.207813	0.276567	0	1.75	3.35955	1.32e-11	3.53e-09	1	0.04	1.02927	0.765197	0.88454	0	-0.16	0.897585	0.242583	0.35089	0	5.36212	7.06876	7.26627	7.11039	KLC1	kinesin light chain 1	3831	600025	14, 14
7977621	-1.97	0.256009	2.56e-07	1.37e-05	-1	-2	0.24924	4.67e-07	2.23e-06	-1	-0.04	0.973561	0.886094	0.91273	0	1.91	3.77102	4.49e-08	6.47e-07	1	-0.05	0.965413	0.832476	0.919729	0	-0.09	0.939889	0.698002	0.771784	0	5.35577	7.32151	7.36016	7.27073	NDRG2	NDRG family member 2	57447	605272	14, 14
7977674	-1.52	0.348389	5.77e-06	8.27e-05	-1	-2.36	0.194356	1.41e-08	1.85e-07	-1	-0.84	0.557871	0.00316027	0.0105288	0	1.84	3.57719	4.56e-08	6.55e-07	1	0.32	1.24625	0.175374	0.412528	0	-0.52	0.695249	0.024545	0.066231	0	5.32451	6.84574	7.68774	7.16334	SUPT16H	suppressor of Ty 16 homolog (S. cerevisiae)	11198	605012	14
7977775	-1.72	0.302814	0.00268193	0.00667491	-1	-2.42	0.187211	0.000179218	0.000319113	-1	-0.69	0.618236	0.181978	0.248464	0	1.67	3.17475	0.00113603	0.00195005	1	-0.06	0.961359	0.900281	0.956548	0	-0.75	0.594347	0.0940133	0.17415	0	6.91245	8.63594	9.32971	8.57909	DAD1	defender against cell death 1	1603	600243	14
7977803	-1.1	0.468044	3.06e-05	0.000247049	-1	-1.55	0.340567	3.77e-07	1.89e-06	-1	-0.46	0.727639	0.0361649	0.0666867	0	1.3	2.45679	2.84e-07	2.33e-06	1	0.2	1.14989	0.282961	0.530355	0	-0.26	0.836702	0.152595	0.248619	0	4.27755	5.37283	5.83154	5.57432	RBM23	RNA binding motif protein 23	55147	NA	14
7978260	-1.17	0.443429	3.09e-05	0.000248573	-1	-1.61	0.326821	9.3e-07	3.8e-06	-1	-0.44	0.737031	0.0617886	0.102335	0	1.05	2.06613	2.45e-05	7.14e-05	1	-0.13	0.916183	0.530232	0.738152	0	-0.57	0.675255	0.00714847	0.0279514	0	5.37721	6.55043	6.99063	6.42414	DHRS1	dehydrogenase/reductase (SDR family) member 1	115817	610410	14, 14
7978272	-1.03	0.48997	6.31e-05	0.000405121	-1	-1.16	0.448313	2.07e-05	4.86e-05	-1	-0.13	0.914979	0.535539	0.607133	0	1.19	2.27478	1.18e-06	6.59e-06	1	0.16	1.11458	0.401246	0.63966	0	0.03	1.01981	0.870618	0.90532	0	5.4041	6.43334	6.56153	6.58983	CIDEB	cell death-inducing DFFA-like effector b	27141	604441	14
7978542	-1.5	0.353703	3.35e-05	0.000263615	-1	-2.01	0.248631	1.39e-06	5.18e-06	-1	-0.51	0.702937	0.0899311	0.139004	0	1.54	2.89789	5.74e-06	2.24e-05	1	0.04	1.02499	0.890974	0.951655	0	-0.47	0.720503	0.0676666	0.136419	0	5.52301	7.02241	7.53094	7.05802	KIAA1143	KIAA1143	57456	NA	3
7978558	-1.65	0.319689	3.08e-08	4.28e-06	-1	-2.62	0.162982	4.99e-11	5.86e-09	-1	-0.97	0.509814	8.45e-05	0.000867291	0	1.95	3.85166	3.31e-10	2.56e-08	1	0.3	1.23133	0.105056	0.317309	0	-0.67	0.627752	0.000946702	0.00724229	0	4.24495	5.89021	6.86216	6.19043	EAPP	E2F-associated phosphoprotein	55837	609486	14
7978739	-1.29	0.409017	0.000125042	0.000663192	-1	-2.04	0.243007	1.21e-06	4.63e-06	-1	-0.75	0.594123	0.014509	0.0327952	0	1.71	3.2753	5.68e-07	3.85e-06	1	0.42	1.33966	0.100233	0.310767	0	-0.33	0.79592	0.191736	0.29457	0	4.58113	5.87089	6.62206	6.29276	TRAPPC6B	trafficking protein particle complex 6B	122553	610397	14
7979042	-2.02	0.246822	5.6e-06	8.18e-05	-1	-2.48	0.179133	3.16e-07	1.66e-06	-1	-0.46	0.725757	0.173453	0.238666	0	2.8	6.94136	2.52e-09	9.25e-08	1	0.78	1.71328	0.0159001	0.123545	0	0.31	1.24343	0.26776	0.377516	0	3.63218	5.65063	6.11307	6.42739	---	---	NA	NA
7979204	-1.48	0.357396	3.76e-06	6.4e-05	-1	-1.7	0.308021	3.34e-07	1.72e-06	-1	-0.21	0.86185	0.362105	0.440237	0	1.71	3.28143	1.52e-08	3.03e-07	1	0.23	1.17277	0.28401	0.531139	0	0.02	1.01075	0.93581	0.955578	0	3.90688	5.39129	5.60578	5.62121	FERMT2	fermitin family homolog 2 (Drosophila)	10979	607746	14, 14
7979698	-1.28	0.41215	0.0023391	0.00599079	-1	-2.16	0.223426	1.67e-05	4.05e-05	-1	-0.88	0.542097	0.0254642	0.0508602	0	1.17	2.24535	0.00183361	0.00299153	1	-0.11	0.925424	0.737016	0.868887	0	-1	0.50167	0.00459011	0.0208366	0	3.97387	5.25262	6.136	5.14081	ATP6V1D	ATPase, H+ transporting, lysosomal 34kDa, V1 subunit D	51382	609398	14
7979732	-1.54	0.342988	1.08e-05	0.000124629	-1	-2.41	0.18759	2.65e-08	2.82e-07	-1	-0.87	0.546928	0.00385993	0.0122895	0	1.57	2.97729	1.52e-06	7.96e-06	1	0.03	1.02117	0.901517	0.957211	0	-0.84	0.558509	0.00143274	0.00956123	0	4.12575	5.66952	6.5401	5.69975	VTI1B	vesicle transport through interaction with t-SNAREs homolog 1B (yeast)	10490	603207	14
7979864	-1.09	0.471218	8.72e-05	0.000510909	-1	-1.36	0.389166	1.58e-05	3.86e-05	-1	-0.28	0.825872	0.239821	0.311821	0	1.12	2.16727	2.14e-05	6.39e-05	1	0.03	1.02126	0.88254	0.94723	0	-0.25	0.843428	0.228203	0.335282	0	6.29967	7.3852	7.66121	7.41555	ERH	enhancer of rudimentary homolog (Drosophila)	2079	601191	14
7980005	-1.16	0.448691	2.69e-09	9.95e-07	-1	-1.44	0.368087	3.16e-10	1.84e-08	-1	-0.29	0.820356	0.0301471	0.0577731	0	1.28	2.42851	8.46e-11	1.15e-08	1	0.12	1.08965	0.266489	0.514119	0	-0.16	0.8939	0.145483	0.239811	0	5.17976	6.33596	6.62164	6.45983	NUMB	numb homolog (Drosophila)	8650	603728	14
7980146	-1.62	0.325813	1.58e-06	3.67e-05	-1	-2.53	0.173227	2.08e-09	5.45e-08	-1	-0.91	0.531678	0.00120575	0.00533604	0	1.39	2.6202	1.79e-06	9.01e-06	1	-0.23	0.853693	0.308644	0.554809	0	-1.14	0.45389	1.67e-05	0.00046527	-1	6.4319	8.04979	8.96116	7.82158	NPC2	Niemann-Pick disease, type C2	10577	601015, 607625	14
7980296	-1.06	0.480559	6.03e-05	0.000394631	-1	-1.49	0.355753	9.33e-07	3.81e-06	-1	-0.43	0.74029	0.0502312	0.0864144	0	1.05	2.06412	8.96e-06	3.16e-05	1	-0.01	0.991928	0.950625	0.979201	0	-0.45	0.734315	0.019419	0.0559191	0	5.78223	6.83945	7.27328	6.82775	TMED10	transmembrane emp24-like trafficking protein 10 (yeast)	10972	605406	14
7980309	-1.78	0.290256	4.9e-05	0.000342246	-1	-2.28	0.206407	2.33e-06	7.86e-06	-1	-0.49	0.711121	0.166351	0.230555	0	1.42	2.67902	8.51e-05	0.000203765	1	-0.36	0.777603	0.250864	0.497226	0	-0.85	0.55297	0.00691669	0.0273706	0	6.06676	7.85136	8.3432	7.48847	C14orf1	chromosome 14 open reading frame 1	11161	604576	14
7980547	-1.25	0.419456	3.79e-07	1.68e-05	-1	-1.97	0.254603	1.84e-09	5.06e-08	-1	-0.72	0.606982	0.000708699	0.00364406	0	1.61	3.04271	8.73e-10	4.58e-08	1	0.35	1.27628	0.0347932	0.183821	0	-0.37	0.774682	0.0306212	0.0773974	0	3.94941	5.20282	5.92309	5.55477	SEL1L	sel-1 suppressor of lin-12-like (C. elegans)	6400	602329	14
7980923	-1.46	0.363536	1.94e-05	0.000183165	-1	-2.21	0.216643	1.51e-07	9.62e-07	-1	-0.75	0.595933	0.0114422	0.0273687	0	1.82	3.52679	1.42e-07	1.42e-06	1	0.36	1.28212	0.147644	0.377873	0	-0.39	0.764055	0.109583	0.195122	0	4.68233	6.14216	6.88894	6.50069	TRIP11	thyroid hormone receptor interactor 11	9321	604505	14
7981111	-1.25	0.420318	0.00149779	0.00423496	-1	-2.08	0.237313	1.2e-05	3.05e-05	-1	-0.82	0.564603	0.0253119	0.0506737	0	1.9	3.74406	3e-06	1.34e-05	1	0.65	1.5737	0.0435473	0.205889	0	-0.17	0.888514	0.569136	0.664874	0	5.56285	6.8133	7.63799	7.46746	DICER1	dicer 1, ribonuclease type III	23405	606241	14, 14
7981439	-1.32	0.400508	4.68e-07	1.81e-05	-1	-1.82	0.283059	6.85e-09	1.15e-07	-1	-0.5	0.70675	0.0137836	0.031547	0	1.33	2.51315	5.51e-08	7.47e-07	1	0.01	1.00654	0.955333	0.981045	0	-0.49	0.711371	0.00562301	0.0237417	0	4.42125	5.74135	6.24207	5.75075	BAG5	BCL2-associated athanogene 5	9529	603885	14, 14, 14
7981481	-1.26	0.418329	0.00105683	0.00325231	-1	-1.94	0.260998	1.13e-05	2.9e-05	-1	-0.68	0.623907	0.0481385	0.0834976	0	1.19	2.2817	0.000434327	0.000833794	1	-0.07	0.954499	0.820327	0.91393	0	-0.75	0.595519	0.0124801	0.0410111	0	7.42876	8.68605	9.36665	8.61886	C14orf2	chromosome 14 open reading frame 2	9556	604573	14
7981943	-2.84	0.139512	5.29e-11	1.26e-07	-1	-3.35	0.0981239	7.51e-12	2.31e-09	-1	-0.51	0.703336	0.0455869	0.0799343	0	3.71	13.0654	1.61e-14	1.25e-10	1	0.87	1.82278	0.00048448	0.0248631	0	0.36	1.28203	0.0933547	0.173165	0	2.73341	5.57495	6.08267	6.44109	PAR5	Prader-Willi/Angelman syndrome-5	8123	600162	15
7982204	-1.75	0.297959	2.78e-07	1.39e-05	-1	-2.14	0.22713	3.07e-08	3.12e-07	-1	-0.39	0.762284	0.116449	0.172878	0	1.97	3.91485	5.34e-09	1.53e-07	1	0.22	1.16647	0.308752	0.554864	0	-0.17	0.889178	0.418911	0.526881	0	5.9924	7.73921	8.13081	7.96135	HMGN2	high-mobility group nucleosomal binding domain 2	3151	163910	1
7982531	-1.37	0.388027	0.000136676	0.000709066	-1	-1.63	0.324014	4.34e-05	9.17e-05	-1	-0.26	0.83503	0.390392	0.469045	0	1.62	3.07121	3.68e-06	1.57e-05	1	0.25	1.19171	0.346301	0.591472	0	-0.01	0.995116	0.978176	0.984662	0	7.8335	9.19927	9.45937	9.45231	ANP32A	acidic (leucine-rich) nuclear phosphoprotein 32 family, member A	8125	600832	15
7982878	-2.13	0.228902	0.000266088	0.00115238	-1	-2.76	0.147924	1.78e-05	4.28e-05	-1	-0.63	0.646231	0.201896	0.270225	0	1.43	2.69477	0.00237209	0.00377429	1	-0.7	0.616838	0.117338	0.335941	0	-1.33	0.39862	0.00330486	0.0165941	-1	6.02103	8.14822	8.7781	7.45119	CHP	calcium binding protein P22	11261	606988	15
7982904	-1	0.498429	5.67e-05	0.000378583	-1	-1.36	0.390823	2.58e-06	8.49e-06	-1	-0.35	0.784109	0.0952153	0.145934	0	1.02	2.03475	9.79e-06	3.39e-05	1	0.02	1.01418	0.910715	0.960334	0	-0.33	0.795227	0.068568	0.137804	0	5.40124	6.40578	6.75665	6.42609	RTF1	Rtf1, Paf1/RNA polymerase II complex component, homolog (S. cerevisiae)	23168	611633, 612015	15
7982957	-1	0.499569	1.1e-06	3.01e-05	-1	-1.37	0.385816	3.85e-08	3.62e-07	-1	-0.37	0.772296	0.0238573	0.0483829	0	1.32	2.48842	2.1e-09	8.25e-08	1	0.31	1.24314	0.0287074	0.165419	0	-0.06	0.960072	0.663008	0.744462	0	4.50535	5.5066	5.87937	5.82058	MGA	MAX gene associated	23269	NA	15
7983111	-1.09	0.469553	5.43e-06	8.02e-05	-1	-1.37	0.38697	2.67e-07	1.46e-06	-1	-0.28	0.824125	0.132107	0.191774	0	1.22	2.32465	1.35e-07	1.37e-06	1	0.13	1.09154	0.441888	0.672835	0	-0.15	0.899569	0.323638	0.435664	0	4.94115	6.0318	6.31086	6.15817	SNAP23	synaptosomal-associated protein, 23kDa	8773	602534	15
7983630	-1.37	0.388112	9.23e-05	0.000533525	-1	-1.37	0.387091	0.000133728	0.000245594	-1	0	0.997368	0.989294	0.992321	0	1.36	2.56411	1.51e-05	4.79e-05	1	-0.01	0.995165	0.977997	0.990135	0	-0.01	0.992546	0.964046	0.975018	0	2.85645	4.22191	4.22571	4.21491	FGF7	fibroblast growth factor 7 (keratinocyte growth factor)	2252	148180	15
7983828	-1.27	0.414441	0.000548438	0.00196557	-1	-1.5	0.354521	0.000187007	0.000331193	-1	-0.23	0.85542	0.477776	0.554001	0	1.5	2.83084	2.31e-05	6.81e-05	1	0.23	1.17321	0.417846	0.652217	0	0.01	1.00359	0.984757	0.988918	0	3.17486	4.44562	4.67091	4.67608	TEX9	testis expressed 9	374618	NA	15
7984155	-1.26	0.418203	2.72e-06	5.11e-05	-1	-1.79	0.289384	2.56e-08	2.74e-07	-1	-0.53	0.69197	0.014104	0.0321123	0	1.2	2.29043	7.86e-07	4.88e-06	1	-0.06	0.957864	0.729368	0.863035	0	-0.59	0.662813	0.00205134	0.0120555	0	4.66257	5.9203	6.45151	5.85819	SNX1	sorting nexin 1	6642	601272	15
7984641	-1.12	0.459479	0.00168448	0.00463806	-1	-2.09	0.234202	2.36e-06	7.93e-06	-1	-0.97	0.509711	0.00483076	0.0145069	0	1.53	2.88831	1.31e-05	4.26e-05	1	0.41	1.32712	0.153352	0.385798	0	-0.56	0.676446	0.0444783	0.100724	0	5.05403	6.17596	7.1482	6.58425	ARIH1	ariadne homolog, ubiquitin-conjugating enzyme E2 binding protein, 1 (Drosophila)	25820	605624	15
7985089	-1.19	0.437015	2.02e-06	4.29e-05	-1	-2.1	0.233179	1.22e-09	4e-08	-1	-0.91	0.533572	0.000103911	0.000987307	0	1.64	3.12314	1.23e-09	5.75e-08	1	0.45	1.36486	0.0126014	0.11055	0	-0.46	0.72825	0.0114877	0.0386257	0	3.8086	5.00284	5.90909	5.45159	RCN2	reticulocalbin 2, EF-hand calcium binding domain	5955	602584	15
7985695	-1.06	0.480303	3.62e-07	1.65e-05	-1	-1.5	0.354266	2.36e-09	5.86e-08	-1	-0.44	0.737589	0.00647889	0.0179748	0	1.46	2.74536	1.6e-10	1.57e-08	1	0.4	1.31861	0.00588612	0.0764457	0	-0.04	0.972589	0.750877	0.812979	0	5.56037	6.61836	7.05747	7.01737	AKAP13	A kinase (PRKA) anchor protein 13	11214	604686	15, 15
7986359	-1.22	0.427819	2.25e-05	0.000203792	-1	-1.72	0.303233	2.79e-07	1.51e-06	-1	-0.5	0.708788	0.0371694	0.0681938	0	1.65	3.13634	3.11e-08	5.03e-07	1	0.42	1.34178	0.046414	0.212132	0	-0.07	0.95104	0.706374	0.778836	0	4.55409	5.77901	6.27559	6.20317	IGF1R	insulin-like growth factor 1 receptor	3480	147370	15
7986569	-1.13	0.457626	5.42e-07	2e-05	-1	-1.21	0.432932	4.79e-07	2.27e-06	-1	-0.08	0.946037	0.623609	0.688288	0	1.33	2.51415	5.15e-09	1.5e-07	1	0.2	1.15054	0.173055	0.409275	0	0.12	1.08845	0.384637	0.494353	0	5.9258	7.05356	7.13359	7.25587	LOC440248	hect domain and RLD 2 pseudogene	440248	NA
7986769	-1.08	0.47442	0.000619551	0.0021561	-1	-2.07	0.237507	3.32e-07	1.72e-06	-1	-1	0.500626	0.00119904	0.00531281	0	1.49	2.81581	2.72e-06	1.24e-05	1	0.42	1.33588	0.0937784	0.299472	0	-0.58	0.668775	0.0194888	0.0560906	0	4.4502	5.52596	6.52416	5.94375	UBE3A	ubiquitin protein ligase E3A	7337	105830, 601623	15, 15, 15
7986977	-1.48	0.358498	9.03e-07	2.7e-05	-1	-2.4	0.18922	5.34e-10	2.45e-08	-1	-0.92	0.527811	0.000316454	0.00207882	0	1.9	3.72238	1.18e-09	5.59e-08	1	0.42	1.33447	0.0419024	0.201778	0	-0.51	0.704348	0.0115136	0.0387009	0	5.4259	6.90586	7.82777	7.32212	TJP1	tight junction protein 1 (zona occludens 1)	7082	601009	15
7987315	-1.39	0.381213	0.00831846	0.0166172	-1	-1.36	0.389997	0.0130397	0.0165973	-1	0.03	1.02304	0.945137	0.95939	0	1.25	2.38642	0.00810353	0.0116307	1	-0.14	0.909733	0.751931	0.877611	0	-0.1	0.930695	0.800331	0.851014	0	3.83456	5.22589	5.19303	5.08941	ACTC1	actin, alpha, cardiac muscle 1	70	102540, 192600, 612098	15
7987325	-1.05	0.482816	0.000148858	0.000757076	-1	-1.86	0.274701	1.16e-07	7.88e-07	-1	-0.81	0.568956	0.00166957	0.00668208	0	1.39	2.62632	5.56e-07	3.8e-06	1	0.34	1.26803	0.104147	0.316397	0	-0.47	0.721452	0.0236376	0.0644507	0	4.95451	6.00497	6.81858	6.34756	AQR	aquarius homolog (mouse)	9716	610548	15
7987449	-1.59	0.331213	1.61e-05	0.000161597	-1	-1.45	0.365033	5.91e-05	0.000119467	-1	0.14	1.10211	0.621967	0.686808	0	1.53	2.89184	2.8e-06	1.27e-05	1	-0.06	0.957815	0.808039	0.906382	0	0.08	1.05562	0.742709	0.806532	0	6.96054	8.55471	8.41444	8.49253	SRP14	signal recognition particle 14kDa (homologous Alu RNA binding protein)	6727	600708	15
7987840	-1.22	0.428938	0.000338367	0.00137959	-1	-1.63	0.32331	2.27e-05	5.27e-05	-1	-0.41	0.753745	0.166571	0.23083	0	1.37	2.59303	1.81e-05	5.56e-05	1	0.15	1.11225	0.551762	0.753914	0	-0.25	0.838353	0.306773	0.418599	0	5.18659	6.40775	6.8156	6.56123	VPS39	vacuolar protein sorting 39 homolog (S. cerevisiae)	23339	612188	15
7987869	-1.38	0.385259	7.65e-05	0.000463184	-1	-1.67	0.313193	1.62e-05	3.94e-05	-1	-0.3	0.812942	0.303458	0.380489	0	1.37	2.58041	2.17e-05	6.46e-05	1	-0.01	0.994124	0.973431	0.988479	0	-0.31	0.808166	0.221005	0.327464	0	5.48253	6.85863	7.15741	6.85013	TMEM87A	transmembrane protein 87A	25963	NA	15, 15
7987892	-1.27	0.415635	6.12e-07	2.14e-05	-1	-1.78	0.291782	3.69e-09	7.7e-08	-1	-0.51	0.702016	0.00931622	0.023438	0	1.47	2.76485	4.31e-09	1.33e-07	1	0.2	1.14917	0.224815	0.469338	0	-0.31	0.806734	0.0527691	0.114063	0	4.43742	5.70403	6.21446	5.90462	ZFP106	zinc finger protein 106 homolog (mouse)	64397	NA	15
7987926	-1.68	0.311973	5.49e-06	8.08e-05	-1	-1.51	0.351447	4.84e-05	0.000100619	-1	0.17	1.12653	0.545737	0.616393	0	2.14	4.39723	2.66e-08	4.54e-07	1	0.46	1.37182	0.0836803	0.284602	0	0.63	1.5454	0.0160538	0.0491553	0	3.86312	5.54362	5.37173	5.99971	---	---	NA	NA
7988286	-1.12	0.459668	2.56e-05	0.00021949	-1	-1.96	0.256956	1.38e-08	1.83e-07	-1	-0.84	0.559004	0.000610482	0.0032954	0	1.53	2.89087	2.91e-08	4.82e-07	1	0.41	1.32884	0.038054	0.19169	0	-0.43	0.742827	0.0255388	0.0683102	0	4.10068	5.22202	6.06109	5.63219	SPG11	spastic paraplegia 11 (autosomal recessive)	80208	604360, 610844	15
7988581	-1.47	0.361712	0.000143108	0.000735107	-1	-2.09	0.234979	3.24e-06	1.02e-05	-1	-0.62	0.649628	0.0620284	0.10267	0	1.68	3.20525	5.03e-06	2.01e-05	1	0.21	1.15938	0.457231	0.685121	0	-0.41	0.753165	0.144359	0.238402	0	4.40094	5.86803	6.49034	6.08138	SECISBP2L	SECIS binding protein 2-like	9728	NA	15
7989037	-1.4	0.377984	4.17e-08	5.24e-06	-1	-2.24	0.212132	8.92e-12	2.5e-09	-1	-0.83	0.561221	4.88e-05	0.000613981	0	1.7	3.24865	4.83e-11	8.52e-09	1	0.3	1.22794	0.059682	0.241266	0	-0.54	0.689143	0.000787516	0.00637183	0	3.58793	4.99153	5.82489	5.28777	CCPG1	cell cycle progression 1	9236	611326	15, 15
7989094	-1.01	0.496858	0.00319365	0.00767755	-1	-1.58	0.335272	8.1e-05	0.000157559	-1	-0.57	0.674785	0.0753161	0.120204	0	1.34	2.52791	5.52e-05	0.000140224	1	0.33	1.25601	0.234625	0.480189	0	-0.24	0.84754	0.369252	0.480511	0	3.65691	4.66601	5.23351	4.99486	NEDD4	neural precursor cell expressed, developmentally down-regulated 4	4734	602278	15, 15
7989146	-1.04	0.487958	0.000446324	0.00168408	-1	-1.27	0.414027	7.63e-05	0.000149101	-1	-0.24	0.84849	0.347327	0.425249	0	1.31	2.48373	4.43e-06	1.82e-05	1	0.28	1.21195	0.221166	0.465236	0	0.04	1.02833	0.849148	0.888488	0	3.89002	4.92519	5.16223	5.20253	MNS1	meiosis-specific nuclear structural 1	55329	610766	15
7989157	-1.53	0.34596	0.000135835	0.000705375	-1	-1.91	0.265385	2.77e-05	6.23e-05	-1	-0.38	0.767096	0.266097	0.340279	0	2.11	4.32046	6.91e-07	4.45e-06	1	0.58	1.49471	0.0654337	0.251232	0	0.2	1.14658	0.505934	0.605736	0	2.76541	4.29673	4.67925	4.87659	---	---	NA	NA
7989224	-1.58	0.334807	1.24e-05	0.000134715	-1	-2.55	0.170683	1.09e-08	1.56e-07	-1	-0.97	0.509794	0.00181282	0.00705695	0	2.17	4.50243	7.5e-09	1.91e-07	1	0.59	1.50744	0.0250168	0.155045	0	-0.38	0.768487	0.114264	0.200936	0	4.51323	6.09183	7.06384	6.68393	ADAM10	ADAM metallopeptidase domain 10	102	602192	15
7989243	-2.23	0.213758	1.88e-05	0.00018051	-1	-2.29	0.204911	1.85e-05	4.42e-05	-1	-0.06	0.958613	0.880026	0.907539	0	3.01	8.04313	1.4e-08	2.85e-07	1	0.78	1.71928	0.0393366	0.195422	0	0.72	1.64813	0.0427122	0.0978369	0	2.87382	5.09977	5.16075	5.88157	---	---	NA	NA
7989323	-1.54	0.343822	3.7e-06	6.33e-05	-1	-2.45	0.182488	5.17e-09	9.63e-08	-1	-0.91	0.530764	0.00135368	0.00580732	0	2.11	4.30825	2.66e-09	9.45e-08	1	0.57	1.48127	0.018034	0.131194	0	-0.35	0.786205	0.116961	0.203973	0	4.41711	5.95738	6.87123	6.52421	BNIP2	BCL2/adenovirus E1B 19kDa interacting protein 2	663	603292	15
7989335	-1.29	0.410047	0.000469701	0.00175352	-1	-2.04	0.243917	2.05e-06	7.08e-06	-1	-0.75	0.594852	0.021967	0.045195	0	1.27	2.40758	8.77e-05	0.000208931	1	-0.02	0.987221	0.946392	0.976821	0	-0.77	0.587251	0.00639011	0.0258897	0	7.14	8.42614	9.17554	8.40758	ANXA2	annexin A2	302	151740	15, 15
7989347	-1	0.499142	2.97e-05	0.000241976	-1	-1.69	0.310563	7.4e-08	5.74e-07	-1	-0.68	0.622194	0.00202992	0.00765932	0	1.41	2.65701	6.73e-08	8.6e-07	1	0.41	1.32622	0.0274536	0.161428	0	-0.28	0.825168	0.119032	0.20676	0	4.4824	5.48488	6.16945	5.89221	NARG2	NMDA receptor regulated 2	79664	610835	15
7990054	-1.84	0.278734	0.000111041	0.000607504	-1	-2.77	0.146775	1.07e-06	4.21e-06	-1	-0.93	0.526576	0.0264033	0.0523364	0	2.46	5.49382	3.64e-07	2.79e-06	1	0.61	1.53132	0.0894411	0.293803	0	-0.31	0.806354	0.359428	0.471544	0	4.65105	6.49409	7.41938	7.10886	UACA	uveal autoantigen with coiled-coil domains and ankyrin repeats	55075	612516	15, 15
7990566	-1.11	0.462026	0.000582177	0.00205349	-1	-1.85	0.276819	2.48e-06	8.26e-06	-1	-0.74	0.599141	0.0134877	0.0310257	0	1.02	2.02508	0.000305527	0.000614145	1	-0.1	0.935639	0.696266	0.844247	0	-0.84	0.56058	0.00168915	0.0107163	0	4.60815	5.7221	6.46113	5.62613	ETFA	electron-transfer-flavoprotein, alpha polypeptide	2108	231680, 608053	15
7991357	-1.68	0.313033	1.14e-06	3.07e-05	-1	-2.52	0.174647	4.68e-09	9.08e-08	-1	-0.84	0.557918	0.00300577	0.0101448	0	1.52	2.86819	7.73e-07	4.82e-06	1	-0.16	0.897838	0.493906	0.711661	0	-1	0.50092	0.000136078	0.00196755	0	4.02223	5.69785	6.53972	5.54237	AP3S2	adaptor-related protein complex 3, sigma 2 subunit	10239	602416	15
7992402	-1.47	0.361918	4.82e-05	0.000338522	-1	-1.4	0.379386	0.000186709	0.000330885	-1	0.07	1.04827	0.816977	0.855646	0	1.29	2.44427	5.08e-05	0.0001309	1	-0.18	0.884625	0.49895	0.715094	0	-0.11	0.927321	0.66584	0.746875	0	5.642	7.10827	7.04027	6.93141	NDUFB10	NADH dehydrogenase (ubiquinone) 1 beta subcomplex, 10, 22kDa	4716	603843	16
7993371	-1.73	0.301853	5.75e-06	8.27e-05	-1	-2.23	0.212487	2.71e-07	1.47e-06	-1	-0.51	0.703942	0.0924402	0.142179	0	1.64	3.1261	1.48e-06	7.78e-06	1	-0.08	0.943622	0.746615	0.87411	0	-0.59	0.664255	0.0245763	0.0662498	0	5.29802	7.0261	7.53257	6.94238	NOMO3	NODAL modulator 3	408050	609159	16
7993451	-2.02	0.245962	1.83e-05	0.000176978	-1	-2.03	0.24495	2.44e-05	5.6e-05	-1	-0.01	0.995883	0.987035	0.990634	0	1.68	3.20996	2.59e-05	7.48e-05	1	-0.34	0.789529	0.305648	0.552437	0	-0.35	0.786278	0.267542	0.377354	0	4.31517	6.33866	6.34461	5.99773	---	---	NA	NA
7993511	-1.73	0.301853	5.75e-06	8.27e-05	-1	-2.23	0.212487	2.71e-07	1.47e-06	-1	-0.51	0.703942	0.0924402	0.142179	0	1.64	3.1261	1.48e-06	7.78e-06	1	-0.08	0.943622	0.746615	0.87411	0	-0.59	0.664255	0.0245763	0.0662498	0	5.29802	7.0261	7.53257	6.94238	NOMO3	NODAL modulator 3	408050	609159	16
7993586	-2.02	0.245962	1.83e-05	0.000176978	-1	-2.03	0.24495	2.44e-05	5.6e-05	-1	-0.01	0.995883	0.987035	0.990634	0	1.68	3.20996	2.59e-05	7.48e-05	1	-0.34	0.789529	0.305648	0.552437	0	-0.35	0.786278	0.267542	0.377354	0	4.31517	6.33866	6.34461	5.99773	---	---	NA	NA
7994102	-1.12	0.460547	0.00111227	0.0033867	-1	-1.8	0.287385	9.73e-06	2.55e-05	-1	-0.68	0.62401	0.0309398	0.0589615	0	1.19	2.28817	0.000125292	0.000283859	1	0.08	1.05381	0.775085	0.889909	0	-0.6	0.657588	0.0246025	0.0662927	0	4.90888	6.02746	6.70782	6.10308	DCTN5	dynactin 5 (p25)	84516	NA	16
7994237	-1.07	0.477704	0.00221526	0.00573135	-1	-1.89	0.270379	7.88e-06	2.13e-05	-1	-0.82	0.565997	0.0131897	0.0305007	0	1.06	2.08179	0.000710509	0.00128077	1	-0.01	0.994478	0.976739	0.989595	0	-0.83	0.562872	0.00418667	0.0194908	0	4.38846	5.45427	6.27541	5.44629	LCMT1	leucine carboxyl methyltransferase 1	51451	610286	16
7994565	-1.64	0.320344	0.00116587	0.00351367	-1	-2.38	0.191575	4.1e-05	8.72e-05	-1	-0.74	0.598027	0.103322	0.156255	0	2.25	4.74168	6.91e-06	2.59e-05	1	0.6	1.51897	0.133649	0.360066	0	-0.14	0.908385	0.713012	0.783861	0	3.03099	4.6733	5.41501	5.27639	RRN3	RRN3 RNA polymerase I transcription factor homolog (S. cerevisiae)	54700	605121	16
7995252	-1.39	0.382598	7.51e-05	0.000457786	-1	-1.96	0.257031	1.06e-06	4.2e-06	-1	-0.57	0.671805	0.0514182	0.0881927	0	1.57	2.97021	1.68e-06	8.58e-06	1	0.18	1.1364	0.46708	0.693083	0	-0.39	0.763436	0.111214	0.197159	0	4.05355	5.43965	6.01354	5.62412	ZNF720	zinc finger protein 720	124411	NA	16
7995379	-1.87	0.272893	5.06e-06	7.67e-05	-1	-2.41	0.188299	3.27e-07	1.7e-06	-1	-0.54	0.690011	0.10026	0.15215	0	1.85	3.61236	1.31e-06	7.13e-06	1	-0.02	0.985788	0.94163	0.974712	0	-0.56	0.680204	0.0503226	0.11017	0	4.97866	6.85225	7.38756	6.8316	DNAJA2	DnaJ (Hsp40) homolog, subfamily A, member 2	NA	NA
7995552	-1.07	0.474768	7.94e-05	0.00047593	-1	-1.94	0.260514	3.15e-08	3.18e-07	-1	-0.87	0.548718	0.000684079	0.00355402	0	1.49	2.80981	7.52e-08	9.27e-07	1	0.42	1.33401	0.0434815	0.205756	0	-0.45	0.731993	0.0239616	0.0650745	0	4.12526	5.19996	6.06583	5.61573	CYLD	cylindromatosis (turban tumor syndrome)	1540	132700, 601606, 605018, 605041	16, 16
7995583	-1.59	0.332926	5.54e-07	2.03e-05	-1	-2.53	0.172955	6.43e-10	2.72e-08	-1	-0.94	0.519501	0.000418785	0.00253615	0	2.32	5.00707	7.69e-11	1.13e-08	1	0.74	1.66699	0.00137326	0.039296	0	-0.21	0.866001	0.29898	0.410881	0	4.48615	6.07288	7.01768	6.81012	CHD9	chromodomain helicase DNA binding protein 9	80205	NA	16
7996393	-1.17	0.445722	0.000456168	0.00171353	-1	-1.72	0.303263	6.58e-06	1.82e-05	-1	-0.56	0.680386	0.057366	0.096429	0	1.46	2.74512	4.85e-06	1.96e-05	1	0.29	1.22356	0.252578	0.499626	0	-0.26	0.832494	0.270537	0.380353	0	4.51058	5.67637	6.23194	5.96745	CBFB	core-binding factor, beta subunit	865	121360	16
7996569	-1.47	0.362053	0.00499402	0.0109772	-1	-1.71	0.306129	0.00219117	0.00314038	-1	-0.24	0.845538	0.605945	0.671831	0	1.58	2.98789	0.000791781	0.00141282	1	0.11	1.08178	0.78564	0.895583	0	-0.13	0.914682	0.746123	0.809436	0	4.68915	6.15487	6.39693	6.26828	---	---	NA	NA
7996891	-1.16	0.446941	0.000290611	0.00122841	-1	-1.7	0.307013	1.97e-06	6.85e-06	-1	-0.54	0.68692	0.0472884	0.0822843	0	1.1	2.14599	5.55e-05	0.000140743	1	-0.06	0.959131	0.798608	0.902283	0	-0.6	0.658847	0.00976379	0.0346519	0	4.77769	5.93953	6.48131	5.87933	CIRH1A	cirrhosis, autosomal recessive 1A (cirhin)	84916	604901, 607456	16
7996954	-1.53	0.345562	1.87e-06	4.1e-05	-1	-2.16	0.223528	1.91e-08	2.29e-07	-1	-0.63	0.646853	0.0144358	0.0326568	0	1.84	3.58687	1.28e-08	2.67e-07	1	0.31	1.23948	0.156518	0.389815	0	-0.32	0.801764	0.1292	0.219504	0	4.79515	6.32813	6.95662	6.63787	NFAT5	nuclear factor of activated T-cells 5, tonicity-responsive	10725	604708	16
7997272	-1.12	0.458563	0.000494137	0.00181866	-1	-2.12	0.229857	2.65e-07	1.45e-06	-1	-1	0.501254	0.0013822	0.00587435	0	1.04	2.05399	0.00029515	0.000596907	1	-0.09	0.941883	0.725536	0.861587	0	-1.08	0.472122	0.000119788	0.00179862	-1	5.40781	6.53262	7.529	6.44624	GABARAPL2	GABA(A) receptor-associated protein-like 2	11345	607452	16
7997520	-1.41	0.375377	0.000122235	0.000652418	-1	-2.24	0.212205	4.18e-07	2.06e-06	-1	-0.82	0.565311	0.0113354	0.0271548	0	1.55	2.93459	5.97e-06	2.3e-05	1	0.14	1.10158	0.605684	0.788006	0	-0.68	0.622734	0.0128413	0.0418384	0	5.99858	7.41217	8.23505	7.55174	HSBP1	heat shock factor binding protein 1	3281	604553	16
7998174	-1.24	0.424066	1.29e-05	0.000138694	-1	-1.08	0.473454	0.000163543	0.000293593	-1	0.16	1.11646	0.479986	0.556145	0	1.42	2.68197	4.04e-07	3.01e-06	1	0.19	1.13734	0.357836	0.60138	0	0.34	1.26979	0.0844519	0.161135	0	5.77737	7.01501	6.85608	7.20067	LUC7L	LUC7-like (S. cerevisiae)	55692	607782	16, 16
7999562	-1.09	0.469059	0.0137272	0.0250588	-1	-1.89	0.269979	0.000277439	0.000472013	-1	-0.8	0.575577	0.0627753	0.103671	0	1.63	3.08942	0.000173608	0.000374376	1	0.54	1.44912	0.151666	0.38301	0	-0.26	0.834078	0.460767	0.564682	0	4.91758	6.00974	6.80666	6.54491	PARN	poly(A)-specific ribonuclease (deadenylation nuclease)	5073	604212	16, 16
7999594	-2.02	0.245962	1.83e-05	0.000176978	-1	-2.03	0.24495	2.44e-05	5.6e-05	-1	-0.01	0.995883	0.987035	0.990634	0	1.68	3.20996	2.59e-05	7.48e-05	1	-0.34	0.789529	0.305648	0.552437	0	-0.35	0.786278	0.267542	0.377354	0	4.31517	6.33866	6.34461	5.99773	---	---	NA	NA
7999598	-1.39	0.382255	0.00130511	0.00382369	-1	-2.13	0.229164	1.8e-05	4.33e-05	-1	-0.74	0.599506	0.0576786	0.096819	0	1.36	2.56019	0.000378127	0.000738222	1	-0.03	0.978645	0.92559	0.96716	0	-0.77	0.586704	0.0217444	0.0607121	0	4.37695	5.76434	6.50249	5.7332	NTAN1	N-terminal asparagine amidase	123803	NA	16
7999674	-2.23	0.213757	0.000100402	0.000567183	-1	-1.75	0.296894	0.00166794	0.00243454	-1	0.47	1.38893	0.315096	0.392604	0	2.18	4.51648	2.38e-05	6.97e-05	1	-0.05	0.965428	0.903296	0.957956	0	0.42	1.34091	0.2908	0.401761	0	6.54786	8.77382	8.29984	8.72306	MYH11	myosin, heavy chain 11, smooth muscle	4629	132900, 160745	16
7999750	-2.02	0.245962	1.83e-05	0.000176978	-1	-2.03	0.24495	2.44e-05	5.6e-05	-1	-0.01	0.995883	0.987035	0.990634	0	1.68	3.20996	2.59e-05	7.48e-05	1	-0.34	0.789529	0.305648	0.552437	0	-0.35	0.786278	0.267542	0.377354	0	4.31517	6.33866	6.34461	5.99773	---	---	NA	NA
7999791	-1.73	0.301853	5.75e-06	8.27e-05	-1	-2.23	0.212487	2.71e-07	1.47e-06	-1	-0.51	0.703942	0.0924402	0.142179	0	1.64	3.1261	1.48e-06	7.78e-06	1	-0.08	0.943622	0.746615	0.87411	0	-0.59	0.664255	0.0245763	0.0662498	0	5.29802	7.0261	7.53257	6.94238	NOMO3	NODAL modulator 3	408050	609159	16
7999841	-1.4	0.37989	0.00114714	0.00346775	-1	-2.37	0.193969	4.86e-06	1.43e-05	-1	-0.97	0.510593	0.0154261	0.0343446	0	2.16	4.46367	1.12e-06	6.35e-06	1	0.76	1.6957	0.0300085	0.169368	0	-0.21	0.865815	0.515407	0.614252	0	4.76361	6.15995	7.12971	6.92184	SMG1	SMG1 homolog, phosphatidylinositol 3-kinase-related kinase (C. elegans)	23049	607032	16
8000167	-1.18	0.441341	0.00114277	0.00345743	-1	-2.09	0.234786	2.48e-06	8.24e-06	-1	-0.91	0.531982	0.00787518	0.020728	0	1.94	3.84348	4.15e-07	3.07e-06	1	0.76	1.69629	0.0116841	0.106521	0	-0.15	0.902394	0.581762	0.675454	0	6.5784	7.75843	8.66898	8.52081	SLC7A5P1	solute carrier family 7 (cationic amino acid transporter, y+ system), member 5 pseudogene 1	81893	NA	16
8000200	-1.38	0.383809	0.00161802	0.00451189	-1	-2	0.250515	6.88e-05	0.00013652	-1	-0.62	0.652708	0.120763	0.178362	0	1.93	3.80442	9.06e-06	3.19e-05	1	0.55	1.46017	0.120813	0.341193	0	-0.07	0.953064	0.833188	0.87556	0	3.29849	4.68004	5.29553	5.22617	RRN3	RRN3 RNA polymerase I transcription factor homolog (S. cerevisiae)	54700	605121	16
8000217	-1.1	0.467893	0.0124191	0.0230192	-1	-2.07	0.237914	8.58e-05	0.000165748	-1	-0.98	0.508479	0.0235997	0.0480031	0	2.07	4.21112	7.83e-06	2.85e-05	1	0.98	1.97035	0.0117595	0.106758	0	0	1.00188	0.993789	0.994966	0	7.34616	8.44191	9.41765	9.42036	BOLA2	bolA homolog 2 (E. coli)	552900	NA	16, 16
8000323	-1.73	0.301159	0.000391654	0.00152681	-1	-2.31	0.201751	2.06e-05	4.83e-05	-1	-0.58	0.669914	0.167645	0.232113	0	1.63	3.09715	0.000141982	0.000315257	1	-0.1	0.932736	0.784229	0.89529	0	-0.68	0.624853	0.0598304	0.125121	0	4.75093	6.48233	7.06029	6.38187	NDUFAB1	NADH dehydrogenase (ubiquinone) 1, alpha/beta subcomplex, 1, 8kDa	4706	603836	16
8000409	-1.75	0.297149	2.07e-07	1.21e-05	-1	-2.11	0.232207	3.04e-08	3.1e-07	-1	-0.36	0.781447	0.145619	0.207207	0	1.95	3.87614	4.46e-09	1.34e-07	1	0.2	1.15179	0.341393	0.587928	0	-0.15	0.900066	0.460916	0.564682	0	5.90222	7.65296	8.00874	7.85684	HMGN2	high-mobility group nucleosomal binding domain 2	3151	163910	1
8000482	-1.07	0.475842	0.000254758	0.0011148	-1	-1.26	0.417377	5.92e-05	0.000119698	-1	-0.19	0.877134	0.440238	0.517334	0	1.08	2.11565	3.13e-05	8.71e-05	1	0.01	1.00671	0.964438	0.984982	0	-0.18	0.883022	0.384574	0.494329	0	5.11316	6.18461	6.37374	6.19426	XPO6	exportin 6	23214	608411	16
8000638	-1.17	0.444826	0.0187412	0.0325071	-1	-2.1	0.232987	0.000343188	0.000572032	-1	-0.93	0.52377	0.0550847	0.0933973	0	2.06	4.17447	4.98e-05	0.000128818	1	0.89	1.85692	0.0395029	0.195741	0	-0.04	0.972598	0.920301	0.945382	0	7.31898	8.48766	9.42066	9.38057	LOC641298	SMG1 homolog, phosphatidylinositol 3-kinase-related kinase pseudogene	641298	NA	16
8000651	-1.05	0.484107	0.00141545	0.0040514	-1	-1.76	0.295885	7.48e-06	2.04e-05	-1	-0.71	0.611197	0.0199651	0.0419126	0	1.59	3.00592	2.19e-06	1.05e-05	1	0.54	1.45519	0.0432292	0.20511	0	-0.17	0.889405	0.490512	0.591678	0	6.67597	7.72257	8.43286	8.26377	BOLA2	bolA homolog 2 (E. coli)	552900	NA	16, 16
8000692	-1.26	0.416615	7.08e-06	9.37e-05	-1	-1.88	0.271245	4.38e-08	3.93e-07	-1	-0.62	0.651068	0.0088162	0.0225178	0	1.64	3.12614	1.77e-08	3.39e-07	1	0.38	1.3024	0.0589689	0.23939	0	-0.24	0.847949	0.21097	0.316557	0	6.99689	8.2601	8.87922	8.64127	BOLA2	bolA homolog 2 (E. coli)	552900	NA	16, 16
8000834	-1.04	0.486694	0.00490679	0.0108007	-1	-1.93	0.261853	1.62e-05	3.94e-05	-1	-0.89	0.538024	0.0125556	0.0293572	0	1.73	3.31978	5.69e-06	2.22e-05	1	0.69	1.61572	0.0273308	0.16102	0	-0.2	0.869294	0.479698	0.581328	0	6.9452	7.98412	8.87837	8.67629	BOLA2	bolA homolog 2 (E. coli)	552900	NA	16, 16
8001748	-1.33	0.39908	0.0114404	0.0215019	-1	-1.85	0.277301	0.00146927	0.0021645	-1	-0.53	0.69485	0.281504	0.356767	0	2.21	4.62083	2.79e-05	7.92e-05	1	0.88	1.84408	0.0483851	0.216318	0	0.36	1.28136	0.387523	0.497184	0	3.43991	4.76516	5.29039	5.64806	SNORA50	small nucleolar RNA, H/ACA box 50	677830	NA	16
8002301	-2.74	0.14962	2.3e-06	4.6e-05	-1	-3.09	0.117614	8.27e-07	3.48e-06	-1	-0.35	0.786081	0.425655	0.503771	0	3.11	8.62189	5.71e-08	7.64e-07	1	0.37	1.29001	0.350389	0.595106	0	0.02	1.01405	0.956703	0.970135	0	5.00675	7.74737	8.09462	8.11475	---	---	NA	NA
8002729	-1.59	0.333277	1.87e-08	3.41e-06	-1	-2.3	0.203488	3.6e-11	4.86e-09	-1	-0.71	0.610567	0.000699931	0.00361365	0	1.76	3.38656	1.61e-10	1.57e-08	1	0.17	1.12866	0.292579	0.539323	0	-0.54	0.689125	0.00189726	0.0115237	0	5.14924	6.73445	7.44623	6.90906	GLG1	golgi apparatus protein 1	2734	600753	16
8002865	-1.34	0.395499	2.11e-05	0.00019457	-1	-1.53	0.34572	6.61e-06	1.83e-05	-1	-0.19	0.874136	0.43713	0.514401	0	1.45	2.73588	1.21e-06	6.7e-06	1	0.11	1.08204	0.610159	0.791416	0	-0.08	0.945848	0.704845	0.778008	0	5.58141	6.91966	7.11373	7.03341	CFDP1	craniofacial development protein 1	10428	608108	16
8002919	-1.29	0.408715	2.97e-05	0.000241951	-1	-2.01	0.248864	8.3e-08	6.13e-07	-1	-0.72	0.608894	0.00718911	0.0194072	0	1.05	2.0696	5.82e-05	0.00014651	1	-0.24	0.845874	0.274965	0.522851	0	-0.96	0.515048	0.0001122	0.00171532	0	4.57448	5.86532	6.58105	5.62383	KARS	lysyl-tRNA synthetase	3735	601421	16
8002987	-1.51	0.351655	1.51e-08	3.06e-06	-1	-1.61	0.326627	7.91e-09	1.25e-07	-1	-0.11	0.928829	0.537495	0.608782	0	1.41	2.66454	3.53e-09	1.16e-07	1	-0.09	0.936999	0.544983	0.748487	0	-0.2	0.870312	0.177174	0.277742	0	5.34974	6.85751	6.96403	6.76363	C16orf61	chromosome 16 open reading frame 61	56942	NA	16
8002999	-1.56	0.33961	2.44e-05	0.000214383	-1	-1.7	0.308012	1.54e-05	3.78e-05	-1	-0.14	0.906957	0.630864	0.694762	0	1.36	2.55908	2.62e-05	7.54e-05	1	-0.2	0.869089	0.441087	0.672083	0	-0.34	0.788227	0.177136	0.277721	0	4.63107	6.18912	6.33001	5.98669	GCSH	glycine cleavage system protein H (aminomethyl carrier)	2653	238330, 605899	16
8003859	-1.29	0.408421	0.0108319	0.0205491	-1	-1.8	0.287824	0.0013842	0.00204773	-1	-0.5	0.704723	0.283459	0.358788	0	1.95	3.86955	7.6e-05	0.000184937	1	0.66	1.58041	0.119213	0.338053	0	0.16	1.11375	0.694685	0.768596	0	4.10839	5.40026	5.90513	6.06055	---	---	NA	NA
8004111	-1.49	0.355296	6.77e-09	1.8e-06	-1	-1.86	0.274811	5.09e-10	2.37e-08	-1	-0.37	0.77347	0.0351614	0.0653433	0	1.63	3.10453	3.36e-10	2.59e-08	1	0.14	1.10303	0.3506	0.595129	0	-0.23	0.853159	0.124696	0.213946	0	4.40645	5.89936	6.26994	6.04083	RABEP1	rabaptin, RAB GTPase binding effector protein 1	9135	603616	17
8004237	-1.62	0.325423	1.69e-06	3.84e-05	-1	-1.91	0.265336	1.73e-07	1.05e-06	-1	-0.29	0.815357	0.239181	0.311248	0	1.16	2.22802	2e-05	6.04e-05	1	-0.46	0.72505	0.0457358	0.2105	0	-0.76	0.591174	0.00122373	0.00860233	0	7.15579	8.7754	9.06989	8.31155	RNASEK	ribonuclease, RNase K	440400	NA	17
8004271	-1.87	0.272651	3.8e-07	1.68e-05	-1	-1.34	0.395591	8.42e-05	0.000163183	-1	0.54	1.4509	0.0512636	0.0879691	0	1.32	2.49497	9.63e-06	3.34e-05	1	-0.56	0.680256	0.0255681	0.156639	0	-0.02	0.986987	0.933006	0.954104	0	5.67992	7.55479	7.01784	6.99894	ACADVL	acyl-Coenzyme A dehydrogenase, very long chain	37	201475, 609575	17
8005141	-1.65	0.319701	1.3e-07	9.24e-06	-1	-1.98	0.253798	1.91e-08	2.3e-07	-1	-0.33	0.793859	0.136443	0.196736	0	1.96	3.89062	5.99e-10	3.54e-08	1	0.31	1.24384	0.112233	0.328394	0	-0.02	0.987432	0.921985	0.946845	0	4.8976	6.5428	6.87585	6.8576	TTC19	tetratricopeptide repeat domain 19	54902	NA	17
8005166	-1.15	0.450149	0.000171116	0.00083615	-1	-1.58	0.335501	7.77e-06	2.11e-05	-1	-0.42	0.745311	0.108358	0.162566	0	1.02	2.0307	0.000177699	0.000382443	1	-0.13	0.914119	0.57228	0.768123	0	-0.55	0.681303	0.0183103	0.0537461	0	9.01439	10.1659	10.59	10.0364	UBB	ubiquitin B	7314	119540, 191339	17
8006081	-2.07	0.238754	0.00558653	0.0120091	-1	-1.6	0.330599	0.0357326	0.0430833	-1	0.47	1.38469	0.488488	0.564088	0	2.86	7.25129	9.47e-05	0.000223407	1	0.79	1.73127	0.198002	0.438557	0	1.26	2.39727	0.0379983	0.0897344	0	4.99131	7.05771	6.58815	7.84955	---	---	NA	NA
8006148	-1.39	0.381999	2.29e-05	0.000205259	-1	-2.07	0.238431	2.16e-07	1.24e-06	-1	-0.68	0.624167	0.0157835	0.0349179	0	1.78	3.44215	7.68e-08	9.38e-07	1	0.39	1.3149	0.0980464	0.307443	0	-0.29	0.820716	0.213289	0.318985	0	4.46882	5.85718	6.53717	6.25213	GOSR1	golgi SNAP receptor complex member 1	9527	604026	17
8006170	-1.08	0.473967	1.15e-05	0.000129798	-1	-1.59	0.331548	3.63e-08	3.46e-07	-1	-0.52	0.699517	0.0106864	0.0259872	0	1.65	3.14057	7.37e-10	4.09e-08	1	0.57	1.48852	0.00226826	0.0489913	0	0.06	1.04125	0.709828	0.781697	0	5.48125	6.55839	7.07396	7.13228	LRRC37B2	leucine rich repeat containing 37, member B2	147172	NA	17
8006377	-1.37	0.386688	6.68e-08	6.82e-06	-1	-2.3	0.202797	1.54e-11	3.03e-09	-1	-0.93	0.524446	1.81e-05	0.000323287	0	1.89	3.71198	1.12e-11	3.2e-09	1	0.52	1.43538	0.00227495	0.0489913	0	-0.41	0.752778	0.00996957	0.0350861	0	5.43376	6.80451	7.73565	7.32594	ZNF207	zinc finger protein 207	7756	603428	17
8006812	-2.25	0.209881	8.25e-07	2.56e-05	-1	-2.54	0.17195	2.2e-07	1.25e-06	-1	-0.29	0.819272	0.386459	0.464933	0	1.66	3.15852	6.22e-06	2.38e-05	1	-0.59	0.662913	0.0527537	0.225607	0	-0.88	0.543106	0.0039828	0.0188631	0	5.18666	7.43902	7.7266	6.84591	PSMB3	proteasome (prosome, macropain) subunit, beta type, 3	5691	602176	17
8007023	-1.65	0.317963	5.25e-05	0.000359398	-1	-1.28	0.413222	0.00152833	0.00224244	-1	0.38	1.29959	0.262237	0.336237	0	1.64	3.11542	1.23e-05	4.04e-05	1	-0.01	0.990588	0.963189	0.984351	0	0.36	1.28736	0.208558	0.313886	0	4.32101	5.97408	5.59603	5.96044	MSL1	male-specific lethal 1 homolog (Drosophila)	339287	NA	17
8007441	-1.18	0.440359	1.37e-05	0.000145001	-1	-1.89	0.26927	1.62e-08	2.05e-07	-1	-0.71	0.611478	0.00246601	0.00876047	0	1.13	2.1948	3.94e-06	1.65e-05	1	-0.05	0.9665	0.79561	0.900757	0	-0.76	0.590994	0.000284209	0.00333694	0	9.58439	10.7676	11.4773	10.7185	RPL27	ribosomal protein L27	6155	607526	17
8007471	-1.63	0.324048	2.77e-06	5.18e-05	-1	-2.02	0.245845	1.51e-07	9.6e-07	-1	-0.4	0.758667	0.131077	0.190532	0	1.7	3.24296	1.17e-07	1.26e-06	1	0.07	1.05087	0.75572	0.879698	0	-0.33	0.797264	0.140646	0.233541	0	3.4194	5.04512	5.44358	5.11671	NBR1	neighbor of BRCA1 gene 1	4077	166945	17, 17, 17
8007745	-1.07	0.477941	2.61e-08	3.91e-06	-1	-1.52	0.349247	5.9e-11	6.22e-09	-1	-0.45	0.730732	0.0013259	0.00571058	0	1.16	2.23818	7.04e-10	3.94e-08	1	0.1	1.06972	0.397086	0.63681	0	-0.36	0.781675	0.00263362	0.0143725	0	6.2412	7.30629	7.75888	7.40352	HEXIM1	hexamethylene bis-acetamide inducible 1	10614	607328	17
8007850	-1.03	0.490383	0.00099626	0.0031026	-1	-1.95	0.258576	6.91e-07	3.04e-06	-1	-0.92	0.527294	0.00224047	0.0081704	0	1.75	3.37176	1.78e-07	1.66e-06	1	0.73	1.65345	0.00583439	0.0762867	0	-0.2	0.871856	0.392887	0.502709	0	5.07264	6.10066	7.02398	6.82615	LRRC37A	leucine rich repeat containing 37A	9884	NA	17
8007867	-1.02	0.491872	0.000355151	0.00142726	-1	-1.97	0.255254	1.1e-07	7.57e-07	-1	-0.95	0.518944	0.000682496	0.00354917	0	1.78	3.43633	2.18e-08	3.94e-07	1	0.76	1.69024	0.00176056	0.0428613	0	-0.19	0.877137	0.363535	0.475222	0	5.08171	6.10536	7.05171	6.86258	LRRC37A2	leucine rich repeat containing 37, member A2	474170	NA	17
8008074	-1.22	0.430562	0.000107151	0.00059425	-1	-1.01	0.495597	0.00107875	0.00162623	-1	0.2	1.15105	0.431973	0.509428	0	1.35	2.54184	4.64e-06	1.89e-05	1	0.13	1.09442	0.57154	0.7676	0	0.33	1.25973	0.135428	0.22705	0	6.01882	7.23452	7.03158	7.36469	CDK5RAP3	CDK5 regulatory subunit associated protein 3	80279	608202	17
8008113	-1.28	0.413016	1.93e-09	8.26e-07	-1	-1.78	0.290574	2.68e-11	4.19e-09	-1	-0.51	0.703541	0.000993832	0.00463859	0	1.38	2.59678	9.11e-11	1.15e-08	1	0.1	1.07251	0.399456	0.638464	0	-0.41	0.754556	0.00204641	0.012033	0	5.39734	6.67307	7.18037	6.77407	CALCOCO2	calcium binding and coiled-coil domain 2	10241	604587	17
8008646	-1.41	0.375732	2.76e-05	0.00023049	-1	-2.39	0.191344	1.92e-08	2.3e-07	-1	-0.97	0.509255	0.00124583	0.00547132	0	1.66	3.16889	3.62e-07	2.77e-06	1	0.25	1.19065	0.2968	0.543481	0	-0.72	0.606346	0.00381731	0.0182533	0	4.9815	6.39373	7.36726	6.64548	SCPEP1	serine carboxypeptidase 1	59342	NA	17
8009227	-1.33	0.398057	0.000618232	0.0021522	-1	-1.95	0.259476	1.23e-05	3.13e-05	-1	-0.62	0.651857	0.0722703	0.116294	0	1.46	2.74798	4.44e-05	0.00011703	1	0.13	1.09385	0.661919	0.824185	0	-0.49	0.713036	0.0921553	0.17154	0	6.26385	7.59281	8.21018	7.72223	PSMC5	proteasome (prosome, macropain) 26S subunit, ATPase, 5	5705	601681	17
8009255	-1.14	0.452615	1.54e-06	3.66e-05	-1	-1.53	0.345846	5.88e-08	4.84e-07	-1	-0.39	0.764106	0.0393039	0.071274	0	1.61	3.05209	8.86e-10	4.58e-08	1	0.47	1.38143	0.00697396	0.0831324	0	0.08	1.05556	0.615069	0.703497	0	5.51607	6.65971	7.04787	7.12587	CCDC45	coiled-coil domain containing 45	90799	NA	17
8009457	-1.49	0.355361	1.62e-06	3.74e-05	-1	-2.01	0.248561	5.53e-08	4.64e-07	-1	-0.52	0.699461	0.0365381	0.0672161	0	1.68	3.1961	6.58e-08	8.49e-07	1	0.18	1.13577	0.383537	0.624247	0	-0.33	0.794426	0.112328	0.198426	0	6.78302	8.27566	8.79135	8.45933	PRKAR1A	protein kinase, cAMP-dependent, regulatory, type I, alpha (tissue specific extinguisher 1)	5573	160980, 188550, 188830, 255960, 610489	17, 17
8012000	-1.47	0.360451	7.1e-05	0.000440506	-1	-2.18	0.221428	4.77e-07	2.26e-06	-1	-0.7	0.614307	0.025732	0.0512344	0	1.29	2.44802	5.25e-05	0.000134365	1	-0.18	0.882392	0.501041	0.715932	0	-0.88	0.54206	0.00171429	0.0107991	0	6.67099	8.14311	8.84608	7.9626	RNASEK	ribonuclease, RNase K	440400	NA	17
8012304	-1.86	0.276289	5.84e-08	6.39e-06	-1	-1.95	0.259075	3.82e-08	3.59e-07	-1	-0.09	0.937698	0.684938	0.742322	0	1.54	2.90078	1.24e-07	1.3e-06	1	-0.32	0.801452	0.131336	0.357495	0	-0.41	0.75152	0.0418117	0.0963632	0	5.6803	7.53605	7.62886	7.21674	TRAPPC1	trafficking protein particle complex 1	58485	610969	17
8012376	-1.4	0.379096	7.39e-06	9.62e-05	-1	-1.7	0.30724	8.49e-07	3.55e-06	-1	-0.3	0.810455	0.213556	0.283127	0	1.31	2.48157	3.11e-06	1.38e-05	1	-0.09	0.940753	0.682113	0.835505	0	-0.39	0.762437	0.0653775	0.133105	0	6.16378	7.56314	7.86634	7.47503	VAMP2	vesicle-associated membrane protein 2 (synaptobrevin 2)	6844	185881	17
8012581	-1.85	0.276554	2.16e-07	1.25e-05	-1	-1.8	0.286796	9.22e-07	3.78e-06	-1	0.05	1.03704	0.835656	0.871152	0	1.75	3.37031	6.69e-08	8.58e-07	1	-0.1	0.932073	0.651677	0.818508	0	-0.05	0.966592	0.820662	0.867149	0	5.55133	7.4057	7.35323	7.30421	STX8	syntaxin 8	9482	604203	17
8012852	-3.01	0.123951	7.03e-05	0.000436924	-1	-2.62	0.162698	0.000706601	0.00110562	-1	0.39	1.3126	0.531717	0.603616	0	3.88	14.6959	4.89e-07	3.47e-06	1	0.87	1.82157	0.12887	0.354651	0	1.26	2.39098	0.0271764	0.0711533	0	4.37578	7.38794	6.99552	8.25312	---	---	NA	NA
8012896	-1.72	0.30293	0.000111506	0.000609435	-1	-2.67	0.157229	5.16e-07	2.41e-06	-1	-0.95	0.519025	0.0153921	0.034302	0	2.33	5.02072	2.28e-07	1.99e-06	1	0.6	1.52093	0.0733766	0.267781	0	-0.34	0.789401	0.275425	0.385539	0	5.83064	7.55358	8.49971	8.15854	PMP22	peripheral myelin protein 22	5376	118220, 118300, 145900, 162500, 180800, 601097	17, 17, 17
8012961	-1.13	0.455842	1.3e-05	0.000139792	-1	-1.63	0.322819	1.55e-07	9.78e-07	-1	-0.5	0.708181	0.0219296	0.0451411	0	1.41	2.6577	7.66e-08	9.37e-07	1	0.28	1.21149	0.1372	0.36481	0	-0.22	0.857956	0.214118	0.319832	0	5.64139	6.77479	7.2726	7.05157	NCOR1	nuclear receptor co-repressor 1	9611	600849	17
8013581	-1.28	0.413158	0.000686193	0.00231935	-1	-2.19	0.219744	1.24e-06	4.75e-06	-1	-0.91	0.531865	0.00836666	0.0217067	0	1.5	2.83513	1.65e-05	5.15e-05	1	0.23	1.17136	0.426516	0.659618	0	-0.68	0.623003	0.017044	0.051254	0	4.81179	6.08703	6.9979	6.31521	IFT20	intraflagellar transport 20 homolog (Chlamydomonas)	90410	NA	17
8014037	-1.34	0.395151	0.000159471	0.000792713	-1	-2.1	0.232765	6.59e-07	2.93e-06	-1	-0.76	0.589052	0.014777	0.0333081	0	1.6	3.02807	2.23e-06	1.06e-05	1	0.26	1.19655	0.32596	0.572289	0	-0.5	0.704828	0.0504548	0.110371	0	4.59184	5.93136	6.6949	6.19024	CRLF3	cytokine receptor-like factor 3	51379	NA	17
8014140	-1.45	0.366235	0.000316175	0.00130814	-1	-1.4	0.379249	0.000696902	0.00109107	-1	0.05	1.03554	0.881452	0.908662	0	2.19	4.57208	2.1e-07	1.87e-06	1	0.74	1.67445	0.020902	0.141129	0	0.79	1.73396	0.0104572	0.0361265	0	4.24144	5.69059	5.64022	6.43429	---	---	NA	NA
8014650	-1.52	0.349885	0.00138387	0.00398607	-1	-2.34	0.197964	2.36e-05	5.44e-05	-1	-0.82	0.565799	0.0574344	0.0965127	0	2.04	4.10363	1.14e-05	3.81e-05	1	0.52	1.4358	0.166031	0.400858	0	-0.3	0.812372	0.399985	0.509229	0	5.54021	7.05526	7.8769	7.57711	TBC1D3	TBC1 domain family, member 3	84218	607741	17, 17, 17, 17_random
8014825	-1.38	0.384665	3.25e-05	0.000257359	-1	-1.89	0.26945	6.95e-07	3.05e-06	-1	-0.51	0.70048	0.0610646	0.101366	0	1.82	3.52276	4.1e-08	6.1e-07	1	0.44	1.35508	0.0701226	0.261878	0	-0.08	0.949209	0.73456	0.800786	0	4.35137	5.7297	6.24328	6.16808	FBXL20	F-box and leucine-rich repeat protein 20	84961	609086	17
8015607	-1.94	0.261288	0.000161937	0.000803144	-1	-1.89	0.270218	0.000387286	0.000636988	-1	0.05	1.03418	0.909638	0.931627	0	1.56	2.95091	0.000392919	0.000763691	1	-0.38	0.771036	0.32913	0.575084	0	-0.33	0.797388	0.374213	0.485119	0	5.76948	7.70577	7.65728	7.33064	STAT3	signal transducer and activator of transcription 3 (acute-phase response factor)	6774	102582, 147060	17, 17
8015685	-1.3	0.405868	6.33e-09	1.79e-06	-1	-1.64	0.320531	9.31e-11	8.02e-09	-1	-0.34	0.789744	0.0214419	0.0443737	0	1.64	3.10714	3.88e-12	2.05e-09	1	0.33	1.26109	0.0134997	0.114748	0	-0.01	0.995935	0.959744	0.971655	0	4.35759	5.65851	5.99905	5.99318	EZH1	enhancer of zeste homolog 1 (Drosophila)	2145	601674	17
8015796	-1.33	0.397045	0.027549	0.0449863	-1	-1.7	0.308298	0.00855679	0.011183	-1	-0.36	0.776482	0.516566	0.589291	0	1.51	2.84831	0.00502851	0.00747743	1	0.18	1.13091	0.722626	0.861117	0	-0.19	0.878129	0.69273	0.767197	0	3.85676	5.18939	5.55436	5.36687	---	---	NA	NA
8016285	-1.46	0.364725	5.72e-06	8.27e-05	-1	-1.44	0.369557	1.53e-05	3.76e-05	-1	0.02	1.01325	0.938526	0.954595	0	1.5	2.83765	7.71e-07	4.81e-06	1	0.05	1.03496	0.822626	0.914551	0	0.07	1.04867	0.746291	0.809523	0	5.28945	6.74457	6.72559	6.79415	ARL17P1	ADP-ribosylation factor-like 17 pseudogene 1	51326	NA	17, 17
8016578	-1.19	0.437656	0.00131519	0.00384806	-1	-2.07	0.237722	4.91e-06	1.44e-05	-1	-0.88	0.54317	0.0121263	0.0286291	0	1.21	2.3189	0.000317745	0.000635084	1	0.02	1.01488	0.941216	0.974653	0	-0.86	0.551253	0.00497756	0.0219571	0	5.54289	6.73502	7.61555	6.75633	SLC35B1	solute carrier family 35, member B1	10237	610790	17
8016891	-1.27	0.415816	7.66e-05	0.000463229	-1	-1.69	0.309749	3.15e-06	9.96e-06	-1	-0.42	0.744916	0.112507	0.167983	0	1.5	2.83643	1.04e-06	6e-06	1	0.24	1.17943	0.309821	0.555554	0	-0.19	0.87858	0.400662	0.509897	0	5.80042	7.0664	7.49125	7.3045	VEZF1	vascular endothelial zinc finger 1	7716	606747	17
8016898	-1.06	0.479953	5.04e-05	0.000348888	-1	-1.21	0.433322	2.95e-05	6.6e-05	-1	-0.15	0.902843	0.495354	0.569849	0	1.4	2.63809	2.08e-07	1.86e-06	1	0.34	1.26616	0.0830414	0.283753	0	0.19	1.14314	0.303998	0.415843	0	6.57071	7.62975	7.7772	7.97021	SFRS1	splicing factor, arginine/serine-rich 1	6426	600812	17
8017162	-1.17	0.443677	0.00591461	0.0125832	-1	-2.11	0.231195	2.88e-05	6.47e-05	-1	-0.94	0.521088	0.0209887	0.0436589	0	1.37	2.5796	0.000402315	0.000780289	1	0.19	1.14451	0.567903	0.765414	0	-0.75	0.596391	0.0292849	0.0751616	0	3.28996	4.46238	5.40278	4.65711	RNFT1	ring finger protein, transmembrane 1	51136	NA	17
8017599	-1.9	0.267181	7.3e-05	0.000448758	-1	-2.76	0.147784	6.06e-07	2.74e-06	-1	-0.85	0.553122	0.0347932	0.0647502	0	2.9	7.44658	1.3e-08	2.71e-07	1	0.99	1.98958	0.00809134	0.0894301	0	0.14	1.10048	0.669041	0.749235	0	4.80174	6.70586	7.56019	7.69832	PECAM1	platelet/endothelial cell adhesion molecule	5175	173445	17
8017634	-1.24	0.424329	5.01e-06	7.63e-05	-1	-1.92	0.264947	7.21e-09	1.17e-07	-1	-0.68	0.62439	0.00270375	0.00936998	0	1.78	3.43733	1.55e-09	6.59e-08	1	0.54	1.45856	0.00671021	0.0820733	0	-0.13	0.910709	0.437537	0.544356	0	7.15211	8.38886	9.06834	8.9334	DDX5	DEAD (Asp-Glu-Ala-Asp) box polypeptide 5	1655	180630	17
8017810	-1.24	0.423996	0.000152499	0.000768179	-1	-1.75	0.297892	4.2e-06	1.27e-05	-1	-0.51	0.702583	0.0716871	0.115526	0	1.12	2.17926	0.000104009	0.000242105	1	-0.11	0.923997	0.638196	0.810795	0	-0.62	0.649184	0.0127042	0.0415529	0	5.58241	6.82029	7.32955	6.70625	PSMD12	proteasome (prosome, macropain) 26S subunit, non-ATPase, 12	5718	604450	17, 17
8018600	-1.08	0.474224	1.17e-05	0.000131041	-1	-1.68	0.312184	2.47e-08	2.67e-07	-1	-0.6	0.658305	0.00402411	0.0126875	0	1.04	2.06018	2.89e-06	1.3e-05	1	-0.03	0.976986	0.843891	0.925512	0	-0.64	0.643154	0.000622677	0.00544954	0	5.48264	6.559	7.16217	6.52541	SRP68	signal recognition particle 68kDa	6730	604858	17
8019842	-1	0.498471	0.0007634	0.00252245	-1	-1.57	0.336648	8.2e-06	2.21e-05	-1	-0.57	0.675361	0.0366172	0.0673503	0	1.26	2.39186	1.39e-05	4.48e-05	1	0.25	1.19228	0.275896	0.523599	0	-0.31	0.805216	0.164427	0.262809	0	5.05386	6.05828	6.62455	6.31199	TYMS	thymidylate synthetase	7298	188350	18
8019988	-1.37	0.387747	2.35e-05	0.000209105	-1	-1.48	0.359218	6.9e-06	1.9e-05	-1	-0.11	0.926423	0.656349	0.717886	0	1.65	3.13909	6.28e-08	8.18e-07	1	0.28	1.21717	0.211491	0.454367	0	0.17	1.12762	0.398128	0.507692	0	4.63411	6.00092	6.11118	6.28446	PTPRM	protein tyrosine phosphatase, receptor type, M	5797	176888	18
8020411	-1.01	0.496582	0.00622741	0.0131362	-1	-1.98	0.252768	9.47e-06	2.49e-05	-1	-0.97	0.509016	0.00693175	0.0189522	0	1.19	2.28145	0.000401371	0.000778734	1	0.18	1.13293	0.543345	0.747552	0	-0.79	0.576679	0.00883118	0.0324063	0	4.67244	5.68234	6.65655	5.86239	SNRPD1	small nuclear ribonucleoprotein D1 polypeptide 16kDa	6632	601063	18
8020650	-1.4	0.377978	0.00165618	0.00458786	-1	-1.16	0.44773	0.00954615	0.0123798	-1	0.24	1.18454	0.531514	0.603509	0	1.6	3.04057	0.000126565	0.000286435	1	0.2	1.14927	0.567696	0.765414	0	0.45	1.36135	0.187996	0.290237	0	5.85525	7.25888	7.01455	7.45959	---	---	NA	NA
8020668	-1.04	0.48758	5.01e-05	0.000347408	-1	-1.83	0.281597	3.91e-08	3.65e-07	-1	-0.79	0.577539	0.000910783	0.00435701	0	1.27	2.41607	3.97e-07	2.97e-06	1	0.24	1.17803	0.205796	0.447786	0	-0.56	0.680357	0.00471907	0.0212137	0	5.11033	6.14661	6.93862	6.38299	IMPACT	Impact homolog (mouse)	55364	NA	18
8021183	-2.99	0.126298	9.67e-05	0.000553632	-1	-1.82	0.282902	0.0122872	0.0157034	-1	1.16	2.23995	0.0753013	0.120198	0	2.63	6.17478	0.000119763	0.000273534	1	-0.36	0.779863	0.527223	0.735555	0	0.8	1.74686	0.146795	0.241405	0	5.58288	8.56797	7.40451	8.20927	SCARNA17	small Cajal body-specific RNA 17	677769	NA	18
8021228	-1.27	0.415566	2.61e-06	4.99e-05	-1	-2.13	0.227689	1.18e-09	3.91e-08	-1	-0.87	0.5479	0.000260086	0.00180623	0	1.53	2.89568	8.74e-09	2.08e-07	1	0.27	1.20334	0.144068	0.373734	0	-0.6	0.659312	0.0017824	0.0110458	0	4.37684	5.64369	6.5117	5.91074	SMAD4	SMAD family member 4	4089	174900, 175050, 600993	18
8021966	-1.28	0.412436	2.46e-05	0.000214965	-1	-1.38	0.38527	1.9e-05	4.52e-05	-1	-0.1	0.934135	0.683175	0.74095	0	1.45	2.73436	5.7e-07	3.85e-06	1	0.17	1.12775	0.420582	0.654432	0	0.08	1.05347	0.7138	0.784255	0	4.22273	5.50049	5.59878	5.67393	ENOSF1	enolase superfamily member 1	55556	607427	18, 18, 18
8022441	-1.04	0.484713	0.0240725	0.0401367	-1	-1.66	0.316123	0.00144053	0.00212445	-1	-0.62	0.652187	0.162365	0.226033	0	1.77	3.4164	0.000114178	0.000262588	1	0.73	1.65597	0.0685394	0.258346	0	0.11	1.08	0.763281	0.82185	0	5.1271	6.1719	6.78854	6.89957	ROCK1	Rho-associated, coiled-coil containing protein kinase 1	6093	601702	18
8022572	-1	0.498606	9.4e-06	0.000113566	-1	-1.65	0.319535	1.26e-08	1.72e-07	-1	-0.64	0.640858	0.00134521	0.00578006	0	1.44	2.71971	4.1e-09	1.29e-07	1	0.44	1.35606	0.00962953	0.0977348	0	-0.2	0.869042	0.190338	0.292792	0	4.50243	5.50645	6.14838	5.94588	OSBPL1A	oxysterol binding protein-like 1A	114876	606730	18, 18
8022625	-1.02	0.494223	0.000131417	0.000687657	-1	-1.48	0.357676	2.39e-06	8.02e-06	-1	-0.47	0.723714	0.0445858	0.078557	0	1.09	2.13186	1.01e-05	3.47e-05	1	0.08	1.05362	0.700771	0.847359	0	-0.39	0.762517	0.0482507	0.106724	0	5.42557	6.44233	6.90884	6.51768	SS18	synovial sarcoma translocation, chromosome 18	6760	600192	18
8022711	-1.04	0.486116	0.00128188	0.00377281	-1	-1.37	0.387651	0.000168722	0.000302195	-1	-0.33	0.797446	0.257983	0.33161	0	1.05	2.07435	0.000378023	0.000738152	1	0.01	1.00837	0.962032	0.984076	0	-0.31	0.804124	0.206062	0.310856	0	5.04859	6.08922	6.41576	6.10125	DSC2	desmocollin 2	1824	125645, 610476	18
8023063	-1.16	0.44745	0.00159393	0.00445493	-1	-1.99	0.2521	5.42e-06	1.56e-05	-1	-0.83	0.563415	0.0154387	0.0343498	0	1.2	2.29262	0.000256638	0.000528606	1	0.04	1.02583	0.897173	0.955269	0	-0.79	0.57797	0.00701389	0.0276313	0	6.08002	7.24022	8.06795	7.27701	ATP5A1	ATP synthase, H+ transporting, mitochondrial F1 complex, alpha subunit 1, cardiac muscle	498	164360	18, 18
8023450	-1.23	0.427771	0.000180286	0.000865863	-1	-2.16	0.223365	1.03e-07	7.17e-07	-1	-0.94	0.522161	0.00186484	0.00720301	0	1.44	2.70401	2.47e-06	1.15e-05	1	0.21	1.1567	0.384366	0.625273	0	-0.73	0.603982	0.00348802	0.017136	0	4.93699	6.16208	7.09951	6.37209	TXNL1	thioredoxin-like 1	9352	603049	18
8023497	-1	0.499954	1.92e-05	0.000182477	-1	-1.5	0.353117	6.69e-08	5.34e-07	-1	-0.5	0.706299	0.0106046	0.0258516	0	1.14	2.19696	3.17e-07	2.53e-06	1	0.14	1.09838	0.410227	0.646606	0	-0.37	0.775785	0.0241619	0.0654721	0	3.91569	4.91583	5.41747	5.0512	ATP8B1	ATPase, class I, type 8B, member 1	5205	211600, 243300, 602397	18
8024238	-1.09	0.468751	0.000171913	0.000838919	-1	-1.18	0.441089	0.000189284	0.000334746	-1	-0.09	0.940987	0.72234	0.774488	0	1.2	2.29229	1.65e-05	5.15e-05	1	0.1	1.07451	0.635354	0.808778	0	0.02	1.0111	0.94036	0.959047	0	8.47914	9.57225	9.66	9.67593	CIRBP	cold inducible RNA binding protein	1153	602649	19, 19
8025498	-1.11	0.463078	0.000268028	0.0011562	-1	-1.19	0.438312	0.000131179	0.000241523	-1	-0.08	0.946518	0.750938	0.79927	0	1.19	2.27952	1.5e-05	4.77e-05	1	0.08	1.0556	0.729365	0.863035	0	0	0.999141	0.995251	0.996162	0	4.52615	5.63682	5.71612	5.71488	SNORA70 /// RPL10	small nucleolar RNA, H/ACA box 70 /// ribosomal protein L10	NA	NA
8025500	-1.39	0.380444	3.55e-05	0.000274257	-1	-1.78	0.291074	3.69e-06	1.14e-05	-1	-0.39	0.765089	0.166785	0.231092	0	1.19	2.27555	7.6e-05	0.000184937	1	-0.21	0.865721	0.397151	0.63681	0	-0.59	0.662354	0.0182544	0.0536227	0	7.57165	8.96589	9.35219	8.75787	UBL5	ubiquitin-like 5	59286	606849	19
8026007	-1.73	0.300832	2.65e-08	3.91e-06	-1	-1.76	0.294969	5.25e-08	4.48e-07	-1	-0.03	0.980511	0.890991	0.916566	0	1.69	3.2309	4.36e-09	1.34e-07	1	-0.04	0.971959	0.824242	0.915459	0	-0.07	0.953016	0.695189	0.768985	0	5.67274	7.40571	7.4341	7.36467	ZNF791	zinc finger protein 791	163049	NA	19
8027024	-1.09	0.470753	0.00102597	0.00317791	-1	-1.7	0.307918	1.04e-05	2.7e-05	-1	-0.61	0.654097	0.0408993	0.0734347	0	1	2.00204	0.000582248	0.00107364	1	-0.09	0.942467	0.738007	0.869425	0	-0.7	0.616464	0.00795646	0.0301254	0	7.54895	8.63591	9.24833	8.55042	UBA52	ubiquitin A-52 residue ribosomal protein fusion product 1	7311	191321	19
8027592	-1.59	0.333293	1.19e-05	0.000132057	-1	-2.07	0.238644	5.97e-07	2.71e-06	-1	-0.48	0.716019	0.0986316	0.15018	0	1.99	3.9763	5.18e-08	7.2e-07	1	0.41	1.32527	0.116466	0.33476	0	-0.08	0.948921	0.754063	0.815298	0	6.41847	8.00361	8.48554	8.4099	LSM14A	LSM14A, SCD6 homolog A (S. cerevisiae)	26065	610677	19
8027650	-1.2	0.436537	2.1e-05	0.0001939	-1	-1.61	0.327645	9.76e-07	3.94e-06	-1	-0.41	0.750553	0.0765263	0.121851	0	1.39	2.62015	6.23e-07	4.12e-06	1	0.19	1.14379	0.338972	0.585315	0	-0.22	0.858479	0.264825	0.37478	0	4.30009	5.49591	5.90988	5.68974	UBA2	ubiquitin-like modifier activating enzyme 2	10054	NA	19
8027685	-1.09	0.469695	0.000344233	0.00139674	-1	-1.46	0.363272	2.23e-05	5.18e-05	-1	-0.37	0.773421	0.160357	0.223807	0	1.4	2.64625	2.76e-06	1.25e-05	1	0.31	1.24293	0.180322	0.418671	0	-0.06	0.961308	0.795878	0.847762	0	4.06924	5.15944	5.53012	5.47319	ZNF181	zinc finger protein 181	339318	606741	19
8027932	-1.33	0.398843	4.09e-05	0.000302883	-1	-1.56	0.339914	6.94e-06	1.91e-05	-1	-0.23	0.85225	0.371383	0.449816	0	1.07	2.10625	7.6e-05	0.000184937	1	-0.25	0.840061	0.279714	0.526892	0	-0.48	0.715942	0.0335819	0.0821583	0	8.47592	9.80203	10.0327	9.55059	COX6B1	cytochrome c oxidase subunit Vib polypeptide 1 (ubiquitous)	1340	124089, 220110	19
8028172	-1.61	0.327387	5.3e-07	1.98e-05	-1	-1.25	0.420921	3.53e-05	7.67e-05	-1	0.36	1.2857	0.124933	0.183257	0	1.24	2.36443	2.48e-06	1.15e-05	1	-0.37	0.774084	0.0808471	0.279311	0	-0.01	0.995239	0.971747	0.979905	0	5.73504	7.34597	6.98341	6.97653	CAPNS1	calpain, small subunit 1	826	114170	19
8028186	-1.61	0.327416	4.38e-05	0.000317092	-1	-2.28	0.20637	7.86e-07	3.34e-06	-1	-0.67	0.630299	0.0452982	0.0795171	0	1.95	3.85748	4.65e-07	3.34e-06	1	0.34	1.263	0.240581	0.486861	0	-0.33	0.796068	0.231333	0.33874	0	3.81095	5.42175	6.08764	5.7586	ZNF146	zinc finger protein 146	7705	601505	19
8028248	-1.13	0.458273	2.64e-06	5.03e-05	-1	-1.35	0.393531	4.76e-07	2.26e-06	-1	-0.22	0.858726	0.231981	0.303432	0	1.41	2.65603	7.44e-09	1.9e-07	1	0.28	1.21719	0.0864268	0.289352	0	0.06	1.04523	0.679437	0.757231	0	3.15139	4.27711	4.49684	4.56066	ZNF570	zinc finger protein 570	148268	NA	19
8029129	-1.12	0.461357	0.00044323	0.00167703	-1	-1.57	0.337185	1.04e-05	2.7e-05	-1	-0.45	0.730855	0.0990346	0.15071	0	1.07	2.10147	0.000122787	0.000279215	1	-0.04	0.969525	0.851689	0.930888	0	-0.5	0.708583	0.0347031	0.0841108	0	7.48601	8.60206	9.0544	8.55741	RPS19	ribosomal protein S19	6223	105650, 603474	19
8029273	-2.01	0.248092	1.42e-05	0.000147765	-1	-1.93	0.262781	4.05e-05	8.64e-05	-1	0.08	1.05921	0.817727	0.856103	0	1.93	3.80736	3.49e-06	1.51e-05	1	-0.08	0.944576	0.798493	0.902246	0	0	1.0005	0.998107	0.99829	0	5.62857	7.63963	7.55664	7.55736	MEGF8	multiple EGF-like-domains 8	1954	604267	19
8029615	-1.01	0.497402	0.0225079	0.0378513	-1	-1.28	0.410875	0.00600571	0.00803628	-1	-0.28	0.826043	0.497612	0.572146	0	1.21	2.31521	0.00230992	0.00368555	1	0.2	1.15159	0.576001	0.770251	0	-0.07	0.951263	0.83263	0.875394	0	3.7679	4.77541	5.05112	4.97904	---	---	NA	NA
8029831	-1.23	0.427498	3.07e-07	1.47e-05	-1	-1.04	0.486384	5.61e-06	1.6e-05	-1	0.19	1.13775	0.27352	0.34798	0	1.07	2.10025	2.52e-07	2.13e-06	1	-0.16	0.897853	0.307685	0.554222	0	0.03	1.02153	0.828428	0.872642	0	6.35942	7.58543	7.39925	7.42998	CALM3	calmodulin 3 (phosphorylase kinase, delta)	808	114183	19
8029856	-1.13	0.458449	0.00154788	0.00435571	-1	-1.63	0.323276	7.34e-05	0.00014445	-1	-0.5	0.705152	0.119527	0.176848	0	1.25	2.37041	0.000208813	0.000440558	1	0.12	1.08671	0.669474	0.829144	0	-0.38	0.766296	0.166088	0.264768	0	5.42267	6.54784	7.05183	6.66781	GRLF1	glucocorticoid receptor DNA binding factor 1	2909	605277	19
8030171	-1.61	0.32726	2.64e-05	0.000223295	-1	-1.42	0.372772	0.000190053	0.000335782	-1	0.19	1.13907	0.537042	0.608421	0	1.07	2.09637	0.000501663	0.000943672	1	-0.54	0.68606	0.0538197	0.227881	0	-0.36	0.78147	0.174504	0.274325	0	7.11396	8.72545	8.53759	8.18185	FTL	ferritin, light polypeptide	2512	134790, 600886, 606159	19
8031047	-1.71	0.305045	8.53e-07	2.62e-05	-1	-2.06	0.239934	1.28e-07	8.44e-07	-1	-0.35	0.786552	0.182994	0.249663	0	1.87	3.65735	3.85e-08	5.85e-07	1	0.16	1.11566	0.491381	0.709836	0	-0.19	0.877522	0.393761	0.503415	0	5.50215	7.21506	7.56144	7.37295	MYADM	myeloid-associated differentiation marker	91663	609959	19, 19, 19, 19
8031825	-2.43	0.185759	5.76e-07	2.07e-05	-1	-2.67	0.157238	1.45e-07	9.37e-07	-1	-0.24	0.846461	0.483988	0.559661	0	2.34	5.06151	5.86e-08	7.76e-07	1	-0.09	0.940221	0.7726	0.888885	0	-0.33	0.79586	0.254717	0.363678	0	5.14321	7.57171	7.81219	7.48278	ZNF587	zinc finger protein 587	84914	NA	19
8031827	-1.15	0.451697	8.97e-08	7.84e-06	-1	-1.54	0.343699	6.5e-10	2.73e-08	-1	-0.39	0.760906	0.0111939	0.0268912	0	1.19	2.27781	2.81e-09	9.84e-08	1	0.04	1.02888	0.75179	0.877596	0	-0.35	0.782882	0.00724396	0.0282597	0	4.6521	5.79868	6.19289	5.83975	ZNF587	zinc finger protein 587	84914	NA	19
8034454	-1.17	0.443048	1.37e-06	3.43e-05	-1	-1.09	0.470711	5.07e-06	1.48e-05	-1	0.09	1.06244	0.619553	0.684489	0	1.07	2.10168	2.74e-07	2.27e-06	1	-0.1	0.931145	0.513325	0.72463	0	-0.02	0.989284	0.915214	0.941306	0	5.10457	6.27904	6.19166	6.17611	DHPS	deoxyhypusine synthase	1725	600944	19
8034837	-1.32	0.401875	9.64e-06	0.000115261	-1	-1.46	0.364578	3.72e-06	1.15e-05	-1	-0.14	0.907191	0.539035	0.610211	0	1.01	2.01863	4.07e-05	0.000108516	1	-0.3	0.811236	0.149051	0.379607	0	-0.44	0.735947	0.0297045	0.0758728	0	4.51713	5.83231	5.97283	5.5305	DNAJB1	DnaJ (Hsp40) homolog, subfamily B, member 1	3337	604572	19
8035193	-1.36	0.388473	9.25e-09	2.2e-06	-1	-1.72	0.303117	5.84e-10	2.59e-08	-1	-0.36	0.780278	0.0293842	0.0567145	0	1.2	2.29976	1.09e-08	2.36e-07	1	-0.16	0.893396	0.243413	0.489562	0	-0.52	0.697097	0.000690023	0.00585609	0	4.22362	5.58773	5.94567	5.4251	C19orf42	chromosome 19 open reading frame 42	79086	NA	19
8035779	-2.44	0.183937	2.6e-07	1.37e-05	-1	-2.89	0.135184	3.34e-08	3.27e-07	-1	-0.44	0.73495	0.190486	0.258081	0	2.8	6.94683	2.55e-09	9.3e-08	1	0.35	1.27778	0.242779	0.488643	0	-0.09	0.939103	0.748696	0.811258	0	3.91373	6.35645	6.80073	6.71008	LOC100128975	similar to Zinc finger protein 626	100128975	NA
8036324	-1.51	0.350966	7.46e-05	0.000455206	-1	-2.19	0.219442	1.15e-06	4.46e-06	-1	-0.68	0.625252	0.0388947	0.07073	0	1.75	3.37126	1.69e-06	8.62e-06	1	0.24	1.1832	0.384926	0.625669	0	-0.43	0.739795	0.11256	0.198739	0	3.11846	4.62905	5.30654	4.87174	ZNF260	zinc finger protein 260	339324	NA	19
8036557	-2.44	0.183722	0.00724565	0.014818	-1	-3.45	0.0912038	0.000640586	0.00100955	-1	-1.01	0.496424	0.227948	0.29916	0	2.26	4.79895	0.00464405	0.00695113	1	-0.18	0.881671	0.804563	0.904802	0	-1.19	0.437682	0.0992967	0.181174	0	5.3508	7.79521	8.80557	7.61352	---	---	NA	NA
8036777	-1.18	0.441779	5.28e-05	0.000360846	-1	-1.77	0.292816	2.69e-07	1.47e-06	-1	-0.59	0.662811	0.0171915	0.0372562	0	1.3	2.45987	1.99e-06	9.71e-06	1	0.12	1.08672	0.567455	0.765414	0	-0.47	0.72029	0.023617	0.0644106	0	7.97515	9.15376	9.74709	9.27374	FBL	fibrillarin	2091	134795	19
8038086	-1.52	0.348367	4.97e-06	7.59e-05	-1	-1.96	0.257152	7.52e-08	5.8e-07	-1	-0.44	0.738165	0.0834712	0.130738	0	1.38	2.59444	1.12e-06	6.35e-06	1	-0.15	0.903819	0.512082	0.723761	0	-0.58	0.667167	0.00761774	0.0291639	0	8.05096	9.57227	10.0103	9.42638	RPL18	ribosomal protein L18	6141	604179	19
8038962	-1.03	0.491152	0.00149911	0.00423759	-1	-1.44	0.367927	0.00011351	0.000212317	-1	-0.42	0.74911	0.157261	0.220669	0	1.44	2.72161	9.77e-06	3.38e-05	1	0.42	1.33673	0.10971	0.323945	0	0	1.00136	0.993717	0.994966	0	4.55855	5.58431	6.00106	6.00301	ZNF836	zinc finger protein 836	162962	NA	19
8039796	-1.3	0.404933	4.01e-06	6.66e-05	-1	-1.3	0.406721	9.08e-06	2.4e-05	-1	0.01	1.00442	0.976355	0.984006	0	1.16	2.23624	3.48e-06	1.5e-05	1	-0.14	0.905529	0.457729	0.685402	0	-0.14	0.909528	0.457822	0.561856	0	6.15853	7.46278	7.45642	7.31961	CHMP2A	chromatin modifying protein 2A	27243	610893	19, 19
8039933	-2.42	0.186913	1.27e-06	3.26e-05	-1	-2.96	0.128737	1.17e-07	7.9e-07	-1	-0.54	0.688755	0.151785	0.214363	0	2.58	5.97764	4.78e-08	6.78e-07	1	0.16	1.1173	0.625039	0.801537	0	-0.38	0.769547	0.232371	0.339851	0	5.26575	7.68531	8.22325	7.84533	PNRC2	proline-rich nuclear receptor coactivator 2	55629	611882	1
8040163	-1.6	0.329124	2.44e-10	2.71e-07	-1	-1.87	0.273906	8.65e-11	7.86e-09	-1	-0.26	0.832226	0.090147	0.139279	0	1.73	3.31647	6.6e-12	2.57e-09	1	0.13	1.09153	0.3447	0.590789	0	-0.14	0.908401	0.294552	0.406021	0	4.4123	6.01559	6.28055	6.14195	IAH1	isoamyl acetate-hydrolyzing esterase 1 homolog (S. cerevisiae)	285148	NA	2
8040430	-1.14	0.452294	0.00489599	0.0107805	-1	-1.61	0.328477	0.000422081	0.000689652	-1	-0.46	0.726245	0.215888	0.285595	0	1.16	2.22819	0.00173573	0.00284627	1	0.01	1.0078	0.972689	0.98831	0	-0.45	0.731908	0.160255	0.258142	0	4.69699	5.84166	6.30313	5.85286	VSNL1	visinin-like 1	7447	600817	2
8040618	-1.12	0.460261	0.000961216	0.0030158	-1	-2.08	0.236259	8.71e-07	3.6e-06	-1	-0.96	0.513316	0.00308081	0.0103333	0	1.27	2.40477	5.71e-05	0.000144215	1	0.15	1.10682	0.57612	0.770251	0	-0.82	0.568149	0.00312751	0.0160523	0	5.13471	6.25419	7.21627	6.40061	RAB10	RAB10, member RAS oncogene family	10890	NA	2
8040639	-1.52	0.348153	4.91e-06	7.59e-05	-1	-2.48	0.179369	2.82e-09	6.54e-08	-1	-0.96	0.515202	0.000816978	0.00402771	0	1.62	3.07502	1.66e-07	1.57e-06	1	0.1	1.07058	0.661346	0.823931	0	-0.86	0.551563	0.000434651	0.00428033	0	4.16999	5.69219	6.64898	5.79058	HADHB	hydroxyacyl-Coenzyme A dehydrogenase/3-ketoacyl-Coenzyme A thiolase/enoyl-Coenzyme A hydratase (trifunctional protein), beta subunit	3032	143450, 609015	2
8041015	-1.38	0.383148	2.27e-06	4.58e-05	-1	-2.19	0.219418	5.47e-09	9.83e-08	-1	-0.8	0.572672	0.00140197	0.005933	0	1.58	2.99058	5.42e-08	7.44e-07	1	0.2	1.14584	0.323926	0.570181	0	-0.61	0.656189	0.00414508	0.0193434	0	4.81802	6.20204	7.00626	6.39844	SLC4A1AP	solute carrier family 4 (anion exchanger), member 1, adaptor protein	22950	602655	2
8041027	-1.85	0.276847	0.00108829	0.0033285	-1	-2.16	0.224023	0.000427913	0.000698241	-1	-0.31	0.809194	0.537585	0.6088	0	1.58	2.98673	0.00140803	0.00235844	1	-0.27	0.826868	0.534346	0.741235	0	-0.58	0.669096	0.177277	0.277862	0	6.03731	7.89015	8.19559	7.61588	MRPL33	mitochondrial ribosomal protein L33	9553	610059	2
8041447	-1.03	0.488925	0.00692488	0.0143092	-1	-1.64	0.321536	0.000191382	0.000337855	-1	-0.6	0.65764	0.0914824	0.140963	0	1.32	2.49746	0.000246075	0.000508959	1	0.29	1.22107	0.354657	0.598496	0	-0.32	0.803023	0.290033	0.400922	0	5.05657	6.08889	6.69352	6.37703	CRIM1	cysteine rich transmembrane BMP regulator 1 (chordin-like)	51232	606189	2
8041781	-1.53	0.346585	4.18e-07	1.74e-05	-1	-1.21	0.432322	1.73e-05	4.18e-05	-1	0.32	1.24738	0.143493	0.204895	0	1.22	2.32503	9.69e-07	5.72e-06	1	-0.31	0.80582	0.111358	0.327153	0	0.01	1.00516	0.966778	0.976967	0	5.36689	6.89561	6.57671	6.58414	EPAS1	endothelial PAS domain protein 1	2034	603349, 611783	2
8041888	-1.26	0.416804	1.36e-05	0.000144111	-1	-2.25	0.210078	2.34e-09	5.86e-08	-1	-0.99	0.50402	0.000192726	0.0014827	0	1.91	3.77026	1.18e-09	5.59e-08	1	0.65	1.57146	0.00323906	0.0570988	0	-0.34	0.792047	0.084488	0.161176	0	4.4817	5.74426	6.73271	6.39637	MSH6	mutS homolog 6 (E. coli)	2956	276300, 600678, 604370, 608089	2
8041995	-1.52	0.349056	1.94e-05	0.000183498	-1	-1.79	0.289511	3.49e-06	1.09e-05	-1	-0.27	0.829412	0.336809	0.414835	0	1.86	3.62207	1.07e-07	1.17e-06	1	0.34	1.2643	0.181947	0.419945	0	0.07	1.04863	0.770871	0.82774	0	6.54532	8.06379	8.33363	8.40213	SPTBN1	spectrin, beta, non-erythrocytic 1	6711	182790	2, 2
8042195	-1.99	0.252211	1.74e-06	3.9e-05	-1	-1.99	0.25193	3.72e-06	1.15e-05	-1	0	0.998885	0.995834	0.996381	0	2.42	5.36286	8.05e-09	1.99e-07	1	0.44	1.35257	0.122981	0.344516	0	0.43	1.35107	0.108785	0.19427	0	3.83167	5.81897	5.82058	6.25468	AHSA2	AHA1, activator of heat shock 90kDa protein ATPase homolog 2 (yeast)	130872	NA	2
8042207	-1.42	0.373501	2.23e-05	0.000202775	-1	-1.49	0.354888	2.45e-05	5.61e-05	-1	-0.07	0.950166	0.781645	0.825124	0	1.09	2.13125	0.000140531	0.000312606	1	-0.33	0.796022	0.176265	0.413732	0	-0.4	0.756353	0.0877319	0.165276	0	5.46566	6.88647	6.96022	6.55735	COMMD1	copper metabolism (Murr1) domain containing 1	150684	607238	2
8042223	-1.13	0.45631	2.85e-06	5.31e-05	-1	-1.32	0.399865	7.17e-07	3.13e-06	-1	-0.19	0.876301	0.302795	0.379745	0	1.37	2.58397	2.21e-08	3.96e-07	1	0.24	1.17909	0.154113	0.387016	0	0.05	1.03324	0.76338	0.821876	0	5.17698	6.30889	6.4994	6.54657	EHBP1	EH domain binding protein 1	23301	609922, 611868	2, 2, 2
8042335	-1.21	0.430988	0.000154857	0.000776841	-1	-1.75	0.297008	2.97e-06	9.53e-06	-1	-0.54	0.689132	0.0539222	0.0918241	0	1.35	2.54379	8.54e-06	3.05e-05	1	0.13	1.09634	0.577925	0.77149	0	-0.4	0.755525	0.0861158	0.163369	0	5.81542	7.0297	7.56685	7.1624	VDAC2	voltage-dependent anion channel 2	7417	193245	10
8042601	-1.07	0.475749	2.49e-06	4.85e-05	-1	-1.85	0.276884	1.75e-09	4.88e-08	-1	-0.78	0.581997	0.000177556	0.00140439	0	1.93	3.80353	2.57e-11	5.3e-09	1	0.86	1.80953	1.27e-05	0.00409736	0	0.07	1.05314	0.626464	0.713098	0	5.57164	6.64336	7.42428	7.49898	ZNF638	zinc finger protein 638	27332	NA	2
8043105	-1.58	0.334065	4.85e-08	5.68e-06	-1	-2.49	0.178478	2.39e-11	4.01e-09	-1	-0.9	0.53426	0.000100688	0.000966308	0	1.81	3.50811	2.15e-10	1.88e-08	1	0.23	1.17194	0.192741	0.43129	0	-0.68	0.626118	0.000369233	0.00384095	0	4.74019	6.32199	7.22637	6.55088	KCMF1	potassium channel modulatory factor 1	56888	NA	2
8043718	-1.56	0.338156	9.43e-05	0.000542578	-1	-1.57	0.337304	0.000159736	0.000287609	-1	0	0.99748	0.991135	0.993316	0	1.12	2.16614	0.00082984	0.00147089	1	-0.45	0.732492	0.135188	0.362015	0	-0.45	0.730646	0.114932	0.201569	0	6.25887	7.82311	7.82675	7.374	COX5B	cytochrome c oxidase subunit Vb	1329	123866	2
8043848	-1.45	0.366405	0.00366595	0.00856895	-1	-1.96	0.257877	0.000421639	0.000689136	-1	-0.51	0.703804	0.262762	0.336713	0	1.59	3.00524	0.000492947	0.000929196	1	0.14	1.10113	0.726216	0.861587	0	-0.37	0.774983	0.338295	0.450799	0	4.44081	5.8893	6.39605	6.02829	MRPL30	mitochondrial ribosomal protein L30	51263	611838	2
8043861	-1.59	0.33229	4.88e-08	5.68e-06	-1	-2.51	0.175979	1.1e-10	9.04e-09	-1	-0.92	0.529595	0.000157076	0.0012939	0	1.91	3.75806	5.84e-10	3.51e-08	1	0.32	1.24876	0.0850532	0.287393	0	-0.6	0.661338	0.00268754	0.0145289	0	5.82672	7.4162	8.33324	7.7367	EIF5B	eukaryotic translation initiation factor 5B	9669	606086	2
8044236	-1.1	0.465861	0.00269011	0.00669069	-1	-1.64	0.3202	9.2e-05	0.000176258	-1	-0.54	0.68733	0.107403	0.1614	0	1.65	3.12972	9e-06	3.18e-05	1	0.54	1.45801	0.0717235	0.265137	0	0	1.00214	0.991175	0.993265	0	5.17525	6.27728	6.8182	6.82128	GCC2	GRIP and coiled-coil domain containing 2	9648	NA	2
8044613	-1.19	0.439108	0.00042036	0.00161283	-1	-2.03	0.244109	1.28e-06	4.86e-06	-1	-0.85	0.555919	0.00731564	0.0196383	0	1.72	3.29832	8.39e-07	5.12e-06	1	0.53	1.44832	0.0466168	0.212675	0	-0.31	0.805149	0.217757	0.323718	0	5.81045	6.99781	7.84486	7.53219	CBWD2	COBW domain containing 2	150472	611079	2
8044965	-1.13	0.458045	0.00228133	0.00588003	-1	-1.99	0.251767	6.4e-06	1.78e-05	-1	-0.86	0.549656	0.012963	0.0301359	0	1.23	2.33936	0.000229383	0.000478327	1	0.1	1.07153	0.729986	0.863393	0	-0.76	0.588975	0.00966683	0.0344417	0	4.94977	6.0762	6.9396	6.17588	TSN	translin	7247	600575	2
8045860	-1.2	0.434728	2.24e-06	4.52e-05	-1	-1.59	0.332834	5.85e-08	4.82e-07	-1	-0.39	0.765615	0.0509733	0.0875258	0	1.79	3.46112	3.54e-10	2.7e-08	1	0.59	1.50465	0.00195458	0.0446978	0	0.2	1.15198	0.213444	0.319117	0	5.12189	6.3237	6.70901	6.91313	PKP4	plakophilin 4	8502	604276	2
8046099	-1.29	0.409761	0.000300352	0.00125984	-1	-1.27	0.413798	0.000248249	0.000427004	-1	0.01	1.00985	0.960797	0.971102	0	1.66	3.1613	5.76e-07	3.88e-06	1	0.37	1.29538	0.160732	0.394666	0	0.39	1.30814	0.109335	0.194855	0	4.7148	6.00194	5.9878	6.37532	NOSTRIN	nitric oxide synthase trafficker	115677	607496	2, 2
8046201	-1.47	0.360677	7.91e-10	5.08e-07	-1	-2.26	0.209109	7.48e-13	6.76e-10	-1	-0.79	0.579768	1.64e-05	0.000306548	0	1.66	3.16454	1.34e-11	3.53e-09	1	0.19	1.14138	0.152783	0.384606	0	-0.6	0.661735	8.37e-05	0.00142364	0	6.66228	8.1335	8.91995	8.32428	SSB	Sjogren syndrome antigen B (autoantigen La)	6741	109090	2
8046380	-1.47	0.362148	3.17e-05	0.000253282	-1	-2.4	0.189585	5.71e-08	4.74e-07	-1	-0.93	0.523502	0.00294922	0.0100056	0	2.12	4.36062	1.95e-08	3.63e-07	1	0.66	1.57919	0.0145974	0.118918	0	-0.27	0.82671	0.263652	0.373507	0	5.69376	7.15911	8.09284	7.81829	ITGA6	integrin, alpha 6	3655	147556, 226730	2
8046515	-1.88	0.270759	5.95e-07	2.11e-05	-1	-2.67	0.156833	4.4e-09	8.73e-08	-1	-0.79	0.579235	0.00783921	0.0206582	0	1.98	3.95085	6.16e-08	8.03e-07	1	0.1	1.06973	0.693845	0.842135	0	-0.69	0.619623	0.00701388	0.0276313	0	8.02133	9.90625	10.694	10.0035	H3F3A	H3 histone, family 3A	3020	601128	1
8047097	-1.35	0.392323	3.64e-07	1.65e-05	-1	-1.99	0.25107	1.8e-09	4.98e-08	-1	-0.64	0.639958	0.00255878	0.00901966	0	1.96	3.89487	1.41e-10	1.52e-08	1	0.61	1.52805	0.0016032	0.0413689	0	-0.03	0.977887	0.846378	0.886013	0	4.03499	5.38488	6.02883	5.99657	GLS	glutaminase	2744	138280	2
8047127	-1.13	0.455665	0.000237012	0.0010619	-1	-1.81	0.286117	1.08e-06	4.24e-06	-1	-0.67	0.62791	0.0151135	0.0338537	0	1.76	3.37535	6.12e-08	8.01e-07	1	0.62	1.53803	0.0116201	0.106292	0	-0.05	0.965744	0.817625	0.864776	0	5.12993	6.26388	6.93525	6.88496	MYO1B	myosin IB	4430	606537	2
8047161	-1.15	0.44963	0.00169665	0.00466567	-1	-1.29	0.408642	0.000884898	0.0013595	-1	-0.14	0.90884	0.667293	0.726656	0	1.67	3.17253	3.59e-06	1.54e-05	1	0.51	1.42647	0.0813582	0.280146	0	0.37	1.29643	0.173854	0.273714	0	5.07849	6.23168	6.36958	6.74412	OBFC2A	oligonucleotide/oligosaccharide-binding fold containing 2A	64859	612103	2, 2
8047223	-1.02	0.493841	0.000166575	0.000820563	-1	-1.99	0.251471	1.76e-08	2.17e-07	-1	-0.97	0.509214	0.000206605	0.00155128	0	1.3	2.45907	1.15e-06	6.47e-06	1	0.28	1.21439	0.170409	0.406269	0	-0.69	0.618386	0.00116863	0.00833832	0	3.37282	4.3907	5.36436	4.67093	HSPE1	heat shock 10kDa protein 1 (chaperonin 10)	3336	600141	2
8047272	-1.29	0.407852	4.79e-07	1.84e-05	-1	-1.96	0.256367	1.43e-09	4.44e-08	-1	-0.67	0.628579	0.00146464	0.00612236	0	1.42	2.67215	2.09e-08	3.85e-07	1	0.12	1.08984	0.458453	0.686153	0	-0.55	0.685052	0.00238143	0.01337	0	4.8395	6.13339	6.80322	6.25751	LOC26010	viral DNA polymerase-transactivated protein 6	26010	NA	2, 2, 2
8048120	-1.16	0.448585	0.000607169	0.00212247	-1	-1.94	0.261284	2.1e-06	7.21e-06	-1	-0.78	0.582462	0.0121589	0.028675	0	1.14	2.20434	0.000127892	0.00028902	1	-0.02	0.988835	0.949401	0.978368	0	-0.8	0.575959	0.00327906	0.0165329	0	4.60768	5.76423	6.54399	5.74803	ATIC	5-aminoimidazole-4-carboxamide ribonucleotide formyltransferase/IMP cyclohydrolase	471	601731, 608688	2
8048835	-1.5	0.352973	1.12e-06	3.04e-05	-1	-2.09	0.234853	9.44e-09	1.4e-07	-1	-0.59	0.665359	0.0145729	0.0329261	0	1.82	3.53818	4.42e-09	1.34e-07	1	0.32	1.24888	0.120956	0.341205	0	-0.27	0.830953	0.169118	0.268073	0	4.62617	6.12854	6.71634	6.44917	MFF	mitochondrial fission factor	56947	NA	2
8048847	-1.05	0.482095	3.51e-05	0.000273247	-1	-2.02	0.246682	3.68e-09	7.7e-08	-1	-0.97	0.511687	8.5e-05	0.0008695	0	1.39	2.62574	8.35e-08	9.84e-07	1	0.34	1.26585	0.0710537	0.263828	0	-0.63	0.647721	0.00140283	0.0094365	0	4.95756	6.01017	6.97684	6.35029	AGFG1	ArfGAP with FG repeats 1	3267	600862	2
8049180	-1.34	0.395694	5.63e-05	0.000376538	-1	-1.91	0.265497	7.25e-07	3.15e-06	-1	-0.58	0.670967	0.0401152	0.0723828	0	1.27	2.41429	1.79e-05	5.52e-05	1	-0.07	0.955319	0.78276	0.894548	0	-0.64	0.640987	0.00895526	0.0326845	0	5.3607	6.69825	7.27393	6.6323	EIF4E2	eukaryotic translation initiation factor 4E family member 2	9470	605895	2
8049530	-1.57	0.337778	2.26e-10	2.71e-07	-1	-1.17	0.443762	2.3e-08	2.57e-07	-1	0.39	1.31377	0.00819965	0.0214164	0	1.69	3.21943	2.09e-12	1.63e-09	1	0.12	1.08745	0.343299	0.589568	0	0.51	1.42866	0.000145421	0.00204845	0	5.78497	7.35082	6.95711	7.47177	LRRFIP1	leucine rich repeat (in FLII) interacting protein 1	9208	603256	2, 2, 2
8049827	-1.05	0.482421	5.68e-05	0.000379367	-1	-1.55	0.341786	1.44e-06	5.33e-06	-1	-0.5	0.708481	0.031763	0.060299	0	1.4	2.63484	1.77e-07	1.66e-06	1	0.35	1.2711	0.0777594	0.274632	0	-0.15	0.900553	0.428476	0.535522	0	5.5771	6.62873	7.12593	6.97481	2012-09-02	septin 2	4735	601506	2, 2
8049961	-2.6	0.165344	8.26e-05	0.000490093	-1	-2.15	0.225627	0.00131923	0.0019601	-1	0.45	1.36459	0.41593	0.493919	0	2.68	6.42448	1.83e-05	5.61e-05	1	0.09	1.06225	0.858509	0.934139	0	0.54	1.44953	0.265067	0.374929	0	6.04595	8.64241	8.19394	8.72953	LOC728323	hypothetical LOC728323	728323	NA	2
8050071	-1.47	0.360889	1.72e-05	0.000169007	-1	-1.16	0.446467	0.00039549	0.000649211	-1	0.31	1.23713	0.256051	0.329437	0	1.14	2.21021	5.75e-05	0.000145233	1	-0.33	0.797641	0.17954	0.418366	0	-0.02	0.986784	0.931986	0.953532	0	4.59453	6.0649	5.75791	5.73871	ADI1	acireductone dioxygenase 1	55256	NA	2
8050176	-1.91	0.265328	7.21e-10	4.92e-07	-1	-2.73	0.15063	1.02e-12	7.44e-10	-1	-0.82	0.567712	0.000166892	0.00134635	0	2.15	4.44889	4.3e-12	2.05e-09	1	0.24	1.18041	0.157131	0.390811	0	-0.58	0.670134	0.000985511	0.00741406	0	4.02735	5.9415	6.75827	6.18079	ITGB1BP1	integrin beta 1 binding protein 1	9270	607153	2
8050240	-1.8	0.28653	1.8e-06	3.99e-05	-1	-2.37	0.193667	3.47e-08	3.36e-07	-1	-0.57	0.675906	0.0501641	0.0863126	0	1.95	3.85439	4.21e-08	6.21e-07	1	0.14	1.1044	0.564386	0.763622	0	-0.42	0.746468	0.0793864	0.153806	0	5.20983	7.01308	7.57818	7.15634	ODC1	ornithine decarboxylase 1	4953	114500, 165640	2
8050908	-1.35	0.392348	1.46e-05	0.000150635	-1	-2.21	0.21641	9.83e-09	1.45e-07	-1	-0.86	0.551576	0.00148624	0.00617741	0	1.4	2.63225	9.03e-07	5.42e-06	1	0.05	1.03276	0.829049	0.917798	0	-0.81	0.569645	0.000489205	0.00465	0	5.83739	7.18719	8.04556	7.23369	HADHA	hydroxyacyl-Coenzyme A dehydrogenase/3-ketoacyl-Coenzyme A thiolase/enoyl-Coenzyme A hydratase (trifunctional protein), alpha subunit	3030	600890, 609015, 609016	2
8051066	-1.22	0.428671	1.19e-05	0.000132027	-1	-1.6	0.330445	3.29e-07	1.71e-06	-1	-0.38	0.770859	0.0893517	0.138226	0	1.19	2.28784	1.61e-06	8.32e-06	1	-0.03	0.980731	0.88361	0.947678	0	-0.4	0.756005	0.0330252	0.0812511	0	5.0793	6.30136	6.67682	6.27329	MPV17	MpV17 mitochondrial inner membrane protein	4358	137960, 251880	2
8051204	-1.19	0.437096	6.06e-06	8.51e-05	-1	-1.75	0.296607	2.52e-08	2.7e-07	-1	-0.56	0.678586	0.00964824	0.0240075	0	1.63	3.09387	2.69e-09	9.47e-08	1	0.44	1.35232	0.0215153	0.142516	0	-0.12	0.917664	0.463045	0.566422	0	4.91534	6.10931	6.66871	6.54475	SUPT7L	suppressor of Ty 7 (S. cerevisiae)-like	9913	NA	2
8051443	-1.01	0.496654	6.23e-05	0.000401292	-1	-1.71	0.305489	7.05e-08	5.54e-07	-1	-0.7	0.615095	0.00221095	0.00810458	0	1.33	2.51864	1.84e-07	1.7e-06	1	0.32	1.25089	0.0868282	0.290008	0	-0.38	0.769417	0.0392762	0.0919529	0	5.44926	6.45895	7.16007	6.78191	STRN	striatin, calmodulin binding protein	6801	NA	2
8051622	-1.2	0.436385	0.000243319	0.00107856	-1	-2.13	0.228852	2.06e-07	1.2e-06	-1	-0.93	0.524426	0.00225978	0.00821744	0	1.65	3.14205	5.07e-07	3.56e-06	1	0.46	1.37114	0.0708179	0.263303	0	-0.48	0.719064	0.0495089	0.10878	0	6.2149	7.41122	8.34241	7.8666	SFRS7	splicing factor, arginine/serine-rich 7, 35kDa	6432	600572	2
8051670	-1.8	0.287823	6.01e-07	2.11e-05	-1	-2.65	0.158932	1.27e-09	4.05e-08	-1	-0.86	0.552188	0.00264023	0.00921172	0	2.36	5.14886	3.96e-10	2.86e-08	1	0.57	1.48196	0.0205294	0.140167	0	-0.29	0.81832	0.18877	0.291199	0	4.20057	5.99732	6.85409	6.56483	SOS1	son of sevenless homolog 1 (Drosophila)	6654	135300, 182530, 610733	2
8051928	-1.56	0.339531	2.48e-10	2.71e-07	-1	-2.44	0.184704	1.58e-13	4.55e-10	-1	-0.88	0.543997	3.51e-06	0.000113876	0	1.76	3.39857	1.64e-12	1.63e-09	1	0.21	1.15392	0.116103	0.334073	0	-0.67	0.627728	1.62e-05	0.000459913	0	3.67556	5.23394	6.11227	5.44049	PREPL	prolyl endopeptidase-like	9581	606407, 609557	2
8052010	-1.3	0.405968	0.000553382	0.00197551	-1	-2.04	0.243906	3.81e-06	1.17e-05	-1	-0.74	0.600801	0.0291869	0.0564575	0	1.98	3.94891	3.59e-07	2.76e-06	1	0.68	1.60313	0.0245515	0.15323	0	-0.05	0.963163	0.840811	0.881654	0	5.89647	7.19703	7.93207	7.87792	CALM2	calmodulin 2 (phosphorylase kinase, delta)	805	114182	2
8052250	-1.63	0.323737	0.000201166	0.000939162	-1	-2.5	0.177386	1.71e-06	6.14e-06	-1	-0.87	0.547931	0.0253672	0.0507391	0	1.93	3.80515	4.45e-06	1.83e-05	1	0.3	1.23187	0.360037	0.603521	0	-0.57	0.67498	0.0794973	0.153912	0	3.64867	5.27578	6.14371	5.57663	MTIF2	mitochondrial translational initiation factor 2	4528	603766	2, 2
8052382	-1.74	0.298543	9.46e-07	2.77e-05	-1	-2.37	0.193618	2.11e-08	2.45e-07	-1	-0.62	0.648543	0.0247897	0.0498106	0	2.43	5.37091	4.04e-10	2.86e-08	1	0.68	1.60345	0.00706949	0.0835423	0	0.06	1.03991	0.801733	0.852256	0	3.85057	5.59456	6.21928	6.27574	FANCL	Fanconi anemia, complementation group L	55120	608111	2
8052526	-1.43	0.370704	0.00053087	0.00191769	-1	-2.35	0.195853	2.45e-06	8.19e-06	-1	-0.92	0.528327	0.015174	0.0339335	0	2.12	4.33631	7.5e-07	4.72e-06	1	0.68	1.60749	0.0387467	0.193792	0	-0.24	0.849279	0.438218	0.544932	0	4.40133	5.83299	6.75349	6.5178	XPO1	exportin 1 (CRM1 homolog, yeast)	7514	602559	2
8052721	-1.95	0.259031	0.00115879	0.00349619	-1	-2.75	0.14911	5.68e-05	0.000115431	-1	-0.8	0.575645	0.137446	0.197883	0	2.43	5.39485	2.34e-05	6.88e-05	1	0.48	1.39743	0.3047	0.551861	0	-0.31	0.804426	0.483453	0.584842	0	4.17515	6.12395	6.9207	6.60674	PPP3R1	protein phosphatase 3 (formerly 2B), regulatory subunit B, alpha isoform	5534	601302	2
8052762	-1.21	0.432747	0.000108365	0.000598675	-1	-1.76	0.295321	1.61e-06	5.86e-06	-1	-0.55	0.682434	0.0412035	0.073799	0	1.56	2.95631	5.48e-07	3.77e-06	1	0.36	1.27933	0.130532	0.356573	0	-0.2	0.87306	0.37604	0.486507	0	4.41486	5.62327	6.17451	5.97866	GFPT1	glutamine-fructose-6-phosphate transaminase 1	2673	138292	2
8052845	-1.38	0.385489	5.68e-07	2.06e-05	-1	-1.81	0.286176	3.21e-08	3.21e-07	-1	-0.43	0.742371	0.043444	0.0771045	0	2.01	4.02353	1.28e-10	1.47e-08	1	0.63	1.55103	0.00161979	0.0413689	0	0.2	1.15144	0.253185	0.361994	0	5.85033	7.22556	7.65535	7.85879	TIA1	TIA1 cytotoxic granule-associated RNA binding protein	7072	603518	2
8053562	-1.35	0.391534	8.03e-08	7.68e-06	-1	-1.61	0.327173	1.24e-08	1.7e-07	-1	-0.26	0.835618	0.14524	0.206801	0	1.28	2.4306	5.17e-08	7.2e-07	1	-0.07	0.951663	0.649184	0.816648	0	-0.33	0.795227	0.0366861	0.0874777	0	6.23456	7.58735	7.84643	7.51587	VPS24	vacuolar protein sorting 24 homolog (S. cerevisiae)	51652	610052	2
8053733	-1.39	0.382608	0.000984484	0.0030703	-1	-1.69	0.309048	0.000248694	0.000427634	-1	-0.31	0.80774	0.404327	0.482552	0	1.02	2.03057	0.00470852	0.00704088	1	-0.36	0.776911	0.272026	0.520027	0	-0.67	0.627543	0.0415076	0.0959322	0	6.0703	7.45636	7.7644	7.09218	SETD8	SET domain containing (lysine methyltransferase) 8	387893	607240	12
8053801	-1.13	0.458295	0.000445921	0.00168372	-1	-1.94	0.260538	9.71e-07	3.93e-06	-1	-0.81	0.568494	0.00640694	0.0178295	0	2.03	4.08037	2.2e-08	3.96e-07	1	0.9	1.87002	0.00109076	0.0359772	0	0.09	1.06309	0.70609	0.778836	0	5.35648	6.48213	7.29691	7.38518	ANKRD36B	ankyrin repeat domain 36B	57730	NA	2
8053834	-1.47	0.36022	0.00300956	0.00730406	-1	-2.28	0.205538	3.85e-05	8.27e-05	-1	-0.81	0.570589	0.0704795	0.114	0	2.54	5.82814	7.07e-07	4.52e-06	1	1.07	2.09941	0.0107358	0.102171	0	0.26	1.1979	0.471901	0.574665	0	4.98371	6.45676	7.26623	7.52674	ANKRD36B	ankyrin repeat domain 36B	57730	NA	2
8053909	-1.06	0.478712	6.15e-05	0.000397267	-1	-1.53	0.347077	7.2e-07	3.14e-06	-1	-0.46	0.725022	0.0385663	0.0702263	0	1.17	2.24603	2.86e-06	1.29e-05	1	0.1	1.0752	0.58615	0.776819	0	-0.36	0.779545	0.0569948	0.120762	0	5.37715	6.43992	6.90382	6.54452	SNRNP200	small nuclear ribonucleoprotein 200kDa (U5)	23020	601664	2
8054467	-1.27	0.414652	0.00705027	0.0144998	-1	-2.23	0.213771	6.27e-05	0.000125935	-1	-0.96	0.515543	0.0339228	0.0634405	0	1.93	3.81873	3.5e-05	9.57e-05	1	0.66	1.58344	0.0918924	0.296743	0	-0.29	0.816331	0.425272	0.532356	0	5.11196	6.38199	7.33783	7.04505	2012-09-10	septin 10	151011	611737	2
8055060	-1.09	0.470394	6.38e-05	0.000407384	-1	-1.99	0.251635	3.03e-08	3.1e-07	-1	-0.9	0.534945	0.000505582	0.00290533	0	1.51	2.85186	8.39e-08	9.88e-07	1	0.42	1.3415	0.0404302	0.197649	0	-0.48	0.717627	0.0194347	0.0559496	0	5.22636	6.31441	7.21695	6.73826	WDR33	WD repeat domain 33	55339	NA	2, 2, 2
8055096	-1.04	0.48728	4.56e-05	0.000327206	-1	-1.33	0.399024	3.85e-06	1.18e-05	-1	-0.29	0.818881	0.169917	0.234605	0	1.14	2.20343	2.45e-06	1.14e-05	1	0.1	1.07368	0.577021	0.771053	0	-0.19	0.87922	0.296619	0.408202	0	3.9102	4.94738	5.23566	5.04995	AMMECR1L	AMME chromosomal region gene 1-like	83607	NA	2
8055202	-1.96	0.257553	6.74e-05	0.000424808	-1	-2.1	0.233274	6.6e-05	0.000131688	-1	-0.14	0.905731	0.723279	0.77519	0	1.39	2.62196	0.000696648	0.00125869	1	-0.57	0.675294	0.122807	0.344293	0	-0.71	0.611635	0.0493833	0.108635	0	4.75452	6.71158	6.85442	6.14517	---	---	NA	NA
8055261	-1.14	0.454739	1.12e-06	3.04e-05	-1	-1.53	0.345995	2.4e-08	2.64e-07	-1	-0.39	0.760865	0.0298563	0.0573466	0	1.17	2.25143	8.16e-08	9.69e-07	1	0.03	1.02381	0.823879	0.915319	0	-0.36	0.778984	0.0207899	0.0588253	0	5.23498	6.37187	6.76615	6.40582	RAB6C	RAB6C, member RAS oncogene family	84084	NA	2
8055624	-1.5	0.352618	2.23e-05	0.000202775	-1	-2.1	0.233613	2.24e-07	1.28e-06	-1	-0.59	0.662509	0.0397361	0.0719369	0	2.26	4.77752	2.33e-09	8.87e-08	1	0.75	1.68464	0.00534221	0.0726315	0	0.16	1.11609	0.492454	0.593562	0	4.38667	5.89049	6.48448	6.64293	ZEB2	zinc finger E-box binding homeobox 2	9839	235730, 605802	2
8056060	-1.19	0.43889	1.15e-07	8.62e-06	-1	-1.64	0.319876	9.01e-10	3.31e-08	-1	-0.46	0.72883	0.00666571	0.0183765	0	1.65	3.13414	1.61e-11	3.75e-09	1	0.46	1.37554	0.00251739	0.0512767	0	0	1.00254	0.977609	0.984181	0	6.05156	7.23963	7.69598	7.69963	BAZ2B	bromodomain adjacent to zinc finger domain, 2B	29994	605683	2
8056151	-1.8	0.287991	5.74e-11	1.26e-07	-1	-2.19	0.21881	1.1e-11	2.8e-09	-1	-0.4	0.759781	0.0190813	0.0405006	0	1.93	3.80858	2.94e-12	1.92e-09	1	0.13	1.09684	0.342618	0.589271	0	-0.26	0.833356	0.067259	0.135923	0	4.36575	6.16166	6.558	6.295	PLA2R1	phospholipase A2 receptor 1, 180kDa	22925	604939	2, 2
8056792	-1.37	0.386759	0.0232333	0.0389092	-1	-1.8	0.286798	0.00614626	0.0082123	-1	-0.43	0.741543	0.445915	0.522545	0	1.61	3.05317	0.00357452	0.00547933	1	0.24	1.18084	0.632969	0.807161	0	-0.19	0.875643	0.690264	0.765397	0	5.55617	6.92666	7.35806	7.16648	---	---	NA	NA
8056909	-1.68	0.312968	1.93e-08	3.46e-06	-1	-2.29	0.204351	4.15e-10	2.13e-08	-1	-0.61	0.652945	0.00536045	0.0156588	0	2.16	4.47827	3.45e-11	6.81e-09	1	0.49	1.40155	0.0111132	0.103636	0	-0.13	0.915138	0.467091	0.569862	0	4.29039	5.96631	6.58127	6.45334	ATF2	activating transcription factor 2	1386	123811	2
8056943	-1.08	0.472833	0.000946419	0.00297878	-1	-1.8	0.286502	4.75e-06	1.4e-05	-1	-0.72	0.605926	0.0172023	0.0372722	0	1.29	2.44258	2.75e-05	7.84e-05	1	0.21	1.15493	0.411586	0.647304	0	-0.51	0.699802	0.0419953	0.0967369	0	3.88567	4.96627	5.68906	5.17407	KIAA1715	KIAA1715	80856	610236	2
8057561	-1.88	0.272298	1.32e-05	0.000141246	-1	-2.36	0.194263	1.16e-06	4.5e-06	-1	-0.49	0.713422	0.158434	0.221605	0	1.95	3.87674	1.23e-06	6.79e-06	1	0.08	1.05563	0.795127	0.90052	0	-0.41	0.753108	0.165338	0.263841	0	4.85691	6.73365	7.22082	6.81175	ZC3H15	zinc finger CCCH-type containing 15	NA	NA
8057719	-1.69	0.309135	2.9e-06	5.36e-05	-1	-2.35	0.195801	2.48e-08	2.67e-07	-1	-0.66	0.633381	0.0210455	0.0437332	0	2.14	4.41367	5.57e-09	1.55e-07	1	0.45	1.36442	0.0731524	0.267271	0	-0.21	0.864198	0.356743	0.468753	0	5.58102	7.27471	7.93356	7.72299	HIBCH	3-hydroxyisobutyryl-Coenzyme A hydrolase	26275	250620, 610690	2
8057933	-1.07	0.477885	0.00112727	0.00342293	-1	-2.01	0.24866	1.83e-06	6.48e-06	-1	-0.94	0.520334	0.00346156	0.0113356	0	1.38	2.60747	1.48e-05	4.73e-05	1	0.32	1.24607	0.219296	0.46372	0	-0.63	0.648371	0.0192397	0.0555638	0	4.38635	5.45161	6.3941	5.769	GTF3C3	general transcription factor IIIC, polypeptide 3, 102kDa	9330	604888	2
8058221	-1.25	0.420645	5.78e-06	8.27e-05	-1	-1.57	0.337517	5.47e-07	2.53e-06	-1	-0.32	0.802379	0.14438	0.205845	0	1.35	2.55596	2.38e-07	2.05e-06	1	0.1	1.07515	0.579299	0.772233	0	-0.21	0.862677	0.247206	0.356022	0	4.02297	5.2723	5.58994	5.37684	TRAK2	trafficking protein, kinesin binding 2	66008	607334	2
8058477	-1	0.499692	4.12e-05	0.000303999	-1	-1.15	0.450141	1.03e-05	2.69e-05	-1	-0.15	0.900837	0.440422	0.517495	0	1.2	2.30477	2.72e-07	2.26e-06	1	0.2	1.15168	0.245541	0.491628	0	0.05	1.03747	0.745215	0.808531	0	5.55885	6.55974	6.7104	6.76348	KLF7	Kruppel-like factor 7 (ubiquitous)	8609	604865	2
8058552	-1.69	0.309239	3.74e-05	0.000283653	-1	-1.93	0.26258	6.15e-06	1.73e-05	-1	-0.24	0.849117	0.462191	0.539075	0	1.44	2.70768	1.77e-05	5.46e-05	1	-0.26	0.837318	0.374138	0.616848	0	-0.49	0.710981	0.0708749	0.141426	0	4.87291	6.56612	6.80208	6.30996	IDH1	isocitrate dehydrogenase 1 (NADP+), soluble	3417	147700	2
8058570	-1.04	0.487466	1.52e-05	0.000155337	-1	-1.88	0.270848	5e-09	9.44e-08	-1	-0.85	0.555623	0.000181761	0.00142425	0	1.76	3.37981	4.06e-10	2.86e-08	1	0.72	1.64754	0.000261382	0.0183152	0	-0.13	0.915414	0.440459	0.546934	0	3.54501	4.58163	5.42946	5.30195	C2orf67	chromosome 2 open reading frame 67	151050	NA	2
8058765	-1.87	0.273931	6.7e-05	0.000422738	-1	-2.82	0.141821	2.9e-07	1.56e-06	-1	-0.95	0.517726	0.0175578	0.0378998	0	2.57	5.9334	6.89e-08	8.75e-07	1	0.7	1.62534	0.0467519	0.213012	0	-0.25	0.841481	0.431884	0.538809	0	4.82022	6.68834	7.63808	7.38908	FN1	fibronectin 1	2335	135600, 601894	2, 2
8058857	-1.04	0.485584	0.0101081	0.0194562	-1	-1.29	0.409267	0.0025441	0.00360602	-1	-0.25	0.842836	0.499894	0.573925	0	1.3	2.45407	0.000480955	0.000908942	1	0.25	1.19166	0.44242	0.673175	0	0.01	1.00437	0.983595	0.988024	0	6.87209	7.9143	8.16097	8.16727	IGFBP5	insulin-like growth factor binding protein 5	3488	146734	2
8058927	-1.77	0.294115	6.04e-05	0.000394631	-1	-2.45	0.182672	1e-06	4.04e-06	-1	-0.69	0.62109	0.0609138	0.101208	0	1.4	2.63847	0.000152323	0.00033447	1	-0.37	0.776012	0.254315	0.501791	0	-1.05	0.481973	0.00162833	0.0104255	-1	6.13682	7.90237	8.5895	7.53652	TMBIM1	transmembrane BAX inhibitor motif containing 1	64114	610364	2
8059905	-1.23	0.426139	0.000110162	0.000604489	-1	-1.36	0.390419	5.06e-05	0.000104543	-1	-0.13	0.916178	0.626533	0.690944	0	1.74	3.35046	8.69e-08	1.01e-06	1	0.51	1.42776	0.0350761	0.184335	0	0.39	1.30808	0.0861673	0.16341	0	6.27718	7.50778	7.63408	8.02154	COL6A3	collagen, type VI, alpha 3	1293	120250, 158810, 254090	2
8060063	-1.07	0.476241	3.19e-06	5.79e-05	-1	-1.26	0.418805	5.8e-07	2.65e-06	-1	-0.19	0.879397	0.288287	0.363909	0	1.12	2.17867	1.67e-07	1.58e-06	1	0.05	1.03757	0.729522	0.863105	0	-0.13	0.91244	0.370298	0.481414	0	5.74091	6.81114	6.99656	6.86436	NDUFA10	NADH dehydrogenase (ubiquinone) 1 alpha subcomplex, 10, 42kDa	4705	603835	2
8060734	-1.18	0.442154	0.0185577	0.032235	-1	-2.02	0.246158	0.000378464	0.000624924	-1	-0.84	0.556726	0.0762782	0.121508	0	1.96	3.90227	5.7e-05	0.000144215	1	0.79	1.7254	0.064444	0.250004	0	-0.06	0.960575	0.881254	0.914191	0	4.38994	5.56732	6.41229	6.35426	hsa-mir-103-2 /// hsa-mir-103-2-as /// AF480544	hsa-mir-103-2 /// hsa-mir-103-2-as /// AF480544	NA	NA
8060813	-1.17	0.443104	0.000150075	0.000760414	-1	-1.31	0.403162	8.35e-05	0.000161931	-1	-0.14	0.909858	0.597906	0.664427	0	1.44	2.71415	2.06e-06	9.97e-06	1	0.27	1.20265	0.252964	0.500026	0	0.13	1.09424	0.556392	0.653717	0	3.75269	4.92697	5.06326	5.19319	MCM8	minichromosome maintenance complex component 8	84515	608187	20
8061114	-1.25	0.41922	0.00559079	0.0120135	-1	-2.13	0.228109	7.13e-05	0.000140817	-1	-0.88	0.544126	0.0421045	0.0750588	0	1.55	2.9275	0.000303529	0.000610801	1	0.3	1.22727	0.422087	0.655236	0	-0.58	0.667788	0.109116	0.194659	0	4.83694	6.09116	6.96915	6.38661	DSTN	destrin (actin depolymerizing factor)	11034	609114	20
8061772	-1.44	0.368212	6.51e-08	6.82e-06	-1	-1.64	0.320144	1.79e-08	2.2e-07	-1	-0.2	0.869457	0.272952	0.34742	0	1.52	2.87137	3.19e-09	1.07e-07	1	0.08	1.05727	0.621842	0.799219	0	-0.12	0.919251	0.437215	0.544018	0	5.46288	6.90427	7.10608	6.98461	MAPRE1	microtubule-associated protein, RP/EB family, member 1	22919	603108	20
8061986	-1.12	0.460926	4.09e-06	6.72e-05	-1	-2.06	0.2398	8.39e-10	3.15e-08	-1	-0.94	0.520256	4.49e-05	0.000574823	0	1.58	2.98018	2.65e-09	9.42e-08	1	0.46	1.37364	0.0103621	0.100952	0	-0.48	0.714646	0.00636763	0.0258273	0	5.11222	6.22961	7.17232	6.68762	ITCH	itchy E3 ubiquitin protein ligase homolog (mouse)	83737	606409	20
8062284	-1.05	0.482307	0.0041025	0.00936599	-1	-1.13	0.457589	0.00344772	0.00478201	-1	-0.08	0.948752	0.81652	0.855249	0	1.21	2.30829	0.000341844	0.000676615	1	0.15	1.1133	0.596642	0.783034	0	0.08	1.05625	0.776371	0.83193	0	3.75882	4.8108	4.8867	4.96565	---	---	NA	NA
[truncated: 5,778 more rows]
