# Supplementary material for: Homeostatic Tissue Responses in Skin Biopsies from NOMID Patients with Constitutive Overproduction of IL-1β
Source: PLoS One. 2012 Nov 30;7(11):e49408. doi: 10.1371/journal.pone.0049408 (PMC3511496; doi:10.1371/journal.pone.0049408)
Supplement: Table S2 — Average level of gene expression, “mean per group” for each tissue state. (XLS) [file pone.0049408.s011.xls]

## Sheet: Table S4 MeanperGroup copy.csv
Mean per Group
	LS	NL	Normal	Post	Symbol	GeneName	ENTREZ	OMIM	ChromLoc
7892925	10.3928	9.4813	9.80292	9.51763	---	---	NA	NA
7893130	11.6408	10.952	11.323	11.05	---	---	NA	NA
7893613	10.651	9.75522	10.1182	9.78505	---	---	NA	NA
7893939	10.2679	9.25506	9.61479	9.31732	---	---	NA	NA
7895220	11.2326	10.4267	10.7438	10.4533	---	---	NA	NA
7896160	11.0001	10.0788	10.4038	10.1074	---	---	NA	NA
7896688	4.20706	5.16667	5.92498	5.67608	---	---	NA	NA
7896690	5.49895	5.51953	6.11772	5.46057	---	---	NA	NA
7896697	5.0036	4.21514	3.57195	4.18278	---	---	NA	NA
7896698	4.84182	5.75694	5.09347	5.3771	---	---	NA	NA
7896699	4.37954	3.6396	3.73436	3.89356	---	---	NA	NA
7896703	4.93326	4.12394	4.16258	4.17818	---	---	NA	NA
7896704	4.13532	4.7235	5.96955	5.76987	---	---	NA	NA
7896705	4.15462	4.1132	4.99205	4.48999	---	---	NA	NA
7896706	3.73399	3.43943	4.31543	3.12573	---	---	NA	NA
7896707	5.03947	5.10492	6.1515	5.10613	---	---	NA	NA
7896708	3.66803	3.93087	6.78364	4.97733	---	---	NA	NA
7896709	5.3047	5.59872	5.54437	5.52291	---	---	NA	NA
7896710	3.01726	2.95606	3.87645	2.89573	---	---	NA	NA
7896711	5.97393	5.35395	5.47599	5.89626	---	---	NA	NA
7896712	1.93423	2.23878	3.95571	1.87896	---	---	NA	NA
7896715	5.6758	4.92147	4.49805	4.83729	---	---	NA	NA
7896716	6.79675	7.69651	7.3235	7.6542	---	---	NA	NA
7896717	5.05567	4.11969	4.14389	4.39317	---	---	NA	NA
7896719	3.77265	3.02949	3.11092	2.8328	---	---	NA	NA
7896721	4.61595	8.14518	7.06882	8.01509	---	---	NA	NA
7896722	8.49657	9.48315	10.1515	10.0265	---	---	NA	NA
7896724	2.51323	2.19385	3.38287	2.67195	---	---	NA	NA
7896725	4.17603	3.68733	3.53437	3.63591	---	---	NA	NA	NA
7896726	4.58619	4.32055	4.22693	4.5027	---	---	NA	NA
7896727	4.97177	5.20045	5.7307	5.99901	---	---	NA	NA
7896728	3.76209	3.52151	4.43993	4.25074	---	---	NA	NA
7896730	4.66953	4.40584	3.91426	4.43408	---	---	NA	NA
7896736	3.80982	3.78844	3.71854	3.55944	---	---	NA	NA
7896742	6.36156	6.80863	6.66626	7.05376	C20orf69	chromosome 20 open reading frame 69	140849	NA
7896744	4.29789	3.71589	4.58314	3.82709	OR4F16	olfactory receptor, family 4, subfamily F, member 16	81399	NA	1, 1, 5
7896746	7.56966	7.86688	8.09849	7.18547	---	---	NA	NA
7896748	4.86695	6.7021	6.93177	6.52281	---	---	NA	NA
7896752	8.98223	8.88546	9.1885	8.85458	---	---	NA	NA
7896754	3.59455	3.89655	4.31495	3.94452	LOC100287934	similar to hCG2042721	NA	NA
7896983	5.40608	4.67587	4.11497	4.40415	LOC100288313	similar to hCG1820414	NA	NA
7897026	4.40318	4.35322	4.19563	4.37385	CALML6	calmodulin-like 6	163688	610171	1
7897078	5.62247	6.96071	7.59808	6.82129	RER1	RER1 retention in endoplasmic reticulum 1 homolog (S. cerevisiae)	11079	NA	1
7897128	4.83459	4.31193	3.7617	3.97956	ACTRT2	actin-related protein T2	140625	608535	1
7897227	4.37184	3.68811	3.17438	3.44653	AJAP1	adherens junctions associated protein 1	55966	610972	1, 1
7897277	4.51152	3.80729	3.56139	3.85405	C1orf211	chromosome 1 open reading frame 211	148645	NA
7897280	5.58261	4.69967	4.0234	4.45839	HES3	hairy and enhancer of split 3 (Drosophila)	390992	609971	1
7897286	6.57492	6.10066	5.39054	5.97652	UNQ6193	GSQS6193	100130071	NA
7897293	6.57657	6.24087	5.49249	5.98894	---	---	NA	NA
7897370	6.46516	7.4449	8.13466	7.59167	VAMP3	vesicle-associated membrane protein 3 (cellubrevin)	9341	603657	1
7897378	5.29328	5.52846	6.53518	6.28965	PER3	period homolog 3 (Drosophila)	8863	603427	1
7897404	7.14943	8.57982	8.6304	8.46575	PARK7	Parkinson disease (autosomal recessive, early onset) 7	11315	602533, 606324	1
7897416	4.88406	4.18099	3.85056	4.01788	SLC45A1	solute carrier family 45, member 1	NA	NA	NA
7897422	6.59127	5.50365	4.94038	5.29336	---	---	NA	NA
7897426	5.29663	6.36233	6.23019	5.998	CA6	carbonic anhydrase VI	765	114780	1
7897460	4.4674	4.55073	4.7348	4.61585	SLC25A33	solute carrier family 25, member 33	84275	610816	1
7897522	6.12265	6.79096	7.10371	7.10874	RBP7	retinol binding protein 7, cellular	116362	608604	1
7897527	5.91791	6.5814	7.58107	6.9123	UBE4B	ubiquitination factor E4B (UFD2 homolog, yeast)	10277	NA	1
7897561	5.15741	5.73101	6.44617	6.03012	KIF1B	kinesin family member 1B	23095	118210, 171300, 256700, 605995	1, 1
7897620	4.11474	5.59008	5.8067	4.9293	PGD	phosphogluconate dehydrogenase	5226	172200	1
7897663	6.95885	8.06378	8.40301	8.32356	TARDBP	TAR DNA binding protein	23435	605078, 612069	1
7897685	5.92045	6.25275	6.72538	5.73293	UBIAD1	UbiA prenyltransferase domain containing 1	29914	121800, 611632	1
7897801	3.96566	3.2279	2.60973	3.29779	RNU5E	RNA, U5E small nuclear	26829	NA
7897824	6.00135	6.83395	7.18525	6.66849	MFN2	mitofusin 2	9927	601152, 608507, 609260	1
7897890	4.9269	5.74067	6.69346	6.25715	VPS13D	vacuolar protein sorting 13 homolog D (S. cerevisiae)	55187	608877	1
7897960	4.8036	3.93629	5.26161	3.95157	AADACL3	arylacetamide deacetylase-like 3	126767	NA	1
7897964	4.73844	5.45679	7.16103	4.692	---	---	NA	NA
7897991	6.78081	5.83197	5.52521	5.92321	PRAMEF7	PRAME family member 7	441871	NA	1, 1
7898070	5.39923	6.11727	6.477	6.22616	PRDM2	PR domain containing 2, with ZNF domain	7799	601196	1, 1, 1, 1
7898084	5.5431	4.85129	4.23783	4.67086	RP1-21O18.1	kazrin	23254	NA	1, 1, 1, 1, 1
7898112	7.30693	6.40333	5.57024	6.27465	---	---	NA	NA
7898167	5.75583	5.28083	4.42288	4.95048	CTRC	chymotrypsin C (caldecrin)	11330	167800, 601405	1
7898211	4.44213	5.87496	6.17543	5.66332	DDI2	DDI1, DNA-damage inducible 1, homolog 2 (S. cerevisiae)	84301	NA	1
7898278	5.6666	6.14029	6.48079	6.31106	SPEN	spen homolog, transcriptional regulator (Drosophila)	23013	NA	1
7898314	4.87105	4.50856	3.92845	4.38861	CLCNKB	chloride channel Kb	1188	602023, 602522, 607364	1
7898328	5.85001	6.7074	7.12529	6.67901	C1orf144	chromosome 1 open reading frame 144	26099	NA	1
7898337	5.92007	6.39669	6.53299	6.27968	NECAP2	NECAP endocytosis associated 2	55707	611624	1
7898350	5.00857	4.31916	3.77627	4.08058	LOC440570	LOC440570	440570	NA
7898353	6.73084	5.763	5.26526	5.83269	LOC388692 /// LOC100133301 /// LOC644634	hypothetical LOC388692 /// UPF0627 protein ENSP00000364708 /// similar to UPF0627 protein ENSP00000358171	NA	NA
7898371	4.99726	4.36972	4.14289	4.70177	LOC644634	similar to UPF0627 protein ENSP00000358171	NA	NA
7898375	7.46618	8.01708	6.43757	7.12228	RNU1A	RNA, U1A small nuclear	6060	180680
7898411	7.46618	8.01708	6.43757	7.12228	RNU1A	RNA, U1A small nuclear	6060	180680
7898431	5.63533	4.73529	4.42977	4.63368	PADI3	peptidyl arginine deiminase, type III	51702	606755	1
7898516	4.29302	3.7373	3.1885	3.68468	ACTL8	actin-like 8	81569	NA	1
7898537	5.32711	4.62548	4.15584	4.35826	PAX7	paired box 7	5081	167410, 268220	1, 1
7898549	4.08404	4.97832	4.55638	4.30493	MRTO4	mRNA turnover 4 homolog (S. cerevisiae)	51154	NA	1
7898568	4.50373	4.00905	3.69836	3.93533	LOC644083	hypothetical LOC644083	644083	NA
7898570	6.69122	6.10057	5.61472	6.1314	---	---	NA	NA
7898574	8.41073	9.03371	9.6087	9.18036	C1orf151	chromosome 1 open reading frame 151	440574	NA	1
7898607	5.72523	4.90789	4.0152	4.77996	---	---	NA	NA
7898616	5.48358	4.94063	4.78312	4.69925	PLA2G2F	phospholipase A2, group IIF	64600	NA	1
7898677	5.23543	4.66609	4.15737	4.33138	HS6ST1	heparan sulfate 6-O-sulfotransferase 1	9394	604846	2
7898725	5.81198	4.91356	4.84624	4.91702	ELA3A	elastase 3A, pancreatic	10136	NA	1
7898739	5.1639	5.81126	6.33791	5.82431	CDC42	cell division cycle 42 (GTP binding protein, 25kDa)	998	116952	1, 1
7898805	5.5512	5.21914	4.98453	4.81467	C1QB	complement component 1, q subcomponent, B chain	713	120570	1
7898833	4.76213	6.18738	6.90821	6.66803	AOF2	amine oxidase (flavin containing) domain 2	23028	609132	1
7898854	5.13573	4.28711	4.07336	4.27026	---	---	NA	NA
7898856	7.34076	6.7225	5.87164	6.36796	---	---	NA	NA
7898869	4.55806	4.16087	3.59598	3.9689	MDS2	myelodysplastic syndrome 2 translocation associated	259283	607305	1
7898875	9.9328	10.186	10.4468	10.2979	RPL11	ribosomal protein L11	6135	604175, 612562	1
7898910	5.26575	7.68531	8.22325	7.84533	PNRC2	proline-rich nuclear receptor coactivator 2	55629	611882	1
7898916	5.71574	5.61991	6.71285	5.66046	GRHL3	grainyhead-like 3 (Drosophila)	57822	608317	1, 1
7898957	5.82733	6.08292	6.73824	6.33668	RCAN3	RCAN family member 3	11123	605860	1
7898988	6.9344	7.72401	8.11194	8.24695	CLIC4	chloride intracellular channel 4	25932	606536	1
7899005	4.56314	6.66553	7.88049	7.04143	TMEM50A	transmembrane protein 50A	23585	605348	1
7899016	5.21921	6.76536	7.32933	6.85847	SDHD	succinate dehydrogenase complex, subunit D, integral membrane protein	6392	114900, 168000, 171300, 602690, 606864, 612359	11
7899071	4.33101	3.47137	3.58325	3.39888	---	---	NA	NA
7899160	6.33794	6.63145	7.04082	6.61513	CD52	CD52 molecule	1043	114280	1
7899173	4.71289	5.36531	5.55644	5.0643	DHDDS	dehydrodolichyl diphosphate synthase	79947	608172	1
7899265	9.23623	9.36542	9.25305	8.91531	SFN	stratifin	2810	601290	1
7899273	6.89776	7.68237	7.30689	7.31089	NUDC	nuclear distribution gene C homolog (A. nidulans)	10726	610325	1
7899346	8.65915	9.27554	9.94492	9.38101	CCDC72	coiled-coil domain containing 72	51372	NA	3
7899348	5.29505	4.79597	4.50467	4.65013	---	---	NA	NA
7899361	5.58147	6.78636	7.9523	7.08217	STX12	syntaxin 12	23673	606892	1
7899424	6.78486	7.3774	7.34527	7.31261	ATPIF1	ATPase inhibitory factor 1	93974	NA	1
7899436	4.59078	4.06265	3.47195	3.69491	SESN2	sestrin 2	83667	607767	1
7899455	4.40677	5.91408	6.90758	6.26275	PHACTR4	phosphatase and actin regulator 4	65979	608726	1, 1
7899480	2.96156	3.41274	3.68096	2.69627	SNORA73A	small nucleolar RNA, H/ACA box 73A	6080	180645
7899499	5.2556	4.45276	3.93717	4.27878	RAB42	RAB42, member RAS oncogene family	115273	NA	1
7899502	4.59409	3.82843	3.40403	3.61737	RNU11	RNA, U11 small nuclear	26824	NA	1
7899534	4.426	5.43504	6.01928	5.27754	EPB41	erythrocyte membrane protein band 4.1 (elliptocytosis 1, RH-linked)	2035	130500, 611804	1
7899560	5.2378	5.24974	4.83333	4.97823	---	---	NA	NA
7899595	4.96057	4.08499	4.0711	4.13019	LOC100129196	similar to hCG2033298	100129196	NA
7899602	5.67592	6.54236	6.584	6.68594	---	---	NA	NA
7899688	4.30879	5.07135	5.84808	5.32988	KPNA6	karyopherin alpha 6 (importin alpha 7)	23633	610563	1
7899737	5.16112	6.95601	7.77933	6.56967	EIF3I	eukaryotic translation initiation factor 3, subunit I	8668	603911	1
7899750	5.43829	4.91649	4.36426	4.86525	FAM167B	family with sequence similarity 167, member B	84734	NA	1
7899774	5.00705	5.72599	6.24448	5.68583	HDAC1	histone deacetylase 1	3065	601241	1
7899790	4.73744	5.14357	5.06666	5.4845	TSSK3	testis-specific serine kinase 3	81629	607660	1
7899813	4.19787	5.57914	6.2032	5.96698	RBBP4	retinoblastoma binding protein 4	5928	602923	1, 1
7899829	4.59202	5.37123	6.25527	5.9081	S100PBP	S100P binding protein	64766	611889	1, 1
7899841	6.13294	5.35162	4.98039	5.25183	HPCA	hippocalcin	3208	142622	1
7899882	4.67019	4.06536	3.71152	3.87222	ZNF362	zinc finger protein 362	149076	NA	1
7899905	5.95842	5.10821	4.88839	5.16964	HMGB4	high-mobility group box 4	127540	NA	1, 1
7899909	5.16234	4.50829	5.92365	5.76793	---	---	NA	NA
7899921	4.93404	4.78369	5.8963	4.89614	GJB5	gap junction protein, beta 5, 31.1kDa	2709	604493	1
7899955	9.20635	9.22814	8.83247	9.23511	---	---	NA	NA
7899957	5.24287	6.45853	7.15926	7.13964	ZMYM4	zinc finger, MYM-type 4	9202	NA	1
7900009	4.98557	5.38324	6.24908	5.77405	EIF2C4	eukaryotic translation initiation factor 2C, 4	192670	607356	1
7900051	4.75278	5.52721	5.99547	6.01087	EIF2C3	eukaryotic translation initiation factor 2C, 3	192669	607355	1
7900076	5.65791	4.56596	4.24654	4.59018	TEKT2	tektin 2 (testicular)	27285	608953	1
7900119	5.45604	6.4857	7.09672	6.53305	THRAP3	thyroid hormone receptor associated protein 3	9967	603809	1
7900144	5.18938	4.21865	3.43869	3.71973	---	---	NA	NA
7900157	10.3909	10.6598	11.0267	10.6656	RPS27	ribosomal protein S27	6232	603702	1
7900183	5.4609	5.1578	4.31401	4.77332	MANEAL	mannosidase, endo-alpha-like	149175	NA	1, 1
7900197	3.58613	3.08565	4.20609	3.3517	---	---	NA	NA
7900201	5.55547	5.88961	6.49056	6.07044	UTP11L	UTP11-like, U3 small nucleolar ribonucleoprotein, (yeast)	51118	609440	1
7900228	7.6731	8.95828	9.64226	9.08285	NDUFS5	NADH dehydrogenase (ubiquinone) Fe-S protein 5, 15kDa (NADH-coenzyme Q reductase)	4725	603847	1
7900235	6.38575	7.37768	8.04012	7.76156	MACF1	microtubule-actin crosslinking factor 1	23499	608271	1, 1
7900336	5.30632	5.81924	6.43018	5.92144	MACF1	microtubule-actin crosslinking factor 1	NA	NA
7900350	4.67993	3.3416	3.18892	2.73006	---	---	NA	NA
7900354	4.44502	4.86466	5.18497	5.01489	PPIE	peptidylprolyl isomerase E (cyclophilin E)	10450	602435	1, 1
7900365	5.45706	5.11376	6.00131	5.2674	MFSD2	major facilitator superfamily domain containing 2	84879	NA	1
7900382	6.0687	8.01648	8.65477	8.01953	CAP1	CAP, adenylate cyclase-associated protein 1 (yeast)	10487	NA	1
7900395	4.35966	4.51416	5.35524	5.05545	RLF	rearranged L-myc fusion	6018	180610	1
7900413	4.23867	5.37139	6.7755	5.53392	ZMPSTE24	zinc metallopeptidase (STE24 homolog, S. cerevisiae)	10269	275210, 606480, 608612	1
7900426	5.26982	6.4798	6.7472	6.01413	SMAP2	small ArfGAP2	64744	NA	1
7900468	6.01106	6.67169	6.68746	6.60088	NFYC	nuclear transcription factor Y, gamma	4802	605344	1, 1
7900488	3.80465	4.0922	3.81212	3.86002	hsa-mir-30e	hsa-mir-30e	NA	NA
7900490	4.46805	3.73568	3.31579	3.7156	hsa-mir-30c-1	hsa-mir-30c-1	NA	NA
7900508	4.25984	3.31389	3.53789	3.67255	---	---	NA	NA
7900538	6.66398	5.97617	5.42281	5.79144	---	---	NA	NA
7900540	5.90572	5.26481	4.58602	5.07718	RIMKLA	ribosomal modification protein rimK-like family member A	284716	NA	1
7900546	5.06581	5.61161	6.19569	5.75083	PPCS	phosphopantothenoylcysteine synthetase	79717	609853	1
7900576	4.44686	5.16879	5.73849	5.1727	PPIH	peptidylprolyl isomerase H (cyclophilin H)	10465	606095	1
7900635	5.96366	6.18177	5.9257	6.12412	FAM183A	family with sequence similarity 183, member A	440585	NA	1
7900652	3.86069	3.88095	6.31023	4.03556	---	---	NA	NA
7900658	4.62678	4.37649	3.97196	4.46014	TIE1	tyrosine kinase with immunoglobulin-like and EGF-like domains 1	7075	600222	1
7900699	6.07242	5.10135	4.78109	5.09912	CDC20	cell division cycle 20 homolog (S. cerevisiae)	991	603618	1
7900911	4.92855	4.47082	3.84373	4.08697	DPH2	DPH2 homolog (S. cerevisiae)	1802	603456	1
7900922	5.02425	5.63961	5.81449	5.45923	ATP6V0B	ATPase, H+ transporting, lysosomal 21kDa, V0 subunit b	533	603717	1
7900957	5.37194	4.54932	3.98353	4.48368	KLF17	Kruppel-like factor 17	128209	609602	1
7901038	9.41774	9.90169	10.3824	9.94988	RPS8	ribosomal protein S8	6202	600357	1
7901048	6.28164	7.01548	7.50153	7.09764	SNORD46	small nucleolar RNA, C/D box 46	94161	NA	1
7901050	4.74374	4.92946	4.37669	4.84758	SNORD38A	small nucleolar RNA, C/D box 38A	94162	NA	1
7901052	3.66744	5.4274	6.91727	6.58796	SNORD38B	small nucleolar RNA, C/D box 38B	94163	NA	1
7901110	5.25579	5.88864	6.03181	5.73635	AKR1A1	aldo-keto reductase family 1, member A1 (aldehyde reductase)	10327	103830	1
7901123	5.7443	6.46618	6.34183	6.65529	NASP	nuclear autoantigenic sperm protein (histone-binding)	4678	603185	1
7901135	3.80004	4.15015	4.84485	4.26843	TMEM69	transmembrane protein 69	51249	NA	1
7901212	4.52105	5.4433	6.38868	5.15517	UQCRH	ubiquinol-cytochrome c reductase hinge protein	7388	NA	1
7901227	5.257	5.68564	5.69482	5.67529	---	---	NA	NA
7901253	4.57019	4.13788	4.52973	4.21635	C1orf223	chromosome 1 open reading frame 223	374973	NA	1
7901287	4.24225	3.99485	4.45113	3.91568	CYP4Z1	cytochrome P450, family 4, subfamily Z, polypeptide 1	199974	NA	1
7901293	5.74494	4.60867	3.99442	4.65304	CYP4A22	cytochrome P450, family 4, subfamily A, polypeptide 22	284541	NA	1
7901299	5.15643	6.70314	6.75843	6.67039	CMPK1	cytidine monophosphate (UMP-CMP) kinase 1, cytosolic	51727	191710	1
7901309	6.59211	6.12017	5.30194	5.63956	FOXE3	forkhead box E3	2301	107250, 601094, 610256	1
7901314	5.80217	5.3944	4.84842	5.22	---	---	NA	NA
7901336	3.346	3.73534	4.22554	4.11071	STRADB	STE20-related kinase adaptor beta	55437	607333	2
7901385	5.37279	6.19024	6.76142	6.52295	OSBPL9	oxysterol binding protein-like 9	114883	606737	1, 1, 1
7901418	4.41344	6.10515	7.77395	6.59659	BTF3L4	basic transcription factor 3-like 4	91408	NA	1
7901443	6.84413	6.59241	5.72664	6.28209	---	---	NA	NA
7901447	5.4606	6.3989	6.96121	6.72152	PRPF38A	PRP38 pre-mRNA processing factor 38 (yeast) domain containing A	84950	NA	1
7901479	4.69593	5.17781	5.91438	5.56628	ZYG11B	zyg-11 homolog B (C. elegans)	79699	NA	1
7901513	3.48709	4.78776	5.89868	5.00785	SCP2	sterol carrier protein 2	6342	184755	1, 1, 1
7901765	3.94249	4.14151	5.04624	4.10649	HOOK1	hook homolog 1 (Drosophila)	51361	607820	1
7901788	5.63612	6.86821	7.30732	6.9021	NFIA	nuclear factor I/A	4774	600727	1, 1, 1
7901804	5.09105	6.08358	6.84667	6.58526	INADL	InaD-like (Drosophila)	10207	603199	1
7901852	4.11582	4.41414	6.56414	5.27771	---	---	NA	NA
7901856	4.24766	4.58978	5.21384	4.52745	---	---	NA	NA
7901913	4.73445	4.0977	3.68469	4.03226	FOXD3	forkhead box D3	27022	607836, 611539	1
7901915	3.62351	4.20282	4.72333	4.41859	ALG6	asparagine-linked glycosylation 6, alpha-1,3-glucosyltransferase homolog (S. cerevisiae)	29929	603147, 604566	1
7901967	5.31255	4.64588	4.18925	4.59789	---	---	NA	NA
7901993	4.67068	5.65465	5.68695	5.90122	CACHD1	cache domain containing 1	57685	NA	1
7902038	5.97818	5.87448	5.01686	5.58721	AK3L1	adenylate kinase 3-like 1	205	103030	1, 1, 1
7902074	3.8333	4.50881	6.01508	5.1199	LEPR	leptin receptor	3953	601007	1, 1, 1
7902166	4.85589	5.51981	6.56124	5.96666	MIER1	mesoderm induction early response 1 homolog (Xenopus laevis)	57708	NA	1, 1, 1, 1
7902203	5.23713	4.5439	4.0197	4.30623	---	---	NA	NA
7902227	5.12968	5.97576	6.32848	5.94191	GADD45A	growth arrest and DNA-damage-inducible, alpha	1647	126335	1
7902265	6.39321	5.45718	4.97678	5.53883	---	---	NA	NA
7902269	8.95907	9.11856	8.7228	9.28879	SFRS11	splicing factor, arginine/serine-rich 11	9295	602010	1
7902282	5.66527	5.62061	5.16271	5.29145	HHLA3	HERV-H LTR-associating 3	11147	604372	1
7902308	3.23167	4.08274	5.15152	4.31292	FPGT	fucose-1-phosphate guanylyltransferase	8790	603609	1
7902345	4.71165	6.71865	7.37078	6.93176	TYW3	tRNA-yW synthesizing protein 3 homolog (S. cerevisiae)	127253	611245	1
7902353	4.40695	3.78062	3.14795	3.41942	LHX8	LIM homeobox 8	431707	604425	1
7902365	5.15069	4.11181	3.33605	4.08817	---	---	NA	NA
7902367	3.85944	6.09533	7.92672	6.40536	ACADM	acyl-Coenzyme A dehydrogenase, C-4 to C-12 straight chain	34	201450, 607008	1
7902382	3.69779	5.35257	7.13964	6.32277	RABGGTB	Rab geranylgeranyltransferase, beta subunit	5876	179080	1
7902400	2.09405	2.09101	3.44248	2.54983	SNORD45B	small nucleolar RNA, C/D box 45B	26804	NA	1
7902441	5.24753	4.64736	4.20674	4.56133	ST6GALNAC5	ST6 (alpha-N-acetyl-neuraminyl-2,3-beta-galactosyl-1,3)-N-acetylgalactosaminide alpha-2,6-sialyltransferase 5	81849	610134	1
7902448	8.85183	9.74453	10.6924	9.8645	RPL17	ribosomal protein L17	6139	603661	18
7902472	5.68654	5.78857	6.66461	6.33036	---	---	NA	NA
7902474	5.3995	6.29719	6.59593	6.5459	---	---	NA	NA
7902476	4.60568	4.87271	5.59586	5.44792	FAM73A	family with sequence similarity 73, member A	374986	NA	1
7902493	7.10352	6.43282	5.59778	5.95444	---	---	NA	NA
7902495	5.47209	7.01351	6.97605	7.32113	NEXN	nexilin (F actin binding protein)	91624	NA	1
7902512	4.07964	5.19494	6.1871	5.96751	DNAJB4	DnaJ (Hsp40) homolog, subfamily B, member 4	11080	611327	1
7902541	3.97222	4.1762	4.51335	4.94249	IFI44L	interferon-induced protein 44-like	10964	NA	1
7902553	3.8311	4.0471	4.83352	4.97733	IFI44	interferon-induced protein 44	10561	610468	1
7902563	5.44009	4.70475	4.62141	4.56323	---	---	NA	NA
7902565	4.12828	4.8939	5.95869	5.46628	LPHN2	latrophilin 2	23266	607018	1
7902592	6.10244	6.73276	6.26285	6.69771	ARID3B	AT rich interactive domain 3B (BRIGHT-like)	10620	612457	15
7902634	5.51167	6.86001	7.46845	7.15197	BXDC5	brix domain containing 5	80135	NA	1
7902687	5.71253	5.63312	5.72191	5.57174	CYR61	cysteine-rich, angiogenic inducer, 61	3491	602369	1
7902700	3.76985	3.42687	3.79473	3.31819	---	---	NA	NA
7902702	3.971	4.91498	7.13481	5.17119	CLCA2	chloride channel accessory 2	9635	604003	1
7902738	4.15941	3.7548	5.11685	3.8998	CLCA4	chloride channel accessory 4	22802	NA	1, 1
7902771	5.96522	7.13325	7.96633	7.38934	SH3GLB1	SH3-domain GRB2-like endophilin B1	51100	609287	1
7902789	4.32683	5.37185	5.92495	5.49441	HS2ST1	heparan sulfate 2-O-sulfotransferase 1	9653	604844	1, 1
7902808	3.71195	4.15278	4.49518	4.61474	LOC339524 /// HS2ST1	hypothetical LOC339524 /// heparan sulfate 2-O-sulfotransferase 1	NA	NA
7902810	4.97823	5.89166	6.09279	5.75774	LMO4	LIM domain only 4	8543	603129	1
7902822	5.27514	5.95046	7.2701	6.87351	PKN2	protein kinase N2	5586	602549	1
7902848	6.77461	7.02081	7.69186	7.83273	---	---	NA	NA
7902891	4.94601	5.74034	6.06181	6.02207	ZNF326	zinc finger protein 326	284695	NA	1, 1
7902934	4.60135	3.73409	3.51885	3.6008	BRDT	bromodomain, testis-specific	676	602144	1, 1
7902977	3.17045	3.98823	3.57449	3.95494	KIAA1107	KIAA1107	23285	NA	1
7902992	4.55253	5.12398	5.64345	5.32219	RPAP2	RNA polymerase II associated protein 2	79871	611476	1
7903010	5.77357	6.56438	7.09863	6.839	RPL5	ribosomal protein L5	6125	603634, 612561	1
7903022	3.31467	3.62661	4.34232	4.24329	SNORD21	small nucleolar RNA, C/D box 21	6083	603635	1
7903024	4.30396	3.32681	2.79669	3.32945	---	---	NA	NA
7903028	4.52129	3.96168	3.45084	3.8066	---	---	NA	NA
7903032	4.91309	5.51402	6.12599	5.97004	MTF2	metal response element binding transcription factor 2	22823	609882	1
7903049	3.83168	4.47923	4.74142	4.61127	CCDC18	coiled-coil domain containing 18	343099	NA	1
7903092	5.09559	7.11207	7.29598	7.4527	FNBP1L	formin binding protein 1-like	54874	608848	1
7903119	3.26049	5.43513	7.17008	6.12368	ABCD3	ATP-binding cassette, sub-family D (ALD), member 3	5825	170995	1, 1
7903162	3.53751	4.00014	4.30348	3.51819	TMEM56	transmembrane protein 56	148534	NA	1
7903171	4.86523	5.09542	5.44376	5.43546	RWDD3	RWD domain containing 3	25950	NA	1
7903183	5.46106	5.72943	5.98339	5.85936	---	---	NA	NA
7903188	3.82256	4.76293	5.2627	5.58279	PTBP2	polypyrimidine tract binding protein 2	58155	608449	1
7903203	4.78778	4.54861	5.22063	5.29632	SNX7	sorting nexin 7	51375	NA	1
7903227	5.91259	7.36331	7.9302	7.48264	PALMD	palmdelphin	54873	610182	1
7903239	3.61828	4.05816	4.81599	4.6292	AGL	amylo-1, 6-glucosidase, 4-alpha-glucanotransferase	178	232400, 610860	1, 1, 1, 1
7903281	4.03106	4.08229	4.93276	4.6915	SLC35A3	solute carrier family 35 (UDP-N-acetylglucosamine (UDP-GlcNAc) transporter), member A3	23443	605632	1
7903294	3.68545	4.44174	5.83621	4.86249	HIAT1	hippocampus abundant transcript 1	64645	NA	1
7903308	5.46803	5.99108	6.37067	6.44611	CCDC76	coiled-coil domain containing 76	54482	NA	1
7903321	4.90801	6.60268	7.81423	7.26236	RTCD1	RNA terminal phosphate cyclase domain 1	8634	611286	1
7903334	4.13456	4.54189	5.33555	4.7558	CDC14A	CDC14 cell division cycle 14 homolog A (S. cerevisiae)	8556	603504	1, 1, 1
7903369	4.85583	4.86321	5.42058	5.32842	SLC30A7	solute carrier family 30 (zinc transporter), member 7	148867	611149	1, 1
7903389	6.95839	6.98307	7.52622	7.49829	---	---	NA	NA
7903399	4.67368	3.89298	3.7027	3.82226	---	---	NA	NA
7903404	7.02974	8.50269	9.62391	9.55205	RNPC3	RNA-binding region (RNP1, RRM) containing 3	55599	NA	1
7903407	4.95597	5.71133	6.23924	6.72698	AMY2B	amylase, alpha 2B (pancreatic)	280	104660	1
7903414	4.09907	5.45227	6.95928	6.80744	AMY2A	amylase, alpha 2A (pancreatic)	279	104650	1
7903425	3.91025	4.87625	6.06694	5.93289	AMY1A	amylase, alpha 1A (salivary)	276	104700	1, 1, 1, 1, 1, 1
7903440	3.91025	4.87625	6.06694	5.93289	AMY1A	amylase, alpha 1A (salivary)	276	104700	1, 1, 1, 1, 1, 1
7903457	3.84001	4.04377	4.02581	4.01587	PRMT6	protein arginine methyltransferase 6	55170	608274	1
7903474	6.20247	6.69776	7.29743	6.87279	---	---	NA	NA
7903478	5.42671	4.81183	4.38792	4.80747	NBPF5	neuroblastoma breakpoint family, member 5	284610	NA
7903490	5.44412	4.77756	4.30218	4.75735	NBPF4	neuroblastoma breakpoint family, member 4	148545	NA	1
7903519	6.42801	6.61799	6.8377	6.96272	PRPF38B	PRP38 pre-mRNA processing factor 38 (yeast) domain containing B	55119	NA	1
7903541	4.64635	5.59742	7.57275	6.47505	STXBP3	syntaxin binding protein 3	6814	608339	1
7903565	4.5034	5.27127	6.60758	6.07214	GPSM2	G-protein signaling modulator 2 (AGS3-like, C. elegans)	29899	609245	1
7903582	8.71783	9.72871	10.6829	9.85504	RPL17	ribosomal protein L17	6139	603661	18
7903586	4.69584	5.11084	6.26206	5.56048	TMEM167B	transmembrane protein 167B	56900	NA	1, 1_random
7903592	4.70793	4.86625	4.98132	4.76454	KIAA1324	KIAA1324	57535	611298	1
7903619	5.71662	6.71697	7.31501	6.68713	SARS	seryl-tRNA synthetase	6301	607529	1
7903676	5.96905	5.64454	4.85179	5.18994	ATXN7L2	ataxin 7-like 2	127002	NA	1
7903703	5.84107	6.30088	7.70469	6.74576	GNAI3	guanine nucleotide binding protein (G protein), alpha inhibiting activity polypeptide 3	2773	139370	1
7903717	8.75243	7.95176	7.47951	8.2566	hsa-mir-197	hsa-mir-197	NA	NA
7903742	5.21074	6.48013	6.34667	6.38832	GSTM4	glutathione S-transferase mu 4	2948	138333	1, 1
7903753	5.99553	7.41044	7.43576	7.69169	GSTM2	glutathione S-transferase mu 2 (muscle)	2946	138380	1, 1
7903765	5.22686	5.46745	5.44317	5.90539	GSTM1	glutathione S-transferase mu 1	2944	138350	1
7903777	4.415	4.65802	4.98104	4.85769	GSTM5	glutathione S-transferase mu 5	2949	138385	1
7903803	5.0397	6.21784	6.70939	6.10181	AHCYL1	S-adenosylhomocysteine hydrolase-like 1	10768	607826	1
7903889	4.27073	3.51393	3.19632	3.52663	---	---	NA	NA
7903893	5.03513	4.8193	5.43485	5.09037	CD53	CD53 molecule	963	151525	1, 1
7903908	5.46905	6.0368	6.54979	6.59949	CEPT1	choline/ethanolamine phosphotransferase 1	10390	NA	1, 1
7903920	4.28947	3.69477	3.87611	3.75407	CHI3L2	chitinase 3-like 2	1117	601526	1, 1
7903970	5.1806	4.97846	4.9247	5.0945	---	---	NA	NA
7903972	4.07253	4.88842	5.42698	4.76095	ATP5F1	ATP synthase, H+ transporting, mitochondrial F0 complex, subunit B1	515	603270	1
7903980	5.97755	5.4876	6.07076	5.6661	C1orf162	chromosome 1 open reading frame 162	128346	NA	1
7903988	5.47097	5.99043	6.86862	6.41643	RAP1A	RAP1A, member of RAS oncogene family	5906	179520	1
7904018	6.40212	7.12374	8.00738	7.50167	CTTNBP2NL	CTTNBP2 N-terminal like	55917	NA	1
7904036	4.27085	4.79132	5.76248	5.24391	CAPZA1	capping protein (actin filament) muscle Z-line, alpha 1	829	601580	1
7904048	4.07226	4.38368	4.80935	4.49326	---	---	NA	NA
7904073	5.265	4.69769	4.14792	4.69148	FAM19A3	family with sequence similarity 19 (chemokine (C-C motif)-like), member A3	284467	NA	1
7904137	5.16298	5.82919	6.82884	6.18089	HIPK1	homeodomain interacting protein kinase 1	204851	608003	1, 1, 1, 1
7904164	4.87654	3.27148	3.22273	3.5518	---	---	NA	NA
7904166	4.49223	4.80683	5.35962	5.1866	---	---	NA	NA
7904254	6.78117	8.96492	9.32581	8.89346	ATP1A1	ATPase, Na+/K+ transporting, alpha 1 polypeptide	476	182310	1
7904293	5.78217	5.87722	5.87645	6.00115	PTGFRN	prostaglandin F2 receptor negative regulator	5738	601204	1
7904340	4.92014	5.6072	6.53566	6.04057	MAN1A2	mannosidase, alpha, class 1A, member 2	10905	604345	1
7904361	4.60162	4.65525	5.00337	4.56343	FAM46C	family with sequence similarity 46, member C	54855	NA	1
7904364	3.91594	4.15196	4.73309	4.57413	WDR3	WD repeat domain 3	10885	604737	1
7904396	4.09777	3.98842	4.96357	3.61873	HAO2	hydroxyacid oxidase 2 (long chain)	51179	605176	1
7904414	4.95833	4.31934	4.4293	4.15675	HSD3B1	hydroxy-delta-5-steroid dehydrogenase, 3 beta- and steroid delta-isomerase 1	3283	109715	1
7904429	4.24098	3.85862	3.98869	3.72493	LOC128102	3-beta-hydroxysteroid dehydrogenase, tissue-type heart	128102	NA
7904463	7.52217	6.85433	6.3378	6.6556	---	---	NA	NA
7904469	5.04416	6.24613	6.91862	6.42103	SRGAP2	SLIT-ROBO Rho GTPase activating protein 2	23380	606524	1, 1
7904478	4.94983	6.2278	6.52636	6.45796	LOC51152	melanoma antigen	51152	NA
7904482	5.43712	6.69337	7.60211	7.15396	SRGAP2	SLIT-ROBO Rho GTPase activating protein 2	23380	606524	1, 1
7904486	10.2682	10.7427	10.816	11.0408	NBPF16	neuroblastoma breakpoint family, member 16	728936	NA	1, 1
7904500	10.4335	10.994	11.1311	11.3272	NBPF15	neuroblastoma breakpoint family, member 15	284565	610414	1
7904506	10.604	11.0455	11.1145	11.3106	NBPF14	neuroblastoma breakpoint family, member 14	25832	NA	1
7904562	10.5326	10.9536	11.0168	11.2273	NBPF16	neuroblastoma breakpoint family, member 16	728936	NA	1, 1
7904569	10.8518	11.4167	11.2665	11.6307	NBPF14	neuroblastoma breakpoint family, member 14	25832	NA	1
7904574	7.83408	8.74706	8.92727	9.07995	NBPF16	neuroblastoma breakpoint family, member 16	728936	NA	1, 1
7904693	3.59136	3.79276	4.46091	4.51326	SCZD13	Schizophrenia, susceptibility to, 13	80100	612361
7904695	5.23019	6.29942	7.07977	6.36687	SEC22B	SEC22 vesicle trafficking protein homolog B (S. cerevisiae)	9554	604029	1
7904702	6.3116	7.32223	7.91805	7.58948	NOTCH2NL	Notch homolog 2 (Drosophila) N-terminal like	388677	NA	1
7904715	4.8723	4.56743	3.73375	4.14781	---	---	NA	NA
7904717	5.64263	4.86431	4.246	4.61309	HFE2	hemochromatosis type 2 (juvenile)	148738	602390, 608374	1
7904726	8.38655	9.6242	10.4309	10.167	TXNIP	thioredoxin interacting protein	10628	606599	1
7904751	4.9216	5.56945	6.60725	5.98858	RBM8A	RNA binding motif protein 8A	9939	605313	1
7904755	5.14645	5.96039	6.50337	6.1655	PEX11B	peroxisomal biogenesis factor 11 beta	8799	603867	1
7904796	4.85483	4.95581	5.3698	4.94986	ANKRD35	ankyrin repeat domain 35	148741	NA	1
7904830	4.03124	5.03363	5.37502	5.36026	RNF115	ring finger protein 115	27246	NA	1
7904843	3.95494	4.6804	5.86942	4.84358	PDZK1	PDZ domain containing 1	5174	603831	1
7904853	4.11973	5.50121	6.66782	6.31137	GPR89C	G protein-coupled receptor 89C	728932	NA	1, 1
7904863	7.19163	6.87728	5.93947	6.56836	---	---	NA	NA
7904874	10.5281	11.1029	11.0976	11.4169	NBPF16	neuroblastoma breakpoint family, member 16	728936	NA	1, 1
7904877	4.78422	4.38192	3.94685	3.92698	---	---	NA	NA
7904879	7.28187	6.90495	6.32588	6.71534	---	---	NA	NA
7904881	5.12945	6.30239	7.86048	6.84187	PDIA3P	protein disulfide isomerase family A, member 3 pseudogene	171423	NA	1
7904883	5.06512	5.41016	5.93243	5.87046	CHD1L	chromodomain helicase DNA binding protein 1-like	9557	NA	1
7904927	4.2744	3.64364	3.18875	3.44281	GJA8	gap junction protein, alpha 8, 50kDa	2703	116150, 116200, 600897	1
7904930	3.62916	5.01622	6.27738	5.72026	GPR89B	G protein-coupled receptor 89B	51463	NA	1
7904959	4.66328	4.77574	4.73392	4.54723	---	---	NA	NA
7904965	4.79728	5.1271	6.27909	5.71338	PDE4DIP	phosphodiesterase 4D interacting protein	9659	608117	1, 1, 1, 1, 1
7904974	8.32594	9.75059	9.87595	9.79094	C1orf152	chromosome 1 open reading frame 152	767846	608609	1
7904976	8.21992	8.95891	9.09527	9.29821	NBPF16	neuroblastoma breakpoint family, member 16	728936	NA	1, 1
7904999	8.09914	8.95133	9.11012	9.29337	NBPF16	neuroblastoma breakpoint family, member 16	728936	NA	1, 1
7905020	6.0121	5.36466	4.78502	5.1866	DRD5	dopamine receptor D5	1816	126453, 143465, 606798	4
7905028	6.22481	6.86559	6.79721	6.46003	LOC654342 /// LOC645166 /// LSP1	lymphocyte-specific protein 1 pseudogene /// lymphocyte-specific protein 1 pseudogene /// lymphocyte-specific protein 1	NA	NA
7905058	5.39636	4.9482	4.84873	5.46354	LOC388692 /// LOC644634	hypothetical LOC388692 /// similar to UPF0627 protein ENSP00000358171	NA	NA
7905077	4.28208	3.31151	2.96853	3.36175	---	---	NA	NA
7905079	4.88022	5.73199	5.97765	5.20839	HIST2H2AA3	histone cluster 2, H2aa3	8337	142720	1, 1
7905088	6.66015	7.60957	8.1287	7.47617	HIST2H2AC	histone cluster 2, H2ac	8338	602797	1
7905099	4.73345	5.73131	6.61815	6.37162	VPS45	vacuolar protein sorting 45 homolog (S. cerevisiae)	11311	610035	1
7905127	5.46548	4.75084	4.3474	4.75103	---	---	NA	NA
7905147	4.33955	4.98597	5.84682	5.63207	C1orf54	chromosome 1 open reading frame 54	79630	NA	1
7905154	5.01142	5.03574	5.37753	5.25029	C1orf51	chromosome 1 open reading frame 51	148523	NA	1
7905163	6.15397	7.73184	8.33944	7.7267	MRPS21	mitochondrial ribosomal protein S21	54460	611984	1
7905171	6.6401	7.34397	7.6506	7.69206	PRPF3	PRP3 pre-mRNA processing factor 3 homolog (S. cerevisiae)	9129	601414, 607301	1
7905185	5.19671	5.91956	6.48531	6.20474	RPRD2	regulation of nuclear pre-mRNA domain containing 2	23248	NA	1
7905220	6.01628	6.07138	6.85146	6.26812	ECM1	extracellular matrix protein 1	1893	247100, 602201	1
7905308	5.77679	6.35532	7.19728	6.44743	BNIPL	BCL2/adenovirus E1B 19kD interacting protein like	149428	611275	1
7905339	5.10192	6.28988	6.52233	6.33837	GABPB2	GA binding protein transcription factor, beta subunit 2	126626	NA	1
7905355	6.81322	7.54428	7.44935	7.52383	SCNM1	sodium channel modifier 1	79005	608095	1
7905365	4.48044	5.56129	6.09791	5.50387	PIP5K1A	phosphatidylinositol-4-phosphate 5-kinase, type I, alpha	8394	603275	1
7905395	7.18229	8.44472	8.97867	8.39895	PSMB4	proteasome (prosome, macropain) subunit, beta type, 4	5692	602177	1
7905406	5.45019	5.5517	5.20072	5.34919	CGN	cingulin	57530	609473	1
7905428	5.2124	5.85194	6.69238	5.93442	TUFT1	tuftelin 1	7286	600087	1
7905444	5.01549	5.85841	6.60172	6.0234	SNX27	sorting nexin family member 27	81609	611541	1
7905481	2.96659	3.49161	3.65363	3.57737	---	---	NA	NA
7905483	6.31134	5.73603	6.3334	5.67941	LCE5A	late cornified envelope 5A	254910	612619	1
7905486	4.63557	4.14026	4.5988	4.0273	CRCT1	cysteine-rich C-terminal 1	54544	NA	1
7905490	5.56834	4.95744	4.69142	4.74666	LCE3C	late cornified envelope 3C	353144	612615	1
7905496	5.48064	4.54915	5.95742	4.41262	C1orf46	chromosome 1 open reading frame 46	388699	NA
7905500	6.03469	5.35414	8.27756	5.15804	LCE2D	late cornified envelope 2D	353141	612612	1
7905503	6.95887	4.88014	8.50968	4.76931	LCE2C	late cornified envelope 2C	353140	612611	1
7905505	7.22662	6.65807	9.62634	6.80512	LCE2B	late cornified envelope 2B	26239	612610	1
7905507	8.04066	7.41413	9.6445	7.49222	LCE2A	late cornified envelope 2A	353139	612609	1
7905512	6.95691	6.49164	9.22685	5.9986	C1orf68	chromosome 1 open reading frame 68	100129271	NA	1
7905515	5.72083	5.06314	9.22806	5.38332	KPRP	keratinocyte proline-rich protein	448834	NA	1
7905525	6.53769	5.81734	9.09639	6.43231	LCE1B	late cornified envelope 1B	353132	612604	1
7905533	5.41129	4.96843	6.04307	4.5314	IVL	involucrin	3713	147360	1
7905536	6.82745	6.39745	8.73618	6.18621	SPRR4	small proline-rich protein 4	163778	NA	1
7905544	7.50793	7.6014	9.44125	7.52306	SPRR1A	small proline-rich protein 1A	6698	182265	1
7905553	7.52137	7.15452	9.22617	6.99408	SPRR1B	small proline-rich protein 1B (cornifin)	6699	182266	1
7905563	7.05873	6.52278	8.77692	6.36943	LOR	loricrin	4014	152445, 602036, 604117	1
7905571	6.61926	6.16468	5.58024	5.65926	S100A9	S100 calcium binding protein A9	6280	123886	1
7905576	5.47789	4.7843	4.63695	4.04918	S100A7A	S100 calcium binding protein A7A	338324	NA	1
7905581	5.25311	5.5211	4.8037	5.14331	S100A1	S100 calcium binding protein A1	6271	176940	1
7905589	5.41843	6.01352	6.32248	6.28865	C1orf77	chromosome 1 open reading frame 77	26097	NA	1
7905598	5.20365	5.17124	6.13791	5.556	SNAPIN	SNAP-associated protein	23557	607007	1
7905631	6.14473	6.5849	6.47749	6.83834	INTS3	integrator complex subunit 3	65123	611347	1
7905691	10.421	10.7329	11.0554	10.7033	RPS27	ribosomal protein S27	6232	603702	1
7905700	5.83931	7.1176	7.40832	7.1582	UBAP2L	ubiquitin associated protein 2-like	9898	NA	1, 1
7905733	4.26961	6.07301	6.28661	5.91014	HAX1	HCLS1 associated protein X-1	10456	605998, 610738	1
7905744	4.77914	3.79584	3.39889	3.63445	---	---	NA	NA
7905746	5.36332	4.33055	3.83704	4.25849	AQP10	aquaporin 10	89872	606578	1
7905817	7.16226	6.28575	5.78377	6.23677	CHRNB2	cholinergic receptor, nicotinic, beta 2 (neuronal)	1141	118507, 605375	1
7905848	5.91618	5.28081	4.79204	4.9927	LENEP	lens epithelial protein	55891	607377	1
7905927	5.89693	4.77212	4.49488	4.76153	---	---	NA	NA
7905938	5.57214	6.00349	6.18265	5.65651	RAG1AP1	recombination activating gene 1 activating protein 1	55974	NA	1
7905949	6.82958	5.63958	4.30794	5.3202	LOC648822	similar to hCG2040565	NA	NA
7905986	6.58715	7.34221	7.14359	6.99892	FDPS	farnesyl diphosphate synthase (farnesyl pyrophosphate synthetase, dimethylallyltranstransferase, geranyltranstransferase)	2224	134629	1, 1
7906015	4.18333	4.65701	5.56574	4.90211	---	---	NA	NA
7906041	5.54105	6.53187	7.0821	6.31274	DAP3	death associated protein 3	7818	602074	1, 1
7906056	5.81788	6.00295	5.80535	5.69789	MSTO2P	misato homolog 2 pseudogene	100129405	NA	1
7906072	5.79271	6.76729	6.45179	6.42047	ROBLD3	roadblock domain containing 3	28956	610389, 610798	1
7906079	5.4308	6.6508	7.55579	6.15683	RAB25	RAB25, member RAS oncogene family	57111	NA	1
7906140	6.27573	5.96619	5.25166	5.93052	BGLAP	bone gamma-carboxyglutamate (gla) protein	632	112260	1
7906175	4.69923	3.60526	3.14778	3.55931	---	---	NA	NA
7906185	5.57073	6.73394	6.47272	6.33155	APOA1BP	apolipoprotein A-I binding protein	128240	608862	1
7906197	5.67357	5.31666	4.70393	4.92636	HAPLN2	hyaluronan and proteoglycan link protein 2	60484	NA	1
7906284	5.62237	4.91923	4.57611	4.77886	C1orf92	chromosome 1 open reading frame 92	149499	NA	1
7906307	5.32818	5.85143	5.68593	5.91411	KIRREL	kin of IRRE like (Drosophila)	55243	607428	1
7906339	4.98331	5.23967	5.90402	5.38821	CD1A	CD1a molecule	909	188370	1
7906348	5.29393	5.12851	6.46241	6.33883	CD1C	CD1c molecule	911	188340	1
7906355	5.13865	4.6624	5.8373	5.09264	CD1E	CD1e molecule	913	188411	1
7906365	4.177	3.47587	3.02226	3.39914	OR10K1	olfactory receptor, family 10, subfamily K, member 1	391109	NA	1
7906372	4.37862	3.5449	3.20436	3.42206	OR10Z1	olfactory receptor, family 10, subfamily Z, member 1	128368	NA	1
7906377	4.41374	4.13776	4.99737	3.96996	MNDA	myeloid cell nuclear differentiation antigen	4332	159553	1
7906400	5.44813	6.23493	6.56088	6.60773	IFI16	interferon, gamma-inducible protein 16	3428	147586	1
7906433	5.39368	4.88866	5.01792	5.22097	---	---	NA	NA
7906458	4.38389	3.37207	3.40248	3.47048	APCS	amyloid P component, serum	325	104770	1
7906662	5.33749	6.2401	7.90537	6.42872	UFC1	ubiquitin-fold modifier conjugating enzyme 1	51506	610554	1
7906703	5.94251	6.7598	7.11091	6.83125	NDUFS2	NADH dehydrogenase (ubiquinone) Fe-S protein 2, 49kDa (NADH-coenzyme Q reductase)	4720	252010, 602985	1
7906720	4.20046	4.19261	5.66577	4.34723	FCER1G	Fc fragment of IgE, high affinity I, receptor for; gamma polypeptide	2207	147139	1
7906746	4.75635	4.3652	5.31694	4.69029	SDHC	succinate dehydrogenase complex, subunit C, integral membrane protein, 15kDa	6391	602413, 605373, 606864	1
7906767	5.78618	6.07042	6.53826	6.34132	FCGR2C	Fc fragment of IgG, low affinity IIc, receptor for (CD32)	9103	188030, 612169	1
7906775	6.50644	5.92776	5.43789	5.95993	HSPA6	heat shock 70kDa protein 6 (HSP70B')	3310	140555	1
7906786	5.24197	4.34528	3.89802	4.31207	FCRLA	Fc receptor-like A	84824	606891	1
7906819	5.28507	6.38294	7.1862	6.43746	ATF6	activating transcription factor 6	22926	605537	1
7906852	4.71594	6.2904	7.05815	6.20223	UHMK1	U2AF homology motif (UHM) kinase 1	127933	608849	1
7906878	5.2066	5.673	5.74145	5.70877	DDR2	discoidin domain receptor tyrosine kinase 2	4921	191311	1
7906900	4.37517	5.42107	6.44566	5.93631	DDR2	discoidin domain receptor tyrosine kinase 2	4921	191311	1
7906904	4.84834	5.35217	6.41167	5.86126	HSD17B7	hydroxysteroid (17-beta) dehydrogenase 7	51478	606756	1
7906948	3.93093	3.62377	3.81088	3.78458	---	---	NA	NA
7906954	6.20439	7.29404	7.39986	7.41635	PBX1	pre-B-cell leukemia homeobox 1	5087	176310	1
7906978	5.62819	8.07281	8.51006	7.66279	MGST3	microsomal glutathione S-transferase 3	4259	604564	1
7907008	5.54113	4.81808	4.46439	5.24209	---	---	NA	NA
7907010	4.94702	4.08079	4.57669	4.3147	---	---	NA	NA
7907049	5.31315	4.99099	5.00885	5.38644	---	---	NA	NA
7907092	5.30067	5.74423	6.16779	6.01214	MPZL1	myelin protein zero-like 1	9019	604376	1
7907104	5.62484	6.81415	7.46152	7.16031	IQWD1	IQ motif and WD repeats 1	55827	610494	1
7907124	5.25232	5.93303	6.61593	6.4192	TIPRL	TIP41, TOR signaling pathway regulator-like (S. cerevisiae)	261726	611807	1, 1
7907135	5.3785	5.95582	7.53482	6.45362	SFT2D2	SFT2 domain containing 2	375035	NA	1
7907160	4.36623	6.76214	7.91325	7.27088	ATP1B1	ATPase, Na+/K+ transporting, beta 1 polypeptide	481	145500, 182330	1
7907171	3.67958	4.61472	5.615	4.89661	BLZF1	basic leucine zipper nuclear factor 1	8548	608692	1
7907211	6.75791	6.21812	5.68838	6.25222	---	---	NA	NA
7907213	4.64822	5.05464	5.33079	5.64711	GORAB	golgin, RAB6-interacting	92344	231070, 607983	1
7907222	5.51759	6.77397	7.36961	7.18487	PRRX1	paired related homeobox 1	5396	167420	1
7907271	3.72725	4.42694	4.48224	4.09577	FMO2	flavin containing monooxygenase 2 (non-functional)	2327	603955	1
7907310	6.61192	7.38313	8.16857	7.72281	BAT2D1	BAT2 domain containing 1	23215	NA	1
7907349	4.09176	4.36171	4.91976	4.69943	---	---	NA	NA
7907368	6.23843	5.54987	5.31625	5.45799	---	---	NA	NA
7907404	4.48631	4.77793	5.30463	5.07093	C1orf9	chromosome 1 open reading frame 9	51430	NA	1, 1
7907439	4.65619	7.00104	8.09357	6.95352	PRDX6	peroxiredoxin 6	9588	602316	1
7907445	5.03116	5.50393	6.31027	5.83922	KLHL20	kelch-like 20 (Drosophila)	27252	NA	1
7907464	5.37593	4.69428	4.2897	4.33119	---	---	NA	NA
7907492	5.21833	5.72882	6.01363	5.98632	RABGAP1L	RAB GTPase activating protein 1-like	9910	609238	1, 1
7907611	4.64885	5.22556	6.00263	5.90415	RASAL2	RAS protein activator like 2	9462	606136	1, 1
7907655	7.33584	6.61375	6.62499	6.67718	---	---	NA	NA
7907657	3.83337	4.2256	5.11845	4.70299	RALGPS2	Ral GEF with PH domain and SH3 binding motif 2	55103	NA	1
7907702	4.22667	4.43018	6.60165	4.85494	SOAT1	sterol O-acyltransferase 1	6646	102642	1
7907769	5.09813	4.23228	3.93452	3.96857	FAM163A	family with sequence similarity 163, member A	148753	611727	1
7907773	5.18282	5.466	5.97904	5.70188	TOR1AIP1	torsin A interacting protein 1	26092	NA	1
7907788	3.56373	3.05655	3.54791	3.18559	---	---	NA	NA
7907790	5.03104	6.00444	6.84939	6.48043	CEP350	centrosomal protein 350kDa	9857	NA	1
7907861	4.61326	5.42668	5.77439	5.55098	XPR1	xenotropic and polytropic retrovirus receptor	9213	605237	1
7907893	3.67298	3.87539	4.91858	4.28308	MR1	major histocompatibility complex, class I-related	3140	600764	1
7907907	4.76633	3.80445	3.64129	3.95879	LOC100287948	gm140	NA	NA
7907962	5.77756	5.23264	4.60169	4.82236	---	---	NA	NA
7908003	4.28209	4.09466	4.55656	4.23004	NPL	N-acetylneuraminate pyruvate lyase (dihydrodipicolinate synthase)	80896	611412	1
7908022	5.44598	6.11031	6.53088	6.34502	DHX9	DEAH (Asp-Glu-Ala-His) box polypeptide 9	1660	603115	1
7908041	4.98217	6.37529	6.85794	6.73026	LAMC1	laminin, gamma 1 (formerly LAMB2)	3915	150290, 176780	1
7908097	5.08954	6.17603	6.73935	6.48517	SMG7	Smg-7 homolog, nonsense mediated mRNA decay factor (C. elegans)	9887	610964	1
7908125	5.83404	6.26794	6.7453	6.42857	RGL1	ral guanine nucleotide dissociation stimulator-like 1	23179	605667	1
7908155	4.52014	3.69799	3.18232	3.46722	---	---	NA	NA
7908159	5.69241	4.77444	3.96698	4.60786	---	---	NA	NA
7908161	7.40093	7.71104	8.22832	7.92916	C1orf21	chromosome 1 open reading frame 21	81563	NA	1
7908204	4.06643	4.28852	5.0364	5.19014	HMCN1	hemicentin 1	83872	603075, 608548	1
7908312	4.23055	4.90185	7.17102	4.60668	PRG4	proteoglycan 4	10216	208250, 604283	1
7908330	3.71974	4.94221	5.80697	5.63966	C1orf27	chromosome 1 open reading frame 27	54953	609335	1
7908347	3.66954	5.443	6.33918	6.36275	OCLM	oculomedin	10896	604301	1
7908407	10.2304	10.6167	10.8555	10.6837	RPS27A	ribosomal protein S27a	6233	191343	2, 2
7908409	5.05607	5.06558	5.64137	5.49195	RGS2	regulator of G-protein signaling 2, 24kDa	5997	600861	1
7908421	4.08102	5.31756	6.61057	5.95425	TROVE2	TROVE domain family, member 2	6738	600063	1, 1, 1
7908437	6.41791	7.50626	8.05621	7.78654	CDC73	cell division cycle 73, Paf1/RNA polymerase II complex component, homolog (S. cerevisiae)	79577	145000, 145001, 607393, 608266	1
7908459	5.82084	6.65297	9.0009	8.06092	CFH	complement factor H	3075	126700, 134370, 235400, 609814, 610698	1, 1
7908488	2.74216	2.81539	3.965	3.54113	CFHR1	complement factor H-related 1	3078	134371	1
7908492	4.69078	3.73369	3.61548	3.83307	CFHR4	complement factor H-related 4	10877	605337	1
7908543	2.83501	3.78655	4.50551	4.10254	NEK7	NIMA (never in mitosis gene a)-related kinase 7	140609	606848	1
7908553	4.19098	4.22685	5.21561	4.83231	PTPRC	protein tyrosine phosphatase, receptor type, C	5788	126200, 151460, 608971, 609532	1, 1
7908591	5.59242	4.9328	4.51424	4.6959	---	---	NA	NA
7908593	3.96987	2.78249	2.54457	2.72176	---	---	NA	NA
7908614	4.78263	5.9454	7.20197	6.59141	CAMSAP1L1	calmodulin regulated spectrin-associated protein 1-like 1	23271	NA	1
7908635	6.85846	7.30364	7.4761	7.41135	---	---	NA	NA
7908672	6.55664	6.5839	7.40093	6.40162	PKP1	plakophilin 1 (ectodermal dysplasia/skin fragility syndrome)	5317	601975, 604536	1
7908732	4.42671	5.36417	5.84729	5.54444	IPO9	importin 9	55705	NA	1
7908766	4.09654	6.30612	6.84935	5.91886	TIMM17A	translocase of inner mitochondrial membrane 17 homolog A (yeast)	10440	605057	1
7908841	5.54864	6.3539	6.22768	6.46763	PPP1R12B	protein phosphatase 1, regulatory (inhibitor) subunit 12B	4660	603768	1, 1
7908861	4.90988	5.77165	5.76554	6.60399	OCR1	ovarian cancer-related protein 1	100128298	NA
7908863	5.01685	4.42266	3.90316	4.28795	LOC641515	hypothetical protein LOC641515	NA	NA
7908867	5.12053	5.90725	6.17613	6.05152	TMEM183A	transmembrane protein 183A	92703	NA	1
7908924	6.06265	6.85119	6.58764	6.31806	PRELP	proline/arginine-rich end leucine-rich repeat protein	5549	601914	1
7908940	5.48026	7.09404	7.93526	7.45607	ATP2B4	ATPase, Ca++ transporting, plasma membrane 4	493	108732	1
7908978	4.52884	6.76483	7.56493	7.3659	ZC3H11A	zinc finger CCCH-type containing 11A	9877	NA	1
7908988	3.89013	4.63067	5.52792	4.67079	SNRPE	small nuclear ribonucleoprotein polypeptide E	6635	128260	1
7909011	6.0426	6.42833	7.34264	7.35515	MDM4	Mdm4 p53 binding protein homolog (mouse)	4194	602704	1
7909102	5.57253	5.76205	6.46434	6.28689	---	---	NA	NA
7909140	4.90566	4.75902	4.50847	5.23238	---	---	NA	NA
7909142	5.3583	6.99341	9.08264	8.08484	NUCKS1	nuclear casein kinase and cyclin-dependent kinase substrate 1	64710	611912	1
7909155	4.84031	3.95097	3.35237	3.89838	AVPR1B	arginine vasopressin receptor 1B	553	600264	1
7909175	4.29209	4.97423	6.04387	4.94932	SRGAP2	SLIT-ROBO Rho GTPase activating protein 2	23380	606524	1, 1
7909283	4.8167	4.78208	6.35122	4.83079	---	---	NA	NA
7909332	6.5044	6.74928	9.03633	7.56741	CD55	CD55 molecule, decay accelerating factor for complement (Cromer blood group)	1604	125240	1
7909400	5.97382	6.80001	7.8942	7.32262	CD46	CD46 molecule, complement regulatory protein	4179	120920, 235400	1
7909422	6.2633	6.5751	7.47922	7.27663	LOC642587	NPC-A-5	642587	NA	1
7909441	7.43539	7.63568	6.74389	7.55808	G0S2	G0/G1switch 2	50486	NA	1
7909446	4.17108	4.16949	5.03441	3.74389	HSD11B1	hydroxysteroid (11-beta) dehydrogenase 1	3290	600713, 604931	1, 1
7909503	5.66983	6.17898	6.02912	6.61223	SERTAD4	SERTA domain containing 4	56256	NA	1
7909529	5.20813	6.07997	6.81193	6.6613	RCOR3	REST corepressor 3	55758	NA	1, 1, 1
7909586	3.71318	4.34949	4.97613	4.71598	PPP2R5A	protein phosphatase 2, regulatory subunit B', alpha isoform	5525	601643	1
7909603	5.89587	7.59594	7.90681	7.36652	NENF	neuron derived neurotrophic factor	29937	611874	1
7909689	3.73242	4.15422	4.59324	4.32171	SMYD2	SET and MYND domain containing 2	56950	610663	1
7909730	4.57687	4.16085	4.88285	4.16841	KCNK2	potassium channel, subfamily K, member 2	3776	603219	1, 1
7909745	4.02335	4.95788	5.82626	5.46082	KCTD3	potassium channel tetramerisation domain containing 3	51133	NA	1
7909782	5.0006	5.6991	6.63251	5.81375	RRP15	ribosomal RNA processing 15 homolog (S. cerevisiae)	51018	611193	1
7909789	4.86113	4.63685	5.14364	5.15215	TGFB2	transforming growth factor, beta 2	7042	190220	1
7909801	3.05544	3.54342	4.23517	3.90719	LYPLAL1	lysophospholipase-like 1	127018	NA	1
7909815	4.95359	5.54193	6.58302	5.97459	IARS2	isoleucyl-tRNA synthetase 2, mitochondrial	55699	NA	1
7909862	5.95121	6.331	5.52655	6.16127	C1orf115	chromosome 1 open reading frame 115	79762	NA	1
7909877	4.77239	4.98027	4.57795	4.86693	MOSC1	MOCO sulphurase C-terminal domain containing 1	64757	NA	1
7909888	4.33584	3.74162	3.23	3.48675	---	---	NA	NA
7909896	6.21937	5.62004	4.98699	5.53515	---	---	NA	NA
7909898	4.60746	5.66545	6.18843	6.02857	MIA3	melanoma inhibitory activity family, member 3	375056	NA	1
7909931	3.91679	4.80921	5.81148	5.21229	C1orf58	chromosome 1 open reading frame 58	148362	NA	1
7909967	5.8102	7.18565	7.14178	7.22877	CAPN2	calpain 2, (m/II) large subunit	824	114230	1
7909990	4.23596	4.54091	5.00738	4.55522	LOC100287934	similar to hCG2042721	NA	NA
7909992	4.07298	4.29007	5.84725	4.69377	FBXO28	F-box protein 28	23219	609100	1
7910001	6.0043	6.51867	8.62039	6.97243	DEGS1	degenerative spermatocyte homolog 1, lipid desaturase (Drosophila)	8560	NA	1
7910014	2.85902	5.20913	7.37506	5.7874	CNIH4	cornichon homolog 4 (Drosophila)	29097	NA	1
7910099	5.09299	6.33913	6.94518	6.57789	SRP9	signal recognition particle 9kDa	6726	600707	1
7910111	5.27442	5.94636	5.96053	5.8209	EPHX1	epoxide hydrolase 1, microsomal (xenobiotic)	2052	132810, 189800	1, 1
7910124	8.19685	9.91789	10.6972	10.0094	H3F3A	H3 histone, family 3A	3020	601128	1
7910134	5.99239	5.24683	4.85038	5.15626	MIXL1	Mix1 homeobox-like 1 (Xenopus laevis)	83881	609852	1
7910140	4.02007	3.50968	3.21839	3.25093	---	---	NA	NA
7910217	5.15794	4.36394	3.96706	4.19901	WNT3A	wingless-type MMTV integration site family, member 3A	89780	606359	1
7910229	7.06636	7.87863	7.99567	7.44489	ARF1	ADP-ribosylation factor 1	375	103180	1, 1
7910241	6.73488	7.69821	7.31869	7.09913	GUK1	guanylate kinase 1	2987	139270	1
7910377	4.39381	3.91819	4.4457	4.2805	---	---	NA	NA
7910379	4.13391	3.33953	3.10054	3.23562	DUSP5P	dual specificity phosphatase 5 pseudogene	574029	NA	1
7910381	4.78121	4.27632	4.1334	4.21629	DUSP5P	dual specificity phosphatase 5 pseudogene	574029	NA	1
7910385	6.07212	6.54054	6.71216	6.49057	---	---	NA	NA
7910398	4.36045	4.94003	5.52484	4.81994	RAB4A	RAB4A, member RAS oncogene family	5867	179511	1
7910414	5.04586	4.55444	4.34759	4.62297	---	---	NA	NA
7910494	4.39827	5.59595	6.68171	5.70316	ARV1	ARV1 homolog (S. cerevisiae)	64801	611647	1
7910503	5.30154	4.84399	4.27082	4.61466	TRIM67	tripartite motif-containing 67	440730	610584	1
7910520	4.5598	5.66793	6.91159	6.15741	GNPAT	glyceronephosphate O-acyltransferase	8443	222765, 602744	1
7910550	4.49515	4.79557	5.22079	4.9189	TSNAX	translin-associated factor X	7257	602964	1
7910587	4.51184	3.84862	3.77349	3.66287	---	---	NA	NA
7910589	5.01073	4.38777	4.08192	4.11402	KIAA1383	KIAA1383	54627	NA	1
7910591	4.5039	5.62381	5.27089	5.00099	C1orf57	chromosome 1 open reading frame 57	84284	NA	1
7910630	5.43348	6.36588	6.45894	5.80031	C1orf31	chromosome 1 open reading frame 31	388753	NA	1
7910636	6.75426	6.32457	5.44245	5.84783	---	---	NA	NA
7910638	5.88759	5.28609	4.54057	4.92389	---	---	NA	NA
7910640	4.68064	5.50507	6.39516	5.77103	GGPS1	geranylgeranyl diphosphate synthase 1	9453	606982	1, 1
7910676	7.31495	6.73174	6.17974	6.43973	---	---	NA	NA
7910680	4.15309	5.06657	5.66926	5.0935	GPR137B	G protein-coupled receptor 137B	7107	604658	1
7910706	5.33965	6.04499	6.96197	6.37554	LGALS8	lectin, galactoside-binding, soluble, 8	3964	606099	1, 1, 1
7910752	5.07278	6.23833	6.63005	6.83736	MTR	5-methyltetrahydrofolate-homocysteine methyltransferase	4548	119530, 156570, 190685, 250940, 601634	1
7910790	7.23642	7.90387	7.89431	7.4938	---	---	NA	NA
7910899	7.18692	6.43661	5.70094	6.21954	---	---	NA	NA
7910901	8.04435	8.41103	7.97795	8.1031	LOC100130331	actin, gamma-like	NA	NA
7910913	5.83694	5.34905	4.7739	5.11428	---	---	NA	NA
7910948	4.52224	3.49551	2.44795	3.15082	---	---	NA	NA
7911045	4.14876	3.24944	3.31589	3.44313	LOC440742	hypothetical gene supported by AK124614	440742	NA
7911078	5.2173	5.66989	6.50098	5.92412	PPPDE1	PPPDE peptidase domain containing 1	51029	NA	1
7911092	5.42071	4.8495	4.3554	4.48295	---	---	NA	NA
7911108	5.17526	5.00491	4.81147	4.84296	---	---	NA	NA
7911136	3.17643	3.54823	3.70713	3.91377	---	---	NA	NA
7911155	5.13901	5.68149	6.62151	6.17692	SCCPDH	saccharopine dehydrogenase (putative)	51097	NA	1
7911176	5.82788	5.8727	6.01901	6.25822	---	---	NA	NA
7911197	4.06783	3.65503	3.02352	3.39386	OR2W5	olfactory receptor, family 2, subfamily W, member 5	441932	NA	1
7911229	5.85061	5.20542	4.72445	5.14287	OR2W3	olfactory receptor, family 2, subfamily W, member 3	343171	NA	1
7911231	5.85061	5.20542	4.72445	5.14287	OR2W3	olfactory receptor, family 2, subfamily W, member 3	343171	NA	1
7911241	4.84276	3.85759	3.62896	3.73224	OR2L8	olfactory receptor, family 2, subfamily L, member 8	391190	NA	1
7911258	5.13056	3.97299	3.75925	4.03315	OR2L3	olfactory receptor, family 2, subfamily L, member 3	391192	NA	1
7911263	5.30645	4.30854	4.359	4.36153	OR2M5	olfactory receptor, family 2, subfamily M, member 5	127059	NA	1
7911271	4.48768	3.64908	3.27085	3.47273	OR14C36	olfactory receptor, family 14, subfamily C, member 36	127066	NA	1
7911273	4.45988	3.56954	3.57142	3.63418	OR2T4	olfactory receptor, family 2, subfamily T, member 4	127074	NA	1
7911283	5.54936	4.86175	4.3017	4.68283	OR2T3	olfactory receptor, family 2, subfamily T, member 3	343173	NA	1
7911307	6.12315	7.09041	7.73583	7.33818	RPL23AP82	ribosomal protein L23a pseudogene 82	284942	NA	22, 22, 22, 22
7911329	6.84115	7.09263	7.27878	7.53574	C20orf69	chromosome 20 open reading frame 69	140849	NA
7911331	3.48986	2.96587	3.31412	3.51341	---	---	NA	NA
7911333	6.02496	7.06333	7.61789	7.23553	RPL23AP82	ribosomal protein L23a pseudogene 82	284942	NA	22, 22, 22, 22
7911335	10.0931	11.475	11.8004	11.3851	---	---	NA	NA
7911337	10.5336	10.8468	11.2859	10.5677	---	---	NA	NA
7911339	8.14885	9.64127	10.0882	9.34732	---	---	NA	NA
7911341	9.63768	10.7115	10.702	10.5824	---	---	NA	NA
7911343	12.0276	12.4361	11.6629	12.226	UIMC1	ubiquitin interaction motif containing 1	51720	609433	5
7911345	4.29789	3.71589	4.58314	3.82709	OR4F16	olfactory receptor, family 4, subfamily F, member 16	81399	NA	1, 1, 5
7911347	6.36156	6.80863	6.66626	7.05376	C20orf69	chromosome 20 open reading frame 69	140849	NA
7911351	6.95812	6.70483	5.88188	6.59054	NCRNA00115	non-protein coding RNA 115	79854	NA	1
7911376	7.20775	6.98221	6.18501	6.55655	HES4	hairy and enhancer of split 4 (Drosophila)	57801	608060	1, 1
7911435	6.71884	6.15122	5.47103	5.96231	FAM132A	family with sequence similarity 132, member A	388581	NA	1
7911506	7.03954	6.54706	5.78775	6.38676	DVL1	dishevelled, dsh homolog 1 (Drosophila)	1855	601365	1
7911559	5.79044	7.07997	7.17419	6.5963	MRPL20	mitochondrial ribosomal protein L20	55052	611833	1
7911566	4.51953	5.20726	5.51322	5.83174	---	---	NA	NA
7911578	7.21531	7.41668	6.66283	7.20833	CDC2L2	cell division cycle 2-like 2 (PITSLRE proteins)	728642	116951	1
7911619	5.92859	7.2902	7.27448	7.28723	GNB1	guanine nucleotide binding protein (G protein), beta polypeptide 1	2782	139380	1
7911657	6.35016	5.82448	5.20725	5.83074	hCG_1647286	hypothetical protein LOC728690	728690	NA
7911659	4.42717	3.71073	3.33539	3.49709	KIAA1751	KIAA1751	85452	NA	1
7911699	5.63739	5.22991	4.77077	4.98991	FLJ14100	hypothetical protein FLJ14100	80093	NA
7911754	6.69842	6.24377	5.6039	6.0185	TNFRSF14	tumor necrosis factor receptor superfamily, member 14 (herpesvirus entry mediator)	8764	602746	1
7911793	6.96813	6.81708	5.88548	6.62643	FLJ42875	hypothetical LOC440556	440556	NA	1, 1
7911854	6.06899	6.03327	5.1895	5.86848	KIAA0495	KIAA0495	57212	NA	1
7911870	5.60033	6.04287	5.96068	6.18329	KIAA0562	KIAA0562	9731	NA	1
7911989	4.19378	6.51445	7.72811	6.75364	RPL22	ribosomal protein L22	6146	180474	1
7912031	5.91533	5.27919	4.72184	5.06603	HES2	hairy and enhancer of split 2 (Drosophila)	54626	609970	1
7912056	6.18435	5.91428	5.01593	5.55956	PLEKHG5	pleckstrin homology domain containing, family G (with RhoGef domain) member 5	57449	611067, 611101	1, 1, 1, 1, 1
7912086	4.94241	4.88433	5.42305	5.4947	NOL9	nucleolar protein 9	79707	NA	1
7912112	6.21491	6.33303	6.04316	6.21298	DNAJC11	DnaJ (Hsp40) homolog, subfamily C, member 11	55735	NA	1
7912145	4.39734	3.69513	3.42872	3.48111	TNFRSF9	tumor necrosis factor receptor superfamily, member 9	3604	602250	1
7912155	7.35022	7.11355	6.5464	6.60902	---	---	NA	NA
7912157	4.81685	5.21876	5.76117	5.32802	ERRFI1	ERBB receptor feedback inhibitor 1	54206	608069	1
7912162	6.40212	5.88487	5.21352	5.66703	---	---	NA	NA
7912194	5.57711	5.4619	5.08748	5.31859	DKFZp566H0824	hypothetical LOC54744	NA	NA
7912198	5.36213	7.63875	8.12928	7.03258	ENO1	enolase 1, (alpha)	2023	172430	1
7912250	6.89859	6.54277	5.73438	6.31846	MIR34A	microRNA 34a	407040	611172
7912257	5.86324	6.51998	7.13671	7.06038	CLSTN1	calsyntenin 1	22883	611321	1
7912292	3.69405	4.87749	5.28271	4.76817	LZIC	leucine zipper and CTNNBIP1 domain containing	84328	610458	1
7912347	5.42184	6.22467	6.48653	6.18713	CASZ1	castor zinc finger 1	54897	609895	1, 1
7912349	6.29093	5.5864	4.74134	5.51102	C1orf127	chromosome 1 open reading frame 127	148345	NA	1
7912385	6.68342	7.46475	7.84872	7.67631	EXOSC10	exosome component 10	5394	605960	1
7912412	5.04312	5.96517	6.17918	5.74363	FRAP1	FK506 binding protein 12-rapamycin associated protein 1	2475	601231	1
7912527	4.74132	5.62075	5.59196	5.17185	---	---	NA	NA
7912529	5.14428	4.40047	4.30593	4.64342	---	---	NA	NA
7912535	4.87145	5.69432	7.00821	5.57552	---	---	NA	NA
7912552	5.14217	4.47299	4.19941	4.43287	HNRNPCL1	heterogeneous nuclear ribonucleoprotein C-like 1	343069	NA	1
7912580	5.19916	4.55698	3.84929	4.34318	LOC440563	heterogeneous nuclear ribonucleoprotein C-like	440563	NA	1
7912591	6.78081	5.83197	5.52521	5.92321	PRAMEF7	PRAME family member 7	441871	NA	1, 1
7912601	4.18314	3.49913	3.13097	3.41851	PRAMEF18	PRAME family member 18	391003	NA	1, 1
7912606	6.78081	5.83197	5.52521	5.92321	PRAMEF7	PRAME family member 7	441871	NA	1, 1
7912617	4.18314	3.49913	3.13097	3.41851	PRAMEF18	PRAME family member 18	391003	NA	1, 1
7912627	5.12107	4.35156	3.69403	3.98843	---	---	NA	NA
7912670	7.84344	9.16366	9.73225	8.97622	UQCRH	ubiquinol-cytochrome c reductase hinge protein	7388	NA	1
7912672	4.52356	4.21811	3.63036	3.88843	hCG_2008140	hypothetical LOC729614	729614	NA	1
7912701	6.2655	5.76972	5.47767	5.45239	FAM131C	family with sequence similarity 131, member C	348487	NA	1
7912750	4.42443	4.84665	5.48507	5.1796	FBXO42	F-box protein 42	54455	609109	1
7912762	4.39459	4.25563	4.76074	4.73503	---	---	NA	NA
7912800	7.46618	8.01708	6.43757	7.12228	RNU1A	RNA, U1A small nuclear	6060	180680
7912802	3.96972	3.91016	3.59971	4.12143	LOC440570	LOC440570	440570	NA
7912804	6.66226	6.00725	5.5238	5.95216	LOC440570	LOC440570	440570	NA
7912808	7.93534	8.65886	8.77199	9.00392	NBPF16	neuroblastoma breakpoint family, member 16	728936	NA	1, 1
7912850	7.46618	8.01708	6.43757	7.12228	RNU1A	RNA, U1A small nuclear	6060	180680
7912852	6.71877	7.71726	9.53626	8.54168	EIF1AP1	eukaryotic translation initiation factor 1A pseudogene 1	280661	NA
7912861	4.99726	4.36972	4.14289	4.70177	LOC644634	similar to UPF0627 protein ENSP00000358171	NA	NA
7912884	5.00857	4.31916	3.77627	4.08058	LOC440570	LOC440570	440570	NA
7912928	3.99555	5.59633	6.19342	5.27443	SDHB	succinate dehydrogenase complex, subunit B, iron sulfur (Ip)	6390	115310, 171300, 185470, 606864, 612359	1
7912994	5.10041	5.34057	6.20425	5.38921	IFFO2	intermediate filament family orphan 2	126917	NA	1
7913001	5.06448	6.0857	6.48858	6.3952	UBR4	ubiquitin protein ligase E3 component n-recognin 4	23352	609890	1
7913154	5.40853	4.96852	4.55414	4.88529	---	---	NA	NA
7913169	5.92368	7.13495	7.47498	6.94489	CAPZB	capping protein (actin filament) muscle Z-line, beta	832	601572	1
7913185	5.83746	5.42929	5.50391	5.9356	---	---	NA	NA
7913216	5.57884	6.90319	6.94593	5.87661	PLA2G2A	phospholipase A2, group IIA (platelets, synovial fluid)	5320	114500, 172411	1
7913235	6.47826	5.8511	5.37609	5.78179	PLA2G2C	phospholipase A2, group IIC	391013	NA	1
7913237	6.92503	7.8041	7.96006	8.0052	CAMK2N1	calcium/calmodulin-dependent protein kinase II inhibitor 1	55450	NA	1
7913256	5.43427	6.46258	6.52692	6.12453	DDOST	dolichyl-diphosphooligosaccharide-protein glycosyltransferase	1650	602202	1
7913271	5.16065	4.45739	4.24191	4.50277	KIF17	kinesin family member 17	NA	NA	NA
7913300	5.78949	7.03977	7.54657	7.40483	HP1BP3	heterochromatin protein 1, binding protein 3	50809	NA	1
7913319	5.76551	6.4439	7.10692	6.81381	EIF4G3	eukaryotic translation initiation factor 4 gamma, 3	8672	603929	1
7913357	5.69538	6.43704	6.13156	6.3842	ECE1	endothelin converting enzyme 1	1889	145500, 600423	1, 1, 1, 1
7913380	10.248	10.7711	10.7838	11.0748	NBPF3	neuroblastoma breakpoint family, member 3	NA	NA
7913385	4.7277	4.26767	3.48189	3.87427	RAP1GAP	RAP1 GTPase activating protein	5909	600278	1
7913415	3.95782	5.45591	6.25933	6.21604	USP48	ubiquitin specific peptidase 48	84196	NA	1, 1
7913566	4.93238	4.29431	3.83009	4.32511	HTR1D	5-hydroxytryptamine (serotonin) receptor 1D	3352	182133	1
7913571	6.19092	7.60232	8.2726	8.20759	HNRNPR	heterogeneous nuclear ribonucleoprotein R	10236	607201	1
7913593	6.4443	7.24659	7.06225	7.06903	TCEA3	transcription elongation factor A (SII), 3	6920	604128	1
7913642	5.15021	5.48712	5.73923	5.63585	---	---	NA	NA
7913665	7.75504	7.30318	6.24941	6.95912	---	---	NA	NA
7913712	4.58675	5.5097	5.92651	6.00049	FUSIP1	FUS interacting protein (serine/arginine-rich) 1	10772	605221	1, 1, 1_random, 1_random
7913768	5.37809	5.11138	6.13994	5.05956	IL22RA1	interleukin 22 receptor, alpha 1	58985	605457	1
7913814	5.20883	6.75919	7.78603	7.1866	SYF2	SYF2 homolog, RNA splicing factor (S. cerevisiae)	25949	607090	1
7913824	4.57901	5.3758	5.34051	5.66318	C1orf63	chromosome 1 open reading frame 63	57035	NA	1
7913858	5.2453	5.11361	5.98907	5.34676	PAQR7	progestin and adipoQ receptor family member VII	164091	607779	1
7914040	8.45192	8.0032	7.60497	7.95537	---	---	NA	NA
7914084	6.26094	5.68057	5.19736	5.61561	CD164L2	CD164 sialomucin-like 2	388611	NA	1
7914094	6.23425	6.40518	6.74529	6.52887	WASF2	WAS protein family, member 2	10163	605875	1
7914139	3.92894	5.45077	6.11276	5.56133	PPP1R8	protein phosphatase 1, regulatory (inhibitor) subunit 8	NA	NA
7914141	4.23278	5.01257	4.94253	4.87886	RPA2	replication protein A2, 32kDa	6118	179836	1
7914153	4.64551	5.19894	5.9751	5.45966	EYA3	eyes absent homolog 3 (Drosophila)	2140	601655	1
7914178	5.85496	5.51924	4.88038	5.32023	---	---	NA	NA
7914180	3.97485	5.90372	7.52557	5.99232	SPCS2	signal peptidase complex subunit 2 homolog (S. cerevisiae)	9789	NA	11
7914194	5.23093	6.19256	6.18949	6.22988	DNAJC8	DnaJ (Hsp40) homolog, subfamily C, member 8	22826	NA	1
7914200	5.19795	3.67941	3.50455	3.74008	---	---	NA	NA
7914202	7.10838	7.23278	7.3796	7.50756	SNHG12	small nucleolar RNA host gene 12 (non-protein coding)	85028	NA	1
7914212	5.10983	6.21043	7.49858	7.20118	SNORA61	small nucleolar RNA, H/ACA box 61	677838	NA	1
7914218	4.4954	5.34019	5.86366	5.36891	TAF12	TAF12 RNA polymerase II, TATA box binding protein (TBP)-associated factor, 20kDa	6883	600773	1
7914245	5.36039	5.70957	5.48005	5.29004	MECR	mitochondrial trans-2-enoyl-CoA reductase	51102	608205	1
7914270	5.25674	5.61889	6.12268	5.71962	LAPTM5	lysosomal multispanning membrane protein 5	7805	601476	1
7914296	5.62153	6.83368	7.55309	7.07525	PUM1	pumilio homolog 1 (Drosophila)	9698	607204	1
7914334	4.6663	4.73491	5.36353	4.70976	SNRNP40	small nuclear ribonucleoprotein 40kDa (U5)	9410	607797	1
7914342	4.18366	4.85982	4.91625	4.95141	FABP3	fatty acid binding protein 3, muscle and heart (mammary-derived growth inhibitor)	2170	134651	1
7914467	6.03544	5.42053	4.94613	5.35613	SPOCD1	SPOC domain containing 1	90853	NA	1
7914489	8.06737	8.09267	8.54079	8.40627	PTP4A2	protein tyrosine phosphatase type IVA, member 2	8073	601584	1
7914550	4.57273	4.84953	5.48127	4.97073	ZBTB8OS	zinc finger and BTB domain containing 8 opposite strand	339487	NA	1
7914555	5.34988	5.45615	6.07441	5.758	---	---	NA	NA
7914563	5.04545	5.75211	5.91425	5.43755	YARS	tyrosyl-tRNA synthetase	8565	603623, 608323	1
7914617	5.69898	6.36856	6.32689	6.14302	AK2	adenylate kinase 2	204	103020	1, 1
7914758	5.08787	4.67578	4.12097	4.74533	DLGAP3	discs, large (Drosophila) homolog-associated protein 3	58512	611413	1
7914764	5.02872	5.29573	5.88269	5.82172	ZMYM6	zinc finger, MYM-type 6	9204	NA	1
7914809	5.13021	5.59242	6.2519	5.87918	KIAA0319L	KIAA0319-like	79932	NA	1, 1
7914834	6.23754	7.21825	7.78298	7.13893	PSMB2	proteasome (prosome, macropain) subunit, beta type, 2	5690	602175	1
7914851	4.69549	4.08573	3.58636	4.09327	CLSPN	claspin homolog (Xenopus laevis)	63967	605434	1
7914887	4.88173	6.33037	6.88262	6.12528	TRAPPC3	trafficking protein particle complex 3	27095	610955	1
7914898	7.06142	6.5813	5.82192	6.37238	FAM176B	family with sequence similarity 176, member B	55194	NA	1
7914938	5.18638	4.17492	3.38485	3.92032	---	---	NA	NA
7914940	5.05693	6.08984	6.38216	5.86209	MRPS15	mitochondrial ribosomal protein S15	64960	611979	1
7914992	4.79788	4.03994	3.99838	3.84478	---	---	NA	NA
7914996	4.59273	5.36953	5.80468	5.38742	C1orf149	chromosome 1 open reading frame 149	64769	611001	1
7915015	5.51525	5.94009	6.38812	6.01647	GNL2	guanine nucleotide binding protein-like 2 (nucleolar)	29889	609365	1
7915091	4.88195	5.54308	6.16363	5.56117	MTF1	metal-regulatory transcription factor 1	4520	600172	1
7915130	4.77093	6.09908	6.82535	6.41694	SF3A3	splicing factor 3a, subunit 3, 60kDa	10946	605596	1
7915160	3.95852	5.52379	6.23864	5.36553	RRAGC	Ras-related GTP binding C	64121	608267	1
7915184	4.05975	4.41262	5.72453	4.62895	RHBDL2	rhomboid, veinlet-like 2 (Drosophila)	54933	608962	1
7915198	4.69741	3.71726	3.29378	3.64446	---	---	NA	NA
7915238	5.61169	4.73497	4.03466	4.50413	NT5C1A	5'-nucleotidase, cytosolic IA	84618	610525	1
7915252	6.4734	5.93319	5.21634	5.88131	BMP8B	bone morphogenetic protein 8b	656	602284	1
7915275	3.26216	3.34827	3.61934	4.77991	---	---	NA	NA
7915277	5.35186	4.96927	4.61818	4.70614	MYCL1	v-myc myelocytomatosis viral oncogene homolog 1, lung carcinoma derived (avian)	4610	164850	1, 1
7915284	5.52558	4.9817	4.71136	5.06378	---	---	NA	NA
7915286	4.09657	5.04966	5.79841	5.05309	PPT1	palmitoyl-protein thioesterase 1	5538	256730, 600722	1
7915331	4.39081	4.19502	3.37633	3.71082	---	---	NA	NA
7915345	6.81166	6.22692	5.43526	6.09206	LOC100130557	hypothetical LOC100130557	100130557	NA	1
7915347	5.63963	5.33601	4.66169	4.82994	CITED4	Cbp/p300-interacting transactivator, with Glu/Asp-rich carboxy-terminal domain, 4	163732	606815	1
7915363	4.01941	5.04364	4.98398	4.86705	SCMH1	sex comb on midleg homolog 1 (Drosophila)	22955	NA	1, 1
7915385	5.58156	4.87482	4.41013	4.82104	EDN2	endothelin 2	1907	131241	1
7915404	6.31763	5.66534	5.16423	5.58408	GUCA2A	guanylate cyclase activator 2A (guanylin)	2980	139392	1
7915472	5.91954	6.03842	6.96302	5.76761	SLC2A1	solute carrier family 2 (facilitated glucose transporter), member 1	6513	138140, 606777, 612126	1
7915485	5.38674	6.29161	6.9877	6.34658	EBNA1BP2	EBNA1 binding protein 2	10969	NA	1
7915504	5.75008	5.90166	7.00518	5.66714	ELOVL1	elongation of very long chain fatty acids (FEN1/Elo2, SUR4/Elo3, yeast)-like 1	64834	611813	1
7915516	3.85236	4.27647	4.94446	4.10823	MED8	mediator complex subunit 8	112950	607956	1, 1
7915563	4.86812	5.18003	5.54637	5.02576	---	---	NA	NA
7915594	6.42808	6.91091	7.6117	6.93513	---	---	NA	NA
7915640	4.31397	5.22897	5.94363	5.52245	EIF2B3	eukaryotic translation initiation factor 2B, subunit 3 gamma, 58kDa	8891	603896, 606273	1
7915657	4.12651	3.31958	3.29476	3.44604	---	---	NA	NA
7915733	6.13161	7.64103	8.13233	7.31042	PRDX1	peroxiredoxin 1	5052	176763	1
7915758	4.69435	6.43672	7.45454	6.62199	GPBP1L1	GC-rich promoter binding protein 1-like 1	60313	NA	1
7915775	3.97897	4.42445	5.70325	4.74298	IPP	intracisternal A particle-promoted polypeptide	3652	147485	1, 1
7915787	4.8124	6.06526	5.81653	5.83253	PIK3R3	phosphoinositide-3-kinase, regulatory subunit 3 (gamma)	8503	606076	1, 1
7915841	6.97311	6.25705	5.81019	6.17633	KNCN	kinocilin	148930	611455	1
7915870	4.99729	6.04275	6.13447	6.17985	ATPAF1	ATP synthase mitochondrial F1 complex assembly factor 1	64756	608917	1
7915882	4.99394	5.89664	6.92541	6.34695	KIAA0494	KIAA0494	9813	NA	1
7915896	3.72666	4.02983	4.40205	3.88031	CYP4Z2P	cytochrome P450, family 4, subfamily Z, polypeptide 2 pseudogene	163720	NA	1
7915902	3.58796	4.33994	4.25086	3.89104	CYP4A11	cytochrome P450, family 4, subfamily A, polypeptide 11	1579	601310	1
7915955	4.77575	5.78604	6.22419	6.3008	SPATA6	spermatogenesis associated 6	54558	NA	1
7915995	4.91974	5.81329	5.84008	5.74103	FAF1	Fas (TNFRSF6) associated factor 1	11124	604460	1
7916016	5.23342	5.38746	5.6951	5.31313	---	---	NA	NA
7916045	5.25921	6.6569	7.45067	7.13671	EPS15	epidermal growth factor receptor pathway substrate 15	2060	600051	1
7916075	3.5002	3.57236	3.80181	3.48958	---	---	NA	NA
7916077	5.57585	6.65549	7.90822	7.17239	NRD1	nardilysin (N-arginine dibasic convertase)	4898	602651	1
7916185	5.42459	5.96124	6.60108	6.52168	ZCCHC11	zinc finger, CCHC domain containing 11	23318	NA	1
7916219	4.24692	4.12285	4.88436	3.94701	C1orf163	chromosome 1 open reading frame 163	65260	NA	1
7916225	5.39529	5.21177	5.09425	5.27233	---	---	NA	NA
7916246	4.10423	4.52835	5.03474	5.42273	---	---	NA	NA
7916248	5.06546	4.2769	3.79107	4.15496	SLC1A7	solute carrier family 1 (glutamate transporter), member 7	6512	604471	1
7916262	5.54312	7.5396	7.97108	7.77681	C1orf123	chromosome 1 open reading frame 123	54987	NA	1
7916274	5.03223	6.10945	6.40747	6.03639	MAGOH	mago-nashi homolog, proliferation-associated (Drosophila)	4116	602603	1
7916316	4.08768	4.15189	4.6234	4.4233	TMEM48	transmembrane protein 48	55706	610115	1
7916356	4.57222	5.46904	6.11949	5.73295	HSPB11	heat shock protein family B (small), member 11	51668	NA	1
7916372	6.03277	7.04912	8.3346	7.29315	TMEM59	transmembrane protein 59	9528	NA	1
7916393	4.32451	3.82862	3.76346	3.91988	CYB5RL	cytochrome b5 reductase-like	NA	NA	NA
7916403	5.17578	5.88044	6.1673	5.99614	SSBP3	single stranded DNA binding protein 3	23648	607390	1, 1
7916432	5.67072	6.87802	7.7619	6.39563	DHCR24	24-dehydrocholesterol reductase	1718	602398, 606418	1
7916443	4.27734	5.27308	5.81726	5.68014	USP24	ubiquitin specific peptidase 24	23358	610569	1
7916562	8.85499	9.26372	9.59305	9.63062	HNRPA1L-2	heterogeneous nuclear ribonucleoprotein A1 pseudogene	664709	NA	12
7916564	6.11835	6.61997	6.85335	6.5005	hCG_2033311	ribosomal protein S26 pseudogene 15	644928	NA	1
7916568	5.70457	5.10674	4.1802	4.83425	DAB1	disabled homolog 1 (Drosophila)	1600	603448	1
7916570	4.07433	4.38652	4.99409	4.79599	OMA1	OMA1 homolog, zinc metallopeptidase (S. cerevisiae)	115209	NA	1
7916582	6.04933	5.20998	4.74283	5.15906	---	---	NA	NA
7916584	6.61131	6.48817	7.23005	6.21929	TACSTD2	tumor-associated calcium signal transducer 2	4070	137290, 204870	1
7916590	8.94824	9.66081	9.3038	9.35246	AK2	adenylate kinase 2	204	103020	1, 1
7916592	5.14167	6.47389	7.27289	7.10698	MYSM1	Myb-like, SWIRM and MPN domains 1	114803	612176	1
7916669	4.34825	5.05668	5.6803	5.55832	DOCK7	dedicator of cytokinesis 7	85440	NA	1
7916725	4.16196	3.59251	3.26497	3.80722	---	---	NA	NA
7916727	3.9124	4.08905	5.16338	4.69627	ITGB3BP	integrin beta 3 binding protein (beta3-endonexin)	23421	605494	1
7916747	4.90723	6.66539	7.64363	6.78815	JAK1	Janus kinase 1 (a protein tyrosine kinase)	3716	147795	1
7916808	4.72424	5.1493	5.66895	5.60394	SLC35D1	solute carrier family 35 (UDP-glucuronic acid/UDP-N-acetylgalactosamine dual transporter), member D1	23169	610804	1
7916836	4.61737	5.48129	6.37079	5.94079	SERBP1	SERPINE1 mRNA binding protein 1	26135	607378	1
7916843	5.48711	7.0615	8.47209	7.23817	GNG12	guanine nucleotide binding protein (G protein), gamma 12	55970	NA	1
7916862	5.24427	6.78186	7.60187	6.96476	GPR177	G protein-coupled receptor 177	79971	611514	1, 1
7916910	3.00806	3.12285	3.99557	3.60618	LRRC40	leucine rich repeat containing 40	55631	NA	1
7916969	8.07841	8.89198	8.91972	9.0889	ZRANB2	zinc finger, RAN-binding domain containing 2	9406	604347	1
7917037	3.75539	4.72525	5.77288	4.95209	CRYZ	crystallin, zeta (quinone reductase)	1429	123691	1, 1
7917050	4.96412	4.51203	4.5228	4.65892	---	---	NA	NA
7917052	3.21937	3.00005	4.42261	3.09795	SLC44A5	solute carrier family 44, member 5	204962	NA	1, 1
7917088	3.10419	3.04007	4.28523	3.57279	PIGK	phosphatidylinositol glycan anchor biosynthesis, class K	10026	605087	1
7917103	4.71561	5.16035	5.92111	5.76176	ZZZ3	zinc finger, ZZ-type containing 3	26009	NA	1
7917120	4.31713	5.27354	6.14588	5.85326	USP33	ubiquitin specific peptidase 33	23032	NA	1, 1
7917148	4.91752	5.47198	6.51777	5.8869	AIDA	axin interactor, dorsalization associated	64853	612375	1
7917156	7.50576	8.02346	8.39101	8.63069	FUBP1	far upstream element (FUSE) binding protein 1	8880	603444	1
7917180	3.39316	3.0303	3.5215	3.84531	---	---	NA	NA
7917182	3.42067	4.6298	4.78174	5.25297	ELTD1	EGF, latrophilin and seven transmembrane domain containing 1	64123	NA	1
7917199	3.86739	4.46996	4.60306	4.7933	TTLL7	tubulin tyrosine ligase-like family, member 7	79739	NA	1
7917240	4.46	4.56843	5.74943	4.86475	CTBS	chitobiase, di-N-acetyl-	1486	600873	1
7917276	4.8654	4.32894	5.12742	4.37834	LPAR3	lysophosphatidic acid receptor 3	23566	605106	1
7917347	4.91675	5.97915	6.22587	5.99296	DDAH1	dimethylarginine dimethylaminohydrolase 1	23576	604743	1, 1
7917359	5.17619	5.98571	7.49415	6.80328	ZNHIT6	zinc finger, HIT type 6	54680	NA	1
7917431	4.12439	3.4805	3.61898	4.40158	---	---	NA	NA
7917433	4.30499	5.17126	5.21495	5.28108	ODF2L	outer dense fiber of sperm tails 2-like	57489	NA	1
7917455	4.45614	6.32631	7.54463	6.71054	2012-09-15	15 kDa selenoprotein	9403	606254	1
7917466	4.99188	4.59473	4.288	4.51217	LOC339524	hypothetical LOC339524	339524	NA	1, 1, 1
7917468	5.54123	5.04979	5.42092	5.13466	---	---	NA	NA
7917472	4.40991	5.11499	6.64638	5.61944	GTF2B	general transcription factor IIB	2959	189963	1
7917482	3.98936	4.76545	6.1474	5.33055	CCBL2	cysteine conjugate-beta lyase 2	56267	610656	1, 1
7917516	5.23206	6.03984	6.39984	6.41956	GBP1	guanylate binding protein 1, interferon-inducible, 67kDa	2633	600411	1
7917530	4.41323	5.75526	6.21585	5.95405	---	---	NA	NA
7917532	5.11248	5.68041	5.90264	5.89439	GBP2	guanylate binding protein 2, interferon-inducible	2634	600412	1
7917591	6.76181	6.33475	5.98339	6.7314	---	---	NA	NA
7917604	3.29903	4.64612	5.82657	5.4402	ZNF644	zinc finger protein 644	84146	NA	1, 1
7917649	4.42759	5.62311	5.93546	5.79674	TGFBR3	transforming growth factor, beta receptor III	7049	600742	1
7917674	5.48016	6.30386	6.37675	6.52354	SET	SET nuclear oncogene	6418	600960	9, 9
7917697	5.5934	4.82774	4.30124	4.67506	GFI1	growth factor independent 1 transcription repressor	2672	202700, 600871, 607847	1, 1, 1
7917707	4.20616	4.60273	5.74415	5.24072	EVI5	ecotropic viral integration site 5	7813	602942	1
7917737	6.75648	6.27225	5.76315	6.27762	---	---	NA	NA
7917752	5.47034	5.22813	5.32758	5.69311	---	---	NA	NA
7917771	5.55979	6.39542	7.53648	6.59932	DNTTIP2	deoxynucleotidyltransferase, terminal, interacting protein 2	30836	611199	1
7917790	5.70466	5.579	4.91535	5.14133	---	---	NA	NA
7917792	4.53399	3.54225	3.33934	3.61122	---	---	NA	NA
7917850	3.42824	4.60747	5.72689	5.27318	ARHGAP29	Rho GTPase activating protein 29	9411	610496	1
7917875	5.29167	5.19208	6.07432	5.09089	F3	coagulation factor III (thromboplastin, tissue factor)	2152	134390	1
7917885	6.05314	6.79971	7.30585	7.04723	CNN3	calponin 3, acidic	1266	602374	1
7917902	4.22838	3.56039	3.23976	3.15777	---	---	NA	NA
7917906	9.29297	9.71819	10.2842	9.88809	RPL7	ribosomal protein L7	6129	604166	8
7917910	4.5078	3.90653	3.2689	3.6525	---	---	NA	NA
7917912	4.20123	4.7395	5.25069	5.23216	DPYD	dihydropyrimidine dehydrogenase	1806	274270	1
7917942	4.89076	3.80349	3.51064	3.80873	FLJ35409	FLJ35409 protein	400765	NA
7917944	3.99132	3.24577	3.14357	3.35208	hsa-mir-137 /// AK094607	hsa-mir-137 /// AK094607	NA	NA
7917954	4.60862	5.27692	6.51797	5.76736	FRRS1	ferric-chelate reductase 1	391059	611578	1
7917974	3.79865	3.69283	4.81852	4.0208	---	---	NA	NA
7918008	4.25354	4.53466	5.84743	4.95096	DBT	dihydrolipoamide branched chain transacylase E2	1629	248600, 248610	1
7918034	4.50538	5.05272	5.27793	5.07117	DPH5	DPH5 homolog (S. cerevisiae)	51611	611075	1
7918048	3.29234	3.4197	3.19543	3.58365	---	---	NA	NA
7918050	8.2209	8.99882	9.2272	8.96807	RPSA	ribosomal protein SA	3921	150370	3, 3
7918134	3.91025	4.87625	6.06694	5.93289	AMY1A	amylase, alpha 1A (salivary)	276	104700	1, 1, 1, 1, 1, 1
7918149	4.94484	4.21548	3.82014	4.07998	---	---	NA	NA
7918153	7.7466	7.43995	6.67044	7.06834	---	---	NA	NA
7918157	4.38259	4.65287	5.42678	5.02215	VAV3	vav 3 guanine nucleotide exchange factor	10451	605541	1, 1
7918203	5.579	4.8354	4.40766	4.85017	NBPF22P	neuroblastoma breakpoint family, member 22 (pseudogene)	285622	NA	5
7918255	5.23211	5.92945	6.68126	6.3399	CLCC1	chloride channel CLIC-like 1	23155	NA	1
7918275	3.87702	4.32692	5.44069	4.89198	WDR47	WD repeat domain 47	22911	NA	1
7918284	5.37137	6.97255	8.36001	7.27422	TAF13	TAF13 RNA polymerase II, TATA box binding protein (TBP)-associated factor, 18kDa	6884	600774	1
7918313	4.63431	3.99061	3.50195	3.89498	MYBPHL	myosin binding protein H-like	343263	NA	1
7918323	4.81136	5.44493	5.95788	5.53276	SORT1	sortilin 1	6272	602458	1
7918345	3.99937	5.46377	7.10376	5.31364	PSMA5	proteasome (prosome, macropain) subunit, alpha type, 5	5686	176844	1
7918365	7.01153	6.45403	6.2981	6.22623	---	---	NA	NA
7918379	3.39231	3.99555	4.99615	4.39218	GSTM3	glutathione S-transferase mu 3 (brain)	2947	138390	1
7918416	5.85048	5.21217	4.8455	4.97573	ALX3	ALX homeobox 3	NA	NA	NA
7918424	4.23864	4.16836	4.74613	4.24483	---	---	NA	NA
7918437	4.61357	5.91356	6.59715	5.73705	HBXIP	hepatitis B virus x interacting protein	10542	608521	1
7918467	3.61563	3.88499	4.53852	3.94901	C1orf103	chromosome 1 open reading frame 103	55791	NA	1
7918474	3.97747	5.1688	5.81946	5.47351	TMEM77	transmembrane protein 77	128338	NA	1
7918533	5.0862	4.14154	3.97739	4.21644	ADORA3	adenosine A3 receptor	140	600445	1, 1, 1
7918550	4.73438	4.74026	5.43122	4.79155	---	---	NA	NA
7918620	5.69875	5.08116	4.28336	4.7153	FLJ36116	hypothetical locus LOC388666	388666	NA
7918703	4.41064	4.93934	5.27697	5.38677	AP4B1	adaptor-related protein complex 4, beta 1 subunit	10717	607245	1
7918725	6.4687	7.22902	7.79972	7.56007	TRIM33	tripartite motif-containing 33	51592	188550, 605769	1
7918755	6.14985	5.13243	4.95275	4.93307	DENND2C	DENN/MADD domain containing 2C	163259	NA	1
7918757	4.95654	4.37029	3.96101	4.58477	DENND2C	DENN/MADD domain containing 2C	163259	NA	1
7918759	5.83114	6.52351	7.26998	6.5522	BCAS2	breast carcinoma amplified sequence 2	10286	605783	1
7918768	4.22985	4.09043	5.55834	4.27838	DENND2C	DENN/MADD domain containing 2C	163259	NA	1
7918813	5.26173	5.67669	7.0561	6.16138	NRAS	neuroblastoma RAS viral (v-ras) oncogene homolog	4893	114500, 164790, 188470	1
7918825	7.21594	8.35152	9.47809	8.79951	CSDE1	cold shock domain containing E1, RNA-binding	7812	191510	1, 1, 1
7918847	4.7078	4.869	5.50864	4.73295	RP5-1000E10.4	suppressor of IKK epsilon	80143	611656	1
7918876	5.5993	4.75543	4.31191	4.77002	---	---	NA	NA
7918878	3.95422	4.73521	4.889	4.87175	CASQ2	calsequestrin 2 (cardiac muscle)	845	114251, 604772, 611938	1
7918900	6.58141	6.75583	6.67063	7.31031	---	---	NA	NA
7918902	3.68553	4.32503	4.93651	4.58846	CD58	CD58 molecule	965	153420	1, 1
7918911	5.76546	5.81534	5.73778	5.99261	---	---	NA	NA
7918923	3.99997	4.09806	4.04458	3.61783	---	---	NA	NA
7918955	4.26395	4.70896	5.73428	5.3504	GDAP2	ganglioside induced differentiation associated protein 2	54834	NA	1, 1
7919038	4.3623	4.07928	4.60239	4.33047	WARS2	tryptophanyl tRNA synthetase 2, mitochondrial	10352	604733	1
7919049	5.14239	4.46683	4.28918	4.23166	---	---	NA	NA
7919095	4.66584	5.7531	6.78817	5.78148	NOTCH2	Notch homolog 2 (Drosophila)	4853	600275, 610205	1
7919131	4.67986	4.59696	5.23723	4.95243	---	---	NA	NA
7919139	3.65124	3.9066	4.35158	4.5042	LOC375010	ankyrin repeat domain 20 family, member A pseudogene	375010	NA
7919146	3.76568	4.07684	4.67397	4.82636	ANKRD20B /// LOC375010	ankyrin repeat domain 20B /// ankyrin repeat domain 20 family, member A pseudogene	NA	NA
7919151	6.62073	6.74523	5.91251	6.21484	---	---	NA	NA
7919155	5.41527	5.38726	4.62354	4.82086	---	---	NA	NA
7919193	6.69935	7.79508	7.14091	7.5042	NUDT4P1	nudix (nucleoside diphosphate linked moiety X)-type motif 4 pseudogene 1	440672	NA	12
7919226	4.43787	5.24576	5.52526	5.44969	POLR3C	polymerase (RNA) III (DNA directed) polypeptide C (62kD)	10623	NA	1
7919251	3.73351	5.16502	6.33255	5.8632	GPR89B	G protein-coupled receptor 89B	51463	NA	1
7919267	6.76633	6.31834	5.60306	6.1201	---	---	NA	NA
7919269	7.7466	8.10918	6.14001	7.21345	RNU1A	RNA, U1A small nuclear	6060	180680
7919271	7.92152	8.76307	8.88906	9.07975	RP11-94I2.2	hypothetical protein LOC200030	200030	NA	1, 1
7919299	5.40535	4.63086	3.92686	4.43515	LOC100130236	hypothetical LOC100130236	100130236	NA
7919301	6.44287	5.72671	5.13347	5.69382	LOC100130236	hypothetical LOC100130236	100130236	NA
7919303	4.91205	3.95129	3.13951	3.74016	---	---	NA	NA
7919305	4.23871	5.05299	6.16212	5.66569	PRKAB2	protein kinase, AMP-activated, beta 2 non-catalytic subunit	5565	602741	1
7919314	4.36994	4.65737	4.91697	4.75775	FMO5	flavin containing monooxygenase 5	2330	603957	1, 1
7919326	4.83106	5.29698	5.54954	5.02459	ACP6	acid phosphatase 6, lysophosphatidic	51205	611471	1
7919347	6.76633	6.31834	5.60306	6.1201	---	---	NA	NA
7919349	7.7466	8.10918	6.14001	7.21345	RNU1A	RNA, U1A small nuclear	6060	180680
7919351	7.93444	8.78568	8.90754	9.09425	RP11-94I2.2	hypothetical protein LOC200030	200030	NA	1, 1
7919380	5.40535	4.63086	3.92686	4.43515	LOC100130236	hypothetical LOC100130236	100130236	NA
7919384	4.97742	4.2573	3.66922	4.01506	---	---	NA	NA
7919386	7.44347	6.80888	6.03497	6.73682	---	---	NA	NA
7919392	6.62073	6.74523	5.91251	6.21484	---	---	NA	NA
7919405	5.41527	5.38726	4.62354	4.82086	---	---	NA	NA
7919412	8.15534	8.81549	8.9729	9.1186	NBPF16	neuroblastoma breakpoint family, member 16	728936	NA	1, 1
7919436	8.81011	9.77891	10.2318	9.9997	PPIAL4A	peptidylprolyl isomerase A (cyclophilin A)-like 4A	164022	608608	1, 1, 1
7919438	8.28244	9.06372	9.19595	9.38651	NBPF16	neuroblastoma breakpoint family, member 16	728936	NA	1, 1
7919560	4.10167	3.47053	2.71901	3.02479	---	---	NA	NA
7919566	5.29606	5.00868	4.41484	4.69723	---	---	NA	NA
7919568	5.58186	5.2604	4.81871	4.88657	---	---	NA	NA
7919572	4.39745	3.60822	3.17819	3.47005	---	---	NA	NA
7919576	7.46618	8.01708	6.43757	7.12228	RNU1A	RNA, U1A small nuclear	6060	180680
7919578	4.58523	5.94803	4.74288	5.85713	---	---	NA	NA
7919580	4.40852	5.24005	5.47301	5.9127	LOC440570	LOC440570	440570	NA
7919582	6.57237	6.3883	5.45627	5.95624	LOC100133075	hypothetical LOC100133075	NA	NA
7919584	4.52527	5.08566	5.88369	5.51247	HIST2H2BF	histone cluster 2, H2bf	440689	NA	1
7919589	6.62182	6.25695	5.70034	6.06652	HIST2H3D	histone cluster 2, H3d	653604	NA	1
7919591	3.64372	3.68607	4.07579	3.44909	FAM72D /// FAM72A /// FAM72B /// FAM72C	family with sequence similarity 72, member D /// family with sequence similarity 72, member A /// family with sequence similarity 72, member B /// family with sequence similarity 72, member C	NA	NA
7919596	4.40852	5.24005	5.47301	5.9127	LOC440570	LOC440570	440570	NA
7919598	6.5922	5.90936	4.77852	5.37005	LOC100133555	similar to LOC440570	100133555	NA
7919600	6.78021	6.4356	6.08227	6.1942	---	---	NA	NA
7919604	4.81867	4.14565	4.03315	3.93268	LOC729127	hypothetical protein LOC729127	729127	NA
7919612	6.38048	5.98165	5.35707	5.72227	HIST2H3D	histone cluster 2, H3d	653604	NA	1
7919619	4.88022	5.73199	5.97765	5.20839	HIST2H2AA3	histone cluster 2, H2aa3	8337	142720	1, 1
7919637	4.78651	5.10979	6.08277	5.00055	HIST2H2BE	histone cluster 2, H2be	8349	601831	1
7919659	6.09797	5.59356	5.00842	5.29476	SF3B4	splicing factor 3b, subunit 4, 49kDa	10262	605593	1
7919715	6.64088	7.72487	8.67682	8.10262	ANP32E	acidic (leucine-rich) nuclear phosphoprotein 32 family, member E	81611	609611	1, 1
7919749	3.85459	3.95514	4.65096	3.74892	---	---	NA	NA
7919751	5.21463	5.94858	6.42816	6.12033	MCL1	myeloid cell leukemia sequence 1 (BCL2-related)	4170	159552	1
7919761	4.96809	5.02214	6.63697	5.49117	---	---	NA	NA
7919763	5.60162	5.76649	5.67009	5.60557	ENSA	endosulfine alpha	2029	603061	1, 1, 1, 1, 1
7919780	3.60379	5.50357	6.25918	5.63256	GOLPH3L	golgi phosphoprotein 3-like	55204	612208	1
7919800	4.60216	4.67803	5.36842	4.82749	CTSS	cathepsin S	1520	116845	1
7919815	5.60264	5.53213	7.95687	6.36896	CTSK	cathepsin K	1513	265800, 601105	1
7919825	5.53103	6.36274	7.11485	6.61794	ARNT	aryl hydrocarbon receptor nuclear translocator	405	126110	1
7919854	6.50474	6.6542	6.76669	6.93171	---	---	NA	NA
7919856	5.32321	5.91752	6.02227	5.88297	LASS2	LAG1 homolog, ceramide synthase 2	29956	606920	1
7919888	4.89767	6.06867	6.4856	6.27101	CDC42SE1	CDC42 small effector 1	56882	NA	1
7920000	5.9574	6.81002	7.20256	7.22176	POGZ	pogo transposable element with ZNF domain	23126	NA	1, 1
7920100	4.4642	4.25064	5.96821	4.13181	THEM5	thioesterase superfamily member 5	284486	NA	1
7920123	7.63484	8.8627	9.67069	8.81639	S100A10	S100 calcium binding protein A10	6281	114085	1
7920128	7.82347	8.83989	8.87111	8.40601	S100A11	S100 calcium binding protein A11	6282	603114	1
7920135	4.33609	3.63173	3.96573	3.82943	TCHHL1	trichohyalin-like 1	126637	NA	1
7920141	6.43877	5.98694	8.16065	5.79823	TCHH	trichohyalin	7062	190370	1
7920146	4.10753	3.49662	4.24388	4.04878	RPTN	repetin	126638	NA	1
7920165	7.90569	7.16255	10.8088	7.62307	FLG	filaggrin	2312	135940, 146700, 603165, 605803	1
7920175	6.53887	6.2408	10.4757	6.76872	FLG2	filaggrin family member 2	388698	NA	1
7920182	5.93282	5.54474	5.61623	5.32355	LCE3E	late cornified envelope 3E	353145	612617	1
7920185	6.23103	6.31979	6.55665	5.66352	LCE3D	late cornified envelope 3D	84648	612616	1
7920193	7.15318	7.04422	10.7437	6.89151	LCE1C	late cornified envelope 1C	353133	612605	1
7920196	3.5603	3.08885	3.46114	2.77714	SPRR2D	small proline-rich protein 2D	6703	NA	1
7920201	6.43644	5.76997	5.21913	4.60081	SPRR2B	small proline-rich protein 2B	6701	182268	1
7920205	7.38666	6.72495	6.51312	4.93428	SPRR2A	small proline-rich protein 2A	6700	182267	1
7920210	5.9945	5.07128	5.27258	3.88503	SPRR2B	small proline-rich protein 2B	6701	182268	1
7920214	7.20566	7.24062	9.49765	5.96296	SPRR2E	small proline-rich protein 2E	6704	NA	1
7920217	8.13906	7.77154	8.96448	6.97909	SPRR2G	small proline-rich protein 2G	6706	NA	1
7920220	4.87826	4.69604	5.25656	4.44197	PGLYRP3	peptidoglycan recognition protein 3	114771	608197	1
7920238	3.52515	2.96129	3.03934	2.85435	S100A12	S100 calcium binding protein A12	6283	603112	1
7920244	8.84657	8.57851	8.489	7.70622	S100A8	S100 calcium binding protein A8	6279	123885	1
7920252	8.98767	8.2966	7.73867	6.9211	S100A7	S100 calcium binding protein A7	6278	600353	1
7920258	7.30835	7.65992	7.66931	7.82442	S100A6	S100 calcium binding protein A6	6277	114110	1
7920271	7.65524	8.55045	8.63263	8.58597	S100A4	S100 calcium binding protein A4	6275	114210	1, 1
7920278	5.38445	5.75203	6.39783	5.14571	S100A3	S100 calcium binding protein A3	6274	176992	1
7920285	7.95412	8.82835	9.19304	8.73556	S100A2	S100 calcium binding protein A2	6273	176993	1
7920297	6.58141	7.17108	7.8286	6.92441	S100A14	S100 calcium binding protein A14	57402	607986	1
7920317	5.64028	6.79482	7.93389	6.54992	ILF2	interleukin enhancer binding factor 2, 45kDa	3608	603181	1
7920333	2.90821	3.21204	3.11329	3.38108	---	---	NA	NA
7920341	5.36222	6.11064	6.88463	6.29015	GATAD2B	GATA zinc finger domain containing 2B	57459	NA	1
7920409	6.0467	6.8341	7.20467	6.84834	JTB	jumping translocation breakpoint	10899	604671	1
7920422	7.3334	7.90388	7.9619	8.04085	RAB13	RAB13, member RAS oncogene family	5872	602672	1
7920492	5.31726	6.69208	7.30132	6.58664	C1orf43	chromosome 1 open reading frame 43	25912	NA	1
7920515	5.78902	6.26913	6.78439	6.56401	UBE2Q1	ubiquitin-conjugating enzyme E2Q family member 1	55585	NA	1
7920642	6.23878	6.33527	6.36025	6.14723	MUC1	mucin 1, cell surface associated	4582	158340	1
7920659	5.21333	5.90595	6.31338	5.93378	KRTCAP2	keratinocyte associated protein 2	200185	NA	1
7920664	4.6459	5.19712	5.64761	5.71629	THBS3	thrombospondin 3	7059	188062	1
7920687	4.54413	3.84949	3.56679	3.61109	GBAP	glucosidase, beta; acid, pseudogene	2630	NA	1
7920737	7.61853	7.50455	6.63087	7.35298	CLK2	CDC-like kinase 2	1196	602989	1
7920744	5.95734	5.30203	4.62898	4.98458	PKLR	pyruvate kinase, liver and RBC	5313	102900, 266200, 609712	1, 1
7920766	5.10055	6.22507	7.12881	6.48812	ASH1L	ash1 (absent, small, or homeotic)-like (Drosophila)	55870	607999	1
7920799	7.2614	7.67172	7.68393	7.71252	YY1AP1	YY1 associated protein 1	55249	607860	1, 1
7920810	6.0032	6.4978	6.20022	6.47659	GON4L	gon-4-like (C. elegans)	54856	610393	1, 1
7920839	5.05791	5.44485	6.34887	5.98616	RIT1	Ras-like without CAAX 1	6016	609591	1
7920852	5.29244	5.90054	6.38713	6.22275	KIAA0907	KIAA0907	22889	NA	1
7920873	8.09382	6.88093	5.76586	6.52351	SNORA42	small nucleolar RNA, H/ACA box 42	677823	NA	1
7920875	4.1381	3.80881	3.54132	4.08181	SCARNA4	small Cajal body-specific RNA 4	677771	NA	1
7920903	5.6441	6.88963	7.77922	7.00158	SSR2	signal sequence receptor, beta (translocon-associated protein beta)	6746	600867	1
7920984	5.55972	6.36069	6.75299	6.27797	CCT3	chaperonin containing TCP1, subunit 3 (gamma)	7203	600114	1
7921012	5.52213	4.47115	3.89719	4.3748	hsa-mir-9-1	hsa-mir-9-1	NA	NA
7921099	4.94046	5.61312	5.84101	5.15421	CRABP2	cellular retinoic acid binding protein 2	1382	180231	1
7921110	5.10483	5.83399	6.06759	5.60125	ISG20L2	interferon stimulated exonuclease gene 20kDa-like 2	81875	611930	1
7921119	5.67162	5.36452	4.34949	5.08709	---	---	NA	NA
7921121	5.3438	6.23173	6.26171	5.87718	MRPL24	mitochondrial ribosomal protein L24	79590	611836	1
7921144	5.89623	5.2139	4.81899	5.05183	SH2D2A	SH2 domain protein 2A	9047	604514	1
7921155	5.54819	4.89387	4.41598	4.77419	INSRR	insulin receptor-related receptor	3645	147671	1
7921228	5.73231	6.24592	7.00552	6.19298	ETV3	ets variant 3	2117	164873	1, 1
7921342	4.81936	4.20272	3.91547	4.15981	hCG_1994895	hCG1994895	729866	NA
7921344	4.81053	5.46549	6.43112	5.76096	ELL2	elongation factor, RNA polymerase II, 2	22936	601874	5
7921358	4.967	3.75488	3.87403	4.12944	---	---	NA	NA
7921420	4.60977	3.60744	3.3848	3.60277	OR6K2	olfactory receptor, family 6, subfamily K, member 2	81448	NA	1
7921445	4.98222	4.01675	3.8246	4.13078	OR10J3	olfactory receptor, family 10, subfamily J, member 3	441911	NA	1
7921552	5.8858	6.53329	6.53037	6.70842	WDR42A	WD repeat domain 42A	50717	NA	1
7921571	4.71417	5.67596	6.07276	5.50096	PEX19	peroxisomal biogenesis factor 19	5824	214100, 600279	1
7921583	4.18227	5.84531	6.88654	6.26431	COPA	coatomer protein complex, subunit alpha	1314	601924	1
7921621	4.63832	4.37761	4.1003	4.43039	---	---	NA	NA
7921713	5.9707	6.7084	7.21198	6.39186	F11R	F11 receptor	50848	605721	1
7921834	5.28867	4.63805	4.11361	4.69009	APOA2	apolipoprotein A-II	336	107670, 143890	1
7921840	6.05745	5.46285	5.16304	5.2526	NR1I3	nuclear receptor subfamily 1, group I, member 3	9970	603881	1
7921852	5.25174	5.71588	5.08607	6.18962	MPZ	myelin protein zero	4359	118200, 145900, 159440, 180800, 605253, 607677, 607736, 607791	1
7921882	5.37782	5.07652	5.322	5.6	OLFML2B	olfactomedin-like 2B	25903	NA	1
7921916	4.59939	5.48294	6.22863	6.56188	RGS5	regulator of G-protein signaling 5	8490	145500, 603276	1
7921970	4.69736	6.07556	6.96126	5.83889	ALDH9A1	aldehyde dehydrogenase 9 family, member A1	223	602733	1
7921987	4.41641	5.86341	6.54081	6.33064	TMCO1	transmembrane and coiled-coil domains 1	54499	NA	1
7922029	5.18126	4.61039	4.18468	4.50129	GPA33	glycoprotein A33 (transmembrane)	10223	602171	1
7922051	5.25677	5.37811	6.89783	5.28745	CREG1	cellular repressor of E1A-stimulated genes 1	8804	NA	1
7922095	5.13041	5.69787	6.40042	5.88207	BRP44	brain protein 44	25874	NA	1, 1, 1
7922104	4.59783	6.16984	6.28933	5.97952	GCSH	glycine cleavage system protein H (aminomethyl carrier)	2653	238330, 605899	16
7922121	3.55318	4.38929	6.05943	5.00212	ANKRD26L1	ankyrin repeat domain 26-like 1	84832	NA	1
7922130	4.8656	6.70335	6.72963	6.68871	DPT	dermatopontin	1805	125597	1
7922137	4.54002	4.58894	5.79805	5.49911	NME7	non-metastatic cells 7, protein expressed in (nucleoside-diphosphate kinase)	29922	NA	1, 1
7922162	3.76554	3.71017	4.39113	3.7331	SLC19A2	solute carrier family 19 (thiamine transporter), member 2	10560	249270, 603941	1
7922229	5.20045	5.86402	4.59758	5.35154	SELE	selectin E	6401	131210, 145500, 161950	1
7922243	4.32761	4.57548	5.00957	4.40167	C1orf156	chromosome 1 open reading frame 156	92342	NA	1
7922266	4.89721	4.26711	3.71233	4.09007	---	---	NA	NA
7922268	4.88278	5.27695	6.11901	5.94161	KIFAP3	kinesin-associated protein 3	22920	601836	1
7922297	4.67157	3.99354	3.51926	3.73146	---	---	NA	NA
7922299	7.30634	6.68596	6.04633	6.46116	---	---	NA	NA
7922309	3.40678	3.97656	4.69054	4.25925	VAMP4	vesicle-associated membrane protein 4	8674	606909	1
7922328	5.79889	4.98835	4.68173	4.79169	hsa-mir-199a-2 /// FJ623959	hsa-mir-199a-2 /// FJ623959	NA	NA
7922351	4.24564	3.90635	3.97564	3.86735	LOC646870	hypothetical protein LOC646870	646870	NA
7922400	5.11381	6.4234	7.78153	6.59974	---	---	NA	NA
7922402	3.62893	5.5285	7.64719	6.62481	SNORD47	small nucleolar RNA, C/D box 47	26802	NA	1
7922404	2.97168	3.75288	6.56083	5.18684	SNORD80	small nucleolar RNA, C/D box 80	26774	NA	1
7922406	4.85388	4.64248	4.75433	4.69235	SNORD79	small nucleolar RNA, C/D box 79	26770	NA	1
7922408	2.39539	2.53727	3.75885	3.52987	SNORD78	small nucleolar RNA, C/D box 78	692198	NA	1
7922414	5.93197	5.51508	5.45804	5.59897	SNORD76	small nucleolar RNA, C/D box 76	692196	NA	1
7922416	3.97082	4.03434	3.96403	4.22062	SNORD75	small nucleolar RNA, C/D box 75	692195	NA	1
7922418	5.23063	5.90206	5.63522	5.44967	SNORD74	small nucleolar RNA, C/D box 74	619498	NA	1
7922432	5.13124	6.05395	7.05136	6.55203	RC3H1	ring finger and CCCH-type zinc finger domains 1	149041	609424	1
7922462	4.65222	5.64316	5.91837	5.39263	MRPS14	mitochondrial ribosomal protein S14	63931	611978	1
7922504	5.3956	5.9335	7.16573	6.61533	RFWD2	ring finger and WD repeat domain 2	64326	608067	1
7922525	5.52889	4.77978	4.56323	4.73735	ASTN1	astrotactin 1	NA	NA	NA
7922598	3.20799	3.59398	5.03856	4.10995	ANGPTL1	angiopoietin-like 1	9068	603874	1
7922646	2.91484	3.82567	5.8854	4.47563	IFRG15	interferon responsive gene 15	64163	NA	1
7922656	5.01099	5.20753	5.41839	5.3516	ACBD6	acyl-Coenzyme A binding domain containing 6	84320	NA	1
7922669	4.5112	5.41671	6.04344	5.56155	STX6	syntaxin 6	10228	603944	1
7922684	6.5322	5.94	5.16434	5.662	---	---	NA	NA
7922717	6.27652	5.95457	5.29639	5.9325	RGS16	regulator of G-protein signaling 16	6004	602514	1
7922752	7.19893	6.5694	6.34982	6.44263	---	---	NA	NA
7922807	5.20148	4.44885	3.90854	4.18268	GLT25D2	glycosyltransferase 25 domain containing 2	23127	NA	1
7922823	4.21476	4.60445	5.57658	5.18202	EDEM3	ER degradation enhancer, mannosidase alpha-like 3	80267	610214	1
7922846	4.27931	5.04989	5.09798	4.95648	FAM129A	family with sequence similarity 129, member A	116496	NA	1
7922887	2.54137	3.53467	4.14984	4.1355	---	---	NA	NA
7922889	4.86897	6.56282	7.5186	7.26299	IVNS1ABP	influenza virus NS1A binding protein	10625	609209	1
7922910	3.6857	3.03697	2.40722	2.67141	---	---	NA	NA
7922912	6.92672	7.33487	7.99812	7.83206	TPR	translocated promoter region (to activated MET oncogene)	7175	189940	1
7923007	5.73528	6.46469	7.10857	6.72421	UCHL5	ubiquitin carboxyl-terminal hydrolase L5	51377	610667	1
7923119	3.958	4.45827	5.09785	4.86649	ZBTB41	zinc finger and BTB domain containing 41	360023	NA	1
7923131	4.41062	4.61546	5.14722	5.00649	DENND1B	DENN/MADD domain containing 1B	163486	NA	1, 1
7923317	5.45977	4.62144	4.16457	4.56726	ASCL5	achaete-scute complex homolog 5 (Drosophila)	NA	NA
7923332	8.32936	8.26037	7.33811	8.14719	TNNT2	troponin T type 2 (cardiac)	7139	115195, 191045, 601494, 612422	1
7923372	5.79883	5.39016	4.7271	5.01391	PHLDA3	pleckstrin homology-like domain, family A, member 3	23612	607054	1
7923378	5.94607	7.2868	6.92797	7.36204	CSRP1	cysteine and glycine-rich protein 1	1465	123876	1, 1
7923386	6.97727	7.47129	6.80809	7.41484	LMOD1	leiomodin 1 (smooth muscle)	25802	602715	1
7923436	4.71388	4.28991	3.80144	3.94515	---	---	NA	NA
7923438	10.1788	10.5435	10.7774	10.4331	RPS27	ribosomal protein S27	6232	603702	1
7923440	2.44245	3.51288	4.05205	4.07546	---	---	NA	NA
7923453	4.39331	5.80182	6.87746	6.0162	JARID1B	jumonji, AT rich interactive domain 1B	10765	605393	1
7923503	5.59909	6.89223	7.90495	6.8537	ADIPOR1	adiponectin receptor 1	51094	607945	1, 1
7923516	5.32904	6.08058	6.72345	6.09594	CYB5R1	cytochrome b5 reductase 1	51706	608341	1
7923547	5.40195	5.75685	6.39471	5.54692	CHI3L1	chitinase 3-like 1 (cartilage glycoprotein-39)	1116	181500, 601525, 611960	1
7923562	4.42793	4.12496	3.7362	3.85946	CHIT1	chitinase 1 (chitotriosidase)	1118	600031	1
7923578	4.44108	4.88868	5.42501	5.04627	FMOD	fibromodulin	2331	600245	1
7923582	4.30122	5.29511	5.70357	5.32324	---	---	NA	NA
7923628	5.84459	4.92739	4.56108	4.85404	GOLT1A	golgi transport 1 homolog A (S. cerevisiae)	127845	NA	1
7923698	4.85842	4.8723	4.99916	4.55226	---	---	NA	NA
7923798	7.89963	9.17821	9.03637	9.43585	NUCKS1	nuclear casein kinase and cyclin-dependent kinase substrate 1	64710	611912	1
7923810	5.71932	3.99626	3.82365	4.74027	---	---	NA	NA
7923837	6.58309	6.73512	8.27341	6.0178	PM20D1	peptidase M20 domain containing 1	148811	NA	1
7923889	5.3838	6.21153	5.96678	6.10428	LGTN	ligatin	1939	151625	1
7923956	5.92309	5.25575	4.68128	5.34433	---	---	NA	NA
7923965	4.35452	3.60027	3.17031	3.91157	---	---	NA	NA
7923967	5.63441	5.34632	6.0322	5.1487	YOD1	YOD1 OTU deubiquinating enzyme 1 homolog (S. cerevisiae)	55432	612023	1
7923974	3.33109	4.8454	6.09519	6.34818	hsa-mir-29c /// EU154352	hsa-mir-29c /// EU154352	NA	NA
7923978	5.56895	6.90713	7.50763	7.43707	CD34	CD34 molecule	947	142230	1
7924058	4.59181	5.87791	6.46936	5.64617	IRF6	interferon regulatory factor 6	3664	119300, 119500, 607199, 608864	1
7924107	3.5492	4.28035	4.9199	4.42567	LPGAT1	lysophosphatidylglycerol acyltransferase 1	9926	610473	1
7924119	4.2377	4.64459	5.11587	4.8008	INTS7	integrator complex subunit 7	25896	611350	1
7924144	8.85052	9.30275	10.0243	9.43018	RPL21	ribosomal protein L21	6144	603636	13
7924166	5.81043	5.52004	4.31055	5.06977	BATF3	basic leucine zipper transcription factor, ATF-like 3	55509	612470	1
7924184	4.49771	3.60983	3.61597	3.71018	LQK1	hypothetical LOC642946	642946	610864
7924190	3.74841	4.17644	5.1559	4.74334	ANGEL2	angel homolog 2 (Drosophila)	90806	NA	1
7924207	5.8042	6.40788	7.21382	6.85518	PTPN14	protein tyrosine phosphatase, non-receptor type 14	5784	603155	1
7924230	6.13493	5.71389	4.94082	5.39071	FAM108A1	family with sequence similarity 108, member A1	81926	NA	19
7924351	4.06561	5.29387	6.4154	5.5042	EPRS	glutamyl-prolyl-tRNA synthetase	2058	138295	1
7924386	7.50266	6.74439	6.27086	6.62209	---	---	NA	NA
7924388	3.93237	4.19173	4.8125	4.21291	BPNT1	3'(2'), 5'-bisphosphate nucleotidase 1	10380	604053	1
7924405	3.89428	4.59507	5.81226	5.14407	RAB3GAP2	RAB3 GTPase activating protein subunit 2 (non-catalytic)	25782	212720, 609275	1
7924445	4.43401	3.69444	3.56586	3.74223	LOC400804	hypothetical LOC400804	400804	NA	1
7924463	3.48986	2.96587	3.31412	3.51341	---	---	NA	NA
7924526	4.32921	5.09306	5.53062	5.21789	TP53BP2	tumor protein p53 binding protein, 2	7159	602143	1
7924549	5.16906	6.06101	6.27233	6.5593	C20orf69	chromosome 20 open reading frame 69	140849	NA
7924558	5.04591	5.50467	6.1457	5.65727	NVL	nuclear VCP-like	4931	602426	1
7924582	3.87004	5.54736	7.26554	6.29018	WDR26	WD repeat domain 26	80232	NA	1
7924603	4.36929	5.08034	5.83165	5.34272	LBR	lamin B receptor	3930	169400, 215140, 600024	1, 1
7924619	5.26144	6.16836	6.56731	6.18271	ENAH	enabled homolog (Drosophila)	55740	609061	1
7924636	5.44993	6.44068	6.15999	6.34796	TMEM63A	transmembrane protein 63A	9725	NA	1
7924686	4.78411	5.22489	5.5287	5.21699	C1orf55	chromosome 1 open reading frame 55	163859	NA	1
7924733	4.4064	5.251	5.28517	5.16279	PARP1	poly (ADP-ribose) polymerase 1	142	173870	1
7924773	4.59371	5.42281	6.08884	6.14896	CDC42BPA	CDC42 binding protein kinase alpha (DMPK-like)	8476	603412	1
7924817	3.5915	3.52857	4.22613	4.29262	PRO2012	hypothetical protein PRO2012	55478	NA
7924840	5.00501	4.64625	4.17704	4.26944	---	---	NA	NA
7924884	5.57718	4.62682	4.20861	4.47278	HIST3H3	histone cluster 3, H3	8290	602820	1
7924910	6.497	6.78915	6.05552	6.55802	ACTA1	actin, alpha 1, skeletal muscle	58	102610, 161800, 255310	1
7924923	3.81363	4.18927	4.80763	4.53812	NUP133	nucleoporin 133kDa	55746	607613	1
7924967	3.23202	3.36816	3.88427	3.7779	---	---	NA	NA
7925028	5.70364	5.51723	5.11725	5.17034	FAM89A	family with sequence similarity 89, member A	375061	NA	1
7925128	5.9083	5.58955	5.62265	5.28251	---	---	NA	NA
7925170	4.88045	4.08858	3.31619	3.87841	PP2672	hypothetical LOC100130249	100130249	NA
7925174	5.19826	6.4701	6.76761	6.38229	TOMM20	translocase of outer mitochondrial membrane 20 homolog (yeast)	9804	601848	1
7925184	6.26368	6.88496	7.57554	7.0804	RBM34	RNA binding motif protein 34	23029	NA	1
7925201	4.77848	5.83331	6.49854	6.49245	ARID4B	AT rich interactive domain 4B (RBP1-like)	51742	609696	1
7925229	5.23583	6.032	6.67816	6.38321	B3GALNT2	beta-1,3-N-acetylgalactosaminyltransferase 2	148789	610194	1
7925244	7.13179	6.47202	5.5323	5.98776	---	---	NA	NA
7925257	4.81056	5.62457	6.57928	6.36426	LYST	lysosomal trafficking regulator	1130	214500, 606897	1
7925320	3.83862	5.20034	5.22415	5.10993	NID1	nidogen 1	4811	131390	1
7925364	4.71907	5.07995	5.79525	5.18471	HEATR1	HEAT repeat containing 1	55127	NA	1
7925413	6.14363	5.60204	4.98975	5.29657	MT1P2	metallothionein 1 pseudogene 2	645745	NA
7925434	4.82313	4.14011	3.72442	3.85886	---	---	NA	NA
7925442	5.28243	4.35378	4.08126	4.19174	---	---	NA	NA
7925446	6.3407	5.3062	4.53995	4.94148	---	---	NA	NA
7925448	5.07968	4.56604	3.98975	4.34446	---	---	NA	NA
7925480	4.753	4.98056	5.3251	4.99512	FH	fumarate hydratase	2271	136850, 150800, 605839, 606812	1
7925504	5.72237	4.97492	4.58199	4.8828	MAP1LC3C	microtubule-associated protein 1 light chain 3 gamma	440738	609605	1
7925509	6.80074	6.34018	5.5712	5.97077	---	---	NA	NA
7925525	3.50949	3.60547	4.42424	4.31613	CEP170	centrosomal protein 170kDa	9859	NA	1
7925531	4.84954	6.37663	6.62151	6.80432	AKT3	v-akt murine thymoma viral oncogene homolog 3 (protein kinase B, gamma)	10000	611223	1, 1
7925550	4.45729	5.63714	6.77542	6.25471	ADSS	adenylosuccinate synthase	159	103060	1
7925561	5.32013	6.18704	7.1689	7.04332	C1orf199	chromosome 1 open reading frame 199	284702	NA	1
7925565	7.55567	8.61331	8.91748	8.82683	HNRNPU	heterogeneous nuclear ribonucleoprotein U (scaffold attachment factor A)	3192	602869	1
7925585	6.09695	5.52987	4.79347	5.36352	EFCAB2	EF-hand calcium binding domain 2	84288	NA	1, 1, 1, 1
7925607	3.49503	3.38414	3.6276	3.96288	---	---	NA	NA
7925622	3.95885	4.68778	5.58308	5.25246	AHCTF1	AT hook containing transcription factor 1	25909	610853	1
7925687	5.25018	4.49313	3.94844	4.33753	C1orf229	chromosome 1 open reading frame 229	NA	NA
7925691	3.56154	3.91613	4.4805	4.22674	ZNF124	zinc finger protein 124	7678	194631	1
7925701	4.50969	4.24033	4.78762	4.46681	---	---	NA	NA
7925718	4.60136	3.7183	3.16291	3.69833	OR2B11	olfactory receptor, family 2, subfamily B, member 11	127623	NA	1
7925720	4.58489	3.80256	3.21239	3.55555	OR2C3	olfactory receptor, family 2, subfamily C, member 3	81472	NA	1
7925739	6.11075	5.26681	4.88878	5.13641	---	---	NA	NA
7925749	5.44193	4.72807	4.25788	4.63753	OR2T34	olfactory receptor, family 2, subfamily T, member 34	127068	NA	1
7925792	5.80642	6.84306	7.23168	7.15503	ZMYND11	zinc finger, MYND domain containing 11	10771	608668	10, 10
7925821	3.92714	5.66773	6.61884	6.1086	---	---	NA	NA
7925918	5.00547	5.49832	5.50298	5.49414	AKR1C1	aldo-keto reductase family 1, member C1 (dihydrodiol dehydrogenase 1; 20-alpha (3-alpha)-hydroxysteroid dehydrogenase)	1645	600449	10
7925929	4.32262	5.51444	5.91904	5.32871	AKR1C3	aldo-keto reductase family 1, member C3 (3-alpha hydroxysteroid dehydrogenase, type II)	8644	603966	10
7925950	5.81715	4.86995	4.53133	4.99162	UCN3	urocortin 3 (stresscopin)	114131	605901	10
7925954	5.56897	6.69112	7.45825	7.11357	NET1	neuroepithelial cell transforming 1	10276	606450	10, 10
7925978	4.28174	5.14217	5.56833	5.2196	C10orf18	chromosome 10 open reading frame 18	54906	NA	10
7925996	4.72197	5.2015	5.48523	5.30624	FBXO18	F-box protein, helicase, 18	84893	607222	10, 10
7926037	5.41639	6.54328	5.38316	5.66212	PFKFB3	6-phosphofructo-2-kinase/fructose-2,6-biphosphatase 3	5209	605319	10, 10
7926059	5.93879	6.50074	5.91778	6.43514	---	---	NA	NA
7926084	6.2765	6.60875	7.45748	6.80072	ATP5C1	ATP synthase, H+ transporting, mitochondrial F1 complex, gamma polypeptide 1	509	108729	10
7926105	6.02282	6.22161	7.91276	6.79358	GATA3	GATA binding protein 3	2625	131320, 146255	10
7926127	4.66212	5.48074	5.47774	5.46667	CUGBP2	CUG triplet repeat, RNA binding protein 2	10659	602538	10, 10, 10
7926150	6.10024	5.66939	5.27201	5.22804	USP6NL /// LOC439951	USP6 N-terminal like /// hypothetical LOC439951	NA	NA
7926189	4.96605	5.78027	6.58913	6.04241	SEC61A2	Sec61 alpha 2 subunit (S. cerevisiae)	55176	NA	10, 10
7926205	3.23577	3.61273	3.76651	3.90618	---	---	NA	NA
7926207	5.50668	6.8318	8.02873	7.2096	CDC123	cell division cycle 123 homolog (S. cerevisiae)	8872	NA	10
7926239	5.85875	6.86985	7.20051	7.13673	OPTN	optineurin	10133	137760, 602432, 606657	10
7926283	4.81497	6.28349	6.70706	6.48639	PRPF18	PRP18 pre-mRNA processing factor 18 homolog (S. cerevisiae)	8559	604993	10
7926356	4.17708	4.99329	5.54059	4.88571	PTER	phosphotriesterase related	9317	604446	10
7926368	7.52955	8.70656	8.61405	8.75388	VIM	vimentin	7431	193060	10
7926385	5.04842	6.08685	6.74316	6.32428	STAM	signal transducing adaptor molecule (SH3 domain and ITAM motif) 1	8027	601899	10
7926410	4.72124	4.68385	6.23667	5.15869	MRC1	mannose receptor, C type 1	4360	153618	10, 10
7926451	4.72124	4.68385	6.23667	5.15869	MRC1	mannose receptor, C type 1	4360	153618	10, 10
7926539	3.94894	3.26973	3.18708	3.41056	---	---	NA	NA
7926543	5.06337	4.09293	3.96961	4.0575	---	---	NA	NA
7926545	5.18049	6.14989	7.75144	6.44721	PLXDC2	plexin domain containing 2	84898	606827	10
7926565	4.83567	6.1258	6.9811	6.74427	MLLT10	myeloid/lymphoid or mixed-lineage leukemia (trithorax homolog, Drosophila); translocated to, 10	8028	601626, 602409	10, 10
7926596	5.06091	6.10682	7.12027	6.63288	COMMD3	COMM domain containing 3	23412	NA	10
7926609	4.4781	4.91137	5.32969	5.28374	BMI1	BMI1 polycomb ring finger oncogene	648	164831	10
7926661	5.38638	6.05136	5.79413	6.14558	MSRB2	methionine sulfoxide reductase B2	22921	NA	10
7926674	6.50399	6.11669	5.61916	5.65592	PTF1A	pancreas specific transcription factor, 1a	256297	607194, 609069	10
7926677	4.18986	5.39104	6.045	5.65809	OTUD1	OTU domain containing 1	220213	612022	10
7926679	5.86314	6.56651	6.50791	6.61513	KIAA1217	KIAA1217	56243	NA	10, 10
7926807	4.66636	4.77449	5.24763	5.05053	PDSS1	prenyl (decaprenyl) diphosphate synthase, subunit 1	23590	607426, 607429	10
7926821	4.37426	4.60537	5.57442	5.05427	MASTL	microtubule associated serine/threonine kinase-like	84930	188000, 608221	10
7926836	4.5305	5.80435	7.21893	6.41312	RAB18	RAB18, member RAS oncogene family	22931	602207	10
7926851	6.06686	6.7452	7.49099	7.11965	WAC	WW domain containing adaptor with coiled-coil	51322	NA	10, 10
7926875	4.45433	4.78362	4.69507	4.73889	BAMBI	BMP and activin membrane-bound inhibitor homolog (Xenopus laevis)	25805	604444	10
7926894	4.07314	3.78877	5.22006	4.43783	---	---	NA	NA
7926896	4.39377	6.31804	7.27953	6.366	CKS1B	CDC28 protein kinase regulatory subunit 1B	1163	116900	1
7926916	6.02554	6.57563	6.48699	6.73921	ZEB1	zinc finger E-box binding homeobox 1	6935	189909, 609141	10, 10, 10, 10, 10
7926934	4.75289	4.1473	3.72977	4.19707	---	---	NA	NA
7926979	4.88069	5.00398	5.4513	5.34864	---	---	NA	NA
7927028	5.10219	4.37712	4.16285	4.33756	GJD4	gap junction protein, delta 4, 40.1kDa	219770	611922	10
7927062	4.44547	4.90966	5.56625	5.26279	ZNF33A	zinc finger protein 33A	7581	194521	10
7927071	4.91606	5.0812	5.38814	5.57426	ZNF37A	zinc finger protein 37A	7587	NA	10
7927082	4.15616	4.55145	5.92332	5.43971	HSD17B7P2	hydroxysteroid (17-beta) dehydrogenase 7 pseudogene 2	158160	NA	10
7927089	3.48986	2.96587	3.31412	3.51341	---	---	NA	NA
7927091	5.39761	4.80756	4.3659	4.6384	LOC399744	hypothetical LOC399744	399744	NA	10
7927095	6.05171	6.88103	6.87354	7.15964	C20orf69	chromosome 20 open reading frame 69	140849	NA
7927106	4.57598	6.00091	7.01948	6.92097	---	---	NA	NA
7927108	6.0248	6.65064	7.09913	7.001	BMS1	BMS1 homolog, ribosome assembly protein (yeast)	9790	611448	10
7927146	4.6353	4.95779	5.57347	5.1658	CSGALNACT2	chondroitin sulfate N-acetylgalactosaminyltransferase 2	55454	NA	10
7927153	5.86655	5.01363	4.05489	4.55989	---	---	NA	NA
7927169	4.60454	3.51207	3.33594	3.28854	ZNF487	zinc finger protein 487	NA	NA
7927173	5.45216	5.10759	4.89589	5.14841	ZNF485	zinc finger protein 485	220992	NA	10
7927179	5.82255	4.96322	4.57769	5.01607	TMEM72	transmembrane protein 72	643236	NA	10
7927202	4.50895	4.98397	5.2945	5.2537	ZNF22	zinc finger protein 22 (KOX 15)	7570	194529	10
7927231	5.33429	6.34897	6.38888	6.63878	AGAP8	ArfGAP with GTPase domain, ankyrin repeat and PH domain 8	728404	NA	10
7927285	5.81873	5.99134	6.54507	6.13994	RHEB	Ras homolog enriched in brain	6009	601293	7
7927305	5.2917	6.20313	6.23342	6.3894	AGAP8	ArfGAP with GTPase domain, ankyrin repeat and PH domain 8	728404	NA	10
7927323	6.15478	7.02197	7.34001	7.1263	FAM21B	family with sequence similarity 21, member B	55747	NA	10, 10
7927353	5.72745	7.07774	7.20248	7.33181	AGAP8	ArfGAP with GTPase domain, ankyrin repeat and PH domain 8	728404	NA	10
7927363	9.10883	8.95256	11.0923	9.43317	FAM25B	family with sequence similarity 25, member B	100132929	NA	10, 10, 10
7927383	5.62154	4.95737	4.49519	4.81624	ZNF488	zinc finger protein 488	118738	NA	10
7927389	4.33867	4.47359	5.66741	5.5749	MAPK8	mitogen-activated protein kinase 8	5599	601158	10
7927513	5.41803	5.98962	6.45467	6.24152	FAM21C	family with sequence similarity 21, member C	253725	NA	10
7927519	5.69592	6.53362	7.53492	7.18608	TIMM23B	translocase of inner mitochondrial membrane 23 homolog B (yeast)	653252	NA
7927529	2.51276	2.38741	5.76015	2.4167	MSMB	microseminoprotein, beta-	4477	157145, 611928	10
7927536	4.48967	5.81233	7.16838	5.81643	NCOA4	nuclear receptor coactivator 4	8031	188550, 601984	10, 10, 10
7927548	4.08699	5.52606	6.82844	5.60257	TIMM23	translocase of inner mitochondrial membrane 23 homolog (yeast)	NA	NA
7927552	5.45079	6.50441	6.59218	6.79619	AGAP6	ArfGAP with GTPase domain, ankyrin repeat and PH domain 6	414189	NA	10
7927560	6.17803	7.01103	7.26835	7.14581	FAM21A	family with sequence similarity 21, member A	387680	NA	10
7927595	4.75712	4.64372	5.61546	4.87019	---	---	NA	NA
7927599	4.29348	4.59022	4.88269	4.68097	ASAH2B	N-acylsphingosine amidohydrolase (non-lysosomal ceramidase) 2B	653308	610987	10
7927606	4.12833	4.48374	4.92269	5.26099	PRKG1	protein kinase, cGMP-dependent, type I	5592	176894	10, 10
7927643	4.88253	4.20666	4.07909	4.29879	---	---	NA	NA
7927645	6.23217	5.40218	5.04226	5.13446	---	---	NA	NA
7927647	4.49251	3.65426	3.4074	3.36643	---	---	NA	NA
7927649	5.33247	6.35193	7.1387	6.51421	CISD1	CDGSH iron sulfur domain 1	55847	611932	10
7927669	4.49519	5.3247	6.54083	5.80451	TFAM	transcription factor A, mitochondrial	7019	600438	10
7927706	2.41911	2.34141	4.21716	2.88412	---	---	NA	NA
7927708	3.49559	3.68662	5.05133	4.36925	---	---	NA	NA
7927732	5.37558	6.49604	7.1658	6.78203	ARID5B	AT rich interactive domain 5B (MRF1-like)	84159	608538	10
7927786	4.29641	5.80012	6.82855	6.03998	REEP3	receptor accessory protein 3	221035	609348	10
7927799	4.24856	5.88866	7.30799	6.58753	REEP3	receptor accessory protein 3	221035	609348	10
7927814	4.58877	5.23088	5.92199	5.50641	SIRT1	sirtuin (silent mating type information regulation 2 homolog) 1 (S. cerevisiae)	23411	604479	10, 10
7927854	6.82781	7.87803	8.61354	8.33667	HNRNPH3	heterogeneous nuclear ribonucleoprotein H3 (2H9)	3189	602324	10
7927874	4.01072	4.1655	4.00484	4.00029	---	---	NA	NA
7927889	7.0382	7.80008	8.21439	8.23287	CCAR1	cell division cycle and apoptosis regulator 1	55749	612569	10
7927926	5.42335	6.42727	6.99814	6.65715	DDX50	DEAD (Asp-Glu-Ala-Asp) box polypeptide 50	79009	610373	10
7927936	4.40432	5.07425	6.07688	5.06906	DDX21	DEAD (Asp-Glu-Ala-Asp) box polypeptide 21	9188	606357	10
7927955	3.80845	4.69324	5.65017	5.14191	KIAA1279	KIAA1279	26128	609367, 609460	10
7927972	4.70207	6.4361	7.69266	6.5823	VPS26A	vacuolar protein sorting 26 homolog A (S. pombe)	9559	605506	10
7927981	4.52471	5.2103	5.92008	5.56594	SUPV3L1	suppressor of var1, 3-like 1 (S. cerevisiae)	6832	605122	10
7928119	4.29968	6.89084	7.78446	6.67316	EIF4EBP2	eukaryotic translation initiation factor 4E binding protein 2	1979	602224	10
7928171	4.55723	6.11695	7.37306	6.0812	SGPL1	sphingosine-1-phosphate lyase 1	8879	603729	10
7928300	4.97948	6.08784	6.21048	5.77583	C10orf104	chromosome 10 open reading frame 104	119504	NA	10
7928306	5.86225	6.27032	6.65807	6.44449	---	---	NA	NA
7928308	5.3633	5.76875	6.008	5.95452	DDIT4	DNA-damage-inducible transcript 4	54541	607729	10
7928354	4.38509	4.75816	4.94383	4.68375	FAM149B1	family with sequence similarity 149, member B1	317662	NA	10
7928367	3.90189	3.10408	2.8528	3.17229	---	---	NA	NA
7928401	4.64087	5.76936	5.83797	5.40073	CHCHD1	coiled-coil-helix-coiled-coil-helix domain containing 1	118487	608842	10
7928444	4.96497	5.98556	6.23409	6.16528	VCL	vinculin	7414	193065, 611407	10
7928471	4.75158	5.37893	6.48039	5.66481	ADK	adenosine kinase	132	102750	10, 10
7928489	2.28726	3.97125	5.48463	4.96717	---	---	NA	NA
7928491	4.7316	5.96016	6.58699	6.46693	MYST4	MYST histone acetyltransferase (monocytic leukemia) 4	23522	605880	10
7928516	4.80707	4.91904	5.53893	5.31504	SAMD8	sterile alpha motif domain containing 8	142891	611575	10
7928529	5.60405	4.90295	4.59198	4.89083	ZNF503	zinc finger protein 503	84858	NA	10
7928531	6.11525	5.44651	4.1688	5.32462	C10orf41	chromosome 10 open reading frame 41	100131213	NA	10, 10
7928551	8.7908	9.34323	10.2492	9.31773	RPS24	ribosomal protein S24	6229	602412, 610629	10, 10
7928556	5.18252	4.7868	4.20944	4.76105	---	---	NA	NA
7928589	5.12771	5.01225	5.21256	4.61375	PPIF	peptidylprolyl isomerase F	10105	604486	10
7928600	6.8264	6.82401	6.73318	6.4692	EIF5AL1	eukaryotic translation initiation factor 5A-like 1	143244	NA	10
7928630	6.95115	6.78032	6.70408	6.37695	EIF5AL1	eukaryotic translation initiation factor 5A-like 1	143244	NA	10
7928671	4.20491	5.39345	6.92767	5.25681	C10orf57	chromosome 10 open reading frame 57	80195	NA	10
7928679	5.44755	5.51841	4.8483	5.06521	PLAC9	placenta-specific 9	219348	NA	10
7928695	6.48516	7.40213	7.86339	7.00414	C10orf58	chromosome 10 open reading frame 58	84293	NA	10, 10
7928752	4.19173	5.53599	6.18233	5.43931	GHITM	growth hormone inducible transmembrane protein	27069	NA	10
7928770	6.21398	6.30362	7.48413	7.18908	PCDH21	protocadherin 21	92211	609502	10
7928800	5.90872	6.18735	7.25273	6.45682	KIAA1128	KIAA1128	54462	NA	10
7928821	4.32516	4.10532	6.29167	4.45204	---	---	NA	NA
7928855	3.61907	4.42351	5.6279	4.978	BMPR1A	bone morphogenetic protein receptor, type IA	657	158350, 174900, 601299, 610069, 612242	10
7928870	7.75255	7.24045	6.35777	7.14375	---	---	NA	NA
7928882	6.42679	7.89082	7.38615	7.78357	C10orf116	chromosome 10 open reading frame 116	10974	NA	10
7928890	6.06294	6.45505	7.14135	6.8005	AGAP11	ankyrin repeat and GTPase domain Arf GTPase activating protein 11	119385	NA	10
7928907	4.86022	6.47999	8.17597	7.7942	---	---	NA	NA
7928909	4.03135	4.18375	4.20063	4.33022	FAM35A	family with sequence similarity 35, member A	54537	NA	10
7928937	4.10854	4.00149	5.45743	4.41992	MINPP1	multiple inositol polyphosphate histidine phosphatase, 1	9562	188470, 605391	10
7928994	3.27573	2.85779	5.26059	2.90346	LIPK	lipase, family member K	643414	NA	10
7928999	4.0959	3.37751	5.66261	3.39378	LIPN	lipase, family member N	643418	NA	10
7929003	4.38807	3.68589	6.06166	4.01231	LIPM	lipase, family member M	340654	NA	10
7929078	3.57458	3.72164	4.46044	4.15434	KIF20B	kinesin family member 20B	9585	605498	10
7929114	5.87514	6.2079	6.53275	6.19635	LOC119358	similar to hCG2040270	NA	NA
7929116	4.02777	5.03627	5.86145	5.54532	RPP30	ribonuclease P/MRP 30kDa subunit	10556	606115	10, 10
7929132	3.92231	4.94422	6.09507	5.66195	PCGF5	polycomb group ring finger 5	84333	NA	10
7929168	5.22223	6.16813	7.32267	6.58517	TNKS2	tankyrase, TRF1-interacting ankyrin-related ADP-ribose polymerase 2	80351	607128	10
7929201	5.00518	6.27433	7.6113	7.19023	BTAF1	BTAF1 RNA polymerase II, B-TFIID transcription factor-associated, 170kDa (Mot1 homolog, S. cerevisiae)	9044	605191	10
7929256	3.26286	3.91632	4.22817	3.84179	---	---	NA	NA
7929288	4.04675	4.79724	5.39817	5.2482	EXOC6	exocyst complex component 6	54536	609672	10, 10
7929322	4.52999	3.8469	3.52212	3.82582	CYP26A1	cytochrome P450, family 26, subfamily A, polypeptide 1	1592	602239	10, 10
7929332	5.18443	4.40478	3.62371	4.20723	---	---	NA	NA
7929438	3.1655	3.30762	3.56947	3.89457	HELLS	helicase, lymphoid-specific	3070	603946	10
7929497	4.23577	3.95459	4.22657	4.01933	C10orf129	chromosome 10 open reading frame 129	142827	NA	10
7929511	4.76448	5.4738	5.59331	5.5755	ENTPD1	ectonucleoside triphosphate diphosphohydrolase 1	953	601752	10, 10
7929533	3.89844	3.25339	3.08741	3.05335	CC2D2B	coiled-coil and C2 domain containing 2B	387707	NA	10
7929562	3.41285	4.49675	5.36229	5.36702	ZNF518A	zinc finger protein 518A	9849	NA	10
7929593	9.42439	10.1391	10.488	10.0781	RPL13AP5	ribosomal protein L13a pseudogene 5	NA	NA
7929596	4.41332	5.1842	5.53389	5.26043	LCOR	ligand dependent nuclear receptor corepressor	84458	607698	10
7929624	6.25393	7.12734	7.62046	6.90254	PGAM1	phosphoglycerate mutase 1 (brain)	5223	172250	10
7929719	4.55782	4.90569	5.44163	5.15973	C10orf28	chromosome 10 open reading frame 28	27291	NA	10
7929768	5.85684	6.342	7.4065	7.03284	CUTC	cutC copper transporter homolog (E. coli)	51076	610101	10
7929814	4.29224	3.89268	3.5213	3.83475	---	---	NA	NA
7929816	5.5138	7.35247	6.80668	7.15259	SCD	stearoyl-CoA desaturase (delta-9-desaturase)	6319	604031	10
7929947	5.29855	4.58535	3.80404	4.28873	TLX1	T-cell leukemia homeobox 1	3195	186770	10
7929958	4.25669	5.15101	5.84699	5.30914	BTRC	beta-transducin repeat containing	8945	603482	10
7929976	5.28767	5.69487	6.16044	5.7066	RP11-529I10.4	deleted in a mouse model of primary ciliary dyskinesia	25911	NA	10
7930025	5.61929	5.21632	5.19674	4.88965	ELOVL3	elongation of very long chain fatty acids (FEN1/Elo2, SUR4/Elo3, yeast)-like 3	83401	611815	10
7930031	5.19265	5.91272	6.25994	5.8002	GBF1	golgi-specific brefeldin A resistant guanine nucleotide exchange factor 1	8729	603698	10
7930074	5.92099	5.47324	4.95084	5.45872	NFKB2	nuclear factor of kappa light polypeptide gene enhancer in B-cells 2 (p49/p100)	4791	164012	10, 10, 10
7930168	6.19612	5.64776	4.95035	5.53043	---	---	NA	NA
7930170	3.92502	3.89947	4.39908	3.93023	C10orf32	chromosome 10 open reading frame 32	119032	NA	10
7930181	3.59764	4.41134	4.93991	4.44384	AS3MT	arsenic (+3 oxidation state) methyltransferase	57412	611806	10
7930274	3.78142	4.44232	4.21149	4.14852	---	---	NA	NA
7930276	6.11668	7.19514	7.97554	7.514	SLK	STE20-like kinase (yeast)	9748	NA	10
7930304	5.91154	7.04132	7.13455	7.01692	GSTO1	glutathione S-transferase omega 1	9446	605482	10
7930380	5.19371	5.87303	7.16712	6.6298	ADD3	adducin 3 (gamma)	120	601568	10, 10
7930413	5.4332	4.83964	4.31152	4.58079	DUSP5	dual specificity phosphatase 5	1847	603069	10
7930422	6.06687	6.72141	7.90838	7.41994	SMC3	structural maintenance of chromosomes 3	9126	606062, 610759	10
7930450	5.0397	5.64973	5.80531	5.90279	---	---	NA	NA
7930454	6.94272	8.22215	9.64507	8.84667	PDCD4	programmed cell death 4 (neoplastic transformation inhibitor)	27250	608610	10
7930470	5.24997	6.49218	7.37032	6.76227	SHOC2	soc-2 suppressor of clear homolog (C. elegans)	8036	602775	10
7930498	4.35665	4.68626	4.81686	4.80904	ACSL5	acyl-CoA synthetase long-chain family member 5	51703	605677	10, 10, 10
7930524	6.05654	5.81296	5.21082	5.42061	VTI1A	vesicle transport through interaction with t-SNAREs homolog 1A (yeast)	143187	NA	10
7930537	5.97784	7.63799	7.73797	7.5504	TCF7L2	transcription factor 7-like 2 (T-cell specific, HMG-box)	6934	125853, 602228	10
7930593	4.88101	4.30715	4.03726	4.30831	C10orf81	chromosome 10 open reading frame 81	79949	NA	10
7930614	3.83948	5.07343	6.00375	5.61428	NHLRC2	NHL repeat containing 2	374354	NA	10
7930682	5.11429	5.61105	6.16849	6.07737	FAM160B1	family with sequence similarity 160, member B1	57700	NA	10, 10
7930760	3.91893	4.9281	5.7268	4.26248	PNLIPRP3	pancreatic lipase-related protein 3	119548	NA	10
7930804	5.02764	4.47053	4.0176	4.41776	PNLIPRP2	pancreatic lipase-related protein 2	5408	604423	10
7930870	4.36405	5.67305	6.14814	5.54714	TOMM22	translocase of outer mitochondrial membrane 22 homolog (yeast)	56993	607046	22
7930880	5.54185	6.09607	6.07621	6.08072	---	---	NA	NA
7930882	4.4841	5.71286	6.81345	5.91509	FAM45A	family with sequence similarity 45, member A	404636	NA	10
7930927	4.7089	5.16112	5.75045	5.55421	INPP5F	inositol polyphosphate-5-phosphatase F	22876	609389	10, 10, 10
7930956	4.33132	5.07257	6.15104	5.80038	SEC23IP	SEC23 interacting protein	11196	NA	10
7930996	4.74236	5.26042	5.93039	5.77006	BRWD2	bromodomain and WD repeat domain containing 2	55717	137800, 606417	10
7931029	2.63527	3.5411	4.3931	4.61119	---	---	NA	NA
7931079	5.85327	5.14272	4.36263	4.75097	---	---	NA	NA
7931081	4.85167	6.17721	7.56238	6.95568	PLEKHA1	pleckstrin homology domain containing, family A (phosphoinositide binding specific) member 1	59338	603075, 607772	10, 10
7931108	5.16448	4.39722	4.06596	4.31809	DMBT1	deleted in malignant brain tumors 1	1755	137800, 155255, 601969	10
7931152	4.44911	3.86562	3.63987	3.85958	---	---	NA	NA
7931168	4.60172	5.44421	6.17834	5.57664	ACADSB	acyl-Coenzyme A dehydrogenase, short/branched chain	36	600301, 610006	10
7931187	4.72081	5.98681	6.72311	6.17179	BUB3	budding uninhibited by benzimidazoles 3 homolog (yeast)	9184	603719	10
7931216	5.28927	5.58387	6.13495	5.91139	FAM175B	family with sequence similarity 175, member B	23172	611144	10
7931226	5.05745	5.71685	6.9677	6.2489	ZRANB1	zinc finger, RAN-binding domain containing 1	54764	611749	10
7931268	5.2091	5.7371	6.93812	5.90626	BCCIP	BRCA2 and CDKN1A interacting protein	56647	611883	10, 10, 10
7931281	4.01787	4.32905	4.8245	4.46161	FANK1	fibronectin type III and ankyrin repeat domains 1	92565	611640	10
7931293	5.15621	6.34379	7.16104	6.91196	DOCK1	dedicator of cytokinesis 1	1793	601403	10
7931346	2.70157	3.13981	5.21882	4.33721	---	---	NA	NA
7931348	6.47657	5.78928	5.38352	5.50293	FOXI2	forkhead box I2	399823	NA	10
7931473	4.57357	3.90222	3.31178	3.72299	C10orf91	chromosome 10 open reading frame 91	170393	NA	10
7931500	6.14754	5.4547	4.89418	5.36558	GPR123	G protein-coupled receptor 123	84435	612302	10
7931556	5.77635	5.18554	4.73996	4.8666	VENTX	VENT homeobox homolog (Xenopus laevis)	27287	607158	10
7931681	7.33833	6.26935	5.97479	6.44733	---	---	NA	NA
7931726	5.5053	5.76857	5.43791	5.96601	---	---	NA	NA
7931728	4.73616	6.03471	6.44423	6.13979	LARP5	La ribonucleoprotein domain family, member 5	23185	NA	10
7931754	3.91181	3.84044	4.6872	3.84946	IDI1	isopentenyl-diphosphate delta isomerase 1	3422	604055	10
7931778	6.18317	6.96469	7.1882	6.87586	PITRM1	pitrilysin metallopeptidase 1	10531	NA	10
7931832	5.57172	6.92929	6.99211	6.87626	AKR1C2	aldo-keto reductase family 1, member C2 (dihydrodiol dehydrogenase 2; bile acid binding protein; 3-alpha hydroxysteroid dehydrogenase, type III)	1646	600450	10
7931859	6.45454	7.38875	8.26191	6.78489	CALML5	calmodulin-like 5	51806	605183	10
7931873	5.35689	6.47674	7.65972	6.89978	GDI2	GDP dissociation inhibitor 2	2665	600767	10
7931914	5.20371	4.46676	4.24526	4.38736	IL2RA	interleukin 2 receptor, alpha	3559	147730, 601942, 606367	10
7931977	4.91152	6.02858	5.92825	6.05648	ITIH5	inter-alpha (globulin) inhibitor H5	80760	609783	10, 10, 10
7932017	4.03253	4.3424	3.66549	4.96735	---	---	NA	NA
7932023	4.99333	5.38842	6.38337	5.64986	USP6NL	USP6 N-terminal like	9712	605405	10, 10
7932041	4.86964	5.77666	6.60541	6.18255	UPF2	UPF2 regulator of nonsense transcripts homolog (yeast)	26019	605529	10, 10
7932069	3.17567	4.21906	5.17753	3.90175	NUDT5	nudix (nucleoside diphosphate linked moiety X)-type motif 5	11164	609230	10
7932082	5.27311	5.81165	6.77231	6.42954	CCDC3	coiled-coil domain containing 3	83643	NA	10
7932086	4.908	4.75872	4.67774	5.01914	---	---	NA	NA
7932109	5.79858	5.808	5.92447	5.71586	SEPHS1	selenophosphate synthetase 1	22929	600902	10
7932209	4.82518	5.41081	5.07937	5.22834	---	---	NA	NA
7932211	4.50399	3.46909	3.72295	3.63336	---	---	NA	NA
7932227	5.05735	6.06696	6.19672	5.87324	NMT2	N-myristoyltransferase 2	9397	603801	10
7932254	4.42769	4.44127	4.91153	5.41775	ITGA8	integrin, alpha 8	8516	604063	10
7932285	3.82497	4.77554	5.67152	5.46819	C10orf97	chromosome 10 open reading frame 97	80013	611649	10
7932311	5.93717	6.82924	7.595	6.9511	RSU1	Ras suppressor protein 1	6251	179555	10
7932433	4.74408	5.0616	5.63129	5.57891	NSUN6	NOL1/NOP2/Sun domain family, member 6	221078	NA	10
7932453	5.28752	5.7807	6.11316	6.19676	NEBL	nebulette	10529	605491	10, 10
7932498	5.20676	4.83199	4.54454	4.52279	C10orf140	chromosome 10 open reading frame 140	387640	NA	10
7932508	3.37757	2.98412	3.33702	3.56232	---	---	NA	NA
7932510	5.71234	5.80436	6.63877	5.96908	---	---	NA	NA
7932512	5.82047	6.58292	6.72312	6.76101	DNAJC1	DnaJ (Hsp40) homolog, subfamily C, member 1	64215	611207	10
7932530	4.54288	5.32146	5.62928	5.50211	PIP4K2A	phosphatidylinositol-5-phosphate 4-kinase, type II, alpha	5305	603140	10
7932548	3.5752	3.82399	4.30987	4.37269	---	---	NA	NA
7932550	5.3224	4.36217	3.7505	4.24346	---	---	NA	NA
7932552	5.04545	5.25305	5.69276	6.02038	LOC100128663	similar to PRO3077	100128663	NA
7932554	5.06702	6.37893	6.52053	6.51173	ARHGAP21	Rho GTPase activating protein 21	57584	609870	10
7932612	6.99068	5.88984	4.8032	5.63782	---	---	NA	NA
7932616	4.72687	6.25189	7.65476	6.77419	ABI1	abl-interactor 1	10006	603050	10
7932635	3.75218	3.99782	5.35742	4.78999	---	---	NA	NA
7932637	4.26276	4.85286	5.29612	5.38989	ANKRD26	ankyrin repeat domain 26	22852	610855	10
7932678	4.88394	6.56318	7.77671	6.95698	YME1L1	YME1-like 1 (S. cerevisiae)	10730	607472	10
7932703	4.29971	5.198	6.59541	5.5252	ACBD5	acyl-Coenzyme A binding domain containing 5	91452	NA	10, 10
7932721	4.02963	3.23392	3.05328	3.27875	LOC387646	leucine rich repeat containing 37, member A family pseudogene	387646	NA	10
7932765	4.73266	5.33725	6.19044	5.78806	MPP7	membrane protein, palmitoylated 7 (MAGUK p55 subfamily member 7)	143098	610973	10
7932786	3.95235	3.94578	3.3059	3.79305	---	---	NA	NA
7932792	5.01719	4.4684	4.54647	4.77147	---	---	NA	NA
7932796	6.15456	6.98229	6.94019	7.23138	SVIL	supervillin	6840	604126	10, 10
7932862	7.27953	6.4274	5.78482	6.27101	---	---	NA	NA
7932881	5.52145	5.39617	4.63048	5.25028	LOC390414	hypothetical LOC390414	390414	NA
7932883	6.79591	6.20608	5.07284	5.49569	---	---	NA	NA
7932885	4.01667	5.98692	6.93191	6.62661	ARHGAP12	Rho GTPase activating protein 12	94134	610577	10
7932911	5.5013	7.15864	8.2466	7.6992	KIF5B	kinesin family member 5B	3799	602809	10
7932938	5.61701	6.32744	6.77454	6.7319	EPC1	enhancer of polycomb homolog 1 (Drosophila)	80314	610999	10
7932962	4.64557	4.08341	3.56285	3.90345	---	---	NA	NA
7932964	3.54558	4.65072	5.25887	5.18532	C1D	C1D nuclear receptor co-repressor	10438	606997	2
7932966	4.81645	6.3351	6.65016	6.7799	ITGB1	integrin, beta 1 (fibronectin receptor, beta polypeptide, antigen CD29 includes MDF2, MSK12)	3688	135630	10, 10, 10, 10
7932985	4.40482	5.53333	5.88023	5.9417	NRP1	neuropilin 1	8829	602069	10, 10
7933008	4.61978	4.72302	5.13297	4.81758	---	---	NA	NA
7933010	5.74408	6.48759	7.3967	6.90046	PARD3	par-3 partitioning defective 3 homolog (C. elegans)	56288	606745	10
7933045	3.1214	2.60705	3.97814	3.10686	---	---	NA	NA
7933047	4.11495	4.69132	5.49978	4.89912	CUL2	cullin 2	8453	603135	10
7933071	3.3729	3.42752	3.88337	3.67637	---	---	NA	NA
7933080	6.97886	6.37773	5.76272	5.72229	---	---	NA	NA
7933084	4.86737	5.26606	6.5621	5.57975	NAMPT	nicotinamide phosphoribosyltransferase	10135	608764	7
7933105	4.96265	5.3697	5.70141	5.96831	ZNF25	zinc finger protein 25	219749	194528	10
7933113	6.00076	6.87084	7.54737	7.67936	---	---	NA	NA
7933115	4.7375	5.83959	6.68834	6.50503	CDC10L	CDC10 cell division cycle 10 homolog (S. cerevisiae)-like	285961	NA	10
7933145	4.83741	6.44723	7.39891	7.11867	---	---	NA	NA
7933147	5.25373	4.71116	4.26978	4.79526	---	---	NA	NA
7933149	5.47525	4.69155	4.22203	4.5014	RASGEF1A	RasGEF domain family, member 1A	221002	NA	10
7933164	5.56377	6.04434	6.59823	6.19048	HNRNPF	heterogeneous nuclear ribonucleoprotein F	3185	601037	10, 10, 10, 10, 10, 10
7933178	6.36334	6.267	5.51348	5.97979	---	---	NA	NA
7933194	5.35548	5.70883	7.26347	6.85369	CXCL12	chemokine (C-X-C motif) ligand 12 (stromal cell-derived factor 1)	6387	600835, 609423	10, 10, 10
7933219	4.78304	4.05471	3.70946	3.88114	OR13A1	olfactory receptor, family 13, subfamily A, member 1	79290	NA	10
7933252	5.28492	6.58	6.6744	6.87632	AGAP8	ArfGAP with GTPase domain, ankyrin repeat and PH domain 8	728404	NA	10
7933290	5.83346	6.75629	6.88317	7.00065	BMS1P5	BMS1 pseudogene 5	399761	NA	10
7933312	6.77809	6.8807	7.71272	7.09667	ANXA8L1	annexin A8-like 1	728113	NA	10, 10
7933327	9.10883	8.95256	11.0923	9.43317	FAM25B	family with sequence similarity 25, member B	100132929	NA	10, 10, 10
7933331	5.72745	7.07774	7.20248	7.33181	AGAP8	ArfGAP with GTPase domain, ankyrin repeat and PH domain 8	728404	NA	10
7933405	5.38917	6.45325	6.61489	6.79102	AGAP8	ArfGAP with GTPase domain, ankyrin repeat and PH domain 8	728404	NA	10
7933413	5.35156	6.31573	6.53355	6.58413	BMS1P5	BMS1 pseudogene 5	399761	NA	10
7933423	9.10883	8.95256	11.0923	9.43317	FAM25B	family with sequence similarity 25, member B	100132929	NA	10, 10, 10
7933427	5.64812	6.6855	6.78097	6.96245	AGAP8	ArfGAP with GTPase domain, ankyrin repeat and PH domain 8	728404	NA	10
7933437	3.80467	3.58466	4.17493	3.93724	PTPN20B	protein tyrosine phosphatase, non-receptor type 20B	26095	610631	10, 10, 10, 10, 10, 10
7933501	6.09172	5.40776	4.8808	5.28687	DRGX	dorsal root ganglia homeobox	644168	606701	10
7933509	4.95071	5.76248	5.94184	5.89725	ERCC6	excision repair cross-complementing rodent repair deficiency, complementation group 6	2074	133540, 211980, 214150, 278800, 600630, 609413	10
7933535	5.48581	4.5839	3.87261	4.26552	---	---	NA	NA
7933561	3.38454	3.90002	5.26653	4.0696	PARG	poly (ADP-ribose) glycohydrolase	8505	603501	10
7933574	5.32229	6.53794	6.64491	6.80488	AGAP7	ArfGAP with GTPase domain, ankyrin repeat and PH domain 7	653268	NA	10
7933582	4.90485	6.35401	7.68729	7.0199	TIMM23	translocase of inner mitochondrial membrane 23 homolog (yeast)	10431	605034	10
7933619	4.74634	4.97866	5.83799	5.33033	SGMS1	sphingomyelin synthase 1	259230	611573	10
7933638	5.36192	4.05594	3.71105	4.39859	FLJ31958	hypothetical protein FLJ31958	143153	NA
7933665	4.58463	3.39647	3.25778	3.39913	MBL2	mannose-binding lectin (protein C) 2, soluble (opsonic defect)	4153	154545	10
7933733	4.31367	5.3176	5.24933	5.53667	FAM13C	family with sequence similarity 13, member C	220965	NA	10, 10
7933760	5.8836	7.17852	7.9839	7.34088	CCDC6	coiled-coil domain containing 6	8030	188550, 601985	10
7933772	4.57468	5.25482	6.29062	5.63021	ANK3	ankyrin 3, node of Ranvier (ankyrin G)	288	600465	10, 10
7933872	6.15726	6.28678	7.17234	6.21679	EGR2	early growth response 2 (Krox-20 homolog, Drosophila)	1959	129010, 145900, 605253, 607678	10, 10
7933877	4.10979	5.11805	6.64902	5.92695	JMJD1C	jumonji domain containing 1C	221037	604503	10, 10
7933931	6.83706	6.34548	5.21981	5.84183	---	---	NA	NA
7933933	4.6765	3.79899	3.64204	3.858	DNAJC12	DnaJ (Hsp40) homolog, subfamily C, member 12	56521	606060	10, 10
7933945	7.38956	7.05088	6.26776	7.06008	---	---	NA	NA
7933947	3.22286	4.52475	6.14087	5.55528	HERC4	hect domain and RLD 4	26091	609248	10
7933976	6.90979	8.25984	8.46613	8.52477	---	---	NA	NA
7933978	5.14861	4.21226	3.8034	4.11728	ATOH7	atonal homolog 7 (Drosophila)	220202	609875	10
7933999	5.1426	5.96994	6.55003	6.43783	RUFY2	RUN and FYVE domain containing 2	55680	610328	10, 10
7934083	5.48091	4.84854	4.20033	4.57871	NEUROG3	neurogenin 3	50674	604882, 610370	10
7934101	4.66672	5.03854	4.22161	4.61108	AIFM2	apoptosis-inducing factor, mitochondrion-associated, 2	84883	605159	10
7934122	5.10186	6.81053	7.695	6.99145	SAR1A	SAR1 homolog A (S. cerevisiae)	56681	607691	10
7934133	5.82572	6.76299	7.81701	6.81112	PPA1	pyrophosphatase (inorganic) 1	5464	179030	10
7934141	5.25898	4.61235	4.24228	4.48549	NPFFR1	neuropeptide FF receptor 1	64106	607448	10
7934196	5.67399	7.30914	7.71509	7.08772	PSAP	prosaposin	5660	176801, 249900, 610539, 611721, 611722	10
7934228	4.09269	4.42725	5.10653	4.53975	ASCC1	activating signal cointegrator 1 complex subunit 1	51008	NA	10
7934255	5.00917	5.4669	5.73432	5.55458	CBARA1	calcium binding atopy-related autoantigen 1	10367	605084	10
7934269	5.26213	4.12832	4.09909	4.03977	---	---	NA	NA
7934278	3.72253	4.10165	4.87153	4.70247	P4HA1	prolyl 4-hydroxylase, alpha polypeptide I	5033	176710	10
7934297	5.269	5.54721	5.61488	6.10098	---	---	NA	NA
7934301	4.78535	5.88466	6.66494	6.11155	ECD	ecdysoneless homolog (Drosophila)	11319	NA	10
7934367	5.25958	6.33021	7.48068	6.71311	ANXA7	annexin A7	310	186360	10
7934393	3.33713	4.59	5.79185	5.31124	PPP3CB	protein phosphatase 3 (formerly 2B), catalytic subunit, beta isoform	5532	114106	10
7934442	4.69294	4.11707	3.67444	4.14814	SYNPO2L	synaptopodin 2-like	79933	NA	10, 10
7934451	5.35498	6.47153	6.59179	6.79705	AGAP7	ArfGAP with GTPase domain, ankyrin repeat and PH domain 7	653268	NA	10
7934459	5.82792	6.39908	6.40222	6.31539	NDST2	N-deacetylase/N-sulfotransferase (heparan glucosaminyl) 2	8509	603268	10
7934513	4.61484	5.69988	6.61823	6.04693	AP3M1	adaptor-related protein complex 3, mu 1 subunit	26985	610366	10
7934566	6.39434	5.73922	5.04507	5.78632	---	---	NA	NA
7934651	4.85479	4.62009	4.53216	4.62682	---	---	NA	NA
7934706	4.76252	5.68688	6.86748	5.99758	---	---	NA	NA
7934717	4.76252	5.68688	6.86748	5.99758	---	---	NA	NA
7934753	7.11975	6.89058	6.65316	6.47027	EIF5AL1	eukaryotic translation initiation factor 5A-like 1	143244	NA	10
7934783	4.8397	4.04037	3.79336	4.02455	LRIT1	leucine-rich repeat, immunoglobulin-like and transmembrane domains 1	26103	NA	10
7934810	5.85262	5.04083	4.43863	4.88324	---	---	NA	NA
7934812	5.70426	6.58466	7.44469	6.9801	WAPAL	wings apart-like homolog (Drosophila)	23063	610754	10
7934852	4.42859	6.23091	7.67388	6.81622	GLUD1	glutamate dehydrogenase 1	2746	138130, 606762	10
7934870	3.73961	4.91414	5.81297	5.02322	ATAD1	ATPase family, AAA domain containing 1	84896	NA	10
7934896	7.00851	6.1154	5.72857	6.31158	---	---	NA	NA
7934898	4.26898	4.0585	6.55275	4.51577	ANKRD22	ankyrin repeat domain 22	118932	NA	10
7934906	6.88502	8.84827	8.6515	9.23724	ACTA2	actin, alpha 2, smooth muscle, aorta	59	102620, 611788	10, 10
7934959	5.01426	4.83759	4.32019	4.81602	hsa-mir-107 /// AF480550	hsa-mir-107 /// AF480550	NA	NA
7934970	5.736	5.18092	4.69633	4.96488	HTR7	5-hydroxytryptamine (serotonin) receptor 7 (adenylate cyclase-coupled)	3363	182137	10
7934997	5.31896	5.9888	6.36782	6.13633	PPP1R3C	protein phosphatase 1, regulatory (inhibitor) subunit 3C	5507	602999	10
7935002	5.36695	6.92371	7.4554	7.04864	SRP9	signal recognition particle 9kDa	6726	600707	1
7935027	4.65871	5.00174	7.44728	5.15205	IDE	insulin-degrading enzyme	3416	146680	10
7935058	6.1317	6.94462	8.25791	7.49839	MYOF	myoferlin	26509	604603	10
7935114	5.53487	4.64637	3.98332	4.9129	---	---	NA	NA
7935116	3.69504	5.39238	4.28685	4.86256	RBP4	retinol binding protein 4, plasma	5950	180250	10
7935123	5.93508	6.00029	6.07488	6.22565	C10orf4	chromosome 10 open reading frame 4	118924	608866	10
7935142	6.57562	5.81561	5.9167	5.81629	---	---	NA	NA
7935146	4.0037	4.42541	5.45436	5.00425	NOC3L	nucleolar complex associated 3 homolog (S. cerevisiae)	64318	610769	10
7935180	6.33924	7.43286	8.07773	7.5792	PDLIM1	PDZ and LIM domain 1	9124	605900	10
7935188	4.73171	6.2472	6.23083	6.34598	SORBS1	sorbin and SH3 domain containing 1	10580	605264	10, 10
7935228	3.35416	5.65028	6.04111	6.07334	---	---	NA	NA
7935230	4.13688	4.6146	4.94137	4.48609	ALDH18A1	aldehyde dehydrogenase 18 family, member A1	5832	138250	10
7935320	5.34663	6.52591	7.66194	6.9306	TM9SF3	transmembrane 9 superfamily member 3	56889	NA	10
7935359	3.54894	3.93051	5.44839	4.79928	---	---	NA	NA
7935403	4.44508	4.58324	5.43923	4.96675	ARHGAP19	Rho GTPase activating protein 19	84986	611587	10
7935425	5.42095	4.93528	4.52174	4.85794	RRP12	ribosomal RNA processing 12 homolog (S. cerevisiae)	23223	NA	10
7935462	4.45907	5.01552	5.31146	4.79978	EXOSC1	exosome component 1	51013	606493	10
7935627	4.68413	5.85701	5.78603	5.44455	GOT1	glutamic-oxaloacetic transaminase 1, soluble (aspartate aminotransferase 1)	2805	138180	10
7935692	4.58755	5.92301	7.08058	6.11203	ERLIN1	ER lipid raft associated 1	10613	611604	10, 10
7935707	2.89274	3.57487	4.58685	3.85401	CHUK	conserved helix-loop-helix ubiquitous kinase	1147	600664	10
7935776	6.04453	8.78804	9.19265	9.29744	SCD	stearoyl-CoA desaturase (delta-9-desaturase)	6319	604031	10
7935810	6.11768	7.35333	7.33585	7.02834	NDUFB8	NADH dehydrogenase (ubiquinone) 1 beta subcomplex, 8, 19kDa	4714	602140	10
7935834	5.6591	4.82711	4.55729	4.78519	PDZD7	PDZ domain containing 7	NA	NA	NA
7935855	6.01639	5.30979	4.7043	4.84155	LBX1	ladybird homeobox 1	10660	604255	10
7935861	3.55778	4.74936	5.80742	5.77258	---	---	NA	NA
7935863	4.51588	4.74576	5.42764	5.08882	---	---	NA	NA
7935910	5.50846	6.92658	8.09543	7.71152	MGEA5	meningioma expressed antigen 5 (hyaluronidase)	10724	604039	10
7935930	4.72902	5.03127	4.59846	5.04851	KCNIP2	Kv channel interacting protein 2	30819	604661	10, 10, 10
7935968	5.57196	6.81261	7.2468	7.37726	LDB1	LIM domain binding 1	8861	603451	10, 10
7935983	5.90377	5.13717	4.62239	5.03541	PITX3	paired-like homeodomain 3	5309	107250, 602669, 610623	10
7936023	6.91116	6.2848	5.85966	6.10112	C10orf95	chromosome 10 open reading frame 95	79946	NA	10
7936041	6.14155	6.83376	7.36195	7.05642	ARL3	ADP-ribosylation factor-like 3	403	604695	10
7936062	8.09367	7.37655	6.89446	7.29197	---	---	NA	NA
7936064	3.69795	5.19537	5.66672	5.3182	NT5C2	5'-nucleotidase, cytosolic II	22978	600417	10
7936091	5.1086	7.66216	8.90829	8.01461	USMG5	up-regulated during skeletal muscle growth 5 homolog (mouse)	84833	NA	10
7936111	5.19206	4.38771	4.11585	4.29925	CALHM3	calcium homeostasis modulator 3	119395	NA	10
7936284	5.14425	5.89035	6.24059	6.04608	XPNPEP1	X-prolyl aminopeptidase (aminopeptidase P) 1, soluble	7511	602443	10
7936307	5.70414	6.42167	6.9459	6.62324	SMNDC1	survival motor neuron domain containing 1	10285	603519	10
7936322	2.99309	4.40831	4.72598	5.23503	GPAM	glycerol-3-phosphate acyltransferase, mitochondrial	57678	602395	10
7936346	5.15856	6.09299	6.67518	6.64214	ZDHHC6	zinc finger, DHHC-type containing 6	64429	NA	10
7936406	6.18996	5.74963	5.93257	5.97967	---	---	NA	NA
7936419	5.87364	7.02523	8.03907	7.4967	C10orf118	chromosome 10 open reading frame 118	55088	NA	10
7936463	6.00068	6.48949	7.22808	6.66031	ABLIM1	actin binding LIM protein 1	3983	602330	10, 10, 10
7936507	5.3254	4.92427	4.50403	4.96123	C10orf82	chromosome 10 open reading frame 82	143379	NA	10
7936529	6.3538	7.08492	7.67182	7.37553	KIAA1598	KIAA1598	57698	611171	10
7936552	4.90829	4.21554	3.84237	4.12388	VAX1	ventral anterior homeobox 1	11023	604294	10, 10
7936567	5.78994	6.33394	6.8144	6.8518	RAB11FIP2	RAB11 family interacting protein 2 (class I)	22841	608599	10
7936576	4.33741	3.68098	3.33332	3.51597	---	---	NA	NA
7936578	5.74906	6.49492	6.98638	6.70719	C10orf84	chromosome 10 open reading frame 84	63877	NA	10
7936590	4.37916	3.69873	3.44997	3.33675	PRLHR	prolactin releasing hormone receptor	2834	600895	10
7936614	7.35055	8.15267	8.80535	8.39722	EIF3A	eukaryotic translation initiation factor 3, subunit A	8661	602039	10
7936661	4.78732	5.60431	6.22914	5.48332	PRDX3	peroxiredoxin 3	10935	604769	10
7936683	4.90926	5.36335	6.63807	6.01478	TIAL1	TIA1 cytotoxic granule-associated RNA binding protein-like 1	7073	603413	10
7936706	4.61796	5.24722	6.04852	5.7129	C10orf119	chromosome 10 open reading frame 119	79892	610909	10
7936727	8.8737	9.3967	10.1631	9.53995	RPL21	ribosomal protein L21	6144	603636	13
7936734	5.16016	6.35025	7.13341	6.79413	FGFR2	fibroblast growth factor receptor 2	2263	101200, 101400, 101600, 123150, 123500, 123790, 137215, 149730, 176943, 207410, 609579	10, 10, 10, 10, 10, 10, 10
7936762	4.83115	5.04294	5.77617	5.25584	ATE1	arginyltransferase 1	11101	607103	10
7936793	4.51613	3.83775	3.49208	3.66087	C10orf120	chromosome 10 open reading frame 120	399814	NA	10
7936817	3.89877	4.14301	4.63341	4.55315	C10orf88	chromosome 10 open reading frame 88	80007	NA	10
7936826	3.55796	3.92424	5.44609	4.46599	IKZF5	IKAROS family zinc finger 5 (Pegasus)	64376	606238	10
7936833	5.49593	5.37714	6.06548	5.44572	---	---	NA	NA
7936856	6.21199	5.67399	5.02175	5.57544	GALNAC4S-6ST	B cell RAG associated protein	51363	608277	10
7936871	5.189	5.8381	6.92895	6.14577	OAT	ornithine aminotransferase (gyrate atrophy)	4942	258870	10
7936891	4.49404	4.92566	5.60216	5.23127	METTL10	methyltransferase like 10	399818	NA	10
7936902	3.05861	3.11259	3.64669	3.5224	---	---	NA	NA
7936937	5.07703	5.87525	5.93732	5.54738	UROS	uroporphyrinogen III synthase	7390	263700, 606938	10
7936949	4.52526	5.5772	6.6768	5.89514	DHX32	DEAH (Asp-Glu-Ala-His) box polypeptide 32	55760	607960	10
7936996	4.4405	3.56314	3.29812	3.47802	C10orf90	chromosome 10 open reading frame 90	118611	NA	10
7937014	6.47653	5.44647	5.03797	5.29832	LOC387720	hypothetical gene supported by AK127642	387720	NA
7937079	5.61155	6.47122	6.88752	6.02437	BNIP3	BCL2/adenovirus E1B 19kDa interacting protein 3	664	603293	10
7937104	5.73989	5.20484	5.27184	5.18101	LOC100128830	hypothetical protein LOC100128830	100128830	NA
7937106	5.5785	5.11089	4.41942	4.78065	NKX6-2	NK6 homeobox 2	84504	605955	10
7937247	6.56795	6.06072	5.49907	5.96653	SYCE1	synaptonemal complex central element protein 1	93426	611486	10, 10, 10
7937251	4.79469	4.17638	3.95536	3.96204	FRG2B	FSHD region gene 2 family, member B	441581	NA	10
7937287	5.15545	5.88994	6.05708	6.01523	PSMD13	proteasome (prosome, macropain) 26S subunit, non-ATPase, 13	5719	603481	11
7937305	6.34139	5.59359	5.24173	5.50214	NLRP6	NLR family, pyrin domain containing 6	171389	609650	11
7937330	7.02979	7.72757	7.68196	7.76677	IFITM2	interferon induced transmembrane protein 2 (1-8D)	10581	605578	11
7937335	5.68939	6.62027	7.04192	6.80502	IFITM1	interferon induced transmembrane protein 1 (9-27)	8519	604456	11
7937404	5.2452	5.68173	5.40887	5.92241	LOC692247	hypothetical locus LOC692247	692247	NA
7937433	6.64677	6.08045	5.61005	5.78988	DRD4	dopamine receptor D4	1815	126452, 143465, 168600, 601696	11
7937465	6.24264	7.66757	7.81033	6.94697	TALDO1	transaldolase 1	6888	602063, 606003	11
7937476	9.83253	10.6479	10.5922	10.4405	RPLP2	ribosomal protein, large, P2	6181	180530	11
7937508	4.94942	5.66727	5.57502	5.32111	CD151	CD151 molecule (Raph blood group)	977	179620, 602243, 609057	11
7937696	4.74198	4.43561	4.86359	4.31799	LOC338651	hypothetical protein LOC338651	338651	NA	11
7937728	6.29144	6.79738	6.536	7.225	TNNI2	troponin I type 2 (skeletal, fast)	7136	191043, 601680	11
7937749	7.1396	6.78396	6.01735	6.5369	TNNT3	troponin T type 3 (skeletal, fast)	7140	600692, 601680	11
7937763	7.3835	7.15425	6.48305	6.8138	MRPL23	mitochondrial ribosomal protein L23	6150	600789	11
7937772	4.37114	6.99787	6.34511	7.03096	IGF2	insulin-like growth factor 2 (somatomedin A)	3481	147470	11, 11, 11
7937774	5.94379	5.16879	4.92119	5.09461	IGF2AS	insulin-like growth factor 2 antisense	51214	610146	11
7937802	6.10083	7.36519	7.53194	7.0292	CD81	CD81 molecule	975	186845	11
7937823	5.23661	4.55576	4.21284	4.44435	KCNQ1	potassium voltage-gated channel, KQT-like subfamily, member 1	3784	192500, 220400, 607542, 607554, 609621	11, 11
7937866	4.8765	5.33124	5.46632	5.39075	---	---	NA	NA
7937878	4.71164	4.10578	3.72798	4.04332	TRPC2	transient receptor potential cation channel, subfamily C, member 2 (pseudogene)	7221	NA	11
7937892	4.89414	5.47203	5.77692	5.20136	FRAG1	FGF receptor activating protein 1	27315	NA	11, 11, 11, 11, 11, 11
7937915	4.02936	5.07046	6.20702	5.21488	RRM1	ribonucleotide reductase M1	6240	180410	11
7937934	4.20547	3.4281	3.01174	3.57253	hCG_1651160	Ssu72 RNA polymerase II CTD phosphatase-like	136157	NA	7
7937942	4.09473	3.38594	3.1982	3.12217	OR52K1	olfactory receptor, family 52, subfamily K, member 1	390036	NA	11
7937944	5.03645	4.51479	4.0824	4.38765	OR52M1	olfactory receptor, family 52, subfamily M, member 1	119772	NA	11
7937957	4.82184	4.15613	3.80246	4.08045	---	---	NA	NA
7937973	4.86211	4.07207	3.60352	3.82392	OR51F2	olfactory receptor, family 51, subfamily F, member 2	119694	NA	11
7937990	4.39464	3.38347	3.63041	3.14915	HBG2 /// HBG1	hemoglobin, gamma G /// hemoglobin, gamma A	NA	NA
7937993	4.39464	3.38347	3.63041	3.14915	HBG2 /// HBG1	hemoglobin, gamma G /// hemoglobin, gamma A	NA	NA
7938000	4.12939	3.33605	3.38705	3.49824	OR51M1	olfactory receptor, family 51, subfamily M, member 1	390059	NA	11
7938010	4.61648	4.3263	4.02161	4.65743	OR52B6	olfactory receptor, family 52, subfamily B, member 6	340980	NA	11
7938035	5.34212	6.19465	6.46178	6.64484	TRIM22	tripartite motif-containing 22	10346	606559	11
7938072	4.95346	3.63915	3.59132	3.83646	OR56B4	olfactory receptor, family 56, subfamily B, member 4	196335	NA	11
7938074	4.85214	3.86293	3.6696	3.82266	---	---	NA	NA
7938078	4.3921	3.91328	3.15538	3.62057	C11orf42	chromosome 11 open reading frame 42	160298	NA	11
7938154	5.07753	6.52088	6.4742	6.57953	ILK	integrin-linked kinase	3611	602366	11, 11
7938208	6.70413	5.9782	5.64143	5.8637	RBMXL2	RNA binding motif protein, X-linked-like 2	27288	605444	11
7938225	3.10407	3.51702	5.05825	4.2365	OLFML1	olfactomedin-like 1	283298	NA	11
7938231	5.15594	6.02433	6.3732	6.20974	PPFIBP2	PTPRF interacting protein, binding protein 2 (liprin beta 2)	8495	603142	11
7938261	4.55366	4.39651	5.30773	4.70784	OR5E1P	olfactory receptor, family 5, subfamily E, member 1 pseudogene	26343	NA
7938263	5.58096	5.8473	6.85193	5.96891	EIF3F	eukaryotic translation initiation factor 3, subunit F	8665	603914	11
7938286	6.42699	7.50663	8.02067	7.51823	RPL27A	ribosomal protein L27a	6157	603637	11
7938293	5.99223	6.3932	6.86903	6.7569	SNORA45	small nucleolar RNA, H/ACA box 45	677826	611333	11
7938295	4.97606	4.88521	4.88938	4.71771	RPL27A	ribosomal protein L27a	NA	NA	NA
7938299	4.57794	4.55561	4.46573	4.7825	---	---	NA	NA
7938313	3.66428	4.79886	6.22519	5.60826	IPO7	importin 7	10527	605586	11
7938329	5.06616	4.50223	4.34204	4.31874	SNORA23	small nucleolar RNA, H/ACA box 23	677808	NA	11
7938331	3.86838	4.62682	5.29712	4.65192	ZNF143	zinc finger protein 143	7702	603433	11
7938348	4.68018	4.90259	5.89995	5.30951	WEE1	WEE1 homolog (S. pombe)	7465	193525	11, 11
7938364	4.3517	4.34036	5.85474	5.60484	WEE1	WEE1 homolog (S. pombe)	7465	193525	11, 11
7938366	4.03688	5.09206	7.0431	6.52981	WEE1	WEE1 homolog (S. pombe)	7465	193525	11, 11
7938368	7.23589	7.79878	7.77931	7.83382	RPL21P97	ribosomal protein L21 pseudogene 97	387753	NA
7938370	6.16937	7.3569	7.84641	7.55395	SWAP70	SWAP-70 protein	23075	604762	11
7938388	4.63337	4.18122	4.12983	4.06987	---	---	NA	NA
7938420	5.6056	4.89172	4.48571	4.83474	---	---	NA	NA
7938422	4.97032	5.65642	6.28882	5.73308	CTR9	Ctr9, Paf1/RNA polymerase II complex component, homolog (S. cerevisiae)	9646	609366	11
7938448	4.72633	5.94118	7.02963	6.61936	USP47	ubiquitin specific peptidase 47	55031	NA	11
7938519	5.42064	5.47097	6.09648	5.45018	MICALCL	MICAL C-terminal like	84953	612355	11
7938528	4.50493	6.81037	6.93425	6.68656	PARVA	parvin, alpha	55742	608120	11
7938544	5.0622	6.50969	7.21788	6.87958	TEAD1	TEA domain family member 1 (SV40 transcriptional enhancer factor)	7003	108985, 189967	11
7938559	5.30791	4.69995	4.03257	4.52341	RASSF10	Ras association (RalGDS/AF-6) domain family (N-terminal) member 10	644943	NA	11
7938561	4.21833	3.29333	3.00804	3.36673	---	---	NA	NA
7938590	4.15157	3.34189	2.88986	3.04758	---	---	NA	NA
7938592	4.25732	4.99819	5.25608	5.30941	FAR1	fatty acyl CoA reductase 1	84188	NA	11
7938625	4.16821	4.00924	3.68689	4.19481	---	---	NA	NA
7938629	3.53377	3.69658	3.50665	3.67224	PDE3B	phosphodiesterase 3B, cGMP-inhibited	5140	602047	11
7938669	6.36	7.55212	7.94845	7.75272	C11orf58	chromosome 11 open reading frame 58	10944	NA	11
7938681	6.4755	6.21652	5.81882	6.17762	---	---	NA	NA
7938683	7.29082	7.54927	7.77307	7.71481	LOC441453	similar to olfactory receptor, family 7, subfamily A, member 17	441453	NA
7938687	5.24138	6.61779	8.03153	7.01242	NUCB2	nucleobindin 2	4925	608020	11
7938730	4.59638	3.93292	3.63992	3.83383	MYOD1	myogenic differentiation 1	4654	159970	11
7938738	5.71521	4.91361	4.57816	4.79571	KCNC1	potassium voltage-gated channel, Shaw-related subfamily, member 1	3746	176258	11, 11
7938756	6.37147	6.82626	7.08663	6.83086	FAM10A5	family with sequence similarity 10, member A5 pseudogene	144106	NA
7938758	6.54025	9.23047	6.56182	8.2524	SAA1	serum amyloid A1	6288	104750	11
7938762	4.37338	4.85714	5.84716	5.28941	GTF2H1	general transcription factor IIH, polypeptide 1, 62kDa	2965	189972	11
7938777	5.98049	7.61635	8.53187	7.79596	LDHA	lactate dehydrogenase A	3939	150000	11
7938816	4.31819	4.49039	5.57361	4.83961	ZDHHC13	zinc finger, DHHC-type containing 13	54503	NA	11
7938880	4.50681	5.17349	6.02934	5.38168	HTATIP2	HIV-1 Tat interactive protein 2, 30kDa	10553	605628	11, 11, 11, 11, 11
7938890	5.28842	5.50273	5.47069	5.48088	PRMT3	protein arginine methyltransferase 3	10196	603190	11
7939005	5.7323	4.67674	4.51967	4.70825	---	---	NA	NA
7939007	4.33881	3.54845	3.449	3.58305	LUZP2	leucine zipper protein 2	338645	608178	11
7939056	2.85561	3.42645	4.88715	3.88537	BBOX1	butyrobetaine (gamma), 2-oxoglutarate dioxygenase (gamma-butyrobetaine hydroxylase) 1	8424	603312	11
7939068	8.93304	9.56532	10.0512	9.48486	RPS25	ribosomal protein S25	6230	180465	11
7939072	3.81026	3.53411	3.92912	3.84925	METT5D1	methyltransferase 5 domain containing 1	196074	NA	11
7939087	5.26326	5.9928	7.20191	6.13259	C11orf46	chromosome 11 open reading frame 46	120534	612295	11
7939093	3.84448	4.40563	5.0783	4.79256	DNAJC24	DnaJ (Hsp40) homolog, subfamily C, member 24	120526	611072	11
7939116	4.94633	4.31891	3.70678	4.01581	---	---	NA	NA
7939118	4.21545	3.62667	3.15588	3.47314	---	---	NA	NA
7939120	4.96319	6.72876	7.77534	7.43042	RCN1	reticulocalbin 1, EF-hand calcium binding domain	5954	602735	11
7939137	5.51912	6.73381	8.56842	7.12181	EIF3M	eukaryotic translation initiation factor 3, subunit M	10480	609641	11
7939150	5.03595	5.20982	6.0362	5.25949	PRRG4	proline rich Gla (G-carboxyglutamic acid) 4 (transmembrane)	79056	611690	11
7939158	5.33717	6.01886	6.78219	6.45758	QSER1	glutamine and serine rich 1	79832	NA	11
7939184	4.50224	4.81425	5.16899	5.21764	TCP11L1	t-complex 11 (mouse)-like 1	55346	NA	11, 11
7939197	4.8094	6.07284	7.45544	6.6971	HIPK3	homeodomain interacting protein kinase 3	10114	604424	11
7939240	4.28244	3.63086	3.17131	3.46492	---	---	NA	NA
7939242	6.15607	6.9359	7.81528	7.19734	CAPRIN1	cell cycle associated protein 1	4076	601178	11, 11
7939296	3.95254	3.476	3.14453	3.3717	---	---	NA	NA
7939298	4.40782	6.02339	7.45451	6.37836	CAT	catalase	847	115500	11
7939314	5.04383	5.72977	5.98593	5.7192	EHF	ets homologous factor	26298	605439	11
7939329	4.78839	5.80246	6.21475	5.71226	PDHX	pyruvate dehydrogenase complex, component X	8050	245349, 608769	11
7939341	8.0758	8.54442	9.34574	8.81593	CD44	CD44 molecule (Indian blood group)	960	107269	11
7939374	3.41504	3.77958	4.18556	4.09159	---	---	NA	NA
7939424	5.11398	6.59074	7.67391	6.55267	API5	apoptosis inhibitor 5	8539	609774	11
7939432	6.01987	5.54494	4.52172	5.2794	---	---	NA	NA
7939434	5.25629	6.34855	6.99346	6.98517	TTC17	tetratricopeptide repeat domain 17	55761	NA	11
7939465	4.53191	5.48821	6.54877	5.69461	HSD17B12	hydroxysteroid (17-beta) dehydrogenase 12	51144	609574	11
7939494	5.00038	4.35143	3.83026	4.06966	ACCSL	1-aminocyclopropane-1-carboxylate synthase homolog (Arabidopsis)(non-functional)-like	390110	NA	11
7939559	5.15234	5.29888	5.45519	5.42161	TSPAN18	tetraspanin 18	90139	NA	11, 11
7939581	5.75206	4.73535	4.14529	4.53971	FLJ41423	hypothetical LOC399886	399886	NA
7939640	5.08135	4.37581	4.09811	4.32857	---	---	NA	NA
7939657	7.09129	6.69346	6.26385	6.49795	DGKZ	diacylglycerol kinase, zeta 104kDa	8525	601441	11, 11, 11, 11
7939665	6.81592	6.19771	5.76819	6.21319	MDK	midkine (neurite growth-promoting factor 2)	4192	162096	11, 11, 11
7939767	5.16668	5.73964	5.84077	5.88787	MADD	MAP-kinase activating death domain	8567	603584	11, 11, 11
7939825	5.8374	6.72017	6.88858	6.49211	NDUFS3	NADH dehydrogenase (ubiquinone) Fe-S protein 3, 30kDa (NADH-coenzyme Q reductase)	4722	256000, 603846	11
7939865	4.24573	3.45441	2.94382	3.38012	OR4B1	olfactory receptor, family 4, subfamily B, member 1	119765	NA	11
7939869	4.13043	3.50742	3.07017	3.20749	OR4X1	olfactory receptor, family 4, subfamily X, member 1	390113	NA	11
7939897	6.16455	5.13918	4.98868	4.94812	LOC100291911	similar to Putative uncharacterized protein ENSP00000334305	NA	NA
7939900	4.96501	3.89518	4.03469	3.99027	OR4C13	olfactory receptor, family 4, subfamily C, member 13	283092	NA	11
7939932	4.5266	3.60488	3.63381	3.51601	OR4C6	olfactory receptor, family 4, subfamily C, member 6	219432	NA	11
7939950	4.37279	3.62637	3.34607	3.52055	OR5D16	olfactory receptor, family 5, subfamily D, member 16	390144	NA	11
7939983	4.36948	3.667	3.55905	3.74276	OR8U1	olfactory receptor, family 8, subfamily U, member 1	219417	NA	11
7939988	3.8228	3.19503	2.90251	2.84241	OR5M3	olfactory receptor, family 5, subfamily M, member 3	219482	NA	11
7939992	4.73045	4.01342	3.60121	3.99287	OR5AR1	olfactory receptor, family 5, subfamily AR, member 1	219493	NA	11
7939994	4.20588	3.32886	3.12398	3.36193	OR9G1	olfactory receptor, family 9, subfamily G, member 1	390174	NA	11
7940020	5.47416	4.56539	4.33147	4.61609	---	---	NA	NA
7940022	6.34212	5.8372	5.33068	5.55236	RTN4RL2	reticulon 4 receptor-like 2	349667	610462	11
7940028	6.08336	7.1411	8.37521	7.34446	SERPING1	serpin peptidase inhibitor, clade G (C1 inhibitor), member 1	710	106100, 120790, 606860	11, 11
7940066	5.88152	7.63749	7.8218	7.34813	TMX2	thioredoxin-related transmembrane protein 2	51075	NA	11
7940079	7.07351	8.0544	8.97768	8.47198	CTNND1	catenin (cadherin-associated protein), delta 1	1500	601045	11
7940108	4.1917	3.39407	3.42108	3.51293	OR6Q1	olfactory receptor, family 6, subfamily Q, member 1	219952	NA	11
7940112	5.46251	4.67643	4.52098	4.61497	OR9Q2	olfactory receptor, family 9, subfamily Q, member 2	219957	NA	11
7940118	4.27376	4.67556	5.35372	4.97497	ZFP91-CNTF	ZFP91-CNTF readthrough transcript	386607	NA	11
7940147	3.82876	3.75207	4.17062	4.28191	FAM111B	family with sequence similarity 111, member B	374393	NA	11
7940173	5.12216	4.44798	4.13108	4.25997	OR5A1	olfactory receptor, family 5, subfamily A, member 1	219982	NA	11
7940177	4.68587	3.9765	3.51989	3.74278	OR4D10	olfactory receptor, family 4, subfamily D, member 10	390197	NA	11
7940182	6.77307	6.30966	5.72196	6.27965	OR4D10	olfactory receptor, family 4, subfamily D, member 10	390197	NA	11
7940341	4.81099	3.83416	3.32451	3.62247	MS4A10	membrane-spanning 4-domains, subfamily A, member 10	341116	608403	11
7940473	5.11105	5.4538	5.49209	5.48467	TMEM138	transmembrane protein 138	51524	NA	11
7940486	4.59132	5.37436	6.29214	5.31791	C11orf79	chromosome 11 open reading frame 79	54949	NA	11
7940565	5.86524	6.56659	7.92921	5.8662	FADS2	fatty acid desaturase 2	9415	606149	11
7940580	4.74408	4.79909	5.17272	5.26474	---	---	NA	NA
7940600	5.82443	5.7558	4.74196	5.32993	INCENP	inner centromere protein antigens 135/155kDa	3619	604411	11
7940626	5.06624	5.48915	6.3389	5.3209	SCGB2A1	secretoglobin, family 2A, member 1	4246	604398	11
7940630	5.34295	6.69199	8.528	6.39485	SCGB1D2	secretoglobin, family 1D, member 2	10647	NA	11
7940636	7.04301	7.77742	9.14352	7.9559	SCGB2A2	secretoglobin, family 2A, member 2	4250	605562	11
7940688	5.95167	6.40805	6.9474	6.57797	POLR2G	polymerase (RNA) II (DNA directed) polypeptide G	5436	602013	11
7940775	5.94949	5.7781	5.34201	5.4932	RARRES3	retinoic acid receptor responder (tazarotene induced) 3	5920	605092	11
7940790	5.45019	4.94308	4.27729	4.58686	C11orf84	chromosome 11 open reading frame 84	144097	NA	11
7940822	5.53456	5.30304	4.6613	4.82207	---	---	NA	NA
7940835	7.0573	8.58831	8.44296	7.89941	COX8A	cytochrome c oxidase subunit 8A (ubiquitous)	1351	123870	11
7940857	6.01804	6.3499	6.47932	5.99949	STIP1	stress-induced-phosphoprotein 1	10963	605063	11
7940904	6.71292	6.46098	5.72977	6.03016	VEGFB	vascular endothelial growth factor B	7423	601398	11
7940959	6.00453	5.58514	4.83435	5.45027	GPR137	G protein-coupled receptor 137	56834	NA	11
7940989	4.98702	4.9174	4.33227	4.45052	ESRRA	estrogen-related receptor alpha	2101	601998	11
7940996	8.11966	9.5471	9.58639	9.10916	PRDX5	peroxiredoxin 5	25824	606583	11
7941062	6.23271	5.63179	5.09971	5.59972	SLC22A11	solute carrier family 22 (organic anion/urate transporter), member 11	55867	607097	11
7941104	6.16548	6.88457	6.58628	6.65179	ARL2	ADP-ribosylation factor-like 2	402	601175	11
7941148	6.01401	6.01431	5.46901	5.3684	TM7SF2	transmembrane 7 superfamily member 2	7108	603414	11
7941243	5.90305	6.83509	6.66533	6.68834	DPF2	D4, zinc and double PHD fingers family 2	5977	601671	11
7941469	6.54014	5.80933	5.32925	5.85142	TSGA10IP	testis specific, 10 interacting protein	254187	NA	11
7941501	8.15607	7.39736	6.68249	7.25981	BANF1	barrier to autointegration factor 1	8815	603811	11
7941505	6.96327	7.29654	10.523	7.00934	CST6	cystatin E/M	1474	601891	11
7941563	5.40515	6.46988	5.84059	6.45089	---	---	NA	NA
7941583	6.20241	7.4146	6.99702	6.58071	RAB1B	RAB1B, member RAS oncogene family	81876	612565	11
7941587	6.48328	5.93942	5.18558	5.53638	CNIH2	cornichon homolog 2 (Drosophila)	254263	611288	11
7941597	4.11198	3.53046	3.02242	3.3005	---	---	NA	NA
7941599	4.9205	4.16154	3.91291	3.9715	NPAS4	neuronal PAS domain protein 4	266743	608554	11
7941639	4.01037	4.43888	4.44788	4.10642	BBS1	Bardet-Biedl syndrome 1	582	209900, 209901	11
7941662	5.31714	4.65453	4.21398	4.40298	ACTN3	actinin, alpha 3	89	102574	11
7941702	4.6107	5.30561	5.7567	5.75223	RBM14	RNA binding motif protein 14	10432	612409	11
7941707	4.53171	5.15385	5.86312	5.79554	RBM14	RNA binding motif protein 14	10432	612409	11
7941746	6.73634	6.13591	5.28585	6.0425	C11orf86	chromosome 11 open reading frame 86	254439	NA	11
7941769	5.75721	6.80913	6.68173	6.83771	FBXL11	F-box and leucine-rich repeat protein 11	22992	605657	11
7941879	6.11249	5.69727	5.03639	5.47428	TBC1D10C	TBC1 domain family, member 10C	374403	610831	11
7941917	5.74347	4.99369	4.48416	4.72081	CABP4	calcium binding protein 4	57010	608965, 610427	11
7941936	6.71902	8.66132	8.87315	8.25988	GSTP1	glutathione S-transferase pi 1	2950	134660	11
7941946	6.48413	7.90268	7.59327	7.65103	NDUFV1	NADH dehydrogenase (ubiquinone) flavoprotein 1, 51kDa	4723	161015, 203450, 252010, 256000	11
7942032	5.32542	6.28645	6.77652	6.64501	SAPS3	SAPS domain family, member 3	55291	610879	11
7942064	6.56026	6.51509	8.0186	6.19353	GAL	galanin prepropeptide	51083	137035	11
7942071	3.635	3.3143	3.48752	2.98593	---	---	NA	NA
7942174	5.48056	6.74468	6.94674	7.00557	PPFIA1	protein tyrosine phosphatase, receptor type, f polypeptide (PTPRF), interacting protein (liprin), alpha 1	8500	611054	11, 11
7942228	6.62552	6.08984	5.7857	5.9615	C11orf76	chromosome 11 open reading frame 76	220070	NA
7942261	5.6612	5.08785	5.22936	5.18413	KRTAP5-9	keratin associated protein 5-9	3846	148021	11
7942274	4.50508	4.28852	3.99817	4.13902	OR7E87P	olfactory receptor, family 7, subfamily E, member 87 pseudogene	NA	NA
7942287	6.08935	5.52099	4.99888	5.33214	---	---	NA	NA
7942326	4.27723	3.76316	3.68308	3.70101	---	---	NA	NA
7942476	4.06628	4.68948	5.37088	4.88965	PAAF1	proteasomal ATPase-associated factor 1	80227	NA	11
7942489	4.63229	3.93536	3.56594	3.89391	DNAJB13	DnaJ (Hsp40) related, subfamily B, member 13	374407	610263	11
7942520	4.29694	4.89407	5.47919	5.19562	POLD3	polymerase (DNA-directed), delta 3, accessory subunit	10714	611415	11
7942527	4.91908	5.56137	6.36521	5.98533	POLD3	polymerase (DNA-directed), delta 3, accessory subunit	10714	611415	11
7942544	4.45459	5.41175	5.6726	5.68717	RNF169	ring finger protein 169	254225	NA	11
7942551	3.25588	3.40556	4.70857	4.27793	---	---	NA	NA
7942553	4.58885	6.57063	8.12402	6.68306	SPCS2	signal peptidase complex subunit 2 homolog (S. cerevisiae)	9789	NA	11
7942586	10.019	10.8595	11.2134	10.9194	RPS3	ribosomal protein S3	6188	600454	11
7942594	4.88676	4.31202	4.21589	4.30011	SNORD15B	small nucleolar RNA, C/D box 15B	114599	NA	11
7942603	4.08974	3.73797	2.91633	3.499	MOGAT2	monoacylglycerol O-acyltransferase 2	80168	610270	11
7942613	5.74594	5.7625	6.14817	5.43357	DGAT2	diacylglycerol O-acyltransferase homolog 2 (mouse)	84649	606983	11
7942626	4.55822	5.36848	5.82847	5.74637	UVRAG	UV radiation resistance associated gene	7405	602493	11
7942647	4.30751	3.49266	3.32994	3.63087	LOC387790	hypothetical LOC387790	387790	NA
7942779	5.74379	4.95075	5.23066	5.57181	---	---	NA	NA
7942781	4.34027	3.78056	3.78891	3.75098	---	---	NA	NA
7942783	5.87245	6.64665	7.13967	6.66442	C11orf67	chromosome 11 open reading frame 67	28971	NA	11
7942793	5.9543	7.36504	8.73403	7.05057	THRSP	thyroid hormone responsive (SPOT14 homolog, rat)	7069	601926	11
7942798	5.0901	4.43269	3.68153	4.2063	USP35	ubiquitin specific peptidase 35	57558	NA	11
7942812	6.4851	5.69925	4.63843	5.14442	---	---	NA	NA
7942820	6.70923	6.00153	5.41103	5.64956	---	---	NA	NA
7942824	9.62627	10.6454	10.6857	9.98688	RPS28	ribosomal protein S28	6234	603685	19
7942830	4.62031	4.46919	4.64881	4.94858	GCRG224	GCRG-P224	NA	NA
7942839	6.01827	6.37734	6.6789	6.77354	PCF11	PCF11, cleavage and polyadenylation factor subunit, homolog (S. cerevisiae)	51585	608876	11
7942858	3.59473	3.8177	4.53123	4.0811	ANKRD42	ankyrin repeat domain 42	338699	NA	11
7942875	8.74678	7.90305	6.17407	7.68131	---	---	NA	NA
7942877	6.03359	5.88961	5.11447	5.45689	---	---	NA	NA
7942879	4.5431	5.89089	7.26169	6.5464	TMEM126B	transmembrane protein 126B	55863	NA	11
7942889	4.18722	5.02894	6.113	5.19315	TMEM126A	transmembrane protein 126A	84233	NA	11
7942912	6.26484	6.07708	7.06792	6.72084	---	---	NA	NA
7942914	6.06709	6.3954	6.92632	6.91779	EED	embryonic ectoderm development	8726	605984	11
7942957	5.14031	5.50644	5.67957	5.64784	PRSS23	protease, serine, 23	11098	NA	11
7942989	5.41373	4.49548	4.42815	4.27312	---	---	NA	NA
7942991	4.46341	4.04379	3.77135	4.1359	TYR	tyrosinase (oculocutaneous albinism IA)	7299	103470, 203100, 601800, 606933, 606952	11
7943031	3.91001	3.63808	3.14734	3.50795	TRIM64	tripartite motif-containing 64	120146	NA	11
7943126	4.57977	4.97382	5.21308	5.50703	KIAA1731	KIAA1731	85459	NA	11
7943158	2.88598	5.98127	7.11662	7.1249	SCARNA9	small Cajal body-specific RNA 9	619383	NA	11
7943160	8.90833	10.1989	10.1373	10.3217	SCARNA9	small Cajal body-specific RNA 9	619383	NA	11
7943162	3.95846	5.02952	6.34604	5.5229	C11orf54	chromosome 11 open reading frame 54	28970	NA	11
7943176	3.0088	3.87416	4.62997	4.29857	MED17	mediator complex subunit 17	9440	603810	11
7943195	5.49013	4.7226	3.94468	4.21997	---	---	NA	NA
7943231	4.41291	5.1162	5.54897	5.5506	ANKRD49	ankyrin repeat domain 49	54851	NA	11
7943293	4.85227	5.58149	5.97508	5.29966	ENDOD1	endonuclease domain containing 1	23052	NA	11
7943297	4.14598	5.02067	5.78741	5.72706	CEP57	centrosomal protein 57kDa	9702	607951	11
7943317	4.34348	4.012	3.8553	4.16255	---	---	NA	NA
7943367	5.89722	5.14683	4.85308	5.22718	---	---	NA	NA
7943369	3.18307	3.38072	3.91038	3.84496	TMEM133	transmembrane protein 133	83935	NA	11
7943376	4.31097	4.93013	4.87666	4.85382	KIAA1377	KIAA1377	57562	NA	11
7943411	5.36063	4.92265	4.13126	4.32492	---	---	NA	NA
7943413	4.6133	4.81031	5.19976	5.30639	BIRC3	baculoviral IAP repeat-containing 3	330	601721	11
7943424	4.62969	5.66238	6.39706	6.21834	BIRC2	baculoviral IAP repeat-containing 2	329	601712	11
7943442	3.96195	4.25428	4.62297	4.87187	DYNC2H1	dynein, cytoplasmic 2, heavy chain 1	79659	603297	11
7943515	3.65029	2.48294	2.72874	2.87509	---	---	NA	NA
7943562	4.01322	3.66155	6.11387	3.54972	ELMOD1	ELMO/CED-12 domain containing 1	55531	NA	11
7943580	4.22677	4.60639	5.84268	5.28228	CUL5	cullin 5	8065	601741	11
7943605	4.42999	5.2473	6.18844	5.70198	ACAT1	acetyl-Coenzyme A acetyltransferase 1	38	203750, 607809	11
7943620	3.99896	4.83703	5.80515	5.81693	ATM	ataxia telangiectasia mutated	472	114480, 208900, 607585	11, 11
7943690	5.11994	5.61037	5.61498	5.67153	DDX10	DEAD (Asp-Glu-Ala-Asp) box polypeptide 10	1662	601235	11
7943715	3.90275	4.65948	5.61518	5.0942	ZC3H12C	zinc finger CCCH-type containing 12C	85463	NA	11
7943740	4.3475	3.57345	3.11875	3.5848	C11orf88	chromosome 11 open reading frame 88	399949	NA	11
7943760	5.02958	5.48611	5.38701	5.56074	SIK2	salt-inducible kinase 2	23235	608973	11
7943779	4.01728	4.64284	5.54628	4.84108	C11orf1	chromosome 11 open reading frame 1	64776	NA	11
7943803	5.35075	5.80598	5.43695	5.87518	DIXDC1	DIX domain containing 1	85458	610493	11, 11
7943827	4.73403	5.81709	5.87021	5.46343	DLAT	dihydrolipoamide S-acetyltransferase	1737	245348, 608770	11
7943882	5.03262	5.65139	6.85319	6.0636	PTS	6-pyruvoyltetrahydropterin synthase	5805	261640	11
7943917	4.29373	3.81457	3.59226	4.18845	---	---	NA	NA
7943954	5.49925	5.37833	4.87442	4.96857	---	---	NA	NA
7943969	5.42713	4.67899	4.33765	4.56673	HTR3A	5-hydroxytryptamine (serotonin) receptor 3A	3359	182139	11
7943984	6.39327	6.56389	5.89783	6.05497	ZBTB16	zinc finger and BTB domain containing 16	7704	176797, 612447	11, 11
7943998	6.00851	6.25135	6.10054	5.65817	NNMT	nicotinamide N-methyltransferase	4837	600008	11
7944006	3.80822	4.3396	5.08674	4.48502	RBM7	RNA binding motif protein 7	10179	612413	11
7944011	4.7415	6.13701	7.08143	6.40724	REXO2	REX2, RNA exonuclease 2 homolog (S. cerevisiae)	25996	607149	11
7944035	5.25061	4.55264	4.00427	4.38982	APOC3	apolipoprotein C-III	345	107720	11
7944049	5.78703	6.4259	6.58179	6.08915	SIDT2	SID1 transmembrane family, member 2	51092	NA	11
7944082	5.16429	6.42661	5.51614	6.43878	TAGLN	transgelin	6876	600818	11
7944096	4.9519	5.71259	5.51433	5.71365	RNF214	ring finger protein 214	257160	NA	11, 11
7944147	5.90399	5.06918	4.70415	5.08883	FXYD2	FXYD domain containing ion transport regulator 2	NA	NA
7944179	4.29049	4.05694	4.35935	3.93748	CD3E	CD3e molecule, epsilon (CD3-TCR complex)	916	186830, 608971	11
7944195	4.74628	5.53359	6.80149	5.97061	UBE4A	ubiquitination factor E4A (UFD2 homolog, yeast)	9354	603753	11
7944216	8.04123	8.84237	9.40775	8.75242	ATP5L	ATP synthase, H+ transporting, mitochondrial F0 complex, subunit G	10632	NA	11
7944223	5.4322	6.84535	7.40946	7.45853	MLL	myeloid/lymphoid or mixed-lineage leukemia (trithorax homolog, Drosophila)	4297	159555	11
7944285	4.63928	6.18392	7.39891	6.57654	ARCN1	archain 1	372	600820	11
7944339	5.70706	5.95197	5.97285	6.16252	---	---	NA	NA
7944375	4.06222	5.19313	5.92646	4.91061	TRAPPC4	trafficking protein particle complex 4	51399	610971	11
7944382	5.27604	5.56078	5.79877	5.60796	VPS11	vacuolar protein sorting 11 homolog (S. cerevisiae)	55823	608549	11
7944493	4.73921	5.01016	5.50662	5.15164	CBL	Cas-Br-M (murine) ecotropic retroviral transforming sequence	867	165360	11
7944525	4.83013	5.34013	6.42665	5.97742	---	---	NA	NA
7944527	5.03282	4.21723	3.85985	4.20994	LOC729173	hypothetical protein LOC729173	729173	NA
7944537	5.73015	5.8954	6.59736	5.98113	POU2F3	POU class 2 homeobox 3	25833	607394	11
7944560	5.09554	6.616	7.86765	7.32198	ARHGEF12	Rho guanine nucleotide exchange factor (GEF) 12	23365	601626, 604763	11
7944623	4.18315	4.63514	5.14568	5.02465	TBCEL	tubulin folding cofactor E-like	219899	610451	11, 11
7944656	3.93016	4.6905	5.83143	4.6843	SC5DL	sterol-C5-desaturase (ERG3 delta-5-desaturase homolog, S. cerevisiae)-like	6309	602286, 607330	11, 11
7944716	4.47891	3.78418	3.55239	3.93896	---	---	NA	NA
7944720	5.83454	4.96577	4.46914	5.24733	---	---	NA	NA
7944791	5.27589	4.69997	4.30929	4.72104	---	---	NA	NA
7944795	5.99269	5.18501	4.81504	4.9615	OR4D5	olfactory receptor, family 4, subfamily D, member 5	219875	NA	11
7944799	4.98788	4.10527	3.77687	4.04712	OR10G9	olfactory receptor, family 10, subfamily G, member 9	219870	NA	11
7944801	4.15283	3.54304	3.0618	3.33302	OR10G8	olfactory receptor, family 10, subfamily G, member 8	219869	NA	11
7944803	4.16177	4.40144	5.11639	4.83882	VWA5A	von Willebrand factor A domain containing 5A	4013	602929	11, 11
7944838	4.04151	3.12274	2.90348	3.05656	OR8G5	olfactory receptor, family 8, subfamily G, member 5	219865	NA	11
7944843	4.81937	3.86633	3.44409	3.8654	OR8A1	olfactory receptor, family 8, subfamily A, member 1	390275	NA	11
7944850	4.99386	5.22714	5.73002	5.7586	TBRG1	transforming growth factor beta regulator 1	84897	610614	11
7944867	6.63992	7.00928	7.31751	7.02418	SIAE	sialic acid acetylesterase	NA	NA
7944876	5.57225	4.93608	4.64305	4.71497	NRGN	neurogranin (protein kinase C substrate, RC3)	NA	NA	NA
7944911	4.57299	4.88117	4.50377	4.74633	HEPN1	HEPACAM opposite strand 1	641654	611641	11
7944931	4.86716	4.27913	4.84922	4.04605	SLC37A2	solute carrier family 37 (glycerol-3-phosphate transporter), member 2	219855	NA	11
7944970	6.28501	7.63971	6.85144	8.07778	---	---	NA	NA
7944972	5.30097	4.72309	4.16611	4.5425	MGC39545	hypothetical protein LOC403312	NA	NA
7944978	4.98973	6.16002	7.3007	6.07114	EI24	etoposide induced 2.4 mRNA	9538	605170	11
7944991	5.61705	6.38484	7.68023	6.90741	STT3A	STT3, subunit of the oligosaccharyltransferase complex, homolog A (S. cerevisiae)	3703	601134	11
7945125	6.2435	5.44118	5.09792	5.29208	PRR10	proline rich 10	283165	NA
7945130	5.41926	4.91734	4.31472	4.68373	---	---	NA	NA
7945156	5.40119	4.95083	6.2266	6.59934	---	---	NA	NA
7945169	4.69742	4.54626	4.87798	4.26038	TMEM45B	transmembrane protein 45B	120224	NA	11
7945177	4.76111	4.2973	3.62955	3.97807	NCRNA00167	non-protein coding RNA 167	440072	NA	11
7945182	5.8553	8.0004	8.31403	8.01885	APLP2	amyloid beta (A4) precursor-like protein 2	334	104776	11
7945228	4.60882	3.95349	3.49181	3.75347	FLJ34521	hypothetical protein LOC646383	646383	NA
7945241	5.07395	4.29919	3.96595	4.40859	C11orf44	chromosome 11 open reading frame 44	283171	NA
7945262	4.51614	4.74705	5.23427	5.37114	JAM3	junctional adhesion molecule 3	83700	606871	11
7945342	6.36156	6.80863	6.66626	7.05376	C20orf69	chromosome 20 open reading frame 69	140849	NA
7945347	3.48986	2.96587	3.31412	3.51341	---	---	NA	NA
7945368	4.98926	4.32297	4.06796	4.18424	IFITM5	interferon induced transmembrane protein 5	387733	NA	11
7945371	6.87802	7.65301	7.28499	7.40593	IFITM3	interferon induced transmembrane protein 3 (1-8U)	10410	605579	11
7945377	5.36093	4.96894	4.27267	4.88895	SIGIRR	single immunoglobulin and toll-interleukin 1 receptor (TIR) domain	59307	605478	11, 11
7945498	6.30892	5.69163	5.30754	5.46773	SCT	secretin	6343	182099	11
7945573	7.78471	8.85003	8.40489	8.18842	POLR2L	polymerase (RNA) II (DNA directed) polypeptide L, 7.6kDa	5441	601189	11
7945579	5.57198	6.23426	6.32892	5.76682	CHID1	chitinase domain containing 1	66005	NA	11, 11
7945641	6.04065	5.25769	4.56264	5.08545	DUSP8	dual specificity phosphatase 8	1850	602038	11
7945657	7.98451	7.18821	7.98122	7.15286	KRTAP5-4	keratin associated protein 5-4	387267	NA	11
7945678	6.24905	5.49185	4.83993	5.30489	C11orf89	chromosome 11 open reading frame 89	NA	NA
7945680	6.56348	7.46109	6.73987	7.90982	H19	H19, imprinted maternally expressed transcript (non-protein coding)	283120	103280, 130650, 180860	11
7945730	5.26888	4.7104	4.81827	4.95122	ASCL2	achaete-scute complex homolog 2 (Drosophila)	430	601886	11
7945801	5.00809	4.32163	4.11557	4.52033	SNORA54	small nucleolar RNA, H/ACA box 54	677833	NA	11
7945829	4.961	4.91734	4.63373	4.60393	---	---	NA	NA
7945857	4.94717	4.34853	3.67289	4.16094	MRGPRG	MAS-related GPR, member G	386746	607234
7945873	5.88398	6.63355	6.73454	6.75522	MGC72080 /// DAPL1	MGC72080 pseudogene /// death associated protein-like 1	NA	NA
7945892	7.35508	6.88936	6.08101	6.49285	---	---	NA	NA
7945902	4.56975	5.18136	5.61974	5.27123	NUP98	nucleoporin 98kDa	4928	601021	11, 11
7945952	4.83739	3.76973	3.47454	3.61446	---	---	NA	NA
7945954	4.20547	3.4281	3.01174	3.57253	hCG_1651160	Ssu72 RNA polymerase II CTD phosphatase-like	136157	NA	7
7945958	4.93991	4.49446	3.74416	4.0619	OR52B4	olfactory receptor, family 52, subfamily B, member 4	143496	NA	11
7946004	6.50873	5.79327	5.22443	5.70123	OR51S1	olfactory receptor, family 51, subfamily S, member 1	119692	NA	11
7946006	5.23824	4.39719	4.07408	4.41194	OR51H1P	olfactory receptor, family 51, subfamily H, member 1 pseudogene	NA	NA
7946011	4.15229	3.30957	3.0873	3.42852	OR51G2	olfactory receptor, family 51, subfamily G, member 2	81282	NA	11
7946015	5.89153	5.03114	4.62052	4.75083	OR51A4	olfactory receptor, family 51, subfamily A, member 4	401666	NA	11
7946033	4.74359	5.33523	7.49275	5.15222	HBB	hemoglobin, beta	3043	140700, 141900, 603902, 603903, 604131	11
7946061	4.3075	3.45207	3.29558	3.25904	HBE1	hemoglobin, epsilon 1	3046	142100	11
7946073	5.2596	4.54424	4.05662	4.42968	OR51I1	olfactory receptor, family 51, subfamily I, member 1	390063	NA	11
7946117	4.49678	3.62684	3.43133	3.59666	OR56A4	olfactory receptor, family 56, subfamily A, member 4	120793	NA	11
7946125	4.81871	4.08471	3.64354	3.99751	OR52B2	olfactory receptor, family 52, subfamily B, member 2	255725	NA	11
7946201	5.63857	6.17901	5.65175	5.87712	ARFIP2	ADP-ribosylation factor interacting protein 2	23647	601638	11
7946211	4.35284	4.80004	4.86666	4.92705	RRP8	ribosomal RNA processing 8, methyltransferase, homolog (yeast)	23378	NA	11
7946228	5.01901	5.80131	5.98631	5.66114	TPP1	tripeptidyl peptidase I	1200	204500, 607998	11
7946292	4.74488	5.14254	6.13402	5.05258	CYB5R2	cytochrome b5 reductase 2	51700	608342	11
7946306	3.87299	3.47259	3.7924	3.41537	OVCH2	ovochymase 2	341277	NA	11
7946328	3.99643	3.61737	3.8599	4.7493	---	---	NA	NA
7946401	5.31006	5.91814	5.11646	5.5614	ST5	suppression of tumorigenicity 5	6764	140750	11, 11, 11
7946426	5.15227	5.28414	5.03977	5.48057	---	---	NA	NA
7946428	4.80577	4.5472	4.03528	4.40685	C11orf16	chromosome 11 open reading frame 16	56673	NA	11
7946436	4.18992	3.43657	3.46738	3.48292	ASCL3	achaete-scute complex homolog 3 (Drosophila)	56676	609154	11
7946439	5.31501	6.38708	7.29981	6.47912	TMEM9B	TMEM9 domain family, member B	56674	NA	11
7946516	5.22262	5.82368	6.53778	6.31359	SBF2	SET binding factor 2	81846	604563, 607697	11
7946559	5.26227	6.70025	6.69862	6.8232	GNG10	guanine nucleotide binding protein (G protein), gamma 10	2790	604389	9
7946561	5.26934	4.55494	3.77357	4.34399	---	---	NA	NA
7946563	9.68526	10.2297	9.86308	10.0522	---	---	NA	NA
7946567	7.65636	7.48879	7.22876	7.43138	---	---	NA	NA
7946569	4.45329	6.22533	6.94528	6.41312	RNF141	ring finger protein 141	50862	NA	11
7946579	4.08325	4.29546	5.34389	4.61825	LYVE1	lymphatic vessel endothelial hyaluronan receptor 1	10894	605702	11
7946610	7.47058	8.44492	9.41148	8.67202	EIF4G2	eukaryotic translation initiation factor 4 gamma, 2	1982	602325	11
7946635	5.32365	5.72056	6.66032	6.37157	ZBED5	zinc finger, BED-type containing 5	58486	NA	11
7946655	4.89548	5.51681	6.25661	5.6452	CSNK2A1P	casein kinase 2, alpha 1 polypeptide pseudogene	283106	NA	11
7946676	7.85113	7.69705	7.44794	7.7259	---	---	NA	NA
7946680	4.98988	5.52632	6.03791	5.85446	BTBD10	BTB (POZ) domain containing 10	84280	NA	11
7946695	5.053	2.69871	2.30178	2.92648	---	---	NA	NA
7946703	4.37684	5.39506	6.82478	6.14617	COPB1	coatomer protein complex, subunit beta 1	1315	600959	11, 11, 11
7946728	4.47494	5.43278	7.10317	6.02102	PSMA1	proteasome (prosome, macropain) subunit, alpha type, 1	5682	602854	11, 11, 11
7946742	4.36846	4.44703	5.01343	4.78701	CYP2R1	cytochrome P450, family 2, subfamily R, polypeptide 1	120227	600081, 608713	11
7946757	4.7571	4.94366	5.24737	5.3964	SOX6	SRY (sex determining region Y)-box 6	55553	607257	11, 11
7946781	5.12631	5.45143	4.93233	5.25754	PLEKHA7	pleckstrin homology domain containing, family A member 7	144100	NA	11
7946807	8.76875	9.19377	9.91198	9.31505	RPL36AP8	ribosomal protein L36a pseudogene 8	643007	NA	15
7946812	9.98154	10.7592	11.141	10.6624	RPS13	ribosomal protein S13	6207	180476	11
7946815	4.43812	5.52048	6.26835	6.16299	PIK3C2A	phosphoinositide-3-kinase, class 2, alpha polypeptide	5286	603601	11
7946849	5.95566	5.31405	4.41499	4.89349	---	---	NA	NA
7946903	5.49208	4.6388	4.14769	4.58297	USH1C	Usher syndrome 1C (autosomal recessive, severe)	10083	276904, 602092, 605242	11
7946933	5.47651	6.26167	6.02291	5.99583	SERGEF	secretion regulating guanine nucleotide exchange factor	26297	606051	11
7946983	4.97301	7.08285	4.76816	6.49757	SAA2	serum amyloid A2	6289	104751	11, 11
7947015	4.39915	5.56918	6.85299	5.65205	TSG101	tumor susceptibility gene 101	7251	601387	11
7947027	4.28556	4.87573	5.96916	4.87411	UEVLD	UEV and lactate/malate dehyrogenase domains	55293	610985	11
7947129	4.98477	4.32649	3.81872	4.13868	DBX1	developing brain homeobox 1	120237	NA	11
7947136	4.94614	4.33065	3.99804	4.03594	---	---	NA	NA
7947147	5.48934	5.18736	5.55937	4.99263	SVIP	small VCP/p97-interacting protein	258010	NA	11
7947156	4.08836	4.69471	6.82017	4.83634	MUC15	mucin 15, cell surface associated	143662	608566	11
7947184	3.24009	3.44462	4.29758	3.71052	---	---	NA	NA
7947199	4.62434	4.86843	5.53864	5.2656	LGR4	leucine-rich repeat-containing G protein-coupled receptor 4	55366	606666	11
7947221	5.54214	6.19224	6.91766	6.3534	LIN7C	lin-7 homolog C (C. elegans)	55327	612332	11
7947245	5.40363	5.53518	6.15593	5.76748	HSP90AA2	heat shock protein 90kDa alpha (cytosolic), class A member 2	3324	140575
7947266	4.41474	3.45837	2.90433	3.00377	---	---	NA	NA
7947358	7.39054	7.95312	8.30565	8.39703	LOC100190939 /// RCN1 /// LOC100291449	hypothetical LOC100190939 /// reticulocalbin 1, EF-hand calcium binding domain /// hypothetical protein LOC100291449	NA	NA
7947363	5.27483	4.45865	4.09802	4.38503	WT1	Wilms tumor 1	7490	136680, 194070, 194072, 194080, 256370, 607102, 608978	11
7947394	3.98288	3.26895	2.81652	3.03569	---	---	NA	NA
7947396	5.38865	6.04281	7.11029	6.57737	CSTF3	cleavage stimulation factor, 3' pre-RNA, subunit 3, 77kDa	1479	600367	11, 11
7947421	7.25278	6.20951	5.90288	5.9943	---	---	NA	NA
7947423	7.51928	6.422	6.56512	6.54466	---	---	NA	NA
7947425	6.17976	8.06338	8.67815	8.14259	CD59	CD59 molecule, complement regulatory protein	966	107271, 612300	11, 11, 11
7947434	3.9667	4.44959	5.22044	4.69284	FBXO3	F-box protein 3	26273	609089	11, 11
7947510	4.72776	3.59216	2.6858	3.05919	---	---	NA	NA
7947540	4.45435	5.09413	5.87512	5.54358	TRAF6	TNF receptor-associated factor 6	7189	602355	11
7947624	6.08338	7.05512	7.15162	7.28434	PHF21A	PHD finger protein 21A	51317	608325	11
7947674	5.89968	6.25576	6.26499	5.83092	RPS10	ribosomal protein S10	6204	603632	6
7947681	5.08378	5.95468	6.73883	5.82381	ARHGAP1	Rho GTPase activating protein 1	392	602732	11
7947694	4.32867	5.30212	6.32172	5.50959	CKAP5	cytoskeleton associated protein 5	9793	611142	11
7947740	6.35564	6.20869	5.77023	6.47116	---	---	NA	NA
7947861	6.56092	5.88352	5.61585	5.72853	SPI1	spleen focus forming virus (SFFV) proviral integration oncogene spi1	6688	165170	11
7947867	5.84866	6.66955	7.12513	6.50062	PSMC3	proteasome (prosome, macropain) 26S subunit, ATPase, 3	5702	186852	11
7947881	5.85038	4.99886	4.54575	4.86532	RAPSN	receptor-associated protein of the synapse	5913	208150, 601592, 608931	11
7947892	4.18654	4.24276	3.55939	3.86474	---	---	NA	NA
7947928	6.24123	5.49938	4.97697	5.31504	C1QTNF4	C1q and tumor necrosis factor related protein 4	114900	NA	11
7947934	5.02653	7.18859	7.67902	7.10179	MTCH2	mitochondrial carrier homolog 2 (C. elegans)	23788	NA	11
7947969	7.70073	7.93385	7.58166	8.19329	FNBP4	formin binding protein 4	23360	NA	11
7947989	6.41969	6.63188	7.35525	7.15243	---	---	NA	NA
7947991	4.47576	4.94492	5.95633	5.50706	NUP160	nucleoporin 160kDa	23279	607614	11
7948033	4.35658	3.9327	3.96482	4.15941	---	---	NA	NA
7948054	5.71946	5.28619	4.70629	5.0555	---	---	NA	NA
7948085	3.89295	3.7133	3.53884	3.85476	TYR	tyrosinase (oculocutaneous albinism IA)	7299	103470, 203100, 601800, 606933, 606952	11
7948088	4.3349	4.24475	4.53162	4.32253	SLC25A33	solute carrier family 25, member 33	NA	NA
7948117	4.23847	3.40599	3.17206	3.40643	---	---	NA	NA
7948131	4.16791	3.45938	3.20494	3.38615	OR5M9	olfactory receptor, family 5, subfamily M, member 9	390162	NA	11
7948133	3.94736	3.14491	2.85884	3.13697	OR5M3	olfactory receptor, family 5, subfamily M, member 3	219482	NA	11
7948141	4.17615	3.75923	3.30271	3.55962	---	---	NA	NA
7948148	3.99268	3.3978	2.80209	3.09313	OR5M10	olfactory receptor, family 5, subfamily M, member 10	390167	NA	11
7948161	4.65515	3.6977	3.24414	3.39844	---	---	NA	NA
7948211	5.23938	5.63542	5.37102	5.58266	SSRP1	structure specific recognition protein 1	6749	604328	11
7948213	5.47854	4.57469	4.25596	4.54771	PRG3	proteoglycan 3	10394	606814	11
7948229	5.69503	6.11823	5.98336	6.30355	SLC43A3	solute carrier family 43, member 3	29015	NA	11, 11, 11
7948267	5.72494	6.88094	6.8637	6.13288	TIMM10	translocase of inner mitochondrial membrane 10 homolog (yeast)	26519	602251	11
7948303	5.26606	4.14956	4.17878	4.39563	---	---	NA	NA
7948332	3.98149	4.43467	4.50987	4.56355	LPXN	leupaxin	9404	605390	11, 11
7948354	3.77077	3.40844	3.60357	3.45597	GLYATL2	glycine-N-acyltransferase-like 2	219970	NA	11
7948377	4.20038	3.00019	2.90618	3.00464	OR5A2	olfactory receptor, family 5, subfamily A, member 2	219981	NA	11
7948397	4.24708	3.66752	3.89937	3.55494	---	---	NA	NA
7948399	6.45894	7.14483	7.91668	7.53795	PATL1	protein associated with topoisomerase II homolog 1 (yeast)	219988	NA	11
[truncated: 8,933 more rows]
